# Supplementary material for: Transcriptome-wide profiling of N6-methyladenosine via a selective chemical labeling method
Source: Royal Society of Chemistry journal article supplement (doi:10.1039/d2sc03181g), 2022-01-01
Supplement: d2sc03181g1.xlsx [file d2sc03181g1.xlsx]

## Sheet: MeRIP_1
chr	chromStart	chromEnd	name	score	strand	thickStart	thickEnd	itemRgb	blockCount	blockSizes	blockStarts
chr1	843078	843139	ENSG00000228794.9	0.0038	+	843078	843139	0	1	61,	0
chr1	844098	844279	ENSG00000228794.9	0.00032	+	844098	844279	0	1	181,	0
chr1	853808	854019	ENSG00000228794.9	2.8e-10	+	853808	854019	0	1	211,	0
chr1	856177	856628	ENSG00000228794.9	1.9e-08	+	856177	856628	0	1	451,	0
chr1	856747	856808	ENSG00000228794.9	0.0044	+	856747	856808	0	1	61,	0
chr1	856866	856927	ENSG00000228794.9	0.0012	+	856866	856927	0	1	61,	0
chr1	911965	912204	ENSG00000230699.2	6.9e-07	+	911965	912204	0	1	239,	0
chr1	912472	913755	ENSG00000230699.2	1.3e-30	+	912472	913755	0	1	1283,	0
chr1	913814	914023	ENSG00000230699.2	8.3e-05	+	913814	914023	0	1	209,	0
chr1	923927	930213	ENSG00000187634.12	5e-47	+	923927	930213	0	5	1021,40,70,92,59,	0,1222,1803,1994,6227
chr1	942367	944581	ENSG00000187634.12	0	+	942367	944581	0	3	691,125,884,	0,885,1330
chr1	1014091	1014450	ENSG00000187608.10	3.2e-13	+	1014091	1014450	0	1	359,	0
chr1	1046536	1046597	ENSG00000188157.15	0.0019	+	1046536	1046597	0	1	61,	0
chr1	1048166	1048257	ENSG00000188157.15	0.00044	+	1048166	1048257	0	1	91,	0
chr1	1054978	1055758	ENSG00000188157.15	1e-208	+	1054978	1055758	0	1	780,	0
chr1	1055032	1056030	ENSG00000242590.1	1e-185	+	1055032	1056030	0	2	183,133,	0,865
chr1	1232236	1233609	ENSG00000176022.7	1e-66	+	1232236	1233609	0	1	1373,	0
chr1	1233698	1234206	ENSG00000176022.7	6.3e-55	+	1233698	1234206	0	1	508,	0
chr1	1234324	1234981	ENSG00000176022.7	7.9e-57	+	1234324	1234981	0	1	657,	0
chr1	1275279	1279247	ENSG00000230415.1	4.3e-05	+	1275279	1279247	0	2	20,180,	0,3788
chr1	1280614	1280734	ENSG00000162572.20	0.0026	+	1280614	1280734	0	1	120,	0
chr1	1285654	1286065	ENSG00000162572.20	0.00022	+	1285654	1286065	0	2	10,140,	0,271
chr1	1311526	1311677	ENSG00000169972.12	2.6e-07	+	1311526	1311677	0	1	151,	0
chr1	1324785	1324964	ENSG00000224051.7	2.5e-05	+	1324785	1324964	0	1	179,	0
chr1	1327529	1328896	ENSG00000224051.7	1.3e-50	+	1327529	1328896	0	1	1367,	0
chr1	1331889	1332095	ENSG00000169962.5	0.0018	+	1331889	1332095	0	2	49,72,	0,134
chr1	1332423	1332604	ENSG00000169962.5	0.00018	+	1332423	1332604	0	1	181,	0
chr1	1333076	1333817	ENSG00000169962.5	5.2e-05	+	1333076	1333817	0	3	48,121,312,	0,182,429
chr1	1399519	1399817	ENSG00000224870.7	3.3e-07	+	1399519	1399817	0	1	298,	0
chr1	1400173	1400560	ENSG00000224870.7	1.3e-17	+	1400173	1400560	0	1	387,	0
chr1	1400648	1401957	ENSG00000224870.7	4e-77	+	1400648	1401957	0	1	1309,	0
chr1	1437480	1440874	ENSG00000179403.12	3.2e-48	+	1437480	1440874	0	2	4,1794,	0,1600
chr1	1441802	1441863	ENSG00000179403.12	0.0026	+	1441802	1441863	0	1	61,	0
chr1	1442072	1442253	ENSG00000179403.12	0.00058	+	1442072	1442253	0	1	181,	0
chr1	1512180	1512449	ENSG00000197785.13	7.1e-08	+	1512180	1512449	0	1	269,	0
chr1	1575386	1575502	ENSG00000215014.5	2.5e-06	+	1575386	1575502	0	1	116,	0
chr1	1601653	1601803	ENSG00000286989.1	0.00083	+	1601653	1601803	0	1	150,	0
chr1	1615414	1615595	ENSG00000197530.12	3.4e-05	+	1615414	1615595	0	1	181,	0
chr1	1623393	1623603	ENSG00000197530.12	6.3e-11	+	1623393	1623603	0	1	210,	0
chr1	1625081	1625142	ENSG00000197530.12	0.0024	+	1625081	1625142	0	1	61,	0
chr1	1630370	1630460	ENSG00000197530.12	0.00083	+	1630370	1630460	0	1	90,	0
chr1	1672734	1672944	ENSG00000269737.2	3.8e-05	+	1672734	1672944	0	1	210,	0
chr1	2030339	2030400	ENSG00000187730.9	0.00022	+	2030339	2030400	0	1	61,	0
chr1	2184632	2185365	ENSG00000067606.17	2e-33	+	2184632	2185365	0	2	66,444,	0,289
chr1	2228348	2232587	ENSG00000157933.10	1e-156	+	2228348	2232587	0	2	1387,109,	0,4130
chr1	2303087	2303724	ENSG00000157933.10	1.7e-05	+	2303087	2303724	0	3	16,116,79,	0,197,558
chr1	2306118	2306804	ENSG00000157933.10	6.3e-14	+	2306118	2306804	0	2	132,228,	0,458
chr1	2306923	2308419	ENSG00000157933.10	1e-121	+	2306923	2308419	0	1	1496,	0
chr1	2403495	2403616	ENSG00000157916.20	0.00058	+	2403495	2403616	0	1	121,	0
chr1	2404902	2405442	ENSG00000157916.20	5e-13	+	2404902	2405442	0	1	540,	0
chr1	2547076	2547313	ENSG00000272449.2	1e-06	+	2547076	2547313	0	1	237,	0
chr1	3411554	3412364	ENSG00000142611.17	5e-17	+	3411554	3412364	0	1	810,	0
chr1	3433767	3434277	ENSG00000142611.17	1.5e-07	+	3433767	3434277	0	1	510,	0
chr1	3463367	3463487	ENSG00000130762.15	0.00039	+	3463367	3463487	0	1	120,	0
chr1	3628763	3628912	ENSG00000158109.15	8.7e-06	+	3628763	3628912	0	1	149,	0
chr1	3732937	3733836	ENSG00000078900.15	2e-27	+	3732937	3733836	0	1	899,	0
chr1	3734763	3734884	ENSG00000078900.15	0.00083	+	3734763	3734884	0	1	121,	0
chr1	3746459	3747940	ENSG00000162592.10	6.3e-91	+	3746459	3747940	0	2	232,127,	0,1354
chr1	3767346	3769863	ENSG00000162592.10	0.00039	+	3767346	3769863	0	2	99,81,	0,2436
chr1	3857506	3857657	ENSG00000169598.15	0.00022	+	3857506	3857657	0	1	151,	0
chr1	6207575	6207636	ENSG00000158286.13	0.0013	+	6207575	6207636	0	1	61,	0
chr1	6210733	6210884	ENSG00000158286.13	0.0017	+	6210733	6210884	0	1	151,	0
chr1	6238876	6238937	ENSG00000225077.3	0.0055	+	6238876	6238937	0	1	61,	0
chr1	6580546	6581145	ENSG00000204859.13	4e-48	+	6580546	6581145	0	1	599,	0
chr1	6588980	6589280	ENSG00000204859.13	2e-15	+	6588980	6589280	0	1	300,	0
chr1	6619920	6621441	ENSG00000116273.6	3.2e-18	+	6619920	6621441	0	2	417,31,	0,1490
chr1	6621499	6622006	ENSG00000116273.6	1e-53	+	6621499	6622006	0	1	507,	0
chr1	6632766	6633306	ENSG00000041988.15	7.9e-86	+	6632766	6633306	0	1	540,	0
chr1	6634477	6634987	ENSG00000041988.15	2e-19	+	6634477	6634987	0	1	510,	0
chr1	6635046	6635257	ENSG00000041988.15	2.6e-07	+	6635046	6635257	0	1	211,	0
chr1	6635316	6635586	ENSG00000041988.15	1e-147	+	6635316	6635586	0	1	270,	0
chr1	7766474	7766625	ENSG00000171735.19	0.00016	+	7766474	7766625	0	1	151,	0
chr1	7772854	7772914	ENSG00000049245.13	0.0013	+	7772854	7772914	0	1	60,	0
chr1	8005013	8005252	ENSG00000284747.1	1.1e-06	+	8005013	8005252	0	1	239,	0
chr1	9235044	9239912	ENSG00000049239.12	0.00018	+	9235044	9239912	0	2	22,69,	0,4799
chr1	9244936	9246971	ENSG00000049239.12	7.9e-13	+	9244936	9246971	0	2	625,6,	0,2029
chr1	9263604	9264235	ENSG00000049239.12	4e-14	+	9263604	9264235	0	1	631,	0
chr1	9265163	9265343	ENSG00000049239.12	0.00011	+	9265163	9265343	0	1	180,	0
chr1	9266331	9266392	ENSG00000049239.12	0.0058	+	9266331	9266392	0	1	61,	0
chr1	9268969	9269389	ENSG00000049239.12	1.6e-25	+	9268969	9269389	0	1	420,	0
chr1	9270047	9270198	ENSG00000049239.12	0.00056	+	9270047	9270198	0	1	151,	0
chr1	9270647	9270887	ENSG00000049239.12	1.6e-12	+	9270647	9270887	0	1	240,	0
chr1	9355791	9356002	ENSG00000171621.14	2.8e-09	+	9355791	9356002	0	1	211,	0
chr1	9356330	9367853	ENSG00000171621.14	2e-30	+	9356330	9367853	0	2	255,406,	0,11117
chr1	9367942	9368213	ENSG00000171621.14	7.9e-05	+	9367942	9368213	0	1	271,	0
chr1	9601107	9601258	ENSG00000188807.13	7.8e-06	+	9601107	9601258	0	1	151,	0
chr1	9602230	9602411	ENSG00000188807.13	6.3e-12	+	9602230	9602411	0	1	181,	0
chr1	9613049	9613978	ENSG00000188807.13	3.2e-65	+	9613049	9613978	0	1	929,	0
chr1	9726993	9727143	ENSG00000171608.15	1.8e-05	+	9726993	9727143	0	1	150,	0
chr1	9982597	9982748	ENSG00000173614.14	0.00027	+	9982597	9982748	0	1	151,	0
chr1	10033190	10033430	ENSG00000130939.19	3.2e-09	+	10033190	10033430	0	1	240,	0
chr1	10033519	10033580	ENSG00000130939.19	9.1e-05	+	10033519	10033580	0	1	61,	0
chr1	10303444	10303655	ENSG00000054523.17	2e-13	+	10303444	10303655	0	1	211,	0
chr1	10304043	10304824	ENSG00000054523.17	7.9e-22	+	10304043	10304824	0	1	781,	0
chr1	10378784	10378995	ENSG00000054523.17	0.00016	+	10378784	10378995	0	1	211,	0
chr1	10431143	10431294	ENSG00000251503.8	8.3e-06	+	10431143	10431294	0	1	151,	0
chr1	10431149	10431298	ENSG00000175279.22	5.8e-06	+	10431149	10431298	0	1	149,	0
chr1	10450104	10451427	ENSG00000241563.3	1.5e-10	+	10450104	10451427	0	2	218,51,	0,1272
chr1	10629710	10630040	ENSG00000142655.13	1.3e-45	+	10629710	10630040	0	1	330,	0
chr1	10630219	10630309	ENSG00000142655.13	0.0013	+	10630219	10630309	0	1	90,	0
chr1	10639270	10639899	ENSG00000272078.1	4.1e-08	+	10639270	10639899	0	1	629,	0
chr1	10647875	10647936	ENSG00000272078.1	0.0012	+	10647875	10647936	0	1	61,	0
chr1	10653794	10654004	ENSG00000272078.1	7.9e-14	+	10653794	10654004	0	1	210,	0
chr1	11023339	11023669	ENSG00000120948.17	1e-297	+	11023339	11023669	0	1	330,	0
chr1	11023728	11023998	ENSG00000120948.17	6.3e-80	+	11023728	11023998	0	1	270,	0
chr1	11273504	11273654	ENSG00000120942.13	2.1e-05	+	11273504	11273654	0	1	150,	0
chr1	11273833	11273983	ENSG00000120942.13	3.5e-05	+	11273833	11273983	0	1	150,	0
chr1	11285864	11286164	ENSG00000120942.13	4e-21	+	11285864	11286164	0	1	300,	0
chr1	11295002	11295481	ENSG00000120942.13	2e-12	+	11295002	11295481	0	1	479,	0
chr1	11295719	11296049	ENSG00000120942.13	1.9e-08	+	11295719	11296049	0	1	330,	0
chr1	11661802	11661952	ENSG00000132879.14	1e-05	+	11661802	11661952	0	1	150,	0
chr1	11750258	11750377	ENSG00000177674.16	2.4e-06	+	11750258	11750377	0	1	119,	0
chr1	11789285	11789345	ENSG00000215910.7	0.00032	+	11789285	11789345	0	1	60,	0
chr1	11974730	11975418	ENSG00000083444.17	1e-213	+	11974730	11975418	0	1	688,	0
chr1	12011626	12011927	ENSG00000116688.16	1.6e-91	+	12011626	12011927	0	1	301,	0
chr1	12012165	12012316	ENSG00000116688.16	5e-07	+	12012165	12012316	0	1	151,	0
chr1	12012375	12012735	ENSG00000116688.16	1.4e-07	+	12012375	12012735	0	1	360,	0
chr1	12021676	12022109	ENSG00000116691.11	9.8e-05	+	12021676	12022109	0	2	164,15,	0,418
chr1	12276276	12276637	ENSG00000048707.15	5.6e-08	+	12276276	12276637	0	1	361,	0
chr1	12276906	12277147	ENSG00000048707.15	8.3e-05	+	12276906	12277147	0	1	241,	0
chr1	12277655	12277836	ENSG00000048707.15	0.00028	+	12277655	12277836	0	1	181,	0
chr1	12283038	12283159	ENSG00000048707.15	0.00016	+	12283038	12283159	0	1	121,	0
chr1	12508899	12509200	ENSG00000048707.15	3.2e-26	+	12508899	12509200	0	1	301,	0
chr1	13616103	13616253	ENSG00000162493.16	2.8e-08	+	13616103	13616253	0	1	150,	0
chr1	13779368	13779519	ENSG00000116731.22	3.9e-05	+	13779368	13779519	0	1	151,	0
chr1	13779997	13780057	ENSG00000116731.22	0.0019	+	13779997	13780057	0	1	60,	0
chr1	13781852	13782032	ENSG00000116731.22	1.9e-09	+	13781852	13782032	0	1	180,	0
chr1	13782241	13782421	ENSG00000116731.22	1.8e-05	+	13782241	13782421	0	1	180,	0
chr1	13782809	13786912	ENSG00000116731.22	4.1e-07	+	13782809	13786912	0	2	22,398,	0,3705
chr1	15215032	15215122	ENSG00000171729.14	0.00046	+	15215032	15215122	0	1	90,	0
chr1	15219344	15220031	ENSG00000171729.14	7.9e-31	+	15219344	15220031	0	1	687,	0
chr1	15220089	15220329	ENSG00000171729.14	1e-23	+	15220089	15220329	0	1	240,	0
chr1	15428937	15429028	ENSG00000142634.13	0.0003	+	15428937	15429028	0	1	91,	0
chr1	15568097	15568367	ENSG00000116138.13	7.9e-24	+	15568097	15568367	0	1	270,	0
chr1	15660915	15661156	ENSG00000197312.12	2.5e-25	+	15660915	15661156	0	1	241,	0
chr1	15661335	15661396	ENSG00000197312.12	0.00037	+	15661335	15661396	0	1	61,	0
chr1	15661575	15661846	ENSG00000197312.12	3.2e-15	+	15661575	15661846	0	1	271,	0
chr1	15662055	15662236	ENSG00000197312.12	3.8e-07	+	15662055	15662236	0	1	181,	0
chr1	15660914	15661184	ENSG00000215695.1	7.9e-26	+	15660914	15661184	0	1	270,	0
chr1	15661332	15661393	ENSG00000215695.1	0.00069	+	15661332	15661393	0	1	61,	0
chr1	15661572	15661722	ENSG00000215695.1	6e-08	+	15661572	15661722	0	1	150,	0
chr1	15725353	15728087	ENSG00000116786.13	1e-270	+	15725353	15728087	0	3	192,819,9,	0,1660,2725
chr1	15733840	15733960	ENSG00000116786.13	0.00037	+	15733840	15733960	0	1	120,	0
chr1	15734199	15734709	ENSG00000116786.13	3.2e-24	+	15734199	15734709	0	1	510,	0
chr1	15847796	15848006	ENSG00000065526.11	4e-12	+	15847796	15848006	0	1	210,	0
chr1	15872820	15874264	ENSG00000065526.11	1e-129	+	15872820	15874264	0	2	316,763,	0,681
chr1	15874323	15876549	ENSG00000065526.11	1e-177	+	15874323	15876549	0	2	72,348,	0,1878
chr1	15928186	15929116	ENSG00000065526.11	1e-191	+	15928186	15929116	0	1	930,	0
chr1	15929324	15929535	ENSG00000065526.11	3.2e-25	+	15929324	15929535	0	1	211,	0
chr1	15930492	15930823	ENSG00000065526.11	2.5e-15	+	15930492	15930823	0	1	331,	0
chr1	15932079	15932529	ENSG00000065526.11	1.6e-24	+	15932079	15932529	0	1	450,	0
chr1	15932708	15933009	ENSG00000065526.11	1.6e-22	+	15932708	15933009	0	1	301,	0
chr1	15933457	15934117	ENSG00000065526.11	4e-37	+	15933457	15934117	0	1	660,	0
chr1	15934505	15934775	ENSG00000065526.11	6.3e-19	+	15934505	15934775	0	1	270,	0
chr1	15935104	15935674	ENSG00000065526.11	7.9e-61	+	15935104	15935674	0	1	570,	0
chr1	15937168	15937814	ENSG00000065526.11	5e-23	+	15937168	15937814	0	2	477,3,	0,643
chr1	15939407	15940007	ENSG00000065526.11	1e-267	+	15939407	15940007	0	1	600,	0
chr1	16367172	16367784	ENSG00000055070.17	1.1e-07	+	16367172	16367784	0	2	136,74,	0,538
chr1	16395103	16395521	ENSG00000055070.17	1.6e-80	+	16395103	16395521	0	1	418,	0
chr1	16459059	16459300	ENSG00000157191.20	5e-21	+	16459059	16459300	0	1	241,	0
chr1	16459658	16459779	ENSG00000157191.20	0.00054	+	16459658	16459779	0	1	121,	0
chr1	16459897	16460078	ENSG00000157191.20	0.0001	+	16459897	16460078	0	1	181,	0
chr1	16462137	16462287	ENSG00000226029.1	4.7e-08	+	16462137	16462287	0	1	150,	0
chr1	16873159	16873279	ENSG00000228549.4	0.0012	+	16873159	16873279	0	1	120,	0
chr1	17697245	17697575	ENSG00000074964.17	1e-07	+	17697245	17697575	0	1	330,	0
chr1	19258731	19259088	ENSG00000053372.5	1e-227	+	19258731	19259088	0	1	357,	0
chr1	19259978	19260128	ENSG00000053372.5	3.5e-06	+	19259978	19260128	0	1	150,	0
chr1	19312772	19312863	ENSG00000040487.13	0.00025	+	19312772	19312863	0	1	91,	0
chr1	19317840	19325514	ENSG00000040487.13	0.0014	+	19317840	19325514	0	3	1,130,20,	0,6792,7654
chr1	19327705	19327945	ENSG00000040487.13	1.4e-06	+	19327705	19327945	0	1	240,	0
chr1	19328583	19329300	ENSG00000040487.13	2.5e-94	+	19328583	19329300	0	1	717,	0
chr1	19484642	19597023	ENSG00000173436.15	4.3e-09	+	19484642	19597023	0	2	13,47,	0,112334
chr1	19657047	19657378	ENSG00000158747.14	4e-18	+	19657047	19657378	0	1	331,	0
chr1	19608340	19608398	ENSG00000226396.1	0.0015	+	19608340	19608398	0	1	58,	0
chr1	19679320	19679500	ENSG00000158748.4	1.2e-05	+	19679320	19679500	0	1	180,	0
chr1	19679649	19679740	ENSG00000158748.4	0.00093	+	19679649	19679740	0	1	91,	0
chr1	19906902	19907857	ENSG00000169914.6	6.3e-20	+	19906902	19907857	0	2	42,288,	0,667
chr1	20552960	20554930	ENSG00000183114.8	6.3e-84	+	20552960	20554930	0	1	1970,	0
chr1	20648608	20648937	ENSG00000158828.8	1.6e-24	+	20648608	20648937	0	1	329,	0
chr1	20650705	20651034	ENSG00000158828.8	1e-15	+	20650705	20651034	0	1	329,	0
chr1	21822347	21822528	ENSG00000187942.11	2.2e-07	+	21822347	21822528	0	1	181,	0
chr1	21822706	21822767	ENSG00000187942.11	0.00072	+	21822706	21822767	0	1	61,	0
chr1	22030348	22030617	ENSG00000285959.1	6.3e-37	+	22030348	22030617	0	1	269,	0
chr1	22030356	22030745	ENSG00000218510.8	4e-45	+	22030356	22030745	0	1	389,	0
chr1	22030526	22030748	ENSG00000285794.1	1.6e-22	+	22030526	22030748	0	1	222,	0
chr1	22490249	22490310	ENSG00000184677.18	0.0016	+	22490249	22490310	0	1	61,	0
chr1	22511741	22511922	ENSG00000184677.18	6.6e-06	+	22511741	22511922	0	1	181,	0
chr1	22524426	22526962	ENSG00000184677.18	1e-27	+	22524426	22526962	0	2	18,761,	0,1775
chr1	22527770	22528191	ENSG00000184677.18	4e-14	+	22527770	22528191	0	1	421,	0
chr1	22528789	22529419	ENSG00000184677.18	4e-30	+	22528789	22529419	0	1	630,	0
chr1	22576656	22586555	ENSG00000070886.12	1e-11	+	22576656	22586555	0	2	224,76,	0,9823
chr1	22784503	22784863	ENSG00000133216.16	3.2e-17	+	22784503	22784863	0	1	360,	0
chr1	22864933	22865114	ENSG00000133216.16	3.6e-06	+	22864933	22865114	0	1	181,	0
chr1	22908047	22908138	ENSG00000133216.16	0.00016	+	22908047	22908138	0	1	91,	0
chr1	22913565	22914225	ENSG00000133216.16	5e-17	+	22913565	22914225	0	1	660,	0
chr1	22914283	22914524	ENSG00000133216.16	2e-11	+	22914283	22914524	0	1	241,	0
chr1	23751127	23752432	ENSG00000011007.12	2e-90	+	23751127	23752432	0	2	903,26,	0,1279
chr1	23757097	23759843	ENSG00000011007.12	1e-122	+	23757097	23759843	0	2	28,332,	0,2414
chr1	23787428	23787518	ENSG00000057757.10	0.00035	+	23787428	23787518	0	1	90,	0
chr1	24669233	24669533	ENSG00000133226.17	1.9e-06	+	24669233	24669533	0	1	300,	0
chr1	24745411	24745592	ENSG00000169504.15	6e-06	+	24745411	24745592	0	1	181,	0
chr1	25338405	25338558	ENSG00000183726.11	2.2e-05	+	25338405	25338558	0	2	51,99,	0,54
chr1	25458514	25458754	ENSG00000204178.11	4e-07	+	25458514	25458754	0	1	240,	0
chr1	25498952	25499013	ENSG00000204178.11	0.0033	+	25498952	25499013	0	1	61,	0
chr1	25566876	25567777	ENSG00000157978.11	7.9e-63	+	25566876	25567777	0	1	901,	0
chr1	25617707	25617828	ENSG00000117643.14	0.0012	+	25617707	25617828	0	1	121,	0
chr1	25800235	25800295	ENSG00000162430.17	0.00071	+	25800235	25800295	0	1	60,	0
chr1	25815681	25816130	ENSG00000162430.17	4e-34	+	25815681	25816130	0	1	449,	0
chr1	25862834	25863098	ENSG00000236528.1	3.4e-10	+	25862834	25863098	0	1	264,	0
chr1	26122105	26122556	ENSG00000175087.10	4e-16	+	26122105	26122556	0	1	451,	0
chr1	26161907	26162057	ENSG00000197245.6	0.0012	+	26161907	26162057	0	1	150,	0
chr1	26170112	26170493	ENSG00000142684.9	1.2e-07	+	26170112	26170493	0	2	71,76,	0,305
chr1	26170550	26170873	ENSG00000142684.9	0	+	26170550	26170873	0	1	323,	0
chr1	26255202	26255382	ENSG00000130695.15	5.6e-08	+	26255202	26255382	0	1	180,	0
chr1	26277192	26277372	ENSG00000130695.15	1.7e-07	+	26277192	26277372	0	1	180,	0
chr1	26467512	26469237	ENSG00000117682.17	1.3e-47	+	26467512	26469237	0	2	15,346,	0,1379
chr1	26472439	26473286	ENSG00000198830.11	2.5e-44	+	26472439	26473286	0	2	188,81,	0,766
chr1	26574133	26574642	ENSG00000117676.14	6.3e-50	+	26574133	26574642	0	1	509,	0
chr1	26574850	26575000	ENSG00000117676.14	2.6e-08	+	26574850	26575000	0	1	150,	0
chr1	26693595	26727717	ENSG00000117713.20	6.3e-94	+	26693595	26727717	0	3	22,1526,10,	0,2419,34112
chr1	26731181	26731511	ENSG00000117713.20	1.3e-13	+	26731181	26731511	0	1	330,	0
chr1	26774613	26774883	ENSG00000117713.20	4e-20	+	26774613	26774883	0	1	270,	0
chr1	26779047	26780906	ENSG00000117713.20	0	+	26779047	26780906	0	1	1859,	0
chr1	26787651	26787801	ENSG00000060642.10	0.0026	+	26787651	26787801	0	1	150,	0
chr1	26797799	26797889	ENSG00000060642.10	5.9e-05	+	26797799	26797889	0	1	90,	0
chr1	26853884	26854095	ENSG00000204160.12	6.3e-10	+	26853884	26854095	0	1	211,	0
chr1	26924153	26941654	ENSG00000090273.14	6.3e-21	+	26924153	26941654	0	2	13,198,	0,17303
chr1	26999896	26999987	ENSG00000253368.4	0.0028	+	26999896	26999987	0	1	91,	0
chr1	27234631	27234781	ENSG00000142784.16	0.00074	+	27234631	27234781	0	1	150,	0
chr1	27306635	27306696	ENSG00000142784.16	6.9e-05	+	27306635	27306696	0	1	61,	0
chr1	27335474	27335774	ENSG00000186501.14	3.2e-34	+	27335474	27335774	0	1	300,	0
chr1	27847088	27850449	ENSG00000117751.18	5e-27	+	27847088	27850449	0	2	4,357,	0,3004
chr1	27882279	27882846	ENSG00000130775.16	1e-13	+	27882279	27882846	0	1	567,	0
chr1	27885998	27886119	ENSG00000130775.16	0.0026	+	27885998	27886119	0	1	121,	0
chr1	27886386	27886447	ENSG00000130775.16	0.00081	+	27886386	27886447	0	1	61,	0
chr1	27958677	27959067	ENSG00000130768.15	2e-05	+	27958677	27959067	0	1	390,	0
chr1	27966694	27966993	ENSG00000158156.7	3.7e-08	+	27966694	27966993	0	1	299,	0
chr1	27967171	27967500	ENSG00000158156.7	6.6e-10	+	27967171	27967500	0	1	329,	0
chr1	28236108	28236257	ENSG00000130770.18	1.3e-21	+	28236108	28236257	0	1	149,	0
chr1	28280730	28281268	ENSG00000130766.5	1e-110	+	28280730	28281268	0	1	538,	0
chr1	28282042	28282193	ENSG00000130766.5	0.00012	+	28282042	28282193	0	1	151,	0
chr1	28334452	28335016	ENSG00000130772.14	1.6e-48	+	28334452	28335016	0	1	564,	0
chr1	28369731	28407436	ENSG00000204138.13	0.00023	+	28369731	28407436	0	2	94,27,	0,37678
chr1	28466468	28466769	ENSG00000204138.13	4e-40	+	28466468	28466769	0	1	301,	0
chr1	28473710	28474041	ENSG00000204138.13	1e-34	+	28473710	28474041	0	1	331,	0
chr1	28496615	28496886	ENSG00000204138.13	5e-05	+	28496615	28496886	0	1	271,	0
chr1	28538103	28538313	ENSG00000180198.16	1.3e-12	+	28538103	28538313	0	1	210,	0
chr1	28538462	28538941	ENSG00000180198.16	5e-35	+	28538462	28538941	0	1	479,	0
chr1	28714150	28715018	ENSG00000162419.12	7.9e-81	+	28714150	28715018	0	1	868,	0
chr1	28715077	28715406	ENSG00000162419.12	1.6e-20	+	28715077	28715406	0	1	329,	0
chr1	28715465	28715556	ENSG00000162419.12	0.0011	+	28715465	28715556	0	1	91,	0
chr1	28736799	28737079	ENSG00000198492.16	1.6e-07	+	28736799	28737079	0	2	10,140,	0,140
chr1	28742655	28743908	ENSG00000198492.16	0	+	28742655	28743908	0	1	1253,	0
chr1	28768999	28769238	ENSG00000198492.16	2.5e-56	+	28768999	28769238	0	1	239,	0
chr1	28862761	28863840	ENSG00000116329.11	7.9e-19	+	28862761	28863840	0	1	1079,	0
chr1	28864408	28864499	ENSG00000116329.11	0.00018	+	28864408	28864499	0	1	91,	0
chr1	28864737	28865038	ENSG00000116329.11	8.3e-05	+	28864737	28865038	0	1	301,	0
chr1	28869080	28869171	ENSG00000116329.11	0.00027	+	28869080	28869171	0	1	91,	0
chr1	28870637	28870728	ENSG00000116329.11	0.00016	+	28870637	28870728	0	1	91,	0
chr1	28887090	28893431	ENSG00000159023.21	1.4e-05	+	28887090	28893431	0	2	120,61,	0,6280
chr1	28987452	28987783	ENSG00000159023.21	1e-217	+	28987452	28987783	0	1	331,	0
chr1	29119535	29119746	ENSG00000159023.21	2.2e-06	+	29119535	29119746	0	1	211,	0
chr1	29280094	29282689	ENSG00000060656.20	0.00056	+	29280094	29282689	0	2	47,14,	0,2581
chr1	30718980	30719130	ENSG00000186056.10	2.2e-05	+	30718980	30719130	0	1	150,	0
chr1	30719218	30719279	ENSG00000186056.10	0.00059	+	30719218	30719279	0	1	61,	0
chr1	31364125	31364333	ENSG00000121766.15	7.9e-29	+	31364125	31364333	0	1	208,	0
chr1	32102685	32102806	ENSG00000121775.18	0.0023	+	32102685	32102806	0	1	121,	0
chr1	32169927	32170018	ENSG00000025800.14	6.2e-05	+	32169927	32170018	0	1	91,	0
chr1	32170813	32171233	ENSG00000025800.14	1e-263	+	32170813	32171233	0	1	420,	0
chr1	32176143	32176323	ENSG00000025800.14	3.2e-14	+	32176143	32176323	0	1	180,	0
chr1	32170790	32176394	ENSG00000250135.1	1e-262	+	32170790	32176394	0	2	416,19,	0,5585
chr1	32181257	32181527	ENSG00000084652.16	2e-25	+	32181257	32181527	0	1	270,	0
chr1	32194134	32195385	ENSG00000084652.16	1e-162	+	32194134	32195385	0	2	26,484,	0,767
chr1	32200655	32201732	ENSG00000160050.14	0.00059	+	32200655	32201732	0	2	54,37,	0,1040
chr1	32207433	32208329	ENSG00000160051.11	3.2e-40	+	32207433	32208329	0	1	896,	0
chr1	32292082	32292202	ENSG00000116478.12	1.1e-07	+	32292082	32292202	0	1	120,	0
chr1	32362550	32362610	ENSG00000162526.7	0.002	+	32362550	32362610	0	1	60,	0
chr1	32465086	32470865	ENSG00000254553.1	1.6e-12	+	32465086	32470865	0	2	19,282,	0,5497
chr1	32471073	32471434	ENSG00000254553.1	5e-19	+	32471073	32471434	0	1	361,	0
chr1	32485248	32536488	ENSG00000254553.1	5.5e-06	+	32485248	32536488	0	3	84,93,4,	0,50864,51236
chr1	32600132	32600223	ENSG00000254553.1	7.1e-05	+	32600132	32600223	0	1	91,	0
chr1	32465101	32470850	ENSG00000273274.2	3.2e-13	+	32465101	32470850	0	2	4,267,	0,5482
chr1	32471059	32471449	ENSG00000273274.2	2e-18	+	32471059	32471449	0	1	390,	0
chr1	32485264	32485505	ENSG00000273274.2	4e-13	+	32485264	32485505	0	1	241,	0
chr1	32600153	32600214	ENSG00000160062.15	5.1e-05	+	32600153	32600214	0	1	61,	0
chr1	32769964	32770325	ENSG00000162522.11	1.9e-06	+	32769964	32770325	0	1	361,	0
chr1	32771372	32771582	ENSG00000162522.11	5e-08	+	32771372	32771582	0	1	210,	0
chr1	32772061	32773293	ENSG00000162522.11	1.6e-94	+	32772061	32773293	0	2	380,429,	0,803
chr1	32773621	32773742	ENSG00000162522.11	0.0002	+	32773621	32773742	0	1	121,	0
chr1	32826418	32826838	ENSG00000116497.18	6.3e-30	+	32826418	32826838	0	1	420,	0
chr1	33280177	33280327	ENSG00000160094.15	6e-08	+	33280177	33280327	0	1	150,	0
chr1	33281725	33281816	ENSG00000160094.15	0.00074	+	33281725	33281816	0	1	91,	0
chr1	33299012	33299941	ENSG00000160094.15	1e-118	+	33299012	33299941	0	1	929,	0
chr1	33472674	33479582	ENSG00000121903.14	3.2e-15	+	33472674	33479582	0	2	17,404,	0,6504
chr1	33491096	33491697	ENSG00000121903.14	3.2e-17	+	33491096	33491697	0	1	601,	0
chr1	33493295	33493596	ENSG00000121903.14	4e-26	+	33493295	33493596	0	1	301,	0
chr1	33494317	33494438	ENSG00000121903.14	1.8e-05	+	33494317	33494438	0	1	121,	0
chr1	33494887	33494978	ENSG00000121903.14	4.1e-07	+	33494887	33494978	0	1	91,	0
chr1	33495427	33495488	ENSG00000121903.14	0.00042	+	33495427	33495488	0	1	61,	0
chr1	35113794	35114005	ENSG00000197056.11	1.3e-11	+	35113794	35114005	0	1	211,	0
chr1	35114841	35115410	ENSG00000197056.11	5e-20	+	35114841	35115410	0	1	569,	0
chr1	35359147	35359358	ENSG00000146463.11	0.00043	+	35359147	35359358	0	1	211,	0
chr1	35381590	35381741	ENSG00000146463.11	1.9e-06	+	35381590	35381741	0	1	151,	0
chr1	35419568	35419989	ENSG00000146463.11	3.6e-10	+	35419568	35419989	0	1	421,	0
chr1	35557742	35557983	ENSG00000020129.16	6.3e-14	+	35557742	35557983	0	1	241,	0
chr1	35558251	35558462	ENSG00000020129.16	5e-12	+	35558251	35558462	0	1	211,	0
chr1	35560341	35561241	ENSG00000020129.16	2e-85	+	35560341	35561241	0	1	900,	0
chr1	35855794	35855975	ENSG00000134698.11	1.9e-06	+	35855794	35855975	0	1	181,	0
chr1	35919792	35920033	ENSG00000092847.12	3.8e-10	+	35919792	35920033	0	1	241,	0
chr1	36093135	36093755	ENSG00000116863.11	3.2e-43	+	36093135	36093755	0	1	620,	0
chr1	36156168	36156409	ENSG00000116871.15	4.5e-07	+	36156168	36156409	0	1	241,	0
chr1	36171138	36171516	ENSG00000116871.15	2.1e-06	+	36171138	36171516	0	2	177,4,	0,374
chr1	36176735	36177512	ENSG00000116871.15	8.5e-06	+	36176735	36177512	0	2	107,44,	0,733
chr1	36177958	36178199	ENSG00000116871.15	4.5e-09	+	36177958	36178199	0	1	241,	0
chr1	36178527	36179097	ENSG00000116871.15	2.5e-21	+	36178527	36179097	0	1	570,	0
chr1	36286585	36286825	ENSG00000054118.15	1.6e-12	+	36286585	36286825	0	1	240,	0
chr1	36289210	36289510	ENSG00000054118.15	6.3e-45	+	36289210	36289510	0	1	300,	0
chr1	36303833	36304371	ENSG00000054118.15	9.99999998481684e-316	+	36303833	36304371	0	1	538,	0
chr1	36319901	36320021	ENSG00000214193.10	0.00093	+	36319901	36320021	0	1	120,	0
chr1	36320587	36321288	ENSG00000214193.10	4.1e-08	+	36320587	36321288	0	3	211,64,233,	0,327,468
chr1	36321376	36321437	ENSG00000214193.10	0.0018	+	36321376	36321437	0	1	61,	0
chr1	36321764	36323902	ENSG00000214193.10	3.2e-18	+	36321764	36323902	0	3	14,301,133,	0,599,2005
chr1	36324646	36324737	ENSG00000214193.10	0.0012	+	36324646	36324737	0	1	91,	0
chr1	37475675	37475795	ENSG00000163874.11	1.7e-05	+	37475675	37475795	0	1	120,	0
chr1	37483039	37483159	ENSG00000163874.11	0.00071	+	37483039	37483159	0	1	120,	0
chr1	37708323	37708472	ENSG00000134690.11	5e-12	+	37708323	37708472	0	1	149,	0
chr1	37799702	37800599	ENSG00000185090.14	2.5e-74	+	37799702	37800599	0	1	897,	0
chr1	37808138	37808525	ENSG00000197982.14	3.2e-16	+	37808138	37808525	0	1	387,	0
chr1	37809007	37809157	ENSG00000197982.14	1.1e-08	+	37809007	37809157	0	1	150,	0
chr1	39357520	39357761	ENSG00000127603.26	7.6e-06	+	39357520	39357761	0	1	241,	0
chr1	39387405	39387586	ENSG00000127603.26	4.7e-09	+	39387405	39387586	0	1	181,	0
chr1	39388365	39409540	ENSG00000127603.26	6.3e-32	+	39388365	39409540	0	2	293,38,	0,21137
chr1	39409689	39409990	ENSG00000127603.26	1.9e-09	+	39409689	39409990	0	1	301,	0
chr1	39410049	39410440	ENSG00000127603.26	6.3e-39	+	39410049	39410440	0	1	391,	0
chr1	39410859	39410980	ENSG00000127603.26	0.00013	+	39410859	39410980	0	1	121,	0
chr1	39411159	39411760	ENSG00000127603.26	4e-37	+	39411159	39411760	0	1	601,	0
chr1	39411909	39412270	ENSG00000127603.26	8.5e-06	+	39411909	39412270	0	1	361,	0
chr1	39412479	39412900	ENSG00000127603.26	5e-29	+	39412479	39412900	0	1	421,	0
chr1	39413289	39413410	ENSG00000127603.26	5.1e-07	+	39413289	39413410	0	1	121,	0
chr1	39413559	39413650	ENSG00000127603.26	0.00031	+	39413559	39413650	0	1	91,	0
chr1	39527110	39527201	ENSG00000183682.8	0.0013	+	39527110	39527201	0	1	91,	0
chr1	39969698	39969819	ENSG00000168389.17	0.0001	+	39969698	39969819	0	1	121,	0
chr1	40236127	40236248	ENSG00000117000.9	0.00095	+	40236127	40236248	0	1	121,	0
chr1	40239033	40239273	ENSG00000117000.9	2.5e-18	+	40239033	40239273	0	1	240,	0
chr1	40240171	40240532	ENSG00000117000.9	7.9e-34	+	40240171	40240532	0	1	361,	0
chr1	40292505	40292685	ENSG00000084073.9	1e-10	+	40292505	40292685	0	1	180,	0
chr1	40421986	40422136	ENSG00000084070.12	1.1e-05	+	40421986	40422136	0	1	150,	0
chr1	40463001	40463241	ENSG00000187801.15	1.3e-19	+	40463001	40463241	0	1	240,	0
chr1	40514742	40514951	ENSG00000164002.11	7.9e-12	+	40514742	40514951	0	1	209,	0
chr1	40515574	40515664	ENSG00000164002.11	0.0025	+	40515574	40515664	0	1	90,	0
chr1	40770764	40770944	ENSG00000066136.20	8.5e-05	+	40770764	40770944	0	1	180,	0
chr1	41361921	41383081	ENSG00000204060.7	5e-42	+	41361921	41383081	0	2	423,1466,	0,19694
chr1	41383259	41383350	ENSG00000204060.7	0.00012	+	41383259	41383350	0	1	91,	0
chr1	42682417	42682626	ENSG00000065978.19	5e-98	+	42682417	42682626	0	1	209,	0
chr1	42775220	42775520	ENSG00000164008.16	2e-31	+	42775220	42775520	0	1	300,	0
chr1	42775236	42775505	ENSG00000283580.3	3.2e-31	+	42775236	42775505	0	1	269,	0
chr1	42830150	42835121	ENSG00000164010.15	7.9e-32	+	42830150	42835121	0	2	965,84,	0,4887
chr1	42850741	42851190	ENSG00000164011.18	1.3e-31	+	42850741	42851190	0	2	2,268,	0,181
chr1	42851488	42851968	ENSG00000164011.18	1e-87	+	42851488	42851968	0	1	480,	0
chr1	43410157	43410247	ENSG00000198198.16	0.0037	+	43410157	43410247	0	1	90,	0
chr1	43449134	43449195	ENSG00000198198.16	0.0018	+	43449134	43449195	0	1	61,	0
chr1	43449704	43449765	ENSG00000198198.16	0.0033	+	43449704	43449765	0	1	61,	0
chr1	43450408	43451219	ENSG00000198198.16	2.5e-23	+	43450408	43451219	0	1	811,	0
chr1	43451428	43451639	ENSG00000198198.16	3e-08	+	43451428	43451639	0	1	211,	0
chr1	43453586	43453647	ENSG00000198198.16	0.00069	+	43453586	43453647	0	1	61,	0
chr1	43528729	43538256	ENSG00000142949.17	5e-24	+	43528729	43538256	0	3	27,215,59,	0,2146,9468
chr1	43588987	43591816	ENSG00000142949.17	5e-70	+	43588987	43591816	0	3	13,582,5,	0,1984,2824
chr1	43603519	43604106	ENSG00000142949.17	2e-94	+	43603519	43604106	0	2	14,496,	0,91
chr1	43622169	43622230	ENSG00000142949.17	0.003	+	43622169	43622230	0	1	61,	0
chr1	43704498	43704799	ENSG00000066135.13	2e-80	+	43704498	43704799	0	1	301,	0
chr1	43930893	43931014	ENSG00000284989.1	3.9e-08	+	43930893	43931014	0	1	121,	0
chr1	43912815	43913056	ENSG00000126091.20	3.6e-05	+	43912815	43913056	0	1	241,	0
chr1	43930864	43931105	ENSG00000126091.20	1.6e-13	+	43930864	43931105	0	1	241,	0
chr1	43937030	43937210	ENSG00000117407.17	0.00018	+	43937030	43937210	0	1	180,	0
chr1	43946949	43953281	ENSG00000117408.11	1e-154	+	43946949	43953281	0	3	735,782,65,	0,2422,6267
chr1	43972182	43972652	ENSG00000132768.14	6.3e-23	+	43972182	43972652	0	2	152,238,	0,232
chr1	43979449	43979510	ENSG00000117411.16	0.00091	+	43979449	43979510	0	1	61,	0
chr1	43985851	43986121	ENSG00000117411.16	9.3e-07	+	43985851	43986121	0	1	270,	0
chr1	43986180	43990721	ENSG00000117411.16	0	+	43986180	43990721	0	2	26,424,	0,4117
chr1	43990900	43991050	ENSG00000117411.16	5e-11	+	43990900	43991050	0	1	150,	0
chr1	44412412	44412712	ENSG00000187147.18	2e-15	+	44412412	44412712	0	1	300,	0
chr1	45012218	45012774	ENSG00000126088.14	0.00056	+	45012218	45012774	0	2	67,84,	0,472
chr1	45326934	45327319	ENSG00000186603.5	2.8e-08	+	45326934	45327319	0	1	385,	0
chr1	45327555	45327704	ENSG00000186603.5	0.00039	+	45327555	45327704	0	1	149,	0
chr1	45327822	45327971	ENSG00000186603.5	0.0012	+	45327822	45327971	0	1	149,	0
chr1	45343107	45343496	ENSG00000132773.12	7.9e-29	+	45343107	45343496	0	1	389,	0
chr1	45508841	45509140	ENSG00000132763.15	1.2e-07	+	45508841	45509140	0	1	299,	0
chr1	45510424	45510634	ENSG00000132763.15	1.6e-11	+	45510424	45510634	0	1	210,	0
chr1	45607355	45607596	ENSG00000132780.17	2.5e-33	+	45607355	45607596	0	1	241,	0
chr1	45607655	45607836	ENSG00000132780.17	1e-11	+	45607655	45607836	0	1	181,	0
chr1	45608014	45608225	ENSG00000132780.17	5e-55	+	45608014	45608225	0	1	211,	0
chr1	45618633	45618784	ENSG00000132780.17	2.5e-06	+	45618633	45618784	0	1	151,	0
chr1	46034654	46036062	ENSG00000086015.21	1.3e-29	+	46034654	46036062	0	1	1408,	0
chr1	46219735	46220153	ENSG00000171357.6	5e-35	+	46219735	46220153	0	1	418,	0
chr1	46341969	46342060	ENSG00000117481.10	0.0026	+	46341969	46342060	0	1	91,	0
chr1	46361740	46361831	ENSG00000117481.10	3.2e-05	+	46361740	46361831	0	1	91,	0
chr1	46364523	46364673	ENSG00000117481.10	0.00023	+	46364523	46364673	0	1	150,	0
chr1	46512434	46512525	ENSG00000197587.10	7.8e-06	+	46512434	46512525	0	1	91,	0
chr1	47436106	47436167	ENSG00000186564.5	0.0011	+	47436106	47436167	0	1	61,	0
chr1	47436615	47436706	ENSG00000186564.5	7.6e-05	+	47436615	47436706	0	1	91,	0
chr1	47436885	47437066	ENSG00000186564.5	2.8e-08	+	47436885	47437066	0	1	181,	0
chr1	47437934	47438504	ENSG00000186564.5	2.5e-23	+	47437934	47438504	0	1	570,	0
chr1	47438593	47439852	ENSG00000186564.5	6.3e-42	+	47438593	47439852	0	1	1259,	0
chr1	50960774	50968086	ENSG00000123080.12	1e-05	+	50960774	50968086	0	2	29,151,	0,7161
chr1	50968802	50970373	ENSG00000123080.12	3.2e-76	+	50968802	50970373	0	2	1097,129,	0,1442
chr1	50970431	50974246	ENSG00000123080.12	2.5e-56	+	50970431	50974246	0	2	66,354,	0,3461
chr1	51270088	51271323	ENSG00000123091.5	2.1e-10	+	51270088	51271323	0	2	37,173,	0,1062
chr1	52033449	52033508	ENSG00000223390.1	0.0011	+	52033449	52033508	0	1	59,	0
chr1	52238252	52238822	ENSG00000157077.14	2.9e-10	+	52238252	52238822	0	1	570,	0
chr1	52417788	52418028	ENSG00000134748.13	7.9e-33	+	52417788	52418028	0	1	240,	0
chr1	52771131	52771312	ENSG00000162378.13	3.9e-08	+	52771131	52771312	0	1	181,	0
chr1	52771401	52771701	ENSG00000162378.13	1e-13	+	52771401	52771701	0	1	300,	0
chr1	52857115	52857236	ENSG00000203995.9	9.3e-05	+	52857115	52857236	0	1	121,	0
chr1	52857414	52860755	ENSG00000203995.9	6.3e-34	+	52857414	52860755	0	2	335,25,	0,3316
chr1	52893084	52893324	ENSG00000203995.9	1e-65	+	52893084	52893324	0	1	240,	0
chr1	53210149	53210300	ENSG00000157184.7	2.6e-06	+	53210149	53210300	0	1	151,	0
chr1	53210508	53210689	ENSG00000157184.7	4.1e-08	+	53210508	53210689	0	1	181,	0
chr1	53210868	53210988	ENSG00000157184.7	2.2e-05	+	53210868	53210988	0	1	120,	0
chr1	53213897	53214017	ENSG00000157184.7	2.1e-05	+	53213897	53214017	0	1	120,	0
chr1	53952079	53952228	ENSG00000116212.15	5.4e-05	+	53952079	53952228	0	1	149,	0
chr1	54096371	54096821	ENSG00000116205.14	3.2e-28	+	54096371	54096821	0	1	450,	0
chr1	54220909	54225374	ENSG00000116221.15	1.6e-12	+	54220909	54225374	0	2	21,250,	0,4215
chr1	54609591	54609712	ENSG00000162390.17	5.2e-05	+	54609591	54609712	0	1	121,	0
chr1	54741529	54742308	ENSG00000271723.5	0	+	54741529	54742308	0	1	779,	0
chr1	54741523	54742329	ENSG00000243725.7	0	+	54741523	54742329	0	1	806,	0
chr1	54742388	54742478	ENSG00000243725.7	4.9e-05	+	54742388	54742478	0	1	90,	0
chr1	61088360	61088661	ENSG00000162599.17	7.9e-61	+	61088360	61088661	0	1	301,	0
chr1	62444871	62445112	ENSG00000162607.13	1e-177	+	62444871	62445112	0	1	241,	0
chr1	62450544	62450725	ENSG00000162607.13	3.6e-10	+	62450544	62450725	0	1	181,	0
chr1	62816685	62819062	ENSG00000125703.15	2.7e-09	+	62816685	62819062	0	2	123,58,	0,2319
chr1	63323070	63323458	ENSG00000187140.5	2.5e-23	+	63323070	63323458	0	1	388,	0
chr1	63323546	63323935	ENSG00000187140.5	4e-24	+	63323546	63323935	0	1	389,	0
chr1	63324142	63324322	ENSG00000187140.5	0.00044	+	63324142	63324322	0	1	180,	0
chr1	63324380	63324620	ENSG00000187140.5	1.7e-06	+	63324380	63324620	0	1	240,	0
chr1	63593410	63593651	ENSG00000079739.17	1.8e-07	+	63593410	63593651	0	1	241,	0
chr1	63593964	63594084	ENSG00000079739.17	0.00066	+	63593964	63594084	0	1	120,	0
chr1	63659764	63659855	ENSG00000079739.17	1.9e-05	+	63659764	63659855	0	1	91,	0
chr1	64177508	64177809	ENSG00000185483.12	2.8e-05	+	64177508	64177809	0	1	301,	0
chr1	64178647	64179428	ENSG00000185483.12	1.3e-56	+	64178647	64179428	0	1	781,	0
chr1	64691384	64691624	ENSG00000158966.15	3.4e-10	+	64691384	64691624	0	1	240,	0
chr1	64691862	64691923	ENSG00000158966.15	0.0012	+	64691862	64691923	0	1	61,	0
chr1	64692041	64692251	ENSG00000158966.15	1.3e-12	+	64692041	64692251	0	1	210,	0
chr1	64777796	64778066	ENSG00000162437.14	1.3e-54	+	64777796	64778066	0	1	270,	0
chr1	64832902	64833083	ENSG00000162437.14	6.3e-12	+	64832902	64833083	0	1	181,	0
chr1	66372481	66372721	ENSG00000184588.18	1.2e-05	+	66372481	66372721	0	1	240,	0
chr1	66984602	66984903	ENSG00000198160.14	4e-72	+	66984602	66984903	0	1	301,	0
chr1	67685259	67685379	ENSG00000116717.13	0.00065	+	67685259	67685379	0	1	120,	0
chr1	67687741	67688038	ENSG00000116717.13	1e-34	+	67687741	67688038	0	1	297,	0
chr1	70250686	70250867	ENSG00000116754.13	2.5e-11	+	70250686	70250867	0	1	181,	0
chr1	76055809	76055989	ENSG00000230027.2	2.6e-05	+	76055809	76055989	0	1	180,	0
chr1	77888602	77888693	ENSG00000162614.18	0.0016	+	77888602	77888693	0	1	91,	0
chr1	81943155	81943545	ENSG00000117114.19	4e-13	+	81943155	81943545	0	1	390,	0
chr1	81990399	81990999	ENSG00000117114.19	4e-30	+	81990399	81990999	0	1	600,	0
chr1	84078181	84078271	ENSG00000142875.19	4.2e-05	+	84078181	84078271	0	1	90,	0
chr1	85580760	85580910	ENSG00000142871.17	4e-10	+	85580760	85580910	0	1	150,	0
chr1	85583026	85583325	ENSG00000142871.17	2.5e-16	+	85583026	85583325	0	1	299,	0
chr1	86914634	86914815	ENSG00000153936.17	1.7e-06	+	86914634	86914815	0	1	181,	0
chr1	87328879	87329239	ENSG00000143013.13	4e-51	+	87328879	87329239	0	1	360,	0
chr1	87344909	87345180	ENSG00000143013.13	1e-105	+	87344909	87345180	0	1	271,	0
chr1	88833316	88833587	ENSG00000065243.20	2.5e-28	+	88833316	88833587	0	1	271,	0
chr1	89583798	89583949	ENSG00000197147.13	0.00016	+	89583798	89583949	0	1	151,	0
chr1	89584158	89584488	ENSG00000197147.13	2e-12	+	89584158	89584488	0	1	330,	0
chr1	89592858	89593099	ENSG00000197147.13	1e-18	+	89592858	89593099	0	1	241,	0
chr1	89713354	89713595	ENSG00000171488.15	1.3e-14	+	89713354	89713595	0	1	241,	0
chr1	89713714	89713925	ENSG00000171488.15	1e-12	+	89713714	89713925	0	1	211,	0
chr1	89714464	89714674	ENSG00000171488.15	0.00044	+	89714464	89714674	0	1	210,	0
chr1	89714793	89715004	ENSG00000171488.15	1.3e-08	+	89714793	89715004	0	1	211,	0
chr1	89934634	89935084	ENSG00000171492.14	5.5e-09	+	89934634	89935084	0	1	450,	0
chr1	89935292	89935713	ENSG00000171492.14	6.3e-27	+	89935292	89935713	0	1	421,	0
chr1	91524054	91524265	ENSG00000097046.13	1e-11	+	91524054	91524265	0	1	211,	0
chr1	92177014	92177105	ENSG00000189195.13	0.0038	+	92177014	92177105	0	1	91,	0
chr1	92389053	92389173	ENSG00000122484.9	3.6e-05	+	92389053	92389173	0	1	120,	0
chr1	92393277	92393368	ENSG00000122484.9	0.0018	+	92393277	92393368	0	1	91,	0
chr1	92394206	92394326	ENSG00000122484.9	0.00022	+	92394206	92394326	0	1	120,	0
chr1	92395344	92395465	ENSG00000122484.9	0.00032	+	92395344	92395465	0	1	121,	0
chr1	92395734	92395824	ENSG00000122484.9	0.00066	+	92395734	92395824	0	1	90,	0
chr1	93136680	93137100	ENSG00000143033.18	6.3e-23	+	93136680	93137100	0	1	420,	0
chr1	93180397	93180788	ENSG00000122483.17	2.9e-07	+	93180397	93180788	0	1	391,	0
chr1	93346086	93346835	ENSG00000117505.13	5e-47	+	93346086	93346835	0	1	749,	0
chr1	94928079	94928379	ENSG00000235501.6	3.9e-06	+	94928079	94928379	0	1	300,	0
chr1	95244414	95244683	ENSG00000271092.5	2.5e-27	+	95244414	95244683	0	1	269,	0
chr1	95244421	95244689	ENSG00000122481.17	1.6e-27	+	95244421	95244689	0	1	268,	0
chr1	99969470	99969561	ENSG00000117620.15	0.0038	+	99969470	99969561	0	1	91,	0
chr1	101086973	101087064	ENSG00000233184.7	0.00081	+	101086973	101087064	0	1	91,	0
chr1	101239945	101240155	ENSG00000170989.9	0.0019	+	101239945	101240155	0	1	210,	0
chr1	101240213	101240334	ENSG00000170989.9	0.0016	+	101240213	101240334	0	1	121,	0
chr1	103526050	103526171	ENSG00000185946.16	0.0013	+	103526050	103526171	0	1	121,	0
chr1	107056678	107058024	ENSG00000198890.8	1e-165	+	107056678	107058024	0	1	1346,	0
chr1	108699540	108699601	ENSG00000134186.12	0.0025	+	108699540	108699601	0	1	61,	0
chr1	108699840	108700050	ENSG00000134186.12	2e-10	+	108699840	108700050	0	1	210,	0
chr1	108929755	108929995	ENSG00000121957.14	7.9e-23	+	108929755	108929995	0	1	240,	0
chr1	109094602	109094782	ENSG00000215717.6	1e-05	+	109094602	109094782	0	1	180,	0
chr1	109094871	109094931	ENSG00000215717.6	0.002	+	109094871	109094931	0	1	60,	0
chr1	109214663	109215082	ENSG00000031698.13	7.9e-99	+	109214663	109215082	0	1	419,	0
chr1	109237793	109238182	ENSG00000031698.13	2e-53	+	109237793	109238182	0	1	389,	0
chr1	109249538	109250258	ENSG00000143126.8	1.3e-09	+	109249538	109250258	0	1	720,	0
chr1	109250587	109253316	ENSG00000143126.8	2e-25	+	109250587	109253316	0	1	2729,	0
chr1	109258567	109258777	ENSG00000143126.8	1.1e-05	+	109258567	109258777	0	1	210,	0
chr1	109258866	109259047	ENSG00000143126.8	6.3e-05	+	109258866	109259047	0	1	181,	0
chr1	109274341	109274822	ENSG00000143126.8	1.3e-94	+	109274341	109274822	0	1	481,	0
chr1	109491186	109491665	ENSG00000162650.16	2.5e-43	+	109491186	109491665	0	1	479,	0
chr1	109495929	109496169	ENSG00000174151.14	5.2e-05	+	109495929	109496169	0	1	240,	0
chr1	109592411	109592622	ENSG00000065135.11	7.9e-22	+	109592411	109592622	0	1	211,	0
chr1	109923260	109923769	ENSG00000184371.14	2e-13	+	109923260	109923769	0	1	509,	0
chr1	109923858	109926071	ENSG00000184371.14	3.9e-05	+	109923858	109926071	0	4	332,53,56,9,	0,917,1288,2204
chr1	109928866	109930154	ENSG00000184371.14	2e-43	+	109928866	109930154	0	1	1288,	0
chr1	110053690	110054020	ENSG00000143093.15	1.6e-69	+	110053690	110054020	0	1	330,	0
chr1	110211342	110219721	ENSG00000116396.14	6.3e-37	+	110211342	110219721	0	2	835,6,	0,8373
chr1	110223049	110224009	ENSG00000116396.14	4e-60	+	110223049	110224009	0	1	960,	0
chr1	110232970	110233121	ENSG00000116396.14	5.1e-07	+	110232970	110233121	0	1	151,	0
chr1	110338655	110338865	ENSG00000162775.16	4.8e-07	+	110338655	110338865	0	1	210,	0
chr1	110339523	110340661	ENSG00000162775.16	1.6e-96	+	110339523	110340661	0	1	1138,	0
chr1	110340720	110342277	ENSG00000162775.16	1e-196	+	110340720	110342277	0	1	1557,	0
chr1	110347295	110347446	ENSG00000224699.9	0.00056	+	110347295	110347446	0	1	151,	0
chr1	110347535	110347746	ENSG00000224699.9	1.3e-11	+	110347535	110347746	0	1	211,	0
chr1	110407553	110407794	ENSG00000224699.9	1e-19	+	110407553	110407794	0	1	241,	0
chr1	110408093	110408184	ENSG00000224699.9	0.0026	+	110408093	110408184	0	1	91,	0
chr1	111478273	111478423	ENSG00000143110.11	0.00027	+	111478273	111478423	0	1	150,	0
chr1	111619813	111627557	ENSG00000116473.14	3e-06	+	111619813	111627557	0	2	121,89,	0,7655
chr1	111765939	111767104	ENSG00000064703.12	5e-34	+	111765939	111767104	0	1	1165,	0
chr1	112456013	112456733	ENSG00000143079.15	3e-08	+	112456013	112456733	0	1	720,	0
chr1	112457212	112457392	ENSG00000143079.15	3.5e-09	+	112457212	112457392	0	1	180,	0
chr1	112520457	112520578	ENSG00000134245.18	0.0019	+	112520457	112520578	0	1	121,	0
chr1	112674836	112674897	ENSG00000155363.18	6.8e-05	+	112674836	112674897	0	1	61,	0
chr1	112700655	112700746	ENSG00000155363.18	6.9e-08	+	112700655	112700746	0	1	91,	0
chr1	112956504	112957314	ENSG00000226419.8	1e-48	+	112956504	112957314	0	1	810,	0
chr1	112968339	112968490	ENSG00000226419.8	0.00093	+	112968339	112968490	0	1	151,	0
chr1	112968609	112968760	ENSG00000226419.8	1.1e-07	+	112968609	112968760	0	1	151,	0
chr1	113123928	113124259	ENSG00000198799.12	6.3e-40	+	113123928	113124259	0	1	331,	0
chr1	113390634	113390874	ENSG00000081026.19	7.1e-07	+	113390634	113390874	0	1	240,	0
chr1	113642007	113642368	ENSG00000081026.19	1.6e-57	+	113642007	113642368	0	1	361,	0
chr1	113683647	113683977	ENSG00000081026.19	2e-22	+	113683647	113683977	0	1	330,	0
chr1	113911417	113912437	ENSG00000118655.7	2.5e-54	+	113911417	113912437	0	1	1020,	0
chr1	113940383	113940624	ENSG00000163349.22	5e-25	+	113940383	113940624	0	1	241,	0
chr1	113940743	113941193	ENSG00000163349.22	6.3e-34	+	113940743	113941193	0	1	450,	0
chr1	115663693	115663874	ENSG00000173218.15	7.9e-12	+	115663693	115663874	0	1	181,	0
chr1	115685475	115691725	ENSG00000173218.15	2e-34	+	115685475	115691725	0	2	52,607,	0,5643
chr1	116910184	116941946	ENSG00000134247.10	1.8e-07	+	116910184	116941946	0	2	68,232,	0,31530
chr1	116949416	116961655	ENSG00000134247.10	1e-125	+	116949416	116961655	0	2	156,413,	0,11826
chr1	116967046	116967196	ENSG00000134247.10	1.2e-05	+	116967046	116967196	0	1	150,	0
chr1	116986854	116987154	ENSG00000134247.10	1.3e-82	+	116986854	116987154	0	1	300,	0
chr1	117025613	117025734	ENSG00000134256.12	0.0019	+	117025613	117025734	0	1	121,	0
chr1	117075098	117075309	ENSG00000116830.12	7.9e-20	+	117075098	117075309	0	1	211,	0
chr1	117367448	117367658	ENSG00000198162.12	4.3e-05	+	117367448	117367658	0	1	210,	0
chr1	117367957	117368347	ENSG00000198162.12	2.5e-18	+	117367957	117368347	0	1	390,	0
chr1	117522916	117523186	ENSG00000198162.12	4e-17	+	117522916	117523186	0	1	270,	0
chr1	117623064	117623244	ENSG00000183508.5	2.1e-06	+	117623064	117623244	0	1	180,	0
chr1	117623393	117624232	ENSG00000183508.5	3.2e-26	+	117623393	117624232	0	1	839,	0
chr1	117959382	117959503	ENSG00000065183.16	5.6e-07	+	117959382	117959503	0	1	121,	0
chr1	119179007	119179187	ENSG00000231365.6	7.1e-06	+	119179007	119179187	0	1	180,	0
chr1	119179306	119179547	ENSG00000231365.6	2.8e-07	+	119179306	119179547	0	1	241,	0
chr1	119180204	119180535	ENSG00000231365.6	6.3e-29	+	119180204	119180535	0	1	331,	0
chr1	119182959	119183140	ENSG00000231365.6	5.5e-07	+	119182959	119183140	0	1	181,	0
chr1	119711810	119711871	ENSG00000092621.12	1e-13	+	119711810	119711871	0	1	61,	0
chr1	120952739	120952889	ENSG00000226067.7	2.5e-06	+	120952739	120952889	0	1	150,	0
chr1	121184929	121185413	ENSG00000171943.11	1.9e-06	+	121184929	121185413	0	2	195,46,	0,438
chr1	121387848	121387999	ENSG00000171943.11	5.8e-05	+	121387848	121387999	0	1	151,	0
chr1	145670260	145670471	ENSG00000117262.19	4e-11	+	145670260	145670471	0	1	211,	0
chr1	145846532	145846622	ENSG00000186364.12	0.0015	+	145846532	145846622	0	1	90,	0
chr1	145961445	145964422	ENSG00000278431.1	2.4e-07	+	145961445	145964422	0	2	128,48,	0,2929
chr1	146058742	146058863	ENSG00000233396.8	0.00027	+	146058742	146058863	0	1	121,	0
chr1	146994436	146994556	ENSG00000268043.7	0.00039	+	146994436	146994556	0	1	120,	0
chr1	147618915	147619692	ENSG00000116128.11	1.3e-32	+	147618915	147619692	0	1	777,	0
chr1	147620318	147620707	ENSG00000116128.11	5e-21	+	147620318	147620707	0	1	389,	0
chr1	147620855	147620976	ENSG00000116128.11	0.00071	+	147620855	147620976	0	1	121,	0
chr1	147623976	147624186	ENSG00000116128.11	6.9e-10	+	147623976	147624186	0	1	210,	0
chr1	147624394	147625201	ENSG00000116128.11	3.2e-67	+	147624394	147625201	0	1	807,	0
chr1	147993161	147993312	ENSG00000188092.14	1.6e-05	+	147993161	147993312	0	1	151,	0
chr1	148458960	148459078	ENSG00000280649.2	0.00039	+	148458960	148459078	0	1	118,	0
chr1	148459282	148459693	ENSG00000280649.2	2.7e-10	+	148459282	148459693	0	1	411,	0
chr1	148952407	148952528	ENSG00000178104.19	2.9e-05	+	148952407	148952528	0	1	121,	0
chr1	148953037	148953277	ENSG00000178104.19	4e-27	+	148953037	148953277	0	1	240,	0
chr1	148953456	148953667	ENSG00000178104.19	1.6e-12	+	148953456	148953667	0	1	211,	0
chr1	148981451	148981662	ENSG00000178104.19	9.8e-09	+	148981451	148981662	0	1	211,	0
chr1	149553859	149554592	ENSG00000286185.1	0.00059	+	149553859	149554592	0	2	23,98,	0,635
chr1	149554831	149555042	ENSG00000286185.1	2.5e-05	+	149554831	149555042	0	1	211,	0
chr1	149553860	149554593	ENSG00000271383.7	0.00059	+	149553860	149554593	0	2	22,99,	0,634
chr1	149554832	149555043	ENSG00000271383.7	3.3e-05	+	149554832	149555043	0	1	211,	0
chr1	149607493	149636548	ENSG00000277147.6	0.00011	+	149607493	149636548	0	2	61,60,	0,28995
chr1	149646909	149647060	ENSG00000277147.6	0.0011	+	149646909	149647060	0	1	151,	0
chr1	149607494	149608516	ENSG00000284964.1	0.0012	+	149607494	149608516	0	2	60,55,	0,967
chr1	149900022	149900619	ENSG00000178096.9	2e-67	+	149900022	149900619	0	1	597,	0
chr1	150067547	150067608	ENSG00000136631.15	0.0024	+	150067547	150067608	0	1	61,	0
chr1	150149782	150150152	ENSG00000023902.14	1e-08	+	150149782	150150152	0	2	4,237,	0,133
chr1	150157473	150159706	ENSG00000023902.14	0	+	150157473	150159706	0	2	13,888,	0,1345
chr1	150293979	150294099	ENSG00000266472.5	0.00085	+	150293979	150294099	0	1	120,	0
chr1	150470700	150470881	ENSG00000163125.15	2.6e-09	+	150470700	150470881	0	1	181,	0
chr1	150471030	150471270	ENSG00000163125.15	1.3e-32	+	150471030	150471270	0	1	240,	0
chr1	150471538	150471958	ENSG00000163125.15	7.9e-51	+	150471538	150471958	0	1	420,	0
chr1	150472047	150473454	ENSG00000163125.15	1e-113	+	150472047	150473454	0	1	1407,	0
chr1	150506919	150507399	ENSG00000143374.17	1e-182	+	150506919	150507399	0	1	480,	0
chr1	150950689	150950930	ENSG00000143379.12	7.9e-26	+	150950689	150950930	0	1	241,	0
chr1	150960562	150961377	ENSG00000143379.12	1e-154	+	150960562	150961377	0	2	629,61,	0,754
chr1	151033926	151034612	ENSG00000143363.17	2.5e-51	+	151033926	151034612	0	1	686,	0
chr1	151048575	151048696	ENSG00000143443.9	7.1e-05	+	151048575	151048696	0	1	121,	0
chr1	151067358	151067508	ENSG00000213190.3	0.00016	+	151067358	151067508	0	1	150,	0
chr1	151118059	151118299	ENSG00000143458.12	4e-15	+	151118059	151118299	0	1	240,	0
chr1	151198097	151198710	ENSG00000143398.20	9.3e-05	+	151198097	151198710	0	2	20,160,	0,453
chr1	151198799	151198890	ENSG00000143398.20	0.00013	+	151198799	151198890	0	1	91,	0
chr1	151233361	151233675	ENSG00000143398.20	0.00043	+	151233361	151233675	0	2	37,54,	0,260
chr1	151233763	151234385	ENSG00000143398.20	8.3e-10	+	151233763	151234385	0	2	21,189,	0,433
chr1	151248072	151248372	ENSG00000143398.20	1.6e-84	+	151248072	151248372	0	1	300,	0
chr1	151267268	151267479	ENSG00000159352.15	2e-28	+	151267268	151267479	0	1	211,	0
chr1	151281797	151285265	ENSG00000143373.18	5e-42	+	151281797	151285265	0	3	282,108,60,	0,490,3408
chr1	151286073	151288553	ENSG00000143373.18	1e-139	+	151286073	151288553	0	3	1,2132,26,	0,201,2454
chr1	151289479	151290007	ENSG00000143373.18	5.9e-06	+	151289479	151290007	0	2	61,330,	0,198
chr1	151291456	151291756	ENSG00000143373.18	5e-19	+	151291456	151291756	0	1	300,	0
chr1	151518658	151518779	ENSG00000143375.15	0.00047	+	151518658	151518779	0	1	121,	0
chr1	151518987	151519317	ENSG00000143375.15	5e-14	+	151518987	151519317	0	1	330,	0
chr1	151530511	151530721	ENSG00000143375.15	1e-05	+	151530511	151530721	0	1	210,	0
chr1	151537464	151537614	ENSG00000143375.15	9.3e-06	+	151537464	151537614	0	1	150,	0
chr1	151581644	151581973	ENSG00000143367.16	6.3e-12	+	151581644	151581973	0	1	329,	0
chr1	153629090	153629241	ENSG00000160678.11	0.00091	+	153629090	153629241	0	1	151,	0
chr1	153631558	153631649	ENSG00000160678.11	0.00024	+	153631558	153631649	0	1	91,	0
chr1	153634071	153634251	ENSG00000160679.13	2.3e-07	+	153634071	153634251	0	1	180,	0
chr1	153643234	153643414	ENSG00000160679.13	0.00015	+	153643234	153643414	0	1	180,	0
chr1	153644371	153645498	ENSG00000160679.13	1e-266	+	153644371	153645498	0	2	14,435,	0,692
chr1	153661265	153661385	ENSG00000143553.10	3.2e-08	+	153661265	153661385	0	1	120,	0
chr1	153728649	153728710	ENSG00000143624.14	0.00095	+	153728649	153728710	0	1	61,	0
chr1	153773077	153773249	ENSG00000143624.14	0.00011	+	153773077	153773249	0	2	4,57,	0,115
chr1	153773577	153773698	ENSG00000143624.14	5.8e-09	+	153773577	153773698	0	1	121,	0
chr1	153775519	153776267	ENSG00000143554.14	7.9e-23	+	153775519	153776267	0	1	748,	0
chr1	153977801	153977861	ENSG00000272654.1	0.0012	+	153977801	153977861	0	1	60,	0
chr1	153978067	153978186	ENSG00000272654.1	0.00038	+	153978067	153978186	0	1	119,	0
chr1	154272990	154273200	ENSG00000143575.14	1e-14	+	154272990	154273200	0	1	210,	0
chr1	154325552	154327836	ENSG00000143515.17	2e-49	+	154325552	154327836	0	2	150,90,	0,2194
chr1	154349002	154349660	ENSG00000143515.17	1e-209	+	154349002	154349660	0	1	658,	0
chr1	154465237	154465836	ENSG00000160712.13	2e-17	+	154465237	154465836	0	1	599,	0
chr1	154961824	154962534	ENSG00000271380.1	1e-38	+	154961824	154962534	0	1	710,	0
chr1	154983337	154983488	ENSG00000160688.19	0.00028	+	154983337	154983488	0	1	151,	0
chr1	154983997	154987487	ENSG00000160688.19	0.00011	+	154983997	154987487	0	2	69,22,	0,3468
chr1	154987546	154988896	ENSG00000160688.19	1e-134	+	154987546	154988896	0	1	1350,	0
chr1	155002629	155010303	ENSG00000160685.13	1e-28	+	155002629	155010303	0	2	314,46,	0,7628
chr1	155014651	155016909	ENSG00000160685.13	1e-298	+	155014651	155016909	0	2	1163,690,	0,1568
chr1	155017027	155017237	ENSG00000160685.13	1.9e-10	+	155017027	155017237	0	1	210,	0
chr1	155018222	155018373	ENSG00000160685.13	6.2e-05	+	155018222	155018373	0	1	151,	0
chr1	155050947	155051068	ENSG00000143537.13	0.00032	+	155050947	155051068	0	1	121,	0
chr1	155069044	155069403	ENSG00000243364.8	7.9e-11	+	155069044	155069403	0	1	359,	0
chr1	155133979	155134039	ENSG00000169242.12	0.00016	+	155133979	155134039	0	1	60,	0
chr1	155134394	155134484	ENSG00000169242.12	0.00037	+	155134394	155134484	0	1	90,	0
chr1	155138346	155138497	ENSG00000169241.19	2.6e-10	+	155138346	155138497	0	1	151,	0
chr1	155209026	155209146	ENSG00000173171.14	2e-05	+	155209026	155209146	0	1	120,	0
chr1	155282631	155282811	ENSG00000143630.10	4.6e-06	+	155282631	155282811	0	1	180,	0
chr1	155287876	155288534	ENSG00000143630.10	6.5e-09	+	155287876	155288534	0	1	658,	0
chr1	155324471	155324652	ENSG00000160753.16	9.5e-08	+	155324471	155324652	0	1	181,	0
chr1	155326619	155326860	ENSG00000160753.16	1e-13	+	155326619	155326860	0	1	241,	0
chr1	155562277	155563679	ENSG00000235919.4	1e-118	+	155562277	155563679	0	2	9,699,	0,703
chr1	155614339	155614758	ENSG00000125459.15	7.9e-53	+	155614339	155614758	0	1	419,	0
chr1	155689145	155689236	ENSG00000132676.16	0.00011	+	155689145	155689236	0	1	91,	0
chr1	155738200	155738500	ENSG00000132676.16	5e-66	+	155738200	155738500	0	1	300,	0
chr1	156055297	156055538	ENSG00000116586.11	1.6e-14	+	156055297	156055538	0	1	241,	0
chr1	156058419	156058510	ENSG00000116586.11	1.8e-08	+	156058419	156058510	0	1	91,	0
chr1	156114673	156114914	ENSG00000160789.20	2.5e-20	+	156114673	156114914	0	1	241,	0
chr1	156136959	156137140	ENSG00000160789.20	2.1e-06	+	156136959	156137140	0	1	181,	0
chr1	156194140	156194231	ENSG00000160785.13	0.00028	+	156194140	156194231	0	1	91,	0
chr1	156200191	156200432	ENSG00000160785.13	3.2e-54	+	156200191	156200432	0	1	241,	0
chr1	156210344	156210704	ENSG00000160785.13	4e-25	+	156210344	156210704	0	1	360,	0
chr1	156212526	156212766	ENSG00000160785.13	4e-13	+	156212526	156212766	0	1	240,	0
chr1	156284331	156284391	ENSG00000163472.19	0.00027	+	156284331	156284391	0	1	60,	0
chr1	156291504	156292189	ENSG00000163472.19	1.6e-50	+	156291504	156292189	0	1	685,	0
chr1	156292426	156292977	ENSG00000163472.19	2.2e-07	+	156292426	156292977	0	2	17,251,	0,300
chr1	156625248	156625695	ENSG00000132702.13	2.7e-06	+	156625248	156625695	0	1	447,	0
chr1	156728531	156732246	ENSG00000143303.12	4e-70	+	156728531	156732246	0	3	684,47,256,	0,984,3459
chr1	156734311	156735649	ENSG00000143303.12	8.1e-09	+	156734311	156735649	0	2	182,28,	0,1310
chr1	156768220	156787050	ENSG00000143294.15	1e-186	+	156768220	156787050	0	3	19,48,443,	0,14061,18387
chr1	156797303	156800665	ENSG00000143294.15	2.6e-08	+	156797303	156800665	0	2	38,292,	0,3070
chr1	158094754	158095234	ENSG00000183853.18	1.6e-23	+	158094754	158095234	0	1	480,	0
chr1	158095413	158095623	ENSG00000183853.18	1.3e-08	+	158095413	158095623	0	1	210,	0
chr1	158184569	158184807	ENSG00000158473.6	1e-07	+	158184569	158184807	0	1	238,	0
chr1	160262432	160262582	ENSG00000228606.3	0.0022	+	160262432	160262582	0	1	150,	0
chr1	160343345	160343406	ENSG00000162736.17	3.9e-05	+	160343345	160343406	0	1	61,	0
chr1	160356949	160357010	ENSG00000162736.17	0.0013	+	160356949	160357010	0	1	61,	0
chr1	160370735	160370914	ENSG00000171786.6	5.1e-07	+	160370735	160370914	0	1	179,	0
chr1	160419091	160419211	ENSG00000162738.6	5.1e-05	+	160419091	160419211	0	1	120,	0
chr1	160424276	160425440	ENSG00000162738.6	6.3e-13	+	160424276	160425440	0	2	7,323,	0,841
chr1	161118294	161118415	ENSG00000158793.14	0.00034	+	161118294	161118415	0	1	121,	0
chr1	161120708	161120978	ENSG00000158793.14	1e-18	+	161120708	161120978	0	1	270,	0
chr1	161124190	161124310	ENSG00000158793.14	0.00017	+	161124190	161124310	0	1	120,	0
chr1	161158585	161158766	ENSG00000143222.12	2.5e-13	+	161158585	161158766	0	1	181,	0
chr1	161160720	161161109	ENSG00000143258.16	2e-16	+	161160720	161161109	0	1	389,	0
chr1	161229070	161229400	ENSG00000158882.15	2.5e-34	+	161229070	161229400	0	1	330,	0
chr1	161230237	161230746	ENSG00000158882.15	1e-123	+	161230237	161230746	0	1	509,	0
chr1	161362740	161362921	ENSG00000143252.14	6.5e-07	+	161362740	161362921	0	1	181,	0
chr1	161400145	161400443	ENSG00000288093.1	2.6e-05	+	161400145	161400443	0	1	298,	0
chr1	161401155	161401245	ENSG00000288093.1	0.00031	+	161401155	161401245	0	1	90,	0
chr1	161525195	161525255	ENSG00000173110.8	0.0012	+	161525195	161525255	0	1	60,	0
chr1	161526029	161526089	ENSG00000173110.8	0.0026	+	161526029	161526089	0	1	60,	0
chr1	161958598	161958808	ENSG00000118217.6	4e-52	+	161958598	161958808	0	1	210,	0
chr1	162383846	162384087	ENSG00000239887.6	1.1e-05	+	162383846	162384087	0	1	241,	0
chr1	162384625	162384716	ENSG00000239887.6	0.0002	+	162384625	162384716	0	1	91,	0
chr1	162566055	162566266	ENSG00000117143.13	1e-12	+	162566055	162566266	0	1	211,	0
chr1	162780237	162780478	ENSG00000162733.18	5e-31	+	162780237	162780478	0	1	241,	0
chr1	162783386	162783507	ENSG00000162733.18	0.0021	+	162783386	162783507	0	1	121,	0
chr1	164559737	164560008	ENSG00000185630.18	6.3e-16	+	164559737	164560008	0	1	271,	0
chr1	165769286	165769347	ENSG00000224358.1	0.0013	+	165769286	165769347	0	1	61,	0
chr1	165907961	165908112	ENSG00000143179.16	1.3e-12	+	165907961	165908112	0	1	151,	0
chr1	166849154	166850533	ENSG00000143157.11	4e-75	+	166849154	166850533	0	1	1379,	0
chr1	166852689	166853019	ENSG00000143157.11	7.9e-20	+	166852689	166853019	0	1	330,	0
chr1	167415539	167416259	ENSG00000143190.23	1e-149	+	167415539	167416259	0	1	720,	0
chr1	167721720	167722014	ENSG00000197965.12	1.2e-05	+	167721720	167722014	0	2	30,151,	0,143
chr1	168225967	168229607	ENSG00000213064.10	0.00016	+	168225967	168229607	0	2	175,6,	0,3634
chr1	168242524	168243065	ENSG00000213064.10	7.9e-19	+	168242524	168243065	0	1	541,	0
chr1	169487033	169487094	ENSG00000213062.5	0.0026	+	169487033	169487094	0	1	61,	0
chr1	169487842	169488023	ENSG00000213062.5	0.00083	+	169487842	169488023	0	1	181,	0
chr1	171532517	171532907	ENSG00000117523.16	1e-117	+	171532517	171532907	0	1	390,	0
chr1	171540662	171541562	ENSG00000117523.16	1e-237	+	171540662	171541562	0	1	900,	0
chr1	171541831	171542072	ENSG00000117523.16	3.2e-43	+	171541831	171542072	0	1	241,	0
chr1	171557735	171557976	ENSG00000117523.16	1e-19	+	171557735	171557976	0	1	241,	0
chr1	171591652	171592013	ENSG00000117523.16	1e-142	+	171591652	171592013	0	1	361,	0
chr1	171782048	171784057	ENSG00000010165.20	5.4e-10	+	171782048	171784057	0	2	72,318,	0,1691
chr1	171784295	171785885	ENSG00000010165.20	1.6e-16	+	171784295	171785885	0	2	204,7,	0,1583
chr1	171796489	171796909	ENSG00000010165.20	1e-123	+	171796489	171796909	0	1	420,	0
chr1	172610008	172610368	ENSG00000094975.14	4e-30	+	172610008	172610368	0	1	360,	0
chr1	173733995	173734205	ENSG00000076321.11	7.6e-08	+	173733995	173734205	0	1	210,	0
chr1	173824861	173825281	ENSG00000117593.12	7.9e-51	+	173824861	173825281	0	1	420,	0
chr1	173870855	173871036	ENSG00000185278.15	4.4e-07	+	173870855	173871036	0	1	181,	0
chr1	173886244	173886455	ENSG00000185278.15	0.0012	+	173886244	173886455	0	1	211,	0
chr1	173894551	173894672	ENSG00000185278.15	0.0012	+	173894551	173894672	0	1	121,	0
chr1	174988750	174989941	ENSG00000152061.23	0.00081	+	174988750	174989941	0	2	88,93,	0,1098
chr1	178457778	178457929	ENSG00000075391.16	2.9e-05	+	178457778	178457929	0	1	151,	0
chr1	178458138	178458379	ENSG00000075391.16	1e-11	+	178458138	178458379	0	1	241,	0
chr1	178473141	178473232	ENSG00000075391.16	0.00032	+	178473141	178473232	0	1	91,	0
chr1	178542840	178544890	ENSG00000213057.5	0.0038	+	178542840	178544890	0	2	45,16,	0,2034
chr1	178545312	178545641	ENSG00000213057.5	5.1e-07	+	178545312	178545641	0	1	329,	0
chr1	178906830	178916713	ENSG00000116191.17	1.3e-19	+	178906830	178916713	0	2	37,384,	0,9499
chr1	179043963	179044083	ENSG00000116199.12	0.0001	+	179043963	179044083	0	1	120,	0
chr1	179071957	179072557	ENSG00000116199.12	4e-71	+	179071957	179072557	0	1	600,	0
chr1	179088048	179088109	ENSG00000186283.14	0.0041	+	179088048	179088109	0	1	61,	0
chr1	179095117	179095446	ENSG00000186283.14	1e-211	+	179095117	179095446	0	1	329,	0
chr1	179353650	179353951	ENSG00000057252.13	7.9e-13	+	179353650	179353951	0	1	301,	0
chr1	179882311	179882371	ENSG00000143337.18	0.0026	+	179882311	179882371	0	1	60,	0
chr1	179917751	179918231	ENSG00000143337.18	2.5e-22	+	179917751	179918231	0	1	480,	0
chr1	179996823	179997033	ENSG00000135837.16	2.4e-08	+	179996823	179997033	0	1	210,	0
chr1	180020297	180020388	ENSG00000135837.16	4.7e-05	+	180020297	180020388	0	1	91,	0
chr1	180020626	180020747	ENSG00000135837.16	1.8e-05	+	180020626	180020747	0	1	121,	0
chr1	180093951	180094072	ENSG00000135837.16	2.2e-05	+	180093951	180094072	0	1	121,	0
chr1	180111189	180111400	ENSG00000135837.16	2e-14	+	180111189	180111400	0	1	211,	0
chr1	179969241	179969301	ENSG00000235145.2	0.00081	+	179969241	179969301	0	1	60,	0
chr1	180194351	180196999	ENSG00000116260.17	7.9e-26	+	180194351	180196999	0	2	41,738,	0,1910
chr1	180197417	180197687	ENSG00000116260.17	1.6e-15	+	180197417	180197687	0	1	270,	0
chr1	180198225	180198285	ENSG00000116260.17	0.0026	+	180198225	180198285	0	1	60,	0
chr1	180266505	180271381	ENSG00000121454.6	7.6e-05	+	180266505	180271381	0	2	89,2,	0,4874
chr1	180271980	180274428	ENSG00000121454.6	9.8e-09	+	180271980	180274428	0	2	26,244,	0,2204
chr1	180274877	180275028	ENSG00000121454.6	3.6e-06	+	180274877	180275028	0	1	151,	0
chr1	180632033	180632124	ENSG00000143324.13	0.0028	+	180632033	180632124	0	1	91,	0
chr1	180884285	180884526	ENSG00000143324.13	5e-26	+	180884285	180884526	0	1	241,	0
chr1	180935452	180935542	ENSG00000135835.12	0.00016	+	180935452	180935542	0	1	90,	0
chr1	181055346	181055737	ENSG00000153029.14	1.6e-15	+	181055346	181055737	0	1	391,	0
chr1	181088711	181090596	ENSG00000162783.10	1e-213	+	181088711	181090596	0	1	1885,	0
chr1	183023419	183024019	ENSG00000135862.6	3.2e-38	+	183023419	183024019	0	1	600,	0
chr1	183142596	183142987	ENSG00000135862.6	7.9e-87	+	183142596	183142987	0	1	391,	0
chr1	183551913	183552093	ENSG00000116698.21	1e-09	+	183551913	183552093	0	1	180,	0
chr1	183552989	183553260	ENSG00000116698.21	4.9e-10	+	183552989	183553260	0	1	271,	0
chr1	183926163	183926463	ENSG00000143344.15	6.3e-09	+	183926163	183926463	0	1	300,	0
chr1	183926822	183926973	ENSG00000143344.15	0.00058	+	183926822	183926973	0	1	151,	0
chr1	184387267	184387328	ENSG00000116667.14	9.1e-05	+	184387267	184387328	0	1	61,	0
chr1	185174896	185175017	ENSG00000116668.13	3.6e-05	+	185174896	185175017	0	1	121,	0
chr1	192811529	192811798	ENSG00000116741.8	1.8e-08	+	192811529	192811798	0	1	269,	0
chr1	200048256	200048497	ENSG00000116833.14	0.00018	+	200048256	200048497	0	1	241,	0
chr1	200174187	200174367	ENSG00000116833.14	5.1e-07	+	200174187	200174367	0	1	180,	0
chr1	200739557	200739917	ENSG00000118200.14	3.2e-23	+	200739557	200739917	0	1	360,	0
chr1	200848886	200849276	ENSG00000118200.14	4e-20	+	200848886	200849276	0	1	390,	0
chr1	200849843	200849994	ENSG00000118200.14	1.4e-05	+	200849843	200849994	0	1	151,	0
chr1	200857802	200858192	ENSG00000118200.14	5e-11	+	200857802	200858192	0	1	390,	0
chr1	201623394	201623455	ENSG00000134369.15	0.00046	+	201623394	201623455	0	1	61,	0
chr1	201781073	201781224	ENSG00000134369.15	2.1e-05	+	201781073	201781224	0	1	151,	0
chr1	201782629	201782869	ENSG00000134369.15	6.3e-14	+	201782629	201782869	0	1	240,	0
chr1	201783644	201783735	ENSG00000134369.15	0.00033	+	201783644	201783735	0	1	91,	0
chr1	201819894	201820434	ENSG00000134369.15	7.9e-88	+	201819894	201820434	0	1	540,	0
chr1	201821662	201821933	ENSG00000134369.15	1.4e-09	+	201821662	201821933	0	1	271,	0
chr1	201876105	201876556	ENSG00000198700.10	1e-176	+	201876105	201876556	0	1	451,	0
chr1	201878084	201878534	ENSG00000198700.10	5e-23	+	201878084	201878534	0	1	450,	0
chr1	201878923	201879314	ENSG00000198700.10	1e-26	+	201878923	201879314	0	1	391,	0
chr1	201969525	201969796	ENSG00000134375.11	1e-47	+	201969525	201969796	0	1	271,	0
chr1	202438514	202438575	ENSG00000077157.22	0.00093	+	202438514	202438575	0	1	61,	0
chr1	202438424	202438601	ENSG00000232626.3	0.00066	+	202438424	202438601	0	1	177,	0
chr1	202438775	202438981	ENSG00000232626.3	0.00016	+	202438775	202438981	0	1	206,	0
chr1	203165309	203165460	ENSG00000163485.17	8.3e-05	+	203165309	203165460	0	1	151,	0
chr1	203165848	203165938	ENSG00000163485.17	0.0038	+	203165848	203165938	0	1	90,	0
chr1	203166177	203166627	ENSG00000163485.17	1.2e-05	+	203166177	203166627	0	1	450,	0
chr1	203167105	203167196	ENSG00000163485.17	8.3e-05	+	203167105	203167196	0	1	91,	0
chr1	203305550	203305671	ENSG00000159388.6	0.00052	+	203305550	203305671	0	1	121,	0
chr1	203307145	203307535	ENSG00000159388.6	5.5e-09	+	203307145	203307535	0	1	390,	0
chr1	203307624	203307865	ENSG00000159388.6	1.7e-07	+	203307624	203307865	0	1	241,	0
chr1	203683069	203683339	ENSG00000058668.14	1.6e-22	+	203683069	203683339	0	1	270,	0
chr1	203739743	203740103	ENSG00000058668.14	2e-09	+	203739743	203740103	0	1	360,	0
chr1	203797110	203797381	ENSG00000058673.16	7.9e-19	+	203797110	203797381	0	1	271,	0
chr1	203798489	203798610	ENSG00000058673.16	7.6e-05	+	203798489	203798610	0	1	121,	0
chr1	203798968	203799029	ENSG00000058673.16	0.0014	+	203798968	203799029	0	1	61,	0
chr1	203847468	203847529	ENSG00000058673.16	0.001	+	203847468	203847529	0	1	61,	0
chr1	203852271	203852541	ENSG00000058673.16	1.3e-45	+	203852271	203852541	0	1	270,	0
chr1	203852630	203852811	ENSG00000058673.16	2.4e-08	+	203852630	203852811	0	1	181,	0
chr1	203853559	203853950	ENSG00000058673.16	1.6e-35	+	203853559	203853950	0	1	391,	0
chr1	203797090	203797390	ENSG00000257315.2	5e-20	+	203797090	203797390	0	1	300,	0
chr1	203798466	203798617	ENSG00000257315.2	0.00022	+	203798466	203798617	0	1	151,	0
chr1	203847462	203847523	ENSG00000257315.2	0.00051	+	203847462	203847523	0	1	61,	0
chr1	203852275	203852545	ENSG00000257315.2	1e-45	+	203852275	203852545	0	1	270,	0
chr1	203852604	203852814	ENSG00000257315.2	2.4e-08	+	203852604	203852814	0	1	210,	0
chr1	203853561	203853952	ENSG00000257315.2	3.2e-35	+	203853561	203853952	0	1	391,	0
chr1	203861865	203861955	ENSG00000182004.13	0.00049	+	203861865	203861955	0	1	90,	0
chr1	204122255	204122315	ENSG00000143842.15	0.0002	+	204122255	204122315	0	1	60,	0
chr1	204126037	204126367	ENSG00000143842.15	6.3e-44	+	204126037	204126367	0	1	330,	0
chr1	204549241	204549662	ENSG00000198625.13	1e-219	+	204549241	204549662	0	1	421,	0
chr1	205017369	205017639	ENSG00000163531.15	0.00039	+	205017369	205017639	0	1	270,	0
chr1	205228214	205228424	ENSG00000133069.17	1e-06	+	205228214	205228424	0	1	210,	0
chr1	205228572	205228722	ENSG00000133069.17	0.00016	+	205228572	205228722	0	1	150,	0
chr1	205241744	205241834	ENSG00000133069.17	0.002	+	205241744	205241834	0	1	90,	0
chr1	205269073	205271145	ENSG00000133069.17	1e-80	+	205269073	205271145	0	2	811,26,	0,2046
chr1	205271940	205272031	ENSG00000133069.17	0.00043	+	205271940	205272031	0	1	91,	0
chr1	205504744	205504835	ENSG00000117266.15	0.00079	+	205504744	205504835	0	1	91,	0
chr1	205531384	205531834	ENSG00000117266.15	7.9e-11	+	205531384	205531834	0	1	450,	0
chr1	205894374	205894435	ENSG00000286619.1	0.0038	+	205894374	205894435	0	1	61,	0
chr1	206454295	206454595	ENSG00000266028.7	1.7e-05	+	206454295	206454595	0	1	300,	0
chr1	206454834	206454895	ENSG00000266028.7	0.00022	+	206454834	206454895	0	1	61,	0
chr1	206455883	206456154	ENSG00000266028.7	4e-14	+	206455883	206456154	0	1	271,	0
chr1	206461175	206461506	ENSG00000266028.7	5.9e-09	+	206461175	206461506	0	1	331,	0
chr1	206463933	206464143	ENSG00000266028.7	2.8e-10	+	206463933	206464143	0	1	210,	0
chr1	206587022	206587263	ENSG00000266094.7	1.5e-09	+	206587022	206587263	0	1	241,	0
chr1	206647543	206647784	ENSG00000143479.17	2.8e-07	+	206647543	206647784	0	1	241,	0
chr1	206647873	206648144	ENSG00000143479.17	2e-12	+	206647873	206648144	0	1	271,	0
chr1	206648323	206648653	ENSG00000143479.17	2e-13	+	206648323	206648653	0	1	330,	0
chr1	206685213	206685333	ENSG00000162889.10	0.0002	+	206685213	206685333	0	1	120,	0
chr1	206732634	206733025	ENSG00000162889.10	1e-233	+	206732634	206733025	0	1	391,	0
chr1	207049259	207049484	ENSG00000123836.15	9.5e-05	+	207049259	207049484	0	2	40,21,	0,204
chr1	207763203	207763263	ENSG00000234219.1	0.0019	+	207763203	207763263	0	1	60,	0
chr1	209675951	209676244	ENSG00000123689.6	5.6e-10	+	209675951	209676244	0	1	293,	0
chr1	209851462	209851552	ENSG00000117597.18	0.00076	+	209851462	209851552	0	1	90,	0
chr1	210160921	210160982	ENSG00000143469.19	0.0026	+	210160921	210160982	0	1	61,	0
chr1	210242130	210242430	ENSG00000082497.12	1.6e-16	+	210242130	210242430	0	1	300,	0
chr1	211313752	211313903	ENSG00000117625.13	1.1e-05	+	211313752	211313903	0	1	151,	0
chr1	211372338	211372848	ENSG00000082512.15	7.9e-23	+	211372338	211372848	0	1	510,	0
chr1	211374436	211374646	ENSG00000082512.15	3.5e-06	+	211374436	211374646	0	1	210,	0
chr1	212100616	212100826	ENSG00000143476.18	3.2e-22	+	212100616	212100826	0	1	210,	0
chr1	212100915	212102852	ENSG00000143476.18	8.9e-07	+	212100915	212102852	0	2	169,11,	0,1926
chr1	212285439	212285649	ENSG00000066027.12	2.2e-06	+	212285439	212285649	0	1	210,	0
chr1	212329181	212329241	ENSG00000066027.12	0.00081	+	212329181	212329241	0	1	60,	0
chr1	212858274	212859051	ENSG00000162769.13	6.3e-78	+	212858274	212859051	0	1	777,	0
chr1	212950579	212950670	ENSG00000143494.15	0.00018	+	212950579	212950670	0	1	91,	0
chr1	212952500	212952741	ENSG00000143494.15	5.8e-06	+	212952500	212952741	0	1	241,	0
chr1	212972667	212972848	ENSG00000143494.15	2.8e-08	+	212972667	212972848	0	1	181,	0
chr1	213241588	213241739	ENSG00000136643.12	3.6e-06	+	213241588	213241739	0	1	151,	0
chr1	213241947	213242157	ENSG00000136643.12	4.9e-10	+	213241947	213242157	0	1	210,	0
chr1	213997199	213997349	ENSG00000117707.15	0.00039	+	213997199	213997349	0	1	150,	0
chr1	213997498	213997649	ENSG00000117707.15	2.7e-06	+	213997498	213997649	0	1	151,	0
chr1	214640297	214640508	ENSG00000117724.13	2e-09	+	214640297	214640508	0	1	211,	0
chr1	214641075	214641226	ENSG00000117724.13	6.2e-05	+	214641075	214641226	0	1	151,	0
chr1	214642661	214642722	ENSG00000117724.13	7.1e-05	+	214642661	214642722	0	1	61,	0
chr1	214644582	214644822	ENSG00000117724.13	7.9e-60	+	214644582	214644822	0	1	240,	0
chr1	214645510	214645840	ENSG00000117724.13	3.2e-65	+	214645510	214645840	0	1	330,	0
chr1	214645929	214646109	ENSG00000117724.13	0.00017	+	214645929	214646109	0	1	180,	0
chr1	214646587	214646738	ENSG00000117724.13	8.7e-05	+	214646587	214646738	0	1	151,	0
chr1	214647126	214647276	ENSG00000117724.13	6.5e-08	+	214647126	214647276	0	1	150,	0
chr1	214657013	214657104	ENSG00000117724.13	5.8e-05	+	214657013	214657104	0	1	91,	0
chr1	214659020	214663853	ENSG00000117724.13	1e-18	+	214659020	214663853	0	2	8,263,	0,4570
chr1	215620104	215620254	ENSG00000136636.13	1.1e-05	+	215620104	215620254	0	1	150,	0
chr1	218330974	218331155	ENSG00000067533.6	8.3e-08	+	218330974	218331155	0	1	181,	0
chr1	220661917	220662157	ENSG00000116141.15	7.2e-09	+	220661917	220662157	0	1	240,	0
chr1	220690392	220690572	ENSG00000162817.7	3.5e-05	+	220690392	220690572	0	1	180,	0
chr1	220696709	220696918	ENSG00000162817.7	7.9e-14	+	220696709	220696918	0	1	209,	0
chr1	220697275	220697544	ENSG00000162817.7	1e-16	+	220697275	220697544	0	1	269,	0
chr1	220698020	220698408	ENSG00000162817.7	3.2e-21	+	220698020	220698408	0	1	388,	0
chr1	220813548	220813669	ENSG00000186205.13	8.5e-09	+	220813548	220813669	0	1	121,	0
chr1	220813907	220814028	ENSG00000186205.13	5e-06	+	220813907	220814028	0	1	121,	0
chr1	220882210	220884503	ENSG00000286231.1	1.3e-66	+	220882210	220884503	0	2	138,309,	0,1984
chr1	220879789	220879880	ENSG00000136630.13	9.1e-05	+	220879789	220879880	0	1	91,	0
chr1	220880208	220880389	ENSG00000136630.13	0.00065	+	220880208	220880389	0	1	181,	0
chr1	220880478	220880569	ENSG00000136630.13	0.00039	+	220880478	220880569	0	1	91,	0
chr1	220882214	220882425	ENSG00000136630.13	6.6e-06	+	220882214	220882425	0	1	211,	0
chr1	220884190	220885059	ENSG00000136630.13	4e-68	+	220884190	220885059	0	1	869,	0
chr1	222627955	222628136	ENSG00000154305.18	1.6e-12	+	222627955	222628136	0	1	181,	0
chr1	222628913	222629094	ENSG00000154305.18	7.6e-06	+	222628913	222629094	0	1	181,	0
chr1	222629602	222630112	ENSG00000154305.18	5e-41	+	222629602	222630112	0	1	510,	0
chr1	222665460	222665641	ENSG00000154305.18	1.3e-15	+	222665460	222665641	0	1	181,	0
chr1	223002586	223002916	ENSG00000154309.8	4e-11	+	223002586	223002916	0	1	330,	0
chr1	223003871	223004052	ENSG00000154309.8	5.1e-07	+	223003871	223004052	0	1	181,	0
chr1	223005037	223005367	ENSG00000154309.8	6.6e-09	+	223005037	223005367	0	1	330,	0
chr1	223005575	223005816	ENSG00000154309.8	3.2e-22	+	223005575	223005816	0	1	241,	0
chr1	223757707	223757828	ENSG00000162909.18	5.2e-05	+	223757707	223757828	0	1	121,	0
chr1	223758605	223758725	ENSG00000162909.18	0.00093	+	223758605	223758725	0	1	120,	0
chr1	224157404	224157675	ENSG00000143756.12	1.3e-20	+	224157404	224157675	0	1	271,	0
chr1	224157824	224157974	ENSG00000143756.12	1.5e-05	+	224157824	224157974	0	1	150,	0
chr1	224175904	224183376	ENSG00000143753.13	2e-11	+	224175904	224183376	0	2	43,137,	0,7335
chr1	224189585	224189854	ENSG00000143753.13	2e-63	+	224189585	224189854	0	1	269,	0
chr1	224192426	224192696	ENSG00000143753.13	1e-27	+	224192426	224192696	0	1	270,	0
chr1	224434659	224434918	ENSG00000143786.8	2.5e-39	+	224434659	224434918	0	2	203,7,	0,252
chr1	224739358	224739508	ENSG00000143786.8	0.00093	+	224739358	224739508	0	1	150,	0
chr1	225810151	225810211	ENSG00000143819.12	0.0059	+	225810151	225810211	0	1	60,	0
chr1	226062059	226062857	ENSG00000163041.11	9.8e-07	+	226062059	226062857	0	2	35,144,	0,654
chr1	226895686	226895956	ENSG00000143801.17	4e-31	+	226895686	226895956	0	1	270,	0
chr1	226939559	226940434	ENSG00000163050.17	2.1e-06	+	226939559	226940434	0	2	32,149,	0,726
chr1	226961499	226974974	ENSG00000163050.17	5e-43	+	226961499	226974974	0	4	63,411,67,120,	0,3500,4171,13355
chr1	226986674	226986855	ENSG00000163050.17	2.5e-08	+	226986674	226986855	0	1	181,	0
chr1	227654350	227654591	ENSG00000181450.17	1.3e-33	+	227654350	227654591	0	1	241,	0
chr1	227677292	227677443	ENSG00000181450.17	1.7e-05	+	227677292	227677443	0	1	151,	0
chr1	227728747	227732845	ENSG00000143740.14	1e-260	+	227728747	227732845	0	3	39,163,457,	0,2837,3641
chr1	227733173	227733294	ENSG00000143740.14	1.1e-05	+	227733173	227733294	0	1	121,	0
chr1	227734100	227734311	ENSG00000143740.14	2.9e-10	+	227734100	227734311	0	1	211,	0
chr1	227736463	227747847	ENSG00000143740.14	7.4e-09	+	227736463	227747847	0	2	24,156,	0,11228
chr1	227747966	227759176	ENSG00000143740.14	1e-175	+	227747966	227759176	0	2	267,182,	0,11028
chr1	227766960	227770687	ENSG00000143740.14	3.2e-20	+	227766960	227770687	0	2	123,117,	0,3610
chr1	227776926	227781111	ENSG00000143740.14	0	+	227776926	227781111	0	2	44,585,	0,3600
chr1	228097869	228098049	ENSG00000143761.16	6.3e-37	+	228097869	228098049	0	1	180,	0
chr1	228141535	228141806	ENSG00000143774.16	6.3e-14	+	228141535	228141806	0	1	271,	0
chr1	228158106	228158255	ENSG00000198835.4	2e-05	+	228158106	228158255	0	1	149,	0
chr1	228158461	228158611	ENSG00000198835.4	3.5e-06	+	228158461	228158611	0	1	150,	0
chr1	228158787	228158937	ENSG00000198835.4	0.00031	+	228158787	228158937	0	1	150,	0
chr1	228174755	228175508	ENSG00000181873.13	1e-146	+	228174755	228175508	0	2	274,387,	0,366
chr1	228175777	228175928	ENSG00000181873.13	0.00014	+	228175777	228175928	0	1	151,	0
chr1	228176647	228176708	ENSG00000181873.13	0.00095	+	228176647	228176708	0	1	61,	0
chr1	228212122	228212363	ENSG00000154358.21	0.00012	+	228212122	228212363	0	1	241,	0
chr1	228256733	228259518	ENSG00000154358.21	7.6e-05	+	228256733	228259518	0	2	193,18,	0,2767
chr1	228286103	228286193	ENSG00000154358.21	0.0013	+	228286103	228286193	0	1	90,	0
chr1	228288847	228292548	ENSG00000154358.21	4.7e-08	+	228288847	228292548	0	3	41,264,26,	0,3050,3675
chr1	228292607	228292668	ENSG00000154358.21	0.0013	+	228292607	228292668	0	1	61,	0
chr1	228293472	228294188	ENSG00000154358.21	0.00046	+	228293472	228294188	0	2	144,37,	0,679
chr1	228294881	228294972	ENSG00000154358.21	0.0038	+	228294881	228294972	0	1	91,	0
chr1	228360700	228360821	ENSG00000154358.21	0.0012	+	228360700	228360821	0	1	121,	0
chr1	228394319	228396967	ENSG00000270094.1	5e-25	+	228394319	228396967	0	3	129,96,225,	0,1391,2423
chr1	228488473	228493243	ENSG00000168159.12	4e-20	+	228488473	228493243	0	3	12,97,191,	0,486,4579
chr1	228494030	228494600	ENSG00000168159.12	6.3e-38	+	228494030	228494600	0	1	570,	0
chr1	228743563	228743773	ENSG00000116574.6	3.3e-05	+	228743563	228743773	0	1	210,	0
chr1	229635119	229636557	ENSG00000135763.10	2.5e-90	+	229635119	229636557	0	1	1438,	0
chr1	229636616	229636946	ENSG00000135763.10	6.3e-27	+	229636616	229636946	0	1	330,	0
chr1	229637095	229637455	ENSG00000135763.10	2.5e-29	+	229637095	229637455	0	1	360,	0
chr1	229637873	229643548	ENSG00000135763.10	1.3e-56	+	229637873	229643548	0	2	374,16,	0,5659
chr1	229659181	229659422	ENSG00000135763.10	4e-19	+	229659181	229659422	0	1	241,	0
chr1	230067297	230067388	ENSG00000143641.10	0.0005	+	230067297	230067388	0	1	91,	0
chr1	230279312	230279402	ENSG00000143641.10	0.00022	+	230279312	230279402	0	1	90,	0
chr1	230279461	230280120	ENSG00000143641.10	1e-277	+	230279461	230280120	0	1	659,	0
chr1	230280806	230280897	ENSG00000143641.10	7.2e-05	+	230280806	230280897	0	1	91,	0
chr1	230693381	230693592	ENSG00000135775.14	1.3e-08	+	230693381	230693592	0	1	211,	0
chr1	231000283	231000494	ENSG00000173409.14	6.3e-27	+	231000283	231000494	0	1	211,	0
chr1	231267830	231269901	ENSG00000116906.13	1.4e-06	+	231267830	231269901	0	2	81,39,	0,2032
chr1	231337103	231337883	ENSG00000010072.16	2.5e-85	+	231337103	231337883	0	1	780,	0
chr1	231694085	231694265	ENSG00000270106.6	9.8e-07	+	231694085	231694265	0	1	180,	0
chr1	231694472	231694742	ENSG00000270106.6	4.8e-09	+	231694472	231694742	0	1	270,	0
chr1	231694071	231694282	ENSG00000162946.22	1.4e-06	+	231694071	231694282	0	1	211,	0
chr1	231694490	231694731	ENSG00000162946.22	2.4e-08	+	231694490	231694731	0	1	241,	0
chr1	232976564	232976655	ENSG00000135778.12	0.00051	+	232976564	232976655	0	1	91,	0
chr1	233327723	233328771	ENSG00000143674.11	6.3e-41	+	233327723	233328771	0	1	1048,	0
chr1	233379322	233382814	ENSG00000143674.11	1e-170	+	233379322	233382814	0	2	388,510,	0,2982
chr1	234607007	234609483	ENSG00000228830.1	0	+	234607007	234609483	0	2	630,63,	0,2413
chr1	235328489	235329141	ENSG00000152904.11	1e-14	+	235328489	235329141	0	3	9,209,113,	0,80,539
chr1	235329260	235329792	ENSG00000152904.11	3.2e-19	+	235329260	235329792	0	2	169,72,	0,460
chr1	235342192	235342373	ENSG00000152904.11	4e-12	+	235342192	235342373	0	1	181,	0
chr1	235328569	235329110	ENSG00000285053.1	2.5e-16	+	235328569	235329110	0	2	209,152,	0,389
chr1	235329258	235329769	ENSG00000285053.1	1e-134	+	235329258	235329769	0	1	511,	0
chr1	235330097	235330248	ENSG00000285053.1	2e-05	+	235330097	235330248	0	1	151,	0
chr1	235342210	235342880	ENSG00000285053.1	1.6e-12	+	235342210	235342880	0	2	136,45,	0,625
chr1	235615208	235615328	ENSG00000227236.2	0.0012	+	235615208	235615328	0	1	120,	0
chr1	235615505	235615565	ENSG00000227236.2	0.0038	+	235615505	235615565	0	1	60,	0
chr1	235615891	235616070	ENSG00000227236.2	7.8e-07	+	235615891	235616070	0	1	179,	0
chr1	236482291	236482592	ENSG00000186197.14	4e-14	+	236482291	236482592	0	1	301,	0
chr1	236482651	236482891	ENSG00000186197.14	7.9e-16	+	236482651	236482891	0	1	240,	0
chr1	236483220	236483431	ENSG00000186197.14	7.4e-09	+	236483220	236483431	0	1	211,	0
chr1	236483789	236484779	ENSG00000186197.14	1.6e-44	+	236483789	236484779	0	1	990,	0
chr1	236483223	236483432	ENSG00000244457.2	7.4e-09	+	236483223	236483432	0	1	209,	0
chr1	236483786	236484438	ENSG00000244457.2	4e-45	+	236483786	236484438	0	1	652,	0
chr1	236543070	236544861	ENSG00000116977.18	2e-40	+	236543070	236544861	0	2	578,112,	0,1679
chr1	236897569	236898290	ENSG00000116984.13	3.2e-50	+	236897569	236898290	0	1	721,	0
chr1	236899249	236899310	ENSG00000116984.13	0.00089	+	236899249	236899310	0	1	61,	0
chr1	236903477	236903868	ENSG00000116984.13	1.6e-41	+	236903477	236903868	0	1	391,	0
chr1	239387104	239387194	ENSG00000133019.11	0.00046	+	239387104	239387194	0	1	90,	0
chr1	239908377	239908558	ENSG00000133019.11	0.00058	+	239908377	239908558	0	1	181,	0
chr1	239909037	239909308	ENSG00000133019.11	5.5e-06	+	239909037	239909308	0	1	271,	0
chr1	240068029	240123242	ENSG00000155816.20	1e-155	+	240068029	240123242	0	3	44,1842,64,	0,23853,55149
chr1	240206838	240206989	ENSG00000155816.20	1.5e-06	+	240206838	240206989	0	1	151,	0
chr1	240207198	240207408	ENSG00000155816.20	2e-07	+	240207198	240207408	0	1	210,	0
chr1	241878797	241879037	ENSG00000174371.17	2.1e-10	+	241878797	241879037	0	1	240,	0
chr1	243164637	243164786	ENSG00000232085.1	0.00018	+	243164637	243164786	0	2	29,115,	0,34
chr1	244048938	244051377	ENSG00000179456.10	0.002	+	244048938	244051377	0	2	55,95,	0,2344
chr1	244051436	244055449	ENSG00000179456.10	0	+	244051436	244055449	0	2	8,1662,	0,2351
chr1	244056640	244056850	ENSG00000179456.10	2.5e-43	+	244056640	244056850	0	1	210,	0
chr1	244653491	244653881	ENSG00000121644.19	8.3e-05	+	244653491	244653881	0	1	390,	0
chr1	244705622	244705863	ENSG00000121644.19	4e-14	+	244705622	244705863	0	1	241,	0
chr1	245091232	245091413	ENSG00000203666.12	3.6e-05	+	245091232	245091413	0	1	181,	0
chr1	245687332	245687422	ENSG00000162849.16	0.00047	+	245687332	245687422	0	1	90,	0
chr1	245702604	245702725	ENSG00000162849.16	0.00018	+	245702604	245702725	0	1	121,	0
chr1	246591704	246591855	ENSG00000162852.14	6e-07	+	246591704	246591855	0	1	151,	0
chr1	246647499	246647890	ENSG00000162852.14	2e-12	+	246647499	246647890	0	1	391,	0
chr1	246665778	246665989	ENSG00000162852.14	2.8e-08	+	246665778	246665989	0	1	211,	0
chr1	248847092	248848530	ENSG00000171161.13	7.9e-65	+	248847092	248848530	0	1	1438,	0
chr1	248916774	248917044	ENSG00000185220.12	2.9e-06	+	248916774	248917044	0	1	270,	0
chr1	248917581	248917912	ENSG00000185220.12	1.3e-09	+	248917581	248917912	0	1	331,	0
chr1	248918090	248918330	ENSG00000185220.12	2.5e-14	+	248918090	248918330	0	1	240,	0
chr1	729623	729774	ENSG00000228327.3	0.00012	-	729623	729774	0	1	151,	0
chr1	916869	918211	ENSG00000223764.2	5e-52	-	916869	918211	0	2	851,190,	0,1152
chr1	918388	919692	ENSG00000223764.2	7.9e-44	-	918388	919692	0	3	146,91,358,	0,436,946
chr1	944202	944532	ENSG00000188976.11	0	-	944202	944532	0	1	330,	0
chr1	998961	999109	ENSG00000188290.10	1e-13	-	998961	999109	0	1	148,	0
chr1	1081817	1083406	ENSG00000131591.17	1.3e-88	-	1081817	1083406	0	1	1589,	0
chr1	1090385	1090476	ENSG00000131591.17	0.00093	-	1090385	1090476	0	1	91,	0
chr1	1091733	1091824	ENSG00000131591.17	0.00066	-	1091733	1091824	0	1	91,	0
chr1	1091973	1092034	ENSG00000131591.17	0.00071	-	1091973	1092034	0	1	61,	0
chr1	1092272	1092784	ENSG00000131591.17	9.8e-06	-	1092272	1092784	0	2	22,219,	0,293
chr1	1216907	1217624	ENSG00000078808.17	1e-116	-	1216907	1217624	0	1	717,	0
chr1	1218485	1218605	ENSG00000078808.17	0.00046	-	1218485	1218605	0	1	120,	0
chr1	1223894	1228645	ENSG00000078808.17	6.3e-17	-	1223894	1228645	0	3	74,48,178,	0,3377,4573
chr1	1254862	1255370	ENSG00000160087.20	5e-66	-	1254862	1255370	0	1	508,	0
chr1	1273705	1273885	ENSG00000160087.20	1.5e-05	-	1273705	1273885	0	1	180,	0
chr1	1292718	1292869	ENSG00000131584.19	9.5e-08	-	1292718	1292869	0	1	151,	0
chr1	1312475	1312596	ENSG00000127054.20	2.1e-09	-	1312475	1312596	0	1	121,	0
chr1	1312685	1316374	ENSG00000127054.20	1e-212	-	1312685	1316374	0	3	907,1966,218,	0,1046,3471
chr1	1318710	1319941	ENSG00000127054.20	1.3e-82	-	1318710	1319941	0	1	1231,	0
chr1	1320420	1320631	ENSG00000127054.20	7.6e-08	-	1320420	1320631	0	1	211,	0
chr1	1320840	1322798	ENSG00000127054.20	2.8e-07	-	1320840	1322798	0	3	256,77,28,	0,1067,1930
chr1	1317669	1317818	ENSG00000240731.1	5.6e-06	-	1317669	1317818	0	1	149,	0
chr1	1335454	1337983	ENSG00000107404.20	1.3e-28	-	1335454	1337983	0	3	1061,38,7,	0,1563,2522
chr1	1342479	1349119	ENSG00000107404.20	1.9e-07	-	1342479	1349119	0	3	5,70,224,	0,209,6416
chr1	1349178	1349388	ENSG00000107404.20	2.8e-06	-	1349178	1349388	0	1	210,	0
chr1	1353646	1353856	ENSG00000162576.16	5.2e-05	-	1353646	1353856	0	1	210,	0
chr1	1355034	1355095	ENSG00000162576.16	0.0019	-	1355034	1355095	0	1	61,	0
chr1	1361387	1361597	ENSG00000162576.16	1.1e-05	-	1361387	1361597	0	1	210,	0
chr1	1373729	1374333	ENSG00000175756.13	6.3e-47	-	1373729	1374333	0	2	173,334,	0,270
chr1	1374958	1375227	ENSG00000175756.13	2e-26	-	1374958	1375227	0	1	269,	0
chr1	1385860	1386220	ENSG00000221978.12	8.5e-08	-	1385860	1386220	0	1	360,	0
chr1	1386788	1387358	ENSG00000221978.12	1e-220	-	1386788	1387358	0	1	570,	0
chr1	1399274	1399335	ENSG00000221978.12	5.9e-05	-	1399274	1399335	0	1	61,	0
chr1	1430714	1430803	ENSG00000225285.1	0.0012	-	1430714	1430803	0	1	89,	0
chr1	1434250	1434456	ENSG00000225285.1	0.0012	-	1434250	1434456	0	1	206,	0
chr1	1541672	1541763	ENSG00000160075.12	3.5e-09	-	1541672	1541763	0	1	91,	0
chr1	1544951	1545102	ENSG00000160075.12	0.00023	-	1544951	1545102	0	1	151,	0
chr1	1564732	1564823	ENSG00000160075.12	6.3e-11	-	1564732	1564823	0	1	91,	0
chr1	1598011	1598760	ENSG00000228594.4	1.6e-59	-	1598011	1598760	0	1	749,	0
chr1	1598998	1599537	ENSG00000228594.4	5e-29	-	1598998	1599537	0	1	539,	0
chr1	1615135	1615735	ENSG00000272106.1	7.6e-07	-	1615135	1615735	0	1	600,	0
chr1	1662993	1663203	ENSG00000189339.11	6e-05	-	1662993	1663203	0	1	210,	0
chr1	1663322	1663563	ENSG00000189339.11	2e-20	-	1663322	1663563	0	1	241,	0
chr1	1663712	1663863	ENSG00000189339.11	4.6e-05	-	1663712	1663863	0	1	151,	0
chr1	1664911	1665901	ENSG00000189339.11	1e-169	-	1664911	1665901	0	1	990,	0
chr1	1709581	1712414	ENSG00000008128.23	7.9e-11	-	1709581	1712414	0	2	59,151,	0,2682
chr1	1709563	1716371	ENSG00000268575.1	1e-10	-	1709563	1716371	0	3	77,137,26,	0,2700,6782
chr1	1728235	1728415	ENSG00000215790.7	0.0019	-	1728235	1728415	0	1	180,	0
chr1	1729341	1729402	ENSG00000215790.7	0.0014	-	1729341	1729402	0	1	61,	0
chr1	1890906	1891117	ENSG00000078369.18	3.6e-10	-	1890906	1891117	0	1	211,	0
chr1	1917737	1917975	ENSG00000178821.13	1.6e-27	-	1917737	1917975	0	1	238,	0
chr1	2182361	2182511	ENSG00000182873.5	0.00066	-	2182361	2182511	0	1	150,	0
chr1	2183675	2183766	ENSG00000182873.5	0.00027	-	2183675	2183766	0	1	91,	0
chr1	2184610	2185361	ENSG00000162585.17	4e-52	-	2184610	2185361	0	1	751,	0
chr1	2187067	2187128	ENSG00000162585.17	0.00032	-	2187067	2187128	0	1	61,	0
chr1	2190724	2191145	ENSG00000162585.17	3.2e-17	-	2190724	2191145	0	1	421,	0
chr1	2191353	2191444	ENSG00000162585.17	0.00017	-	2191353	2191444	0	1	91,	0
chr1	2191953	2192824	ENSG00000162585.17	5e-20	-	2191953	2192824	0	1	871,	0
chr1	2332321	2332562	ENSG00000116151.14	0.00011	-	2332321	2332562	0	1	241,	0
chr1	2375849	2376030	ENSG00000116151.14	5.6e-05	-	2375849	2376030	0	1	181,	0
chr1	2376179	2376510	ENSG00000116151.14	2.3e-07	-	2376179	2376510	0	1	331,	0
chr1	2376929	2377080	ENSG00000116151.14	0.00046	-	2376929	2377080	0	1	151,	0
chr1	2377259	2377800	ENSG00000116151.14	3.6e-05	-	2377259	2377800	0	1	541,	0
chr1	2378609	2378939	ENSG00000116151.14	3.9e-06	-	2378609	2378939	0	1	330,	0
chr1	2386071	2386222	ENSG00000116151.14	0.00023	-	2386071	2386222	0	1	151,	0
chr1	2386401	2386492	ENSG00000116151.14	0.00066	-	2386401	2386492	0	1	91,	0
chr1	2404888	2405157	ENSG00000157911.10	2.2e-10	-	2404888	2405157	0	1	269,	0
chr1	2405216	2405634	ENSG00000157911.10	3.2e-13	-	2405216	2405634	0	1	418,	0
chr1	2508530	2508860	ENSG00000157881.14	4e-36	-	2508530	2508860	0	1	330,	0
chr1	2590848	2590909	ENSG00000142606.16	0.00069	-	2590848	2590909	0	1	61,	0
chr1	3064181	3064272	ENSG00000177133.11	0.0015	-	3064181	3064272	0	1	91,	0
chr1	3489568	3489689	ENSG00000162591.16	0.00058	-	3489568	3489689	0	1	121,	0
chr1	3631245	3631306	ENSG00000116213.16	0.00022	-	3631245	3631306	0	1	61,	0
chr1	3736257	3736437	ENSG00000227372.12	7.9e-15	-	3736257	3736437	0	1	180,	0
chr1	3737993	3738353	ENSG00000227372.12	2.5e-21	-	3737993	3738353	0	1	360,	0
chr1	3745426	3745996	ENSG00000227372.12	1e-27	-	3745426	3745996	0	1	570,	0
chr1	3746055	3747014	ENSG00000227372.12	1e-90	-	3746055	3747014	0	1	959,	0
chr1	3779483	3779544	ENSG00000130764.10	0.0038	-	3779483	3779544	0	1	61,	0
chr1	3784017	3784137	ENSG00000130764.10	0.00046	-	3784017	3784137	0	1	120,	0
chr1	3786871	3787201	ENSG00000130764.10	1.3e-16	-	3786871	3787201	0	1	330,	0
chr1	3795960	3796020	ENSG00000130764.10	0.00027	-	3795960	3796020	0	1	60,	0
chr1	3796378	3796468	ENSG00000130764.10	0.0011	-	3796378	3796468	0	1	90,	0
chr1	3815227	3815348	ENSG00000116198.13	0.0019	-	3815227	3815348	0	1	121,	0
chr1	3890634	3890933	ENSG00000198912.11	1.3e-33	-	3890634	3890933	0	1	299,	0
chr1	6248851	6249691	ENSG00000158292.7	1.3e-22	-	6248851	6249691	0	1	840,	0
chr1	6249840	6250547	ENSG00000158292.7	7.1e-06	-	6249840	6250547	0	2	163,108,	0,599
chr1	6260977	6261098	ENSG00000158292.7	0.00016	-	6260977	6261098	0	1	121,	0
chr1	6385812	6393465	ENSG00000097021.19	8.7e-06	-	6385812	6393465	0	2	1,209,	0,7444
chr1	6468345	6468466	ENSG00000171680.21	1.1e-05	-	6468345	6468466	0	1	121,	0
chr1	6468584	6469219	ENSG00000171680.21	6.5e-05	-	6468584	6469219	0	2	2,178,	0,457
chr1	6524398	6524758	ENSG00000162408.11	1e-255	-	6524398	6524758	0	1	360,	0
chr1	6525534	6525625	ENSG00000162408.11	1.1e-05	-	6525534	6525625	0	1	91,	0
chr1	6592575	6593711	ENSG00000162413.16	1e-119	-	6592575	6593711	0	1	1136,	0
chr1	6595532	6601807	ENSG00000162413.16	1.6e-55	-	6595532	6601807	0	4	25,406,67,11,	0,3514,4217,6264
chr1	6601955	6602703	ENSG00000162413.16	1.3e-52	-	6601955	6602703	0	1	748,	0
chr1	6634496	6634975	ENSG00000007923.16	3.2e-20	-	6634496	6634975	0	1	479,	0
chr1	6635034	6635244	ENSG00000007923.16	1.2e-07	-	6635034	6635244	0	1	210,	0
chr1	6635303	6635603	ENSG00000007923.16	1e-147	-	6635303	6635603	0	1	300,	0
chr1	8013183	8013333	ENSG00000116285.13	5.2e-05	-	8013183	8013333	0	1	150,	0
chr1	8013929	8014228	ENSG00000116285.13	1.2e-10	-	8013929	8014228	0	1	299,	0
chr1	8878248	8878710	ENSG00000074800.16	1e-11	-	8878248	8878710	0	2	19,131,	0,331
chr1	9103989	9104170	ENSG00000180758.12	2.8e-07	-	9103989	9104170	0	1	181,	0
chr1	9681062	9681121	ENSG00000231789.2	0.00095	-	9681062	9681121	0	1	59,	0
chr1	9729563	9729833	ENSG00000171603.17	1.3e-13	-	9729563	9729833	0	1	270,	0
chr1	9730251	9731206	ENSG00000171603.17	5e-21	-	9730251	9731206	0	2	454,85,	0,870
chr1	10461257	10463012	ENSG00000160049.12	1e-101	-	10461257	10463012	0	2	445,545,	0,1210
chr1	11045675	11045826	ENSG00000009724.16	0.0018	-	11045675	11045826	0	1	151,	0
chr1	11106954	11107165	ENSG00000198793.12	1.4e-08	-	11106954	11107165	0	1	211,	0
chr1	11259395	11262507	ENSG00000198793.12	9.8e-05	-	11259395	11262507	0	2	28,63,	0,3049
chr1	11788656	11789136	ENSG00000177000.12	4e-12	-	11788656	11789136	0	1	480,	0
chr1	11789525	11789705	ENSG00000177000.12	4.9e-07	-	11789525	11789705	0	1	180,	0
chr1	11790124	11791211	ENSG00000177000.12	5e-56	-	11790124	11791211	0	2	774,5,	0,1082
chr1	11800236	11800417	ENSG00000177000.12	1.2e-05	-	11800236	11800417	0	1	181,	0
chr1	11800506	11800566	ENSG00000177000.12	0.0038	-	11800506	11800566	0	1	60,	0
chr1	11803317	11803438	ENSG00000177000.12	0.00046	-	11803317	11803438	0	1	121,	0
chr1	11803527	11803587	ENSG00000177000.12	0.0014	-	11803527	11803587	0	1	60,	0
chr1	11805542	11805992	ENSG00000177000.12	6.3e-16	-	11805542	11805992	0	1	450,	0
chr1	11920007	11920277	ENSG00000116685.16	4.6e-09	-	11920007	11920277	0	1	270,	0
chr1	11922505	11922894	ENSG00000116685.16	1.3e-40	-	11922505	11922894	0	1	389,	0
chr1	11923072	11926428	ENSG00000116685.16	4e-47	-	11923072	11926428	0	2	417,1224,	0,2132
chr1	12618030	12618210	ENSG00000162496.9	5.2e-06	-	12618030	12618210	0	1	180,	0
chr1	15492717	15492927	ENSG00000132906.18	8.9e-08	-	15492717	15492927	0	1	210,	0
chr1	15834801	15836023	ENSG00000179743.4	1.3e-18	-	15834801	15836023	0	1	1222,	0
chr1	15941958	15942168	ENSG00000116809.11	1.9e-05	-	15941958	15942168	0	1	210,	0
chr1	15944443	15944504	ENSG00000116809.11	4.9e-05	-	15944443	15944504	0	1	61,	0
chr1	16148413	16148473	ENSG00000142627.13	2.1e-05	-	16148413	16148473	0	1	60,	0
chr1	16148711	16148890	ENSG00000142627.13	1.5e-06	-	16148711	16148890	0	1	179,	0
chr1	16155919	16155980	ENSG00000142627.13	0.0019	-	16155919	16155980	0	1	61,	0
chr1	16231721	16232557	ENSG00000132881.12	7.9e-25	-	16231721	16232557	0	2	576,48,	0,788
chr1	16236974	16237183	ENSG00000132881.12	4e-08	-	16236974	16237183	0	1	209,	0
chr1	16247467	16247528	ENSG00000037637.11	0.0026	-	16247467	16247528	0	1	61,	0
chr1	16250610	16251030	ENSG00000037637.11	6.3e-97	-	16250610	16251030	0	1	420,	0
chr1	16251089	16251389	ENSG00000037637.11	7.9e-30	-	16251089	16251389	0	1	300,	0
chr1	16602298	16602389	ENSG00000219481.10	0.0018	-	16602298	16602389	0	1	91,	0
chr1	16602627	16602808	ENSG00000219481.10	0.00012	-	16602627	16602808	0	1	181,	0
chr1	16613471	16613562	ENSG00000219481.10	0.00016	-	16613471	16613562	0	1	91,	0
chr1	17407838	17408476	ENSG00000179051.14	1.6e-96	-	17407838	17408476	0	1	638,	0
chr1	18956015	18956166	ENSG00000169991.11	0.00011	-	18956015	18956166	0	1	151,	0
chr1	19219069	19219429	ENSG00000127463.15	1e-128	-	19219069	19219429	0	1	360,	0
chr1	19419687	19420111	ENSG00000077549.18	3e-05	-	19419687	19420111	0	2	64,87,	0,337
chr1	19682987	19683077	ENSG00000162542.13	0.0026	-	19682987	19683077	0	1	90,	0
chr1	20483527	20483648	ENSG00000162545.6	7.8e-05	-	20483527	20483648	0	1	121,	0
chr1	20499837	20501276	ENSG00000090432.7	5e-97	-	20499837	20501276	0	1	1439,	0
chr1	20648465	20648943	ENSG00000117242.7	2.5e-26	-	20648465	20648943	0	1	478,	0
chr1	20650701	20651030	ENSG00000117242.7	2e-15	-	20650701	20651030	0	1	329,	0
chr1	20664097	20664506	ENSG00000117245.12	2.6e-05	-	20664097	20664506	0	2	107,119,	0,290
chr1	20720089	20720150	ENSG00000189410.12	0.0014	-	20720089	20720150	0	1	61,	0
chr1	20720358	20720718	ENSG00000189410.12	5e-10	-	20720358	20720718	0	1	360,	0
chr1	20721225	20721406	ENSG00000189410.12	0.00027	-	20721225	20721406	0	1	181,	0
chr1	20941504	20942135	ENSG00000075151.20	2e-13	-	20941504	20942135	0	1	631,	0
chr1	21176344	21176858	ENSG00000075151.20	6.2e-05	-	21176344	21176858	0	2	14,137,	0,377
chr1	21217815	21218385	ENSG00000117298.16	3.2e-45	-	21217815	21218385	0	1	570,	0
chr1	21218983	21219283	ENSG00000117298.16	6.3e-22	-	21218983	21219283	0	1	300,	0
chr1	21219702	21220092	ENSG00000117298.16	7.9e-27	-	21219702	21220092	0	1	390,	0
chr1	21822363	21822514	ENSG00000142798.20	7.4e-07	-	21822363	21822514	0	1	151,	0
chr1	22030332	22030751	ENSG00000285752.1	1e-42	-	22030332	22030751	0	1	419,	0
chr1	23088581	23090464	ENSG00000169641.13	7.9e-31	-	23088581	23090464	0	2	472,38,	0,1845
chr1	23091204	23091475	ENSG00000169641.13	3.2e-14	-	23091204	23091475	0	1	271,	0
chr1	23092614	23092855	ENSG00000169641.13	2.5e-16	-	23092614	23092855	0	1	241,	0
chr1	23093094	23093215	ENSG00000169641.13	0.00013	-	23093094	23093215	0	1	121,	0
chr1	23310453	23310813	ENSG00000125944.20	3.2e-49	-	23310453	23310813	0	1	360,	0
chr1	23361481	23361841	ENSG00000125945.15	2.3e-07	-	23361481	23361841	0	1	360,	0
chr1	23362767	23362857	ENSG00000125945.15	0.0026	-	23362767	23362857	0	1	90,	0
chr1	23442270	23442590	ENSG00000088280.19	8.3e-05	-	23442270	23442590	0	2	1,90,	0,230
chr1	23509600	23516384	ENSG00000007968.7	1e-127	-	23509600	23516384	0	2	548,50,	0,6734
chr1	23520954	23521015	ENSG00000007968.7	0.0025	-	23520954	23521015	0	1	61,	0
chr1	23558284	23558345	ENSG00000117318.9	0.00019	-	23558284	23558345	0	1	61,	0
chr1	23845491	23845611	ENSG00000179163.11	0.0002	-	23845491	23845611	0	1	120,	0
chr1	24156502	24156563	ENSG00000185436.12	0.0074	-	24156502	24156563	0	1	61,	0
chr1	24156622	24156742	ENSG00000185436.12	8.1e-07	-	24156622	24156742	0	1	120,	0
chr1	24156981	24157820	ENSG00000185436.12	1.3e-30	-	24156981	24157820	0	1	839,	0
chr1	24357687	24357898	ENSG00000001460.18	0.00083	-	24357687	24357898	0	1	211,	0
chr1	24358107	24358527	ENSG00000001460.18	2.5e-47	-	24358107	24358527	0	1	420,	0
chr1	24391292	24391473	ENSG00000001460.18	4.1e-07	-	24391292	24391473	0	1	181,	0
chr1	25253732	25253793	ENSG00000117616.18	0.0055	-	25253732	25253793	0	1	61,	0
chr1	25835067	25835692	ENSG00000127423.10	3.2e-20	-	25835067	25835692	0	1	625,	0
chr1	25862767	25863098	ENSG00000182749.5	7.9e-14	-	25862767	25863098	0	1	331,	0
chr1	25863456	25863787	ENSG00000182749.5	1.6e-22	-	25863456	25863787	0	1	331,	0
chr1	25961469	25961918	ENSG00000158006.14	1.3e-47	-	25961469	25961918	0	1	449,	0
chr1	26170107	26170256	ENSG00000236782.7	7.9e-08	-	26170107	26170256	0	1	149,	0
chr1	26170551	26170907	ENSG00000236782.7	0	-	26170551	26170907	0	1	356,	0
chr1	26171202	26171351	ENSG00000236782.7	0.00047	-	26171202	26171351	0	1	149,	0
chr1	26889004	26890044	ENSG00000142751.15	1.6e-33	-	26889004	26890044	0	2	121,359,	0,681
chr1	26890487	26890725	ENSG00000198746.13	6.3e-19	-	26890487	26890725	0	1	238,	0
chr1	26894301	26897608	ENSG00000198746.13	1e-115	-	26894301	26897608	0	2	109,308,	0,2999
chr1	26900169	26900230	ENSG00000198746.13	0.0033	-	26900169	26900230	0	1	61,	0
chr1	27005733	27006121	ENSG00000158246.8	1.3e-17	-	27005733	27006121	0	1	388,	0
chr1	27006329	27006776	ENSG00000158246.8	1.3e-07	-	27006329	27006776	0	1	447,	0
chr1	27099531	27099682	ENSG00000090020.11	0.00034	-	27099531	27099682	0	1	151,	0
chr1	27409789	27409970	ENSG00000158195.11	0.00059	-	27409789	27409970	0	1	181,	0
chr1	27534693	27534784	ENSG00000126705.14	0.00065	-	27534693	27534784	0	1	91,	0
chr1	27534903	27550362	ENSG00000126705.14	1e-127	-	27534903	27550362	0	2	13,3102,	0,12357
chr1	27550631	27551980	ENSG00000126705.14	4e-29	-	27550631	27551980	0	1	1349,	0
chr1	27603617	27604251	ENSG00000126705.14	1e-21	-	27603617	27604251	0	2	16,524,	0,110
chr1	28149701	28149851	ENSG00000169403.12	0.0026	-	28149701	28149851	0	1	150,	0
chr1	28230241	28233029	ENSG00000126698.11	4e-14	-	28230241	28233029	0	2	11,109,	0,2679
chr1	28603335	28603456	ENSG00000120656.11	0.00015	-	28603335	28603456	0	1	121,	0
chr1	28870658	28870717	ENSG00000233427.1	0.00011	-	28870658	28870717	0	1	59,	0
chr1	29119428	29119758	ENSG00000253304.2	2.1e-06	-	29119428	29119758	0	1	330,	0
chr1	29120835	29121076	ENSG00000253304.2	5.5e-06	-	29120835	29121076	0	1	241,	0
chr1	29148251	29148402	ENSG00000116350.17	7.9e-13	-	29148251	29148402	0	1	151,	0
chr1	29148670	29149181	ENSG00000116350.17	1.6e-53	-	29148670	29149181	0	1	511,	0
chr1	29193261	29193621	ENSG00000116353.15	6.3e-36	-	29193261	29193621	0	1	360,	0
chr1	30718978	30719128	ENSG00000162510.6	1.5e-05	-	30718978	30719128	0	1	150,	0
chr1	30869615	30869735	ENSG00000162512.16	0.00066	-	30869615	30869735	0	1	120,	0
chr1	30869884	30870065	ENSG00000162512.16	3.2e-07	-	30869884	30870065	0	1	181,	0
chr1	30872698	30877047	ENSG00000162512.16	2e-79	-	30872698	30877047	0	3	679,292,496,	0,1598,3853
chr1	31059243	31059394	ENSG00000134644.15	3.7e-09	-	31059243	31059394	0	1	151,	0
chr1	31061902	31065781	ENSG00000134644.15	1.1e-05	-	31061902	31065781	0	2	14,166,	0,3713
chr1	31181412	31181530	ENSG00000084628.10	0.00016	-	31181412	31181530	0	1	118,	0
chr1	31630339	31630636	ENSG00000162517.13	5e-52	-	31630339	31630636	0	1	297,	0
chr1	31727116	31727536	ENSG00000121753.12	5e-65	-	31727116	31727536	0	1	420,	0
chr1	31730837	31731257	ENSG00000121753.12	5e-22	-	31730837	31731257	0	1	420,	0
chr1	31756287	31756737	ENSG00000121753.12	2.5e-20	-	31756287	31756737	0	1	450,	0
chr1	31937990	31942571	ENSG00000184007.21	2e-37	-	31937990	31942571	0	2	378,43,	0,4538
chr1	32214679	32214948	ENSG00000160055.19	8.1e-08	-	32214679	32214948	0	1	269,	0
chr1	32216312	32216789	ENSG00000160055.19	4e-91	-	32216312	32216789	0	1	477,	0
chr1	32334403	32334730	ENSG00000175130.7	0	-	32334403	32334730	0	1	327,	0
chr1	32334937	32335966	ENSG00000175130.7	6.3e-23	-	32334937	32335966	0	2	160,20,	0,1009
chr1	32362541	32362661	ENSG00000225828.1	8.7e-05	-	32362541	32362661	0	1	120,	0
chr1	32363499	32363709	ENSG00000225828.1	5e-15	-	32363499	32363709	0	1	210,	0
chr1	32366505	32366715	ENSG00000160058.18	8.5e-06	-	32366505	32366715	0	1	210,	0
chr1	32368476	32369335	ENSG00000160058.18	5e-11	-	32368476	32369335	0	2	74,106,	0,753
chr1	32374748	32376556	ENSG00000160058.18	4e-84	-	32374748	32376556	0	2	34,295,	0,1513
chr1	32386831	32393716	ENSG00000160058.18	3.7e-05	-	32386831	32393716	0	2	64,116,	0,6769
chr1	32775745	32775956	ENSG00000134684.10	1e-117	-	32775745	32775956	0	1	211,	0
chr1	32811623	32817374	ENSG00000134684.10	2.5e-11	-	32811623	32817374	0	2	24,187,	0,5564
chr1	32862848	32862932	ENSG00000160097.18	0.0026	-	32862848	32862932	0	1	84,	0
chr1	32936744	32937285	ENSG00000116514.16	3.2e-48	-	32936744	32937285	0	1	541,	0
chr1	33008029	33008809	ENSG00000004455.16	1e-150	-	33008029	33008809	0	1	780,	0
chr1	33036760	33036941	ENSG00000004455.16	2.2e-05	-	33036760	33036941	0	1	181,	0
chr1	33146713	33146774	ENSG00000116525.14	0.0034	-	33146713	33146774	0	1	61,	0
chr1	33147102	33147312	ENSG00000116525.14	3.9e-06	-	33147102	33147312	0	1	210,	0
chr1	33147400	33147581	ENSG00000116525.14	2.2e-07	-	33147400	33147581	0	1	181,	0
chr1	33324671	33324971	ENSG00000134686.18	1.6e-70	-	33324671	33324971	0	1	300,	0
chr1	34855294	34855894	ENSG00000163866.9	1e-109	-	34855294	34855894	0	1	600,	0
chr1	34904460	34904641	ENSG00000116544.12	0.00058	-	34904460	34904641	0	1	181,	0
chr1	34987214	34987275	ENSG00000163867.17	0.0074	-	34987214	34987275	0	1	61,	0
chr1	34987394	34987575	ENSG00000163867.17	5.1e-07	-	34987394	34987575	0	1	181,	0
chr1	35192516	35192816	ENSG00000116560.11	1.3e-35	-	35192516	35192816	0	1	300,	0
chr1	35359136	35365991	ENSG00000227409.1	0.00081	-	35359136	35365991	0	2	32,26,	0,6829
chr1	35433791	35433971	ENSG00000142687.18	1.9e-05	-	35433791	35433971	0	1	180,	0
chr1	35506713	35507103	ENSG00000142687.18	4e-32	-	35506713	35507103	0	1	390,	0
chr1	35557739	35557950	ENSG00000142687.18	6.3e-14	-	35557739	35557950	0	1	211,	0
chr1	35714145	35714445	ENSG00000142686.8	2.3e-09	-	35714145	35714445	0	1	300,	0
chr1	35714593	35714863	ENSG00000142686.8	1.3e-45	-	35714593	35714863	0	1	270,	0
chr1	35715729	35716621	ENSG00000142686.8	2e-61	-	35715729	35716621	0	2	597,121,	0,771
chr1	35718714	35718894	ENSG00000142686.8	1.4e-07	-	35718714	35718894	0	1	180,	0
chr1	35720696	35720937	ENSG00000092853.14	1.6e-38	-	35720696	35720937	0	1	241,	0
chr1	35735184	35735245	ENSG00000092853.14	8.5e-05	-	35735184	35735245	0	1	61,	0
chr1	35753914	35760769	ENSG00000092853.14	4e-54	-	35753914	35760769	0	2	22,428,	0,6427
chr1	35764325	35764535	ENSG00000092853.14	1.2e-09	-	35764325	35764535	0	1	210,	0
chr1	35765307	35769978	ENSG00000092853.14	0.00016	-	35765307	35769978	0	2	19,132,	0,4539
chr1	36136718	36136899	ENSG00000054116.12	1e-12	-	36136718	36136899	0	1	181,	0
chr1	36136987	36137227	ENSG00000054116.12	4e-50	-	36136987	36137227	0	1	240,	0
chr1	36322030	36323947	ENSG00000142694.6	2e-80	-	36322030	36323947	0	4	695,97,157,55,	0,940,1428,1862
chr1	36341327	36341387	ENSG00000196182.10	0.0042	-	36341327	36341387	0	1	60,	0
chr1	36341536	36341746	ENSG00000196182.10	1.6e-12	-	36341536	36341746	0	1	210,	0
chr1	36361299	36362578	ENSG00000196182.10	0.003	-	36361299	36362578	0	2	41,20,	0,1259
chr1	36372768	36385896	ENSG00000196182.10	5e-18	-	36372768	36385896	0	2	6,174,	0,12954
chr1	36393676	36394149	ENSG00000181817.6	1e-109	-	36393676	36394149	0	1	473,	0
chr1	36455717	36455897	ENSG00000116898.12	1.3e-56	-	36455717	36455897	0	1	180,	0
chr1	37455435	37455496	ENSG00000233621.2	0.0026	-	37455435	37455496	0	1	61,	0
chr1	37455615	37455765	ENSG00000233621.2	0.00039	-	37455615	37455765	0	1	150,	0
chr1	37537681	37538011	ENSG00000163877.11	7.9e-31	-	37537681	37538011	0	1	330,	0
chr1	37540333	37540724	ENSG00000163877.11	2e-30	-	37540333	37540724	0	1	391,	0
chr1	37690408	37691056	ENSG00000116922.14	7.8e-05	-	37690408	37691056	0	2	112,9,	0,639
chr1	37799719	37800704	ENSG00000233728.1	7.9e-75	-	37799719	37800704	0	2	450,75,	0,910
chr1	37815108	37815498	ENSG00000188786.10	2.5e-27	-	37815108	37815498	0	1	390,	0
chr1	37822166	37822586	ENSG00000188786.10	2.5e-19	-	37822166	37822586	0	1	420,	0
chr1	37857403	37859562	ENSG00000188786.10	2e-11	-	37857403	37859562	0	3	306,52,32,	0,1084,2127
chr1	37997247	37997398	ENSG00000183386.10	3.6e-07	-	37997247	37997398	0	1	151,	0
chr1	38045118	38045628	ENSG00000185668.7	3.9e-06	-	38045118	38045628	0	1	510,	0
chr1	38045836	38046495	ENSG00000185668.7	2.5e-13	-	38045836	38046495	0	1	659,	0
chr1	38838586	38838707	ENSG00000116954.8	0.00018	-	38838586	38838707	0	1	121,	0
chr1	38838975	38839514	ENSG00000116954.8	1e-23	-	38838975	38839514	0	1	539,	0
chr1	38859472	38859682	ENSG00000116954.8	3.7e-05	-	38859472	38859682	0	1	210,	0
chr1	38839332	38839511	ENSG00000273637.1	3.7e-08	-	38839332	38839511	0	1	179,	0
chr1	39524188	39524249	ENSG00000243970.3	0.0026	-	39524188	39524249	0	1	61,	0
chr1	39524667	39524817	ENSG00000243970.3	0.00012	-	39524667	39524817	0	1	150,	0
chr1	39524966	39525296	ENSG00000243970.3	0.00015	-	39524966	39525296	0	1	330,	0
chr1	39624213	39624304	ENSG00000163909.8	0.0011	-	39624213	39624304	0	1	91,	0
chr1	39624573	39624724	ENSG00000163909.8	1.5e-06	-	39624573	39624724	0	1	151,	0
chr1	39624813	39624964	ENSG00000163909.8	3e-05	-	39624813	39624964	0	1	151,	0
chr1	39625232	39625293	ENSG00000163909.8	0.0012	-	39625232	39625293	0	1	61,	0
chr1	39625352	39626252	ENSG00000163909.8	1.6e-36	-	39625352	39626252	0	1	900,	0
chr1	39759638	39759729	ENSG00000116985.12	0.00039	-	39759638	39759729	0	1	91,	0
chr1	39760058	39760419	ENSG00000116985.12	1.2e-05	-	39760058	39760419	0	1	361,	0
chr1	39769582	39769912	ENSG00000198754.5	7.9e-14	-	39769582	39769912	0	1	330,	0
chr1	39771078	39771348	ENSG00000198754.5	1.5e-07	-	39771078	39771348	0	1	270,	0
chr1	39895934	39896564	ENSG00000116990.11	6.3e-23	-	39895934	39896564	0	1	630,	0
chr1	39896773	39897493	ENSG00000116990.11	1e-13	-	39896773	39897493	0	1	720,	0
chr1	39900960	39901111	ENSG00000116990.11	0.00022	-	39900960	39901111	0	1	151,	0
chr1	39901289	39901650	ENSG00000116990.11	2.1e-07	-	39901289	39901650	0	1	361,	0
chr1	40257581	40257878	ENSG00000259943.1	4e-24	-	40257581	40257878	0	1	297,	0
chr1	40514632	40514942	ENSG00000227278.1	8.1e-07	-	40514632	40514942	0	2	2,143,	0,167
chr1	40861229	40861918	ENSG00000179862.6	6.3e-16	-	40861229	40861918	0	1	689,	0
chr1	41028094	41028155	ENSG00000010803.16	0.0024	-	41028094	41028155	0	1	61,	0
chr1	41510470	41511040	ENSG00000127124.16	1.6e-32	-	41510470	41511040	0	1	570,	0
chr1	41512888	41513248	ENSG00000127124.16	2.3e-07	-	41512888	41513248	0	1	360,	0
chr1	41513457	41518409	ENSG00000127124.16	5.6e-10	-	41513457	41518409	0	2	293,8,	0,4944
chr1	41584937	41585118	ENSG00000127124.16	0.00027	-	41584937	41585118	0	1	181,	0
chr1	42746334	42746724	ENSG00000117385.15	7.9e-47	-	42746334	42746724	0	1	390,	0
chr1	42807198	42807346	ENSG00000177868.12	2.8e-07	-	42807198	42807346	0	1	148,	0
chr1	42834139	42834919	ENSG00000228192.8	2.5e-16	-	42834139	42834919	0	1	780,	0
chr1	42926390	42926750	ENSG00000117394.22	6.3e-55	-	42926390	42926750	0	1	360,	0
chr1	42926869	42927049	ENSG00000117394.22	4.4e-05	-	42926869	42927049	0	1	180,	0
chr1	42958667	42958817	ENSG00000117394.22	0.00081	-	42958667	42958817	0	1	150,	0
chr1	43363695	43363875	ENSG00000066322.15	1e-12	-	43363695	43363875	0	1	180,	0
chr1	43451002	43451241	ENSG00000178922.16	1.3e-12	-	43451002	43451241	0	1	239,	0
chr1	43451449	43451672	ENSG00000178922.16	1.3e-05	-	43451449	43451672	0	2	95,25,	0,198
chr1	43453571	43453632	ENSG00000178922.16	0.001	-	43453571	43453632	0	1	61,	0
chr1	43704459	43707101	ENSG00000236200.6	6.3e-83	-	43704459	43707101	0	2	287,43,	0,2599
chr1	43974524	43974643	ENSG00000285649.1	0.00027	-	43974524	43974643	0	1	119,	0
chr1	43997249	43997904	ENSG00000196517.11	1e-12	-	43997249	43997904	0	2	490,50,	0,605
chr1	44654643	44654764	ENSG00000126106.14	0.00013	-	44654643	44654764	0	1	121,	0
chr1	45018101	45018460	ENSG00000162415.7	1.3e-20	-	45018101	45018460	0	1	359,	0
chr1	45018668	45018849	ENSG00000162415.7	1.3e-11	-	45018668	45018849	0	1	181,	0
chr1	45206144	45303944	ENSG00000162415.7	2e-13	-	45206144	45303944	0	2	461,18,	0,97782
chr1	45699881	45699972	ENSG00000197429.10	0.00011	-	45699881	45699972	0	1	91,	0
chr1	45741159	45741220	ENSG00000197429.10	0.0013	-	45741159	45741220	0	1	61,	0
chr1	46043403	46043583	ENSG00000117461.15	1.3e-05	-	46043403	46043583	0	1	180,	0
chr1	46188681	46188921	ENSG00000085998.14	2e-29	-	46188681	46188921	0	1	240,	0
chr1	46197923	46197984	ENSG00000085998.14	1e-05	-	46197923	46197984	0	1	61,	0
chr1	46198317	46220156	ENSG00000085998.14	4e-35	-	46198317	46220156	0	2	117,452,	0,21387
chr1	46278778	46278839	ENSG00000132128.16	3.3e-05	-	46278778	46278839	0	1	61,	0
chr1	46285335	46285966	ENSG00000132128.16	2e-43	-	46285335	46285966	0	1	631,	0
chr1	46286114	46286355	ENSG00000132128.16	1e-10	-	46286114	46286355	0	1	241,	0
chr1	46303217	46303308	ENSG00000132128.16	0.00098	-	46303217	46303308	0	1	91,	0
chr1	46668319	46668410	ENSG00000123472.12	8.5e-06	-	46668319	46668410	0	1	91,	0
chr1	47219858	47219979	ENSG00000162367.11	0.0038	-	47219858	47219979	0	1	121,	0
chr1	47251333	47251394	ENSG00000123473.15	0.00051	-	47251333	47251394	0	1	61,	0
chr1	47251512	47251693	ENSG00000123473.15	9.3e-07	-	47251512	47251693	0	1	181,	0
chr1	47272193	47280492	ENSG00000123473.15	6.3e-26	-	47272193	47280492	0	2	48,252,	0,8047
chr1	47432132	47433118	ENSG00000237424.1	2.5e-31	-	47432132	47433118	0	1	986,	0
chr1	47433267	47434163	ENSG00000237424.1	3.2e-48	-	47433267	47434163	0	1	896,	0
chr1	47434312	47434641	ENSG00000237424.1	2e-15	-	47434312	47434641	0	1	329,	0
chr1	47994185	47994486	ENSG00000269113.4	2e-07	-	47994185	47994486	0	1	301,	0
chr1	51878013	51878757	ENSG00000078618.21	7.9e-57	-	51878013	51878757	0	2	27,483,	0,261
chr1	52030521	52033526	ENSG00000117862.12	1e-08	-	52030521	52033526	0	2	27,242,	0,2763
chr1	52030529	52032876	ENSG00000285839.1	5e-06	-	52030529	52032876	0	2	19,189,	0,2158
chr1	52033023	52033350	ENSG00000285839.1	2e-12	-	52033023	52033350	0	1	327,	0
chr1	52032161	52032871	ENSG00000198841.3	2.5e-53	-	52032161	52032871	0	1	710,	0
chr1	52033018	52033521	ENSG00000198841.3	1e-15	-	52033018	52033521	0	1	503,	0
chr1	52352629	52352960	ENSG00000154222.14	5e-16	-	52352629	52352960	0	1	331,	0
chr1	52393458	52393726	ENSG00000085840.13	1.6e-23	-	52393458	52393726	0	1	268,	0
chr1	52475043	52475343	ENSG00000134744.14	3.2e-45	-	52475043	52475343	0	1	300,	0
chr1	52525681	52525802	ENSG00000134744.14	8.5e-05	-	52525681	52525802	0	1	121,	0
chr1	52687521	52697926	ENSG00000162377.6	1e-161	-	52687521	52697926	0	3	647,141,18,	0,5205,10387
chr1	52897228	52897409	ENSG00000121310.17	2.3e-09	-	52897228	52897409	0	1	181,	0
chr1	52897558	52897829	ENSG00000121310.17	1.3e-31	-	52897558	52897829	0	1	271,	0
chr1	53214158	53214367	ENSG00000162384.14	2.5e-15	-	53214158	53214367	0	1	209,	0
chr1	53214456	53214695	ENSG00000162384.14	4e-27	-	53214456	53214695	0	1	239,	0
chr1	53220454	53220634	ENSG00000162384.14	3.2e-07	-	53220454	53220634	0	1	180,	0
chr1	53244574	53244755	ENSG00000157193.17	0.00083	-	53244574	53244755	0	1	181,	0
chr1	53767807	53767987	ENSG00000058804.12	1.1e-08	-	53767807	53767987	0	1	180,	0
chr1	53851748	53851869	ENSG00000058799.15	7.6e-06	-	53851748	53851869	0	1	121,	0
chr1	54053173	54053384	ENSG00000116209.11	1.2e-07	-	54053173	54053384	0	1	211,	0
chr1	54173394	54173664	ENSG00000215883.10	6.3e-11	-	54173394	54173664	0	1	270,	0
chr1	54173963	54174802	ENSG00000215883.10	1.6e-29	-	54173963	54174802	0	1	839,	0
chr1	54225759	54226029	ENSG00000157216.15	1.6e-68	-	54225759	54226029	0	1	270,	0
chr1	54226178	54226537	ENSG00000157216.15	5e-15	-	54226178	54226537	0	1	359,	0
chr1	54405989	54412756	ENSG00000157216.15	1e-40	-	54405989	54412756	0	2	430,49,	0,6718
chr1	54609599	54609690	ENSG00000162391.12	5.2e-05	-	54609599	54609690	0	1	91,	0
chr1	54757612	54758865	ENSG00000162396.6	3.2e-91	-	54757612	54758865	0	1	1253,	0
chr1	54850671	54850852	ENSG00000116133.13	1e-24	-	54850671	54850852	0	1	181,	0
chr1	54850970	54851509	ENSG00000116133.13	5e-70	-	54850970	54851509	0	1	539,	0
chr1	54851597	54851718	ENSG00000116133.13	3e-08	-	54851597	54851718	0	1	121,	0
chr1	54851896	54852345	ENSG00000116133.13	1e-107	-	54851896	54852345	0	1	449,	0
chr1	55066478	55066689	ENSG00000162402.14	3.2e-27	-	55066478	55066689	0	1	211,	0
chr1	55067317	55067498	ENSG00000162402.14	3.5e-10	-	55067317	55067498	0	1	181,	0
chr1	55068636	55069027	ENSG00000162402.14	3.2e-72	-	55068636	55069027	0	1	391,	0
chr1	55214823	55215364	ENSG00000162402.14	3.7e-05	-	55214823	55215364	0	1	541,	0
chr1	58539059	58539180	ENSG00000162600.12	7.6e-05	-	58539059	58539180	0	1	121,	0
chr1	58682016	58682227	ENSG00000162601.11	5e-19	-	58682016	58682227	0	1	211,	0
chr1	58682375	58682526	ENSG00000162601.11	1.3e-05	-	58682375	58682526	0	1	151,	0
chr1	58780997	58781148	ENSG00000177606.6	2e-14	-	58780997	58781148	0	1	151,	0
chr1	58781507	58784117	ENSG00000177606.6	0	-	58781507	58784117	0	1	2610,	0
chr1	63593600	63593721	ENSG00000142856.16	0.00062	-	63593600	63593721	0	1	121,	0
chr1	67412936	67415318	ENSG00000142864.14	0	-	67412936	67415318	0	2	327,153,	0,2229
chr1	67777481	67833467	ENSG00000172380.6	8.7e-06	-	67777481	67833467	0	2	26,124,	0,55862
chr1	68126006	68126186	ENSG00000116729.14	2.3e-07	-	68126006	68126186	0	1	180,	0
chr1	68232373	68232697	ENSG00000116729.14	3e-07	-	68232373	68232697	0	2	172,38,	0,286
chr1	68162144	68162293	ENSG00000234383.1	0.00031	-	68162144	68162293	0	1	149,	0
chr1	70354016	70354435	ENSG00000118454.13	2.5e-16	-	70354016	70354435	0	1	419,	0
chr1	70354584	70354734	ENSG00000118454.13	3.5e-05	-	70354584	70354734	0	1	150,	0
chr1	77565647	77566093	ENSG00000036549.13	1.9e-06	-	77565647	77566093	0	2	137,13,	0,433
chr1	77631860	77632490	ENSG00000036549.13	5e-12	-	77631860	77632490	0	1	630,	0
chr1	77632788	77632999	ENSG00000036549.13	2e-14	-	77632788	77632999	0	1	211,	0
chr1	77887673	77887793	ENSG00000235927.4	0.00093	-	77887673	77887793	0	1	120,	0
chr1	77888595	77888745	ENSG00000235927.4	0.0012	-	77888595	77888745	0	1	150,	0
chr1	77888893	77889161	ENSG00000235927.4	2.5e-05	-	77888893	77889161	0	1	268,	0
chr1	77970000	77978990	ENSG00000162613.16	0.00028	-	77970000	77978990	0	2	15,106,	0,8884
chr1	84506165	84506255	ENSG00000174021.11	0.00095	-	84506165	84506255	0	1	90,	0
chr1	84812739	84812800	ENSG00000171517.6	0.0032	-	84812739	84812800	0	1	61,	0
chr1	84865630	84866110	ENSG00000171517.6	1e-58	-	84865630	84866110	0	1	480,	0
chr1	85158863	85159193	ENSG00000097096.9	1.6e-10	-	85158863	85159193	0	1	330,	0
chr1	85182116	85182447	ENSG00000097096.9	7.9e-13	-	85182116	85182447	0	1	331,	0
chr1	85182505	85183075	ENSG00000097096.9	2.3e-07	-	85182505	85183075	0	1	570,	0
chr1	85190080	85190230	ENSG00000097096.9	0.00044	-	85190080	85190230	0	1	150,	0
chr1	85190439	85190529	ENSG00000097096.9	0.00046	-	85190439	85190529	0	1	90,	0
chr1	85200446	85200986	ENSG00000097096.9	1.6e-24	-	85200446	85200986	0	1	540,	0
chr1	85707773	85708253	ENSG00000117174.11	4e-21	-	85707773	85708253	0	1	480,	0
chr1	86350296	86350686	ENSG00000122417.15	8.9e-08	-	86350296	86350686	0	1	390,	0
chr1	86351254	86351315	ENSG00000122417.15	0.0028	-	86351254	86351315	0	1	61,	0
chr1	86914007	86914186	ENSG00000183291.17	4.4e-05	-	86914007	86914186	0	1	179,	0
chr1	88982537	88982747	ENSG00000213516.10	2e-14	-	88982537	88982747	0	1	210,	0
chr1	88983015	88983196	ENSG00000213516.10	3e-05	-	88983015	88983196	0	1	181,	0
chr1	88983255	88983824	ENSG00000213516.10	1e-11	-	88983255	88983824	0	1	569,	0
chr1	89582817	89582878	ENSG00000231999.7	0.00038	-	89582817	89582878	0	1	61,	0
chr1	89820780	89820868	ENSG00000272931.1	7.6e-05	-	89820780	89820868	0	1	88,	0
chr1	89993621	89993942	ENSG00000228175.3	2e-14	-	89993621	89993942	0	1	321,	0
chr1	90711804	90711983	ENSG00000143032.8	0.00012	-	90711804	90711983	0	1	179,	0
chr1	90783000	90783211	ENSG00000233593.10	1.6e-13	-	90783000	90783211	0	1	211,	0
chr1	90937575	90937845	ENSG00000122482.21	5.5e-09	-	90937575	90937845	0	1	270,	0
chr1	90939582	90939762	ENSG00000122482.21	1.1e-06	-	90939582	90939762	0	1	180,	0
chr1	91020883	91020944	ENSG00000122482.21	0.00079	-	91020883	91020944	0	1	61,	0
chr1	92475381	92475502	ENSG00000162676.12	3.6e-05	-	92475381	92475502	0	1	121,	0
chr1	92475741	92475892	ENSG00000162676.12	6.9e-08	-	92475741	92475892	0	1	151,	0
chr1	92513672	92513763	ENSG00000067208.14	0.00079	-	92513672	92513763	0	1	91,	0
chr1	92843139	92843229	ENSG00000154511.12	0.0026	-	92843139	92843229	0	1	90,	0
chr1	92843555	92843764	ENSG00000154511.12	3.2e-11	-	92843555	92843764	0	1	209,	0
chr1	93180395	93180516	ENSG00000117500.13	3.2e-05	-	93180395	93180516	0	1	121,	0
chr1	93582439	93582799	ENSG00000137936.18	3e-08	-	93582439	93582799	0	1	360,	0
chr1	93876677	93877008	ENSG00000067334.14	1.6e-21	-	93876677	93877008	0	1	331,	0
chr1	94174109	94174649	ENSG00000137962.13	4e-14	-	94174109	94174649	0	1	540,	0
chr1	99969477	99969567	ENSG00000228084.1	0.0038	-	99969477	99969567	0	1	90,	0
chr1	100874078	100874229	ENSG00000162694.14	2.9e-08	-	100874078	100874229	0	1	151,	0
chr1	100990372	100990523	ENSG00000117543.21	2.3e-06	-	100990372	100990523	0	1	151,	0
chr1	108929776	108929986	ENSG00000121940.15	1.6e-21	-	108929776	108929986	0	1	210,	0
chr1	108971378	108971499	ENSG00000085433.15	5.2e-05	-	108971378	108971499	0	1	121,	0
chr1	109089071	109089400	ENSG00000273382.1	6.3e-16	-	109089071	109089400	0	1	329,	0
chr1	109089488	109089757	ENSG00000273382.1	1.6e-18	-	109089488	109089757	0	1	269,	0
chr1	109279644	109280121	ENSG00000134222.16	6.3e-53	-	109279644	109280121	0	1	477,	0
chr1	109426328	109426448	ENSG00000143106.13	0.0001	-	109426328	109426448	0	1	120,	0
chr1	109507733	109508033	ENSG00000181754.7	6.3e-13	-	109507733	109508033	0	1	300,	0
chr1	109508361	109508421	ENSG00000181754.7	0.00027	-	109508361	109508421	0	1	60,	0
chr1	109736649	109736799	ENSG00000134202.10	2.8e-06	-	109736649	109736799	0	1	150,	0
chr1	110209777	110209867	ENSG00000224965.1	0.0028	-	110209777	110209867	0	1	90,	0
chr1	110407553	110407793	ENSG00000134248.13	6.3e-20	-	110407553	110407793	0	1	240,	0
chr1	111415029	111415269	ENSG00000085465.12	3.4e-07	-	111415029	111415269	0	1	240,	0
chr1	111723721	111723902	ENSG00000197852.12	0.00011	-	111723721	111723902	0	1	181,	0
chr1	111724080	111724380	ENSG00000197852.12	5e-11	-	111724080	111724380	0	1	300,	0
chr1	111726888	111726978	ENSG00000197852.12	0.00047	-	111726888	111726978	0	1	90,	0
chr1	111727156	111727546	ENSG00000197852.12	3.2e-22	-	111727156	111727546	0	1	390,	0
chr1	111982248	111982309	ENSG00000171385.9	0.0026	-	111982248	111982309	0	1	61,	0
chr1	112619544	112619695	ENSG00000007341.19	0.00095	-	112619544	112619695	0	1	151,	0
chr1	112913696	112913757	ENSG00000155380.11	3.7e-05	-	112913696	112913757	0	1	61,	0
chr1	112913875	112917694	ENSG00000155380.11	1e-129	-	112913875	112917694	0	2	290,517,	0,3302
chr1	112956020	112956259	ENSG00000155380.11	7.6e-08	-	112956020	112956259	0	1	239,	0
chr1	112956863	112957013	ENSG00000155380.11	1e-16	-	112956863	112957013	0	1	150,	0
chr1	113765928	113766318	ENSG00000081019.13	1.6e-13	-	113765928	113766318	0	1	390,	0
chr1	113797666	113797966	ENSG00000081019.13	3.2e-16	-	113797666	113797966	0	1	300,	0
chr1	113895092	113895183	ENSG00000134262.13	0.0005	-	113895092	113895183	0	1	91,	0
chr1	114137919	114139630	ENSG00000134207.16	0.00032	-	114137919	114139630	0	2	134,16,	0,1695
chr1	114567975	114568186	ENSG00000116752.6	2.5e-21	-	114567975	114568186	0	1	211,	0
chr1	114625318	114625498	ENSG00000175984.15	8.3e-05	-	114625318	114625498	0	1	180,	0
chr1	114774145	114774355	ENSG00000052723.11	4e-20	-	114774145	114774355	0	1	210,	0
chr1	116576735	116576885	ENSG00000143061.17	1.1e-05	-	116576735	116576885	0	1	150,	0
chr1	116577154	116577514	ENSG00000143061.17	5e-20	-	116577154	116577514	0	1	360,	0
chr1	116579612	116584709	ENSG00000143061.17	1.6e-18	-	116579612	116584709	0	2	265,65,	0,5032
chr1	116588979	116599965	ENSG00000143061.17	0.00011	-	116588979	116599965	0	2	125,25,	0,10961
chr1	116616173	116616234	ENSG00000143061.17	0.0028	-	116616173	116616234	0	1	61,	0
chr1	116666494	116667665	ENSG00000143061.17	2e-14	-	116666494	116667665	0	2	462,48,	0,1123
chr1	117025571	117025751	ENSG00000236137.1	0.00093	-	117025571	117025751	0	1	180,	0
chr1	117112285	117112406	ENSG00000134253.10	1.3e-05	-	117112285	117112406	0	1	121,	0
chr1	117118121	117118691	ENSG00000134253.10	1.6e-34	-	117118121	117118691	0	1	570,	0
chr1	117120995	117121175	ENSG00000134253.10	3.6e-05	-	117120995	117121175	0	1	180,	0
chr1	119032914	119033154	ENSG00000116874.11	3.2e-18	-	119032914	119033154	0	1	240,	0
chr1	119623275	119623366	ENSG00000143067.5	0.0013	-	119623275	119623366	0	1	91,	0
chr1	119623664	119647696	ENSG00000143067.5	1.3e-28	-	119623664	119647696	0	3	452,263,6,	0,2210,24026
chr1	119648055	119648266	ENSG00000143067.5	1.4e-08	-	119648055	119648266	0	1	211,	0
chr1	119914669	119915509	ENSG00000134250.20	1e-121	-	119914669	119915509	0	1	840,	0
chr1	119915688	119915838	ENSG00000134250.20	6.6e-07	-	119915688	119915838	0	1	150,	0
chr1	119923838	119923899	ENSG00000134250.20	0.00013	-	119923838	119923899	0	1	61,	0
chr1	120069452	120072715	ENSG00000134250.20	7.1e-06	-	120069452	120072715	0	2	210,1,	0,3262
chr1	120341451	120341871	ENSG00000223804.5	5e-14	-	120341451	120341871	0	2	55,155,	0,265
chr1	121183907	121184265	ENSG00000188610.12	2.5e-27	-	121183907	121184265	0	1	358,	0
chr1	144245717	144250326	ENSG00000232527.8	1.6e-13	-	144245717	144250326	0	2	104,102,	0,4507
chr1	144422704	144422975	ENSG00000266338.6	7.9e-22	-	144422704	144422975	0	1	271,	0
chr1	144461493	144461674	ENSG00000266338.6	0.00042	-	144461493	144461674	0	1	181,	0
chr1	144892153	144892214	ENSG00000196369.11	0.0019	-	144892153	144892214	0	1	61,	0
chr1	145168594	145169045	ENSG00000272419.6	5.5e-07	-	145168594	145169045	0	1	451,	0
chr1	145215817	145215908	ENSG00000272419.6	0.00083	-	145215817	145215908	0	1	91,	0
chr1	145848969	145849029	ENSG00000131788.16	4.3e-05	-	145848969	145849029	0	1	60,	0
chr1	145912231	145912406	ENSG00000131779.11	7.9e-17	-	145912231	145912406	0	1	175,	0
chr1	145927005	145927467	ENSG00000265241.6	0.0013	-	145927005	145927467	0	2	72,108,	0,354
chr1	145960216	145960485	ENSG00000272031.3	1.5e-07	-	145960216	145960485	0	1	269,	0
chr1	145960544	145960933	ENSG00000272031.3	2.5e-19	-	145960544	145960933	0	1	389,	0
chr1	145961409	145961679	ENSG00000272031.3	3.2e-11	-	145961409	145961679	0	1	270,	0
chr1	145962722	145962872	ENSG00000272031.3	0.0026	-	145962722	145962872	0	1	150,	0
chr1	146066016	146066196	ENSG00000271425.8	5.1e-07	-	146066016	146066196	0	1	180,	0
chr1	147630371	147630791	ENSG00000162836.12	6e-08	-	147630371	147630791	0	1	420,	0
chr1	147670103	147670344	ENSG00000162836.12	9.1e-08	-	147670103	147670344	0	1	241,	0
chr1	148532732	148532943	ENSG00000270629.6	9.3e-06	-	148532732	148532943	0	1	211,	0
chr1	149055793	149056556	ENSG00000269713.7	3.8e-05	-	149055793	149056556	0	2	106,45,	0,718
chr1	149913335	149914054	ENSG00000159164.10	5.2e-10	-	149913335	149914054	0	1	719,	0
chr1	149914142	149917754	ENSG00000159164.10	0.00016	-	149914142	149917754	0	2	45,16,	0,3596
chr1	149926716	149926777	ENSG00000143368.10	0.0002	-	149926716	149926777	0	1	61,	0
chr1	149943415	149947279	ENSG00000264522.6	1e-163	-	149943415	149947279	0	2	1650,29,	0,3835
chr1	149949665	149949726	ENSG00000264522.6	0.00069	-	149949665	149949726	0	1	61,	0
chr1	150010665	150010726	ENSG00000264522.6	0.0016	-	150010665	150010726	0	1	61,	0
chr1	150067551	150067611	ENSG00000285184.3	0.0013	-	150067551	150067611	0	1	60,	0
chr1	150223282	150226716	ENSG00000143401.15	6.2e-09	-	150223282	150226716	0	2	12,109,	0,3325
chr1	150236006	150236156	ENSG00000143401.15	5.2e-10	-	150236006	150236156	0	1	150,	0
chr1	150266116	150266237	ENSG00000117362.13	2.9e-06	-	150266116	150266237	0	1	121,	0
chr1	150266416	150266596	ENSG00000117362.13	4e-40	-	150266416	150266596	0	1	180,	0
chr1	150577004	150578506	ENSG00000143384.13	1.6e-30	-	150577004	150578506	0	2	487,263,	0,1239
chr1	150578744	150579678	ENSG00000143384.13	1.3e-40	-	150578744	150579678	0	2	33,836,	0,98
chr1	150622134	150622195	ENSG00000143420.18	1.8e-08	-	150622134	150622195	0	1	61,	0
chr1	150625540	150625690	ENSG00000143420.18	1.7e-05	-	150625540	150625690	0	1	150,	0
chr1	150627155	150627275	ENSG00000143420.18	4.9e-08	-	150627155	150627275	0	1	120,	0
chr1	150627424	150627484	ENSG00000143420.18	3.6e-06	-	150627424	150627484	0	1	60,	0
chr1	150629129	150629612	ENSG00000143420.18	2e-38	-	150629129	150629612	0	2	11,199,	0,284
chr1	150648223	150648640	ENSG00000143457.11	2.5e-66	-	150648223	150648640	0	1	417,	0
chr1	150960582	150962995	ENSG00000143418.19	3.1e-08	-	150960582	150962995	0	2	173,38,	0,2375
chr1	150974443	150974824	ENSG00000143418.19	3.4e-06	-	150974443	150974824	0	2	34,206,	0,175
chr1	150997003	150997422	ENSG00000143409.15	1.3e-12	-	150997003	150997422	0	1	419,	0
chr1	151002280	151002460	ENSG00000143409.15	1.6e-11	-	151002280	151002460	0	1	180,	0
chr1	151006461	151006700	ENSG00000143409.15	1.3e-13	-	151006461	151006700	0	1	239,	0
chr1	151052912	151053302	ENSG00000197622.13	1e-124	-	151052912	151053302	0	1	390,	0
chr1	151067308	151070325	ENSG00000197622.13	1.2e-05	-	151067308	151070325	0	3	26,62,62,	0,1010,2955
chr1	151132043	151132523	ENSG00000143434.15	5e-24	-	151132043	151132523	0	1	480,	0
chr1	151132792	151133391	ENSG00000143434.15	1.1e-09	-	151132792	151133391	0	1	599,	0
chr1	151146214	151146335	ENSG00000143434.15	0.00056	-	151146214	151146335	0	1	121,	0
chr1	151160762	151160972	ENSG00000163155.12	9.3e-07	-	151160762	151160972	0	1	210,	0
chr1	151165320	151165858	ENSG00000163155.12	6.3e-15	-	151165320	151165858	0	1	538,	0
chr1	151176617	151176827	ENSG00000163159.12	4e-19	-	151176617	151176827	0	1	210,	0
chr1	151185932	151195321	ENSG00000163159.12	2e-36	-	151185932	151195321	0	3	18,209,43,	0,4072,9346
chr1	151281799	151281950	ENSG00000232671.6	6.9e-07	-	151281799	151281950	0	1	151,	0
chr1	151292455	151292786	ENSG00000143393.16	6.3e-54	-	151292455	151292786	0	1	331,	0
chr1	151315590	151316460	ENSG00000143393.16	2e-72	-	151315590	151316460	0	1	870,	0
chr1	151342437	151342888	ENSG00000143390.17	7.9e-12	-	151342437	151342888	0	1	451,	0
chr1	151402843	151403143	ENSG00000143442.22	6.3e-14	-	151402843	151403143	0	1	300,	0
chr1	151404729	151406407	ENSG00000143442.22	1.3e-48	-	151404729	151406407	0	1	1678,	0
chr1	151428124	151428245	ENSG00000143442.22	3.5e-05	-	151428124	151428245	0	1	121,	0
chr1	151874243	151874513	ENSG00000159445.13	2e-20	-	151874243	151874513	0	1	270,	0
chr1	151993769	151993859	ENSG00000197747.9	0.00011	-	151993769	151993859	0	1	90,	0
chr1	152036971	152047878	ENSG00000163191.6	0.00076	-	152036971	152047878	0	2	33,57,	0,10850
chr1	153618786	153618907	ENSG00000189171.14	1.9e-06	-	153618786	153618907	0	1	121,	0
chr1	153634088	153634251	ENSG00000272030.1	0.00074	-	153634088	153634251	0	2	22,38,	0,125
chr1	153662322	153662383	ENSG00000143621.17	1.2e-07	-	153662322	153662383	0	1	61,	0
chr1	153819712	153828237	ENSG00000143614.10	3.2e-30	-	153819712	153828237	0	3	23,53,225,	0,7845,8300
chr1	153943124	153944142	ENSG00000198837.10	0.002	-	153943124	153944142	0	2	6,85,	0,933
chr1	153946627	153946718	ENSG00000198837.10	0.00022	-	153946627	153946718	0	1	91,	0
chr1	153947817	153948026	ENSG00000160741.17	2.2e-06	-	153947817	153948026	0	1	209,	0
chr1	153951502	153951563	ENSG00000160741.17	0.00091	-	153951502	153951563	0	1	61,	0
chr1	153977770	153977860	ENSG00000285641.1	2.3e-07	-	153977770	153977860	0	1	90,	0
chr1	153981885	153982006	ENSG00000143545.8	7.4e-07	-	153981885	153982006	0	1	121,	0
chr1	154183008	154183638	ENSG00000143549.21	2e-28	-	154183008	154183638	0	2	241,30,	0,600
chr1	154207325	154207506	ENSG00000143612.20	7.9e-16	-	154207325	154207506	0	1	181,	0
chr1	154550072	154550462	ENSG00000160714.10	1e-303	-	154550072	154550462	0	1	390,	0
chr1	154558363	154558968	ENSG00000160714.10	2.5e-20	-	154558363	154558968	0	2	299,61,	0,544
chr1	154584695	154584966	ENSG00000160710.17	3.2e-47	-	154584695	154584966	0	1	271,	0
chr1	154601185	154601726	ENSG00000160710.17	1e-180	-	154601185	154601726	0	1	541,	0
chr1	154602085	154602536	ENSG00000160710.17	1.3e-17	-	154602085	154602536	0	1	451,	0
chr1	154945030	154945575	ENSG00000163346.17	7.8e-05	-	154945030	154945575	0	2	87,4,	0,541
chr1	154945842	154946291	ENSG00000163346.17	3.2e-24	-	154945842	154946291	0	1	449,	0
chr1	154958454	154959736	ENSG00000163348.4	1.6e-80	-	154958454	154959736	0	1	1282,	0
chr1	154961894	154963674	ENSG00000163348.4	2e-24	-	154961894	154963674	0	2	142,156,	0,1624
chr1	154962327	154962508	ENSG00000160691.18	7.4e-08	-	154962327	154962508	0	1	181,	0
chr1	155140186	155140364	ENSG00000179085.7	3.2e-11	-	155140186	155140364	0	1	178,	0
chr1	155236466	155237548	ENSG00000177628.16	6.8e-07	-	155236466	155237548	0	2	3,208,	0,874
chr1	155247564	155247655	ENSG00000160767.21	0.0015	-	155247564	155247655	0	1	91,	0
chr1	155250520	155250671	ENSG00000160767.21	7.6e-10	-	155250520	155250671	0	1	151,	0
chr1	155260535	155261252	ENSG00000116521.11	2.6e-06	-	155260535	155261252	0	2	124,26,	0,691
chr1	155262102	155262341	ENSG00000116521.11	4e-12	-	155262102	155262341	0	1	239,	0
chr1	155273230	155278401	ENSG00000176444.19	6.3e-15	-	155273230	155278401	0	2	274,27,	0,5144
chr1	155321511	155321661	ENSG00000225855.7	0.00065	-	155321511	155321661	0	1	150,	0
chr1	155438454	155438964	ENSG00000116539.13	3.2e-14	-	155438454	155438964	0	1	510,	0
chr1	155477887	155478427	ENSG00000116539.13	1.3e-16	-	155477887	155478427	0	1	540,	0
chr1	155478965	155479085	ENSG00000116539.13	0.00072	-	155478965	155479085	0	1	120,	0
chr1	155481629	155482198	ENSG00000116539.13	6.3e-20	-	155481629	155482198	0	1	569,	0
chr1	155521105	155521405	ENSG00000116539.13	2.5e-26	-	155521105	155521405	0	1	300,	0
chr1	155562357	155562478	ENSG00000116539.13	0.00015	-	155562357	155562478	0	1	121,	0
chr1	155659678	155659947	ENSG00000246203.2	6.3e-25	-	155659678	155659947	0	1	269,	0
chr1	155659682	155659952	ENSG00000163374.19	2.5e-24	-	155659682	155659952	0	1	270,	0
chr1	155660400	155660581	ENSG00000163374.19	2.6e-07	-	155660400	155660581	0	1	181,	0
chr1	155660789	155660880	ENSG00000163374.19	1.8e-05	-	155660789	155660880	0	1	91,	0
chr1	155749721	155749992	ENSG00000116580.18	2e-20	-	155749721	155749992	0	1	271,	0
chr1	155750201	155750622	ENSG00000116580.18	3.2e-40	-	155750201	155750622	0	1	421,	0
chr1	155751954	155752194	ENSG00000116580.18	6.3e-16	-	155751954	155752194	0	1	240,	0
chr1	155752403	155753317	ENSG00000116580.18	6.5e-08	-	155752403	155753317	0	2	187,114,	0,800
chr1	155765022	155765083	ENSG00000116580.18	0.0013	-	155765022	155765083	0	1	61,	0
chr1	155765172	155765803	ENSG00000116580.18	5e-30	-	155765172	155765803	0	1	631,	0
chr1	155766402	155766703	ENSG00000116580.18	2.3e-05	-	155766402	155766703	0	1	301,	0
chr1	155853304	155853485	ENSG00000116580.18	2.7e-07	-	155853304	155853485	0	1	181,	0
chr1	155900349	155900469	ENSG00000143622.11	1.7e-08	-	155900349	155900469	0	1	120,	0
chr1	155913223	155913463	ENSG00000132680.11	1.3e-31	-	155913223	155913463	0	1	240,	0
chr1	155913970	155914150	ENSG00000132680.11	2.5e-16	-	155913970	155914150	0	1	180,	0
chr1	155947718	155950301	ENSG00000116584.18	2e-39	-	155947718	155950301	0	2	297,33,	0,2550
chr1	155951064	155951215	ENSG00000116584.18	1.7e-05	-	155951064	155951215	0	1	151,	0
chr1	156009047	156009287	ENSG00000163479.14	3.2e-43	-	156009047	156009287	0	1	240,	0
chr1	156009436	156009527	ENSG00000163479.14	5.2e-07	-	156009436	156009527	0	1	91,	0
chr1	156035507	156035568	ENSG00000160803.8	0.0036	-	156035507	156035568	0	1	61,	0
chr1	156036104	156036225	ENSG00000160803.8	2.4e-06	-	156036104	156036225	0	1	121,	0
chr1	156053707	156053798	ENSG00000160803.8	0.0012	-	156053707	156053798	0	1	91,	0
chr1	156076266	156077585	ENSG00000254726.3	1e-136	-	156076266	156077585	0	1	1319,	0
chr1	156081685	156081896	ENSG00000254726.3	1.6e-05	-	156081685	156081896	0	1	211,	0
chr1	156082194	156082465	ENSG00000254726.3	5e-18	-	156082194	156082465	0	1	271,	0
chr1	156243974	156244034	ENSG00000160781.17	0.0013	-	156243974	156244034	0	1	60,	0
chr1	156250361	156250542	ENSG00000198952.8	6.3e-14	-	156250361	156250542	0	1	181,	0
chr1	156265806	156266316	ENSG00000198952.8	1e-179	-	156265806	156266316	0	1	510,	0
chr1	156282644	156282825	ENSG00000198952.8	1.6e-85	-	156282644	156282825	0	1	181,	0
chr1	156292747	156292957	ENSG00000198715.13	6.9e-06	-	156292747	156292957	0	1	210,	0
chr1	156526123	156526424	ENSG00000183856.11	6.3e-21	-	156526123	156526424	0	1	301,	0
chr1	156539177	156539268	ENSG00000183856.11	0.0017	-	156539177	156539268	0	1	91,	0
chr1	156594606	156594847	ENSG00000160818.16	1e-126	-	156594606	156594847	0	1	241,	0
chr1	156594966	156595626	ENSG00000160818.16	1e-89	-	156594966	156595626	0	1	660,	0
chr1	156669959	156670230	ENSG00000132688.11	8.9e-08	-	156669959	156670230	0	1	271,	0
chr1	156671097	156671427	ENSG00000132688.11	3.9e-10	-	156671097	156671427	0	1	330,	0
chr1	156672264	156672385	ENSG00000132688.11	0.0015	-	156672264	156672385	0	1	121,	0
chr1	156723175	156723445	ENSG00000143319.16	1e-179	-	156723175	156723445	0	1	270,	0
chr1	156725847	156727723	ENSG00000143319.16	0	-	156725847	156727723	0	2	20,818,	0,1058
chr1	156727901	156728171	ENSG00000143319.16	5e-63	-	156727901	156728171	0	1	270,	0
chr1	156728230	156728321	ENSG00000143319.16	4.6e-05	-	156728230	156728321	0	1	91,	0
chr1	156728559	156728799	ENSG00000143319.16	1.6e-49	-	156728559	156728799	0	1	240,	0
chr1	156744184	156744304	ENSG00000143321.19	5.5e-06	-	156744184	156744304	0	1	120,	0
chr1	156752052	156752113	ENSG00000143321.19	2.5e-05	-	156752052	156752113	0	1	61,	0
chr1	156768104	156768165	ENSG00000287624.1	3e-05	-	156768104	156768165	0	1	61,	0
chr1	157124783	157125262	ENSG00000117036.12	6.3e-86	-	157124783	157125262	0	1	479,	0
chr1	157125441	157133176	ENSG00000117036.12	1e-162	-	157125441	157133176	0	2	538,32,	0,7703
chr1	157135686	157138474	ENSG00000117036.12	1.6e-11	-	157135686	157138474	0	3	22,59,159,	0,620,2629
chr1	159920531	159923550	ENSG00000158710.14	4e-18	-	159920531	159923550	0	2	6,115,	0,2904
chr1	160029564	160029715	ENSG00000143315.7	8.7e-06	-	160029564	160029715	0	1	151,	0
chr1	160030163	160030494	ENSG00000143315.7	6.3e-21	-	160030163	160030494	0	1	331,	0
chr1	160030762	160031362	ENSG00000143315.7	1.6e-72	-	160030762	160031362	0	1	600,	0
chr1	160031511	160031931	ENSG00000143315.7	6.3e-12	-	160031511	160031931	0	1	420,	0
chr1	160093039	160093278	ENSG00000162729.14	1.4e-07	-	160093039	160093278	0	1	239,	0
chr1	160217303	160217574	ENSG00000132716.18	5e-30	-	160217303	160217574	0	1	271,	0
chr1	160239458	160240329	ENSG00000132716.18	7.9e-79	-	160239458	160240329	0	1	871,	0
chr1	160262290	160262531	ENSG00000132716.18	2e-11	-	160262290	160262531	0	1	241,	0
chr1	160217315	160217586	ENSG00000258465.8	1.3e-28	-	160217315	160217586	0	1	271,	0
chr1	160239696	160240325	ENSG00000258465.8	1.6e-78	-	160239696	160240325	0	1	629,	0
chr1	160998084	160998385	ENSG00000158769.18	4e-23	-	160998084	160998385	0	1	301,	0
chr1	160998075	160998403	ENSG00000270149.5	5e-21	-	160998075	160998403	0	1	328,	0
chr1	161039460	161039999	ENSG00000158773.14	1e-109	-	161039460	161039999	0	1	539,	0
chr1	161041653	161041773	ENSG00000158773.14	1.8e-05	-	161041653	161041773	0	1	120,	0
chr1	161047724	161047815	ENSG00000186517.14	0.00058	-	161047724	161047815	0	1	91,	0
chr1	161048024	161048474	ENSG00000186517.14	7.9e-31	-	161048024	161048474	0	1	450,	0
chr1	161049192	161049522	ENSG00000186517.14	6.3e-09	-	161049192	161049522	0	2	142,99,	0,231
chr1	161102360	161118055	ENSG00000143256.5	1.9e-09	-	161102360	161118055	0	2	15,104,	0,15591
chr1	161122012	161122339	ENSG00000158796.17	1e-113	-	161122012	161122339	0	1	327,	0
chr1	161124256	161124316	ENSG00000158796.17	0.0017	-	161124256	161124316	0	1	60,	0
chr1	161171548	161171998	ENSG00000158850.15	2.5e-65	-	161171548	161171998	0	1	450,	0
chr1	161229903	161230828	ENSG00000143257.11	1.6e-67	-	161229903	161230828	0	2	23,484,	0,441
chr1	161983678	161983739	ENSG00000162745.10	0.0037	-	161983678	161983739	0	1	61,	0
chr1	166070212	166070333	ENSG00000188859.6	0.0018	-	166070212	166070333	0	1	121,	0
chr1	168084630	168087616	ENSG00000143147.14	4e-74	-	168084630	168087616	0	2	1166,32,	0,2954
chr1	168090560	168096998	ENSG00000143147.14	4e-35	-	168090560	168096998	0	2	108,491,	0,5947
chr1	168137187	168137338	ENSG00000143147.14	0.00018	-	168137187	168137338	0	1	151,	0
chr1	169421687	169421896	ENSG00000117477.12	1.6e-13	-	169421687	169421896	0	1	209,	0
chr1	169422014	169422164	ENSG00000117477.12	8.3e-06	-	169422014	169422164	0	1	150,	0
chr1	172441494	172441794	ENSG00000135845.10	5.6e-07	-	172441494	172441794	0	1	300,	0
chr1	172442331	172442811	ENSG00000135845.10	4e-64	-	172442331	172442811	0	1	480,	0
chr1	173803100	173803341	ENSG00000120334.15	1e-25	-	173803100	173803341	0	1	241,	0
chr1	173823582	173823703	ENSG00000120334.15	3e-05	-	173823582	173823703	0	1	121,	0
chr1	173824301	173824570	ENSG00000120334.15	0.00015	-	173824301	173824570	0	2	172,9,	0,260
chr1	174022146	174022297	ENSG00000135870.11	1e-07	-	174022146	174022297	0	1	151,	0
chr1	175160642	175160703	ENSG00000235750.10	0.0028	-	175160642	175160703	0	1	61,	0
chr1	179107568	179109217	ENSG00000143322.21	7.9e-51	-	179107568	179109217	0	1	1649,	0
chr1	179229294	179229654	ENSG00000143322.21	4e-26	-	179229294	179229654	0	1	360,	0
chr1	179845629	179845749	ENSG00000169905.12	3.7e-08	-	179845629	179845749	0	1	120,	0
chr1	179846018	179846648	ENSG00000169905.12	1e-124	-	179846018	179846648	0	1	630,	0
chr1	179865178	179865808	ENSG00000169905.12	1e-193	-	179865178	179865808	0	1	630,	0
chr1	179882325	179882415	ENSG00000272906.1	0.0026	-	179882325	179882415	0	1	90,	0
chr1	180274865	180275046	ENSG00000230124.8	5.8e-05	-	180274865	180275046	0	1	181,	0
chr1	180502205	180502715	ENSG00000230124.8	7.9e-30	-	180502205	180502715	0	1	510,	0
chr1	180946075	180976482	ENSG00000243155.1	1.3e-52	-	180946075	180976482	0	2	25,365,	0,30042
chr1	180976129	180976610	ENSG00000135823.14	2.5e-54	-	180976129	180976610	0	1	481,	0
chr1	181005435	181022911	ENSG00000135823.14	2.5e-20	-	181005435	181022911	0	2	28,273,	0,17203
chr1	182384364	182384425	ENSG00000135821.18	0.0037	-	182384364	182384425	0	1	61,	0
chr1	182384544	182384605	ENSG00000135821.18	0.003	-	182384544	182384605	0	1	61,	0
chr1	182585864	182586403	ENSG00000135828.11	6.3e-15	-	182585864	182586403	0	1	539,	0
chr1	182598979	182599306	ENSG00000143333.7	1e-88	-	182598979	182599306	0	1	327,	0
chr1	182599811	182600495	ENSG00000143333.7	1e-175	-	182599811	182600495	0	1	684,	0
chr1	182837830	182837890	ENSG00000287808.1	0.00058	-	182837830	182837890	0	1	60,	0
chr1	183250061	183250212	ENSG00000157064.11	0.00027	-	183250061	183250212	0	1	151,	0
chr1	183633084	183633265	ENSG00000162704.16	1.9e-06	-	183633084	183633265	0	1	181,	0
chr1	183633924	183635783	ENSG00000162704.16	3.8e-09	-	183633924	183635783	0	2	34,267,	0,1592
chr1	183935907	183936118	ENSG00000198756.12	1.1e-10	-	183935907	183936118	0	1	211,	0
chr1	184037578	184037729	ENSG00000198756.12	0.00027	-	184037578	184037729	0	1	151,	0
chr1	184694012	184694312	ENSG00000116406.19	2e-15	-	184694012	184694312	0	1	300,	0
chr1	190098105	190098255	ENSG00000162670.11	0.0013	-	190098105	190098255	0	1	150,	0
chr1	190098374	190098644	ENSG00000162670.11	1.3e-07	-	190098374	190098644	0	1	270,	0
chr1	197101318	197101529	ENSG00000066279.18	1.6e-55	-	197101318	197101529	0	1	211,	0
chr1	197102098	197102159	ENSG00000066279.18	0.00042	-	197102098	197102159	0	1	61,	0
chr1	197159516	197159816	ENSG00000177888.7	0.00027	-	197159516	197159816	0	1	300,	0
chr1	200406312	200406492	ENSG00000162702.8	4e-16	-	200406312	200406492	0	1	180,	0
chr1	200407028	200407715	ENSG00000162702.8	6.3e-50	-	200407028	200407715	0	1	687,	0
chr1	200407923	200408044	ENSG00000162702.8	5.1e-05	-	200407923	200408044	0	1	121,	0
chr1	200408192	200408431	ENSG00000162702.8	1.6e-19	-	200408192	200408431	0	1	239,	0
chr1	200408550	200408879	ENSG00000162702.8	1e-21	-	200408550	200408879	0	1	329,	0
chr1	200408938	200410056	ENSG00000162702.8	7.9e-42	-	200408938	200410056	0	2	785,111,	0,1007
chr1	200553558	200553619	ENSG00000118193.12	0.00026	-	200553558	200553619	0	1	61,	0
chr1	200617803	200618103	ENSG00000118193.12	1.3e-13	-	200617803	200618103	0	1	300,	0
chr1	200665953	200666194	ENSG00000118197.14	8.3e-06	-	200665953	200666194	0	1	241,	0
chr1	200666583	200666644	ENSG00000118197.14	0.0028	-	200666583	200666644	0	1	61,	0
chr1	200971399	200971550	ENSG00000116852.14	0.00043	-	200971399	200971550	0	1	151,	0
chr1	201154256	201154377	ENSG00000116857.17	0.00023	-	201154256	201154377	0	1	121,	0
chr1	201464740	201464890	ENSG00000224818.1	7.1e-05	-	201464740	201464890	0	1	150,	0
chr1	201464741	201464891	ENSG00000174307.6	0.00013	-	201464741	201464891	0	1	150,	0
chr1	201465816	201466367	ENSG00000174307.6	4e-39	-	201465816	201466367	0	2	362,57,	0,494
chr1	201468370	201468430	ENSG00000174307.6	0.00074	-	201468370	201468430	0	1	60,	0
chr1	201468549	201468729	ENSG00000174307.6	1.3e-05	-	201468549	201468729	0	1	180,	0
chr1	201468848	201469237	ENSG00000174307.6	7.9e-20	-	201468848	201469237	0	1	389,	0
chr1	201897409	201897470	ENSG00000163431.13	0.0013	-	201897409	201897470	0	1	61,	0
chr1	201897678	201897977	ENSG00000163431.13	6.8e-08	-	201897678	201897977	0	1	299,	0
chr1	201899410	201899709	ENSG00000163431.13	3.2e-13	-	201899410	201899709	0	1	299,	0
chr1	201900126	201900664	ENSG00000163431.13	6.3e-21	-	201900126	201900664	0	1	538,	0
chr1	201946319	201946499	ENSG00000163431.13	2.5e-06	-	201946319	201946499	0	1	180,	0
chr1	202728812	202729113	ENSG00000117139.17	2.5e-47	-	202728812	202729113	0	1	301,	0
chr1	202729802	202730073	ENSG00000117139.17	4e-16	-	202729802	202730073	0	1	271,	0
chr1	202733371	202733552	ENSG00000117139.17	8.1e-05	-	202733371	202733552	0	1	181,	0
chr1	202852275	202852455	ENSG00000214796.8	4.1e-06	-	202852275	202852455	0	1	180,	0
chr1	202852663	202853232	ENSG00000214796.8	7.9e-45	-	202852663	202853232	0	1	569,	0
chr1	202857649	202857991	ENSG00000214796.8	2.3e-09	-	202857649	202857991	0	2	146,64,	0,278
chr1	202880875	202881146	ENSG00000183155.4	3.2e-37	-	202880875	202881146	0	1	271,	0
chr1	202941244	202941365	ENSG00000159346.13	1.6e-07	-	202941244	202941365	0	1	121,	0
chr1	204222294	204222415	ENSG00000143850.15	0.0019	-	204222294	204222415	0	1	121,	0
chr1	204406039	204410114	ENSG00000158615.9	2.5e-39	-	204406039	204410114	0	2	274,623,	0,3452
chr1	204410591	204411548	ENSG00000158615.9	1.6e-67	-	204410591	204411548	0	1	957,	0
chr1	204424576	204424756	ENSG00000133056.13	2e-08	-	204424576	204424756	0	1	180,	0
chr1	204468928	204469739	ENSG00000133056.13	5e-23	-	204468928	204469739	0	1	811,	0
chr1	204617319	204617499	ENSG00000170382.12	0.00046	-	204617319	204617499	0	1	180,	0
chr1	204617588	204617858	ENSG00000170382.12	2.3e-07	-	204617588	204617858	0	1	270,	0
chr1	204618366	204618546	ENSG00000170382.12	1.5e-05	-	204618366	204618546	0	1	180,	0
chr1	204619084	204619444	ENSG00000170382.12	8.7e-07	-	204619084	204619444	0	1	360,	0
chr1	204619712	204619803	ENSG00000170382.12	0.00066	-	204619712	204619803	0	1	91,	0
chr1	205083513	205083987	ENSG00000174529.7	2.5e-33	-	205083513	205083987	0	1	474,	0
chr1	205088627	205088688	ENSG00000117222.14	2.9e-05	-	205088627	205088688	0	1	61,	0
chr1	205147265	205147595	ENSG00000133059.17	5e-73	-	205147265	205147595	0	1	330,	0
chr1	205169242	205169722	ENSG00000133059.17	1.3e-73	-	205169242	205169722	0	1	480,	0
chr1	205187429	205211283	ENSG00000133059.17	5e-23	-	205187429	205211283	0	2	377,13,	0,23841
chr1	205211491	205211702	ENSG00000133059.17	1.6e-13	-	205211491	205211702	0	1	211,	0
chr1	205302327	205302568	ENSG00000163545.9	8.7e-07	-	205302327	205302568	0	1	241,	0
chr1	205302985	205303226	ENSG00000163545.9	1.2e-05	-	205302985	205303226	0	1	241,	0
chr1	205303404	205303824	ENSG00000163545.9	4.1e-08	-	205303404	205303824	0	1	420,	0
chr1	205619981	205620761	ENSG00000158711.13	1.3e-30	-	205619981	205620761	0	1	780,	0
chr1	205663123	205663481	ENSG00000158715.6	7.9e-16	-	205663123	205663481	0	1	358,	0
chr1	205750091	205750182	ENSG00000069275.13	6.3e-11	-	205750091	205750182	0	1	91,	0
chr1	205769356	205769654	ENSG00000117280.13	3.2e-82	-	205769356	205769654	0	1	298,	0
chr1	205801013	205810424	ENSG00000133065.11	1.6e-18	-	205801013	205810424	0	3	47,168,355,	0,307,9056
chr1	205810633	205811053	ENSG00000133065.11	1e-12	-	205810633	205811053	0	1	420,	0
chr1	205812922	205813072	ENSG00000133065.11	2.1e-07	-	205812922	205813072	0	1	150,	0
chr1	207048574	207049173	ENSG00000180667.10	2e-10	-	207048574	207049173	0	1	599,	0
chr1	207049231	207049561	ENSG00000180667.10	5e-41	-	207049231	207049561	0	1	330,	0
chr1	208216776	208217196	ENSG00000076356.7	1e-28	-	208216776	208217196	0	1	420,	0
chr1	208217645	208230283	ENSG00000076356.7	1.3e-09	-	208217645	208230283	0	2	357,93,	0,12545
chr1	208243724	208243964	ENSG00000076356.7	2.2e-05	-	208243724	208243964	0	1	240,	0
chr1	208244023	208244324	ENSG00000076356.7	2.5e-06	-	208244023	208244324	0	1	301,	0
chr1	209782786	209783593	ENSG00000162757.4	1e-30	-	209782786	209783593	0	1	807,	0
chr1	211575605	211575785	ENSG00000170385.10	0.00023	-	211575605	211575785	0	1	180,	0
chr1	211578502	211579131	ENSG00000170385.10	3.2e-17	-	211578502	211579131	0	1	629,	0
chr1	211941714	211942044	ENSG00000143493.13	2e-20	-	211941714	211942044	0	1	330,	0
chr1	212364941	212365150	ENSG00000065600.12	1.1e-07	-	212364941	212365150	0	1	209,	0
chr1	212686565	212697131	ENSG00000123685.9	3.2e-27	-	212686565	212697131	0	3	414,43,171,	0,901,10395
chr1	212699690	212699840	ENSG00000123685.9	1.4e-07	-	212699690	212699840	0	1	150,	0
chr1	212726481	212727171	ENSG00000117697.15	7.9e-21	-	212726481	212727171	0	1	690,	0
chr1	212738371	212738581	ENSG00000117697.15	2.5e-18	-	212738371	212738581	0	1	210,	0
chr1	212855830	212855891	ENSG00000198468.9	0.0079	-	212855830	212855891	0	1	61,	0
chr1	212857054	212857145	ENSG00000198468.9	0.00018	-	212857054	212857145	0	1	91,	0
chr1	213001893	213001953	ENSG00000174606.14	0.0038	-	213001893	213001953	0	1	60,	0
chr1	214378099	214384596	ENSG00000152104.12	2e-15	-	214378099	214384596	0	2	3,1286,	0,5211
chr1	217431156	217431247	ENSG00000092978.11	0.0026	-	217431156	217431247	0	1	91,	0
chr1	217619864	217620344	ENSG00000092978.11	5e-81	-	217619864	217620344	0	1	480,	0
chr1	219915438	219915499	ENSG00000196660.10	0.0026	-	219915438	219915499	0	1	61,	0
chr1	220266505	220266626	ENSG00000118873.16	2.6e-05	-	220266505	220266626	0	1	121,	0
chr1	220266865	220266926	ENSG00000118873.16	0.0013	-	220266865	220266926	0	1	61,	0
chr1	220266764	220266913	ENSG00000213033.4	0.00058	-	220266764	220266913	0	1	149,	0
chr1	223780609	223780849	ENSG00000143514.17	6.3e-28	-	223780609	223780849	0	1	240,	0
chr1	223795966	223796326	ENSG00000143514.17	3.2e-15	-	223795966	223796326	0	1	360,	0
chr1	223951572	223951901	ENSG00000272645.3	7.9e-15	-	223951572	223951901	0	1	329,	0
chr1	224389490	224389851	ENSG00000162923.16	1e-139	-	224389490	224389851	0	1	361,	0
chr1	224433712	224435804	ENSG00000162923.16	1.3e-63	-	224433712	224435804	0	2	1082,88,	0,2004
chr1	225487134	225487404	ENSG00000154380.17	5e-71	-	225487134	225487404	0	1	270,	0
chr1	225497502	225498367	ENSG00000154380.17	1.6e-68	-	225497502	225498367	0	2	310,21,	0,844
chr1	225517639	225517820	ENSG00000154380.17	0.0005	-	225517639	225517820	0	1	181,	0
chr1	225519172	225519532	ENSG00000154380.17	1.3e-56	-	225519172	225519532	0	1	360,	0
chr1	225652871	225653082	ENSG00000154380.17	1.5e-10	-	225652871	225653082	0	1	211,	0
chr1	225846555	225846706	ENSG00000196187.12	6.6e-05	-	225846555	225846706	0	1	151,	0
chr1	225920055	225920294	ENSG00000143811.19	2.5e-11	-	225920055	225920294	0	1	239,	0
chr1	225985248	225988311	ENSG00000143751.10	1e-191	-	225985248	225988311	0	2	275,416,	0,2647
chr1	226146681	226152554	ENSG00000182827.9	1e-106	-	226146681	226152554	0	2	140,220,	0,5653
chr1	226308877	226309154	ENSG00000183814.15	9.3e-09	-	226308877	226309154	0	2	194,46,	0,231
chr1	226407942	226408093	ENSG00000143799.13	2e-60	-	226407942	226408093	0	1	151,	0
chr1	226735670	226737108	ENSG00000143772.9	3.2e-36	-	226735670	226737108	0	1	1438,	0
chr1	226993999	226994180	ENSG00000143776.18	4.5e-09	-	226993999	226994180	0	1	181,	0
chr1	227028768	227029188	ENSG00000143776.18	6.3e-17	-	227028768	227029188	0	1	420,	0
chr1	227317664	227317995	ENSG00000143776.18	1.6e-73	-	227317664	227317995	0	1	331,	0
chr1	227318323	227318414	ENSG00000143776.18	0.00021	-	227318323	227318414	0	1	91,	0
chr1	227731413	227732906	ENSG00000081692.12	1e-266	-	227731413	227732906	0	2	1263,26,	0,1467
chr1	227733174	227733295	ENSG00000081692.12	9.3e-06	-	227733174	227733295	0	1	121,	0
chr1	227734103	227734314	ENSG00000081692.12	1e-10	-	227734103	227734314	0	1	211,	0
chr1	227734373	227735052	ENSG00000081692.12	9.3e-09	-	227734373	227735052	0	3	4,166,41,	0,277,638
chr1	228100904	228101234	ENSG00000143793.13	7.9e-28	-	228100904	228101234	0	1	330,	0
chr1	228101497	228101588	ENSG00000143793.13	1.8e-07	-	228101497	228101588	0	1	91,	0
chr1	228102065	228102664	ENSG00000143793.13	8.3e-09	-	228102065	228102664	0	1	599,	0
chr1	228103765	228103975	ENSG00000143793.13	1.3e-05	-	228103765	228103975	0	1	210,	0
chr1	228104124	228104723	ENSG00000143793.13	2.5e-35	-	228104124	228104723	0	1	599,	0
chr1	228105081	228105351	ENSG00000143793.13	4.1e-06	-	228105081	228105351	0	1	270,	0
chr1	228106678	228106829	ENSG00000162910.19	1.6e-16	-	228106678	228106829	0	1	151,	0
chr1	228212790	228213484	ENSG00000162913.10	5.8e-06	-	228212790	228213484	0	2	117,63,	0,631
chr1	228394092	228394213	ENSG00000154370.16	0.00024	-	228394092	228394213	0	1	121,	0
chr1	228394332	228395993	ENSG00000154370.16	1e-186	-	228394332	228395993	0	2	920,460,	0,1201
chr1	228396352	228396683	ENSG00000154370.16	6.2e-09	-	228396352	228396683	0	1	331,	0
chr1	228396742	228397073	ENSG00000154370.16	1.3e-22	-	228396742	228397073	0	1	331,	0
chr1	228406444	228406715	ENSG00000154370.16	3.2e-16	-	228406444	228406715	0	1	271,	0
chr1	228457157	228457396	ENSG00000181218.5	3.2e-27	-	228457157	228457396	0	1	239,	0
chr1	229092930	229093021	ENSG00000236975.2	0.0019	-	229092930	229093021	0	1	91,	0
chr1	229093079	229093200	ENSG00000236975.2	0.00011	-	229093079	229093200	0	1	121,	0
chr1	229257489	229257550	ENSG00000177788.6	0.0012	-	229257489	229257550	0	1	61,	0
chr1	229268264	229268355	ENSG00000177788.6	0.0011	-	229268264	229268355	0	1	91,	0
chr1	229268503	229268803	ENSG00000177788.6	2.5e-20	-	229268503	229268803	0	1	300,	0
chr1	229269251	229269521	ENSG00000177788.6	6.3e-15	-	229269251	229269521	0	1	270,	0
chr1	229325051	229325321	ENSG00000154429.11	2.5e-37	-	229325051	229325321	0	1	270,	0
chr1	229326856	229327066	ENSG00000154429.11	1e-10	-	229326856	229327066	0	1	210,	0
chr1	229342270	229342965	ENSG00000154429.11	1.1e-09	-	229342270	229342965	0	2	247,54,	0,641
chr1	229518073	229518253	ENSG00000135776.5	3.4e-07	-	229518073	229518253	0	1	180,	0
chr1	229593230	229593291	ENSG00000135801.9	0.0012	-	229593230	229593291	0	1	61,	0
chr1	229593949	229599247	ENSG00000135801.9	4e-95	-	229593949	229599247	0	2	1145,54,	0,5244
chr1	229602182	229602692	ENSG00000135801.9	4e-22	-	229602182	229602692	0	1	510,	0
chr1	229625896	229626047	ENSG00000135801.9	2.5e-06	-	229625896	229626047	0	1	151,	0
chr1	230280810	230280899	ENSG00000224407.1	0.00018	-	230280810	230280899	0	1	89,	0
chr1	230322093	230322363	ENSG00000177614.11	5e-28	-	230322093	230322363	0	1	270,	0
chr1	230322572	230322752	ENSG00000177614.11	5.8e-05	-	230322572	230322752	0	1	180,	0
chr1	230322811	230323561	ENSG00000177614.11	6.3e-77	-	230322811	230323561	0	1	750,	0
chr1	230356976	230357126	ENSG00000177614.11	3.5e-06	-	230356976	230357126	0	1	150,	0
chr1	230425942	230426003	ENSG00000177614.11	0.0017	-	230425942	230426003	0	1	61,	0
chr1	230693395	230693604	ENSG00000286859.1	5e-09	-	230693395	230693604	0	1	209,	0
chr1	230838908	230839058	ENSG00000119280.16	3.2e-12	-	230838908	230839058	0	1	150,	0
chr1	230843456	230843636	ENSG00000119280.16	1.6e-05	-	230843456	230843636	0	1	180,	0
chr1	231019639	231020055	ENSG00000182118.8	1e-101	-	231019639	231020055	0	1	416,	0
chr1	231019827	231019924	ENSG00000283799.1	3.2e-18	-	231019827	231019924	0	1	97,	0
chr1	231224211	231224301	ENSG00000143633.13	2.6e-05	-	231224211	231224301	0	1	90,	0
chr1	231335541	231337852	ENSG00000116903.7	1e-204	-	231335541	231337852	0	1	2311,	0
chr1	231421001	231422287	ENSG00000135766.9	5e-25	-	231421001	231422287	0	1	1286,	0
chr1	232514049	232514320	ENSG00000116991.10	5e-18	-	232514049	232514320	0	1	271,	0
chr1	232514978	232515249	ENSG00000116991.10	3.9e-10	-	232514978	232515249	0	1	271,	0
chr1	232983884	232984455	ENSG00000135749.19	5e-13	-	232983884	232984455	0	1	571,	0
chr1	232984574	232984755	ENSG00000135749.19	0.00069	-	232984574	232984755	0	1	181,	0
chr1	232985683	232985774	ENSG00000135749.19	0.0029	-	232985683	232985774	0	1	91,	0
chr1	232985863	232986164	ENSG00000135749.19	7.1e-07	-	232985863	232986164	0	1	301,	0
chr1	233258128	233259178	ENSG00000135749.19	1.3e-68	-	233258128	233259178	0	1	1050,	0
chr1	234478190	234478969	ENSG00000059588.10	1.3e-14	-	234478190	234478969	0	1	779,	0
chr1	234606988	234607766	ENSG00000168264.10	0	-	234606988	234607766	0	1	778,	0
chr1	234608478	234609525	ENSG00000168264.10	6.3e-40	-	234608478	234609525	0	1	1047,	0
chr1	235131752	235131932	ENSG00000188739.15	2.5e-13	-	235131752	235131932	0	1	180,	0
chr1	235131723	235131933	ENSG00000054267.22	6.3e-14	-	235131723	235131933	0	1	210,	0
chr1	235181940	235182300	ENSG00000054267.22	3.2e-73	-	235181940	235182300	0	1	360,	0
chr1	235213918	235213979	ENSG00000054267.22	0.00071	-	235213918	235213979	0	1	61,	0
chr1	235808899	235808960	ENSG00000143669.13	0.0012	-	235808899	235808960	0	1	61,	0
chr1	235810099	235810160	ENSG00000143669.13	0.0026	-	235810099	235810160	0	1	61,	0
chr1	236218399	236218549	ENSG00000086619.13	0.00016	-	236218399	236218549	0	1	150,	0
chr1	236536475	236536704	ENSG00000273058.2	1.6e-12	-	236536475	236536704	0	1	229,	0
chr1	241633999	241634478	ENSG00000203668.2	6.3e-11	-	241633999	241634478	0	1	479,	0
chr1	241634537	241634807	ENSG00000203668.2	1e-08	-	241634537	241634807	0	1	270,	0
chr1	241635166	241635376	ENSG00000203668.2	2.5e-06	-	241635166	241635376	0	1	210,	0
chr1	241635435	241635885	ENSG00000203668.2	1.3e-22	-	241635435	241635885	0	1	450,	0
chr1	243056544	243056694	ENSG00000214837.8	0.0012	-	243056544	243056694	0	1	150,	0
chr1	243164513	243164784	ENSG00000143702.16	1.6e-43	-	243164513	243164784	0	1	271,	0
chr1	243165083	243165234	ENSG00000143702.16	0.00065	-	243165083	243165234	0	1	151,	0
chr1	243165652	243165953	ENSG00000143702.16	1.3e-19	-	243165652	243165953	0	1	301,	0
chr1	243185931	243186111	ENSG00000143702.16	3.2e-06	-	243185931	243186111	0	1	180,	0
chr1	243191228	243191319	ENSG00000143702.16	0.0034	-	243191228	243191319	0	1	91,	0
chr1	244854355	244854506	ENSG00000153187.20	2e-24	-	244854355	244854506	0	1	151,	0
chr1	244862670	244862851	ENSG00000153187.20	6.3e-13	-	244862670	244862851	0	1	181,	0
chr1	244863690	244864200	ENSG00000153187.20	1e-148	-	244863690	244864200	0	1	510,	0
chr1	244864319	244864560	ENSG00000153187.20	6.3e-63	-	244864319	244864560	0	1	241,	0
chr1	246849745	246849896	ENSG00000153207.15	1.6e-06	-	246849745	246849896	0	1	151,	0
chr1	246850975	246851246	ENSG00000153207.15	6.8e-08	-	246850975	246851246	0	1	271,	0
chr1	246986671	246986911	ENSG00000197472.15	2.5e-05	-	246986671	246986911	0	1	240,	0
chr1	246988013	246988073	ENSG00000197472.15	0.0018	-	246988013	246988073	0	1	60,	0
chr1	247100381	247100442	ENSG00000188295.14	0.00022	-	247100381	247100442	0	1	61,	0
chr1	247100531	247100981	ENSG00000188295.14	3.2e-08	-	247100531	247100981	0	1	450,	0
chr1	247189940	247190001	ENSG00000227671.4	0.0026	-	247189940	247190001	0	1	61,	0
chr1	247190180	247190301	ENSG00000227671.4	0.00083	-	247190180	247190301	0	1	121,	0
chr1	247190510	247190601	ENSG00000227671.4	0.00066	-	247190510	247190601	0	1	91,	0
chr1	247299954	247308619	ENSG00000162714.12	1e-187	-	247299954	247308619	0	2	1322,145,	0,8520
chr1	247328820	247329322	ENSG00000162714.12	1.3e-07	-	247328820	247329322	0	2	46,134,	0,368
chr1	248810445	248810596	ENSG00000175137.11	2.5e-06	-	248810445	248810596	0	1	151,	0
chr1	248811374	248811525	ENSG00000175137.11	8.5e-06	-	248811374	248811525	0	1	151,	0
chr1	248811853	248812334	ENSG00000175137.11	7.9e-53	-	248811853	248812334	0	1	481,	0
chr1	248850005	248850306	ENSG00000171163.15	2e-25	-	248850005	248850306	0	1	301,	0
chr1	248858516	248858847	ENSG00000171163.15	4.2e-05	-	248858516	248858847	0	1	331,	0
chr2	3379794	3388705	ENSG00000171853.16	1e-27	+	3379794	3388705	0	2	82,1086,	0,7825
chr2	3561454	3561545	ENSG00000234171.3	0.00013	+	3561454	3561545	0	1	91,	0
chr2	8683006	8684072	ENSG00000115738.10	3.2e-80	+	8683006	8684072	0	2	1,388,	0,678
chr2	10047804	10048461	ENSG00000172059.11	3.2e-29	+	10047804	10048461	0	1	657,	0
chr2	10052479	10052629	ENSG00000172059.11	3.8e-05	+	10052479	10052629	0	1	150,	0
chr2	10210497	10210798	ENSG00000171848.15	1e-16	+	10210497	10210798	0	1	301,	0
chr2	10211156	10211336	ENSG00000171848.15	4e-07	+	10211156	10211336	0	1	180,	0
chr2	10425141	10425232	ENSG00000115756.13	0.0012	+	10425141	10425232	0	1	91,	0
chr2	10449196	10449377	ENSG00000257135.7	3.6e-05	+	10449196	10449377	0	1	181,	0
chr2	10450517	10450607	ENSG00000257135.7	0.0012	+	10450517	10450607	0	1	90,	0
chr2	10691801	10691921	ENSG00000243819.4	0.00027	+	10691801	10691921	0	1	120,	0
chr2	10913748	10914195	ENSG00000162975.5	2e-43	+	10913748	10914195	0	1	447,	0
chr2	11591761	11591912	ENSG00000196208.14	0.00012	+	11591761	11591912	0	1	151,	0
chr2	11640391	11640751	ENSG00000196208.14	4e-49	+	11640391	11640751	0	1	360,	0
chr2	17781367	17781518	ENSG00000178295.15	3.6e-05	+	17781367	17781518	0	1	151,	0
chr2	17783853	17784244	ENSG00000178295.15	1.6e-41	+	17783853	17784244	0	1	391,	0
chr2	20447132	20448882	ENSG00000143878.9	0	+	20447132	20448882	0	1	1750,	0
chr2	20667473	20671536	ENSG00000143869.7	1e-64	+	20667473	20671536	0	2	157,1073,	0,2990
chr2	20677593	20677684	ENSG00000143869.7	8.3e-05	+	20677593	20677684	0	1	91,	0
chr2	20677893	20677984	ENSG00000143869.7	0.0013	+	20677893	20677984	0	1	91,	0
chr2	23696569	23696659	ENSG00000119771.15	0.00011	+	23696569	23696659	0	1	90,	0
chr2	23697048	23697228	ENSG00000119771.15	1.7e-05	+	23697048	23697228	0	1	180,	0
chr2	23706604	23706815	ENSG00000119771.15	7.4e-08	+	23706604	23706815	0	1	211,	0
chr2	23707113	23707353	ENSG00000119771.15	1.5e-07	+	23707113	23707353	0	1	240,	0
chr2	23999720	24000051	ENSG00000173960.14	4e-39	+	23999720	24000051	0	1	331,	0
chr2	24023248	24023309	ENSG00000205639.11	0.0051	+	24023248	24023309	0	1	61,	0
chr2	24095328	24095418	ENSG00000219626.9	0.0015	+	24095328	24095418	0	1	90,	0
chr2	24095567	24095806	ENSG00000219626.9	2.8e-09	+	24095567	24095806	0	1	239,	0
chr2	24707268	24707719	ENSG00000084676.15	3.2e-21	+	24707268	24707719	0	1	451,	0
chr2	24768273	24768514	ENSG00000084676.15	2e-21	+	24768273	24768514	0	1	241,	0
chr2	24769682	24769743	ENSG00000084676.15	8.3e-05	+	24769682	24769743	0	1	61,	0
chr2	24769862	24770163	ENSG00000084676.15	1e-13	+	24769862	24770163	0	1	301,	0
chr2	24819467	24820457	ENSG00000138092.11	4e-96	+	24819467	24820457	0	1	990,	0
chr2	24820606	24820847	ENSG00000138092.11	1.3e-11	+	24820606	24820847	0	1	241,	0
chr2	24821805	24821896	ENSG00000138092.11	0.00081	+	24821805	24821896	0	1	91,	0
chr2	24825789	24826029	ENSG00000271936.1	1.2e-06	+	24825789	24826029	0	1	240,	0
chr2	24826237	24826567	ENSG00000271936.1	1.6e-34	+	24826237	24826567	0	1	330,	0
chr2	25154458	25154818	ENSG00000084710.14	1.6e-14	+	25154458	25154818	0	1	360,	0
chr2	26034083	26034234	ENSG00000084733.11	2e-07	+	26034083	26034234	0	1	151,	0
chr2	26184355	26184505	ENSG00000157833.13	0.00013	+	26184355	26184505	0	1	150,	0
chr2	26184684	26185043	ENSG00000157833.13	6.3e-28	+	26184684	26185043	0	1	359,	0
chr2	26185102	26186253	ENSG00000157833.13	8.3e-06	+	26185102	26186253	0	2	174,65,	0,1086
chr2	26186342	26187454	ENSG00000157833.13	3.3e-05	+	26186342	26187454	0	2	16,224,	0,888
chr2	26187781	26188708	ENSG00000157833.13	7.9e-49	+	26187781	26188708	0	1	927,	0
chr2	26389133	26389313	ENSG00000138018.18	5e-12	+	26389133	26389313	0	1	180,	0
chr2	26778133	26778670	ENSG00000213699.9	1e-112	+	26778133	26778670	0	1	537,	0
chr2	26780992	26781171	ENSG00000213699.9	5e-14	+	26780992	26781171	0	1	179,	0
chr2	26947321	26947382	ENSG00000157851.17	0.00098	+	26947321	26947382	0	1	61,	0
chr2	26948041	26948222	ENSG00000157851.17	3.5e-08	+	26948041	26948222	0	1	181,	0
chr2	27032939	27033119	ENSG00000119777.20	6e-08	+	27032939	27033119	0	1	180,	0
chr2	27040735	27040886	ENSG00000119777.20	7.9e-11	+	27040735	27040886	0	1	151,	0
chr2	27051663	27051924	ENSG00000084693.16	5.4e-05	+	27051663	27051924	0	2	130,20,	0,241
chr2	27082211	27083261	ENSG00000138080.13	1.6e-16	+	27082211	27083261	0	1	1050,	0
chr2	27083380	27086168	ENSG00000138080.13	3.2e-17	+	27083380	27086168	0	5	646,117,18,138,491,	0,1034,1610,1779,2297
chr2	27087164	27087315	ENSG00000138030.13	3e-05	+	27087164	27087315	0	1	151,	0
chr2	27212115	27212353	ENSG00000138085.16	3.8e-10	+	27212115	27212353	0	1	238,	0
chr2	27356814	27357912	ENSG00000234072.1	5e-18	+	27356814	27357912	0	3	42,153,105,	0,325,993
chr2	27358689	27359049	ENSG00000234072.1	2.5e-35	+	27358689	27359049	0	1	360,	0
chr2	27359556	27359617	ENSG00000234072.1	1.5e-05	+	27359556	27359617	0	1	61,	0
chr2	27359676	27359976	ENSG00000234072.1	2.5e-27	+	27359676	27359976	0	1	300,	0
chr2	27377295	27377535	ENSG00000115234.11	2e-20	+	27377295	27377535	0	1	240,	0
chr2	27581280	27581461	ENSG00000221843.4	0.00012	+	27581280	27581461	0	1	181,	0
chr2	27581670	27581731	ENSG00000221843.4	0.0055	+	27581670	27581731	0	1	61,	0
chr2	27581909	27582030	ENSG00000221843.4	0.00083	+	27581909	27582030	0	1	121,	0
chr2	27650189	27650340	ENSG00000198522.13	1.5e-06	+	27650189	27650340	0	1	151,	0
chr2	27664098	27664279	ENSG00000163798.13	1.1e-05	+	27664098	27664279	0	1	181,	0
chr2	28411953	28412104	ENSG00000075426.12	2.8e-06	+	28411953	28412104	0	1	151,	0
chr2	28412342	28412823	ENSG00000075426.12	1.6e-15	+	28412342	28412823	0	1	481,	0
chr2	28413031	28413212	ENSG00000075426.12	3.9e-06	+	28413031	28413212	0	1	181,	0
chr2	28751969	28752060	ENSG00000213639.10	2.6e-05	+	28751969	28752060	0	1	91,	0
chr2	28946631	28947021	ENSG00000163811.12	4e-35	+	28946631	28947021	0	1	390,	0
chr2	31266304	31266545	ENSG00000013016.16	4e-06	+	31266304	31266545	0	1	241,	0
chr2	31267832	31267893	ENSG00000013016.16	0.0016	+	31267832	31267893	0	1	61,	0
chr2	32220553	32220823	ENSG00000152683.14	1.9e-07	+	32220553	32220823	0	1	270,	0
chr2	32357027	32357208	ENSG00000115760.14	6e-07	+	32357027	32357208	0	1	181,	0
chr2	32415011	32415221	ENSG00000115760.14	1.2e-10	+	32415011	32415221	0	1	210,	0
chr2	32415460	32415611	ENSG00000115760.14	2.8e-10	+	32415460	32415611	0	1	151,	0
chr2	32415849	32416090	ENSG00000115760.14	1.1e-06	+	32415849	32416090	0	1	241,	0
chr2	36355807	36356436	ENSG00000150938.10	3.2e-13	+	36355807	36356436	0	1	629,	0
chr2	37248280	37248401	ENSG00000003509.16	4.8e-05	+	37248280	37248401	0	1	121,	0
chr2	38734362	38734720	ENSG00000143891.17	6.3e-27	+	38734362	38734720	0	1	358,	0
chr2	38779430	38781984	ENSG00000152147.11	1e-205	+	38779430	38781984	0	2	11,468,	0,2086
chr2	38784135	38784315	ENSG00000152147.11	5.6e-08	+	38784135	38784315	0	1	180,	0
chr2	42329823	42330213	ENSG00000143924.19	5e-26	+	42329823	42330213	0	1	390,	0
chr2	44201343	44201914	ENSG00000138032.21	1.6e-88	+	44201343	44201914	0	1	571,	0
chr2	44201356	44201922	ENSG00000285542.1	2e-87	+	44201356	44201922	0	1	566,	0
chr2	44944967	44945117	ENSG00000138083.5	0.00012	+	44944967	44945117	0	1	150,	0
chr2	45651344	45652064	ENSG00000171132.14	5e-19	+	45651344	45652064	0	1	720,	0
chr2	46184993	46185204	ENSG00000171132.14	0.00018	+	46184993	46185204	0	1	211,	0
chr2	46185263	46185473	ENSG00000171132.14	7.6e-05	+	46185263	46185473	0	1	210,	0
chr2	46384814	46384874	ENSG00000116016.14	0.00032	+	46384814	46384874	0	1	60,	0
chr2	46580983	46581133	ENSG00000119729.12	4.9e-10	+	46580983	46581133	0	1	150,	0
chr2	46758562	46758682	ENSG00000171150.9	5.9e-05	+	46758562	46758682	0	1	120,	0
chr2	46758861	46759160	ENSG00000171150.9	4.7e-10	+	46758861	46759160	0	1	299,	0
chr2	46759369	46759878	ENSG00000171150.9	2e-18	+	46759369	46759878	0	1	509,	0
chr2	46779884	46779945	ENSG00000171150.9	0.0055	+	46779884	46779945	0	1	61,	0
chr2	47798782	47798933	ENSG00000116062.15	7.4e-08	+	47798782	47798933	0	1	151,	0
chr2	47799201	47799562	ENSG00000116062.15	1e-38	+	47799201	47799562	0	1	361,	0
chr2	47800160	47800221	ENSG00000116062.15	0.00081	+	47800160	47800221	0	1	61,	0
chr2	47800639	47801209	ENSG00000116062.15	1e-137	+	47800639	47801209	0	1	570,	0
chr2	47807794	47808034	ENSG00000116062.15	1.3e-15	+	47807794	47808034	0	1	240,	0
chr2	48346239	48346600	ENSG00000170802.16	5e-47	+	48346239	48346600	0	1	361,	0
chr2	48375311	48375431	ENSG00000170802.16	1.7e-06	+	48375311	48375431	0	1	120,	0
chr2	48580832	48580983	ENSG00000243244.6	1.3e-07	+	48580832	48580983	0	1	151,	0
chr2	48582032	48582093	ENSG00000243244.6	0.0051	+	48582032	48582093	0	1	61,	0
chr2	48580813	48580993	ENSG00000068781.21	1.9e-07	+	48580813	48580993	0	1	180,	0
chr2	48582005	48582096	ENSG00000068781.21	0.0051	+	48582005	48582096	0	1	91,	0
chr2	53970837	53971077	ENSG00000170634.13	5.6e-10	+	53970837	53971077	0	1	240,	0
chr2	54115476	54115626	ENSG00000170634.13	2.5e-05	+	54115476	54115626	0	1	150,	0
chr2	54456436	54515795	ENSG00000115306.16	1.5e-05	+	54456436	54515795	0	3	82,47,52,	0,824,59307
chr2	54558531	54558831	ENSG00000115306.16	5e-36	+	54558531	54558831	0	1	300,	0
chr2	54624822	54626032	ENSG00000115306.16	5.2e-06	+	54624822	54626032	0	2	140,101,	0,1109
chr2	54629085	54629685	ENSG00000115306.16	1.3e-13	+	54629085	54629685	0	1	600,	0
chr2	54630987	54631498	ENSG00000115306.16	2e-30	+	54630987	54631498	0	1	511,	0
chr2	54649619	54649980	ENSG00000115306.16	1e-19	+	54649619	54649980	0	1	361,	0
chr2	54659974	54660155	ENSG00000115306.16	2.5e-11	+	54659974	54660155	0	1	181,	0
chr2	54723618	54724563	ENSG00000214595.11	3.9e-05	+	54723618	54724563	0	2	159,22,	0,923
chr2	55224279	55225192	ENSG00000227799.1	7.9e-19	+	55224279	55225192	0	2	231,487,	0,426
chr2	55284223	55284284	ENSG00000162997.15	0.0019	+	55284223	55284284	0	1	61,	0
chr2	55617995	55618112	ENSG00000272606.1	0.0018	+	55617995	55618112	0	1	117,	0
chr2	58046794	58046950	ENSG00000028116.17	0.0026	+	58046794	58046950	0	2	74,76,	0,80
chr2	58159500	58159651	ENSG00000028116.17	8.7e-06	+	58159500	58159651	0	1	151,	0
chr2	60922130	60922371	ENSG00000162924.14	4e-19	+	60922130	60922371	0	1	241,	0
chr2	60928699	60929120	ENSG00000162924.14	1.7e-06	+	60928699	60929120	0	1	421,	0
chr2	60929209	60929420	ENSG00000162924.14	5.1e-07	+	60929209	60929420	0	1	211,	0
chr2	60929479	60929600	ENSG00000162924.14	0.0038	+	60929479	60929600	0	1	121,	0
chr2	60928714	60929133	ENSG00000267520.2	1.7e-06	+	60928714	60929133	0	1	419,	0
chr2	60929191	60929401	ENSG00000267520.2	1.5e-07	+	60929191	60929401	0	1	210,	0
chr2	60929460	60929580	ENSG00000267520.2	0.0038	+	60929460	60929580	0	1	120,	0
[truncated: 18,765 more rows]

## Sheet: MeRIP_2
chr	chromStart	chromEnd	name	score	strand	thickStart	thickEnd	itemRgb	blockCount	blockSizes	blockStarts
chr1	842239	842390	ENSG00000228794.9	6.2e-05	+	842239	842390	0	1	151,	0
chr1	843048	843229	ENSG00000228794.9	0.00043	+	843048	843229	0	1	181,	0
chr1	844098	844279	ENSG00000228794.9	2.2e-06	+	844098	844279	0	1	181,	0
chr1	853778	854049	ENSG00000228794.9	2e-11	+	853778	854049	0	1	271,	0
chr1	854498	854679	ENSG00000228794.9	3.8e-05	+	854498	854679	0	1	181,	0
chr1	856207	856658	ENSG00000228794.9	4.7e-07	+	856207	856658	0	1	451,	0
chr1	856926	856987	ENSG00000228794.9	0.00026	+	856926	856987	0	1	61,	0
chr1	858695	858756	ENSG00000228794.9	0.0045	+	858695	858756	0	1	61,	0
chr1	911965	912383	ENSG00000230699.2	7.4e-10	+	911965	912383	0	1	418,	0
chr1	912442	914083	ENSG00000230699.2	1.6e-27	+	912442	914083	0	1	1641,	0
chr1	914440	914501	ENSG00000230699.2	0.00019	+	914440	914501	0	1	61,	0
chr1	914589	914650	ENSG00000230699.2	0.0012	+	914589	914650	0	1	61,	0
chr1	923927	925983	ENSG00000187634.12	7.9e-57	+	923927	925983	0	4	1021,40,70,62,	0,1222,1803,1994
chr1	942397	944581	ENSG00000187634.12	0	+	942397	944581	0	3	661,125,884,	0,855,1300
chr1	1014031	1014480	ENSG00000187608.10	2.5e-13	+	1014031	1014480	0	1	449,	0
chr1	1055008	1055818	ENSG00000188157.15	1e-196	+	1055008	1055818	0	1	810,	0
chr1	1055032	1056030	ENSG00000242590.1	1e-183	+	1055032	1056030	0	2	183,133,	0,865
chr1	1232296	1234236	ENSG00000176022.7	1e-77	+	1232296	1234236	0	1	1940,	0
chr1	1234354	1234981	ENSG00000176022.7	6.3e-58	+	1234354	1234981	0	1	627,	0
chr1	1279075	1279247	ENSG00000230415.1	6.6e-05	+	1279075	1279247	0	1	172,	0
chr1	1285595	1286065	ENSG00000162572.20	6.2e-05	+	1285595	1286065	0	2	69,140,	0,330
chr1	1311526	1311677	ENSG00000169972.12	1e-13	+	1311526	1311677	0	1	151,	0
chr1	1327351	1328896	ENSG00000224051.7	1.3e-48	+	1327351	1328896	0	1	1545,	0
chr1	1331919	1332065	ENSG00000169962.5	0.0028	+	1331919	1332065	0	2	19,42,	0,104
chr1	1332453	1332634	ENSG00000169962.5	7.6e-07	+	1332453	1332634	0	1	181,	0
chr1	1333076	1333906	ENSG00000169962.5	3.9e-08	+	1333076	1333906	0	3	48,121,401,	0,182,429
chr1	1399638	1399817	ENSG00000224870.7	0.00023	+	1399638	1399817	0	1	179,	0
chr1	1400203	1401957	ENSG00000224870.7	2.5e-90	+	1400203	1401957	0	1	1754,	0
chr1	1435010	1435567	ENSG00000179403.12	8.7e-06	+	1435010	1435567	0	2	136,45,	0,512
chr1	1437450	1440814	ENSG00000179403.12	1.6e-41	+	1437450	1440814	0	2	34,1734,	0,1630
chr1	1441353	1441504	ENSG00000179403.12	0.00081	+	1441353	1441504	0	1	151,	0
chr1	1512150	1512535	ENSG00000197785.13	7.2e-10	+	1512150	1512535	0	2	323,6,	0,379
chr1	1575444	1575502	ENSG00000215014.5	0.00043	+	1575444	1575502	0	1	58,	0
chr1	1601952	1602193	ENSG00000286989.1	4.7e-07	+	1601952	1602193	0	1	241,	0
chr1	1615474	1615899	ENSG00000197530.12	5.4e-07	+	1615474	1615899	0	2	159,21,	0,404
chr1	1623393	1623574	ENSG00000197530.12	7.4e-08	+	1623393	1623574	0	1	181,	0
chr1	1672704	1672884	ENSG00000269737.2	0.0001	+	1672704	1672884	0	1	180,	0
chr1	1737070	1737221	ENSG00000227775.3	0.0003	+	1737070	1737221	0	1	151,	0
chr1	2030130	2030400	ENSG00000187730.9	6.9e-05	+	2030130	2030400	0	1	270,	0
chr1	2184602	2185305	ENSG00000067606.17	7.9e-28	+	2184602	2185305	0	2	96,384,	0,319
chr1	2228438	2232587	ENSG00000157933.10	1e-162	+	2228438	2232587	0	2	1297,109,	0,4040
chr1	2306178	2306834	ENSG00000157933.10	1e-13	+	2306178	2306834	0	2	72,258,	0,398
chr1	2307012	2308060	ENSG00000157933.10	1e-120	+	2307012	2308060	0	1	1048,	0
chr1	2308149	2308419	ENSG00000157933.10	1e-100	+	2308149	2308419	0	1	270,	0
chr1	2403495	2403616	ENSG00000157916.20	0.0006	+	2403495	2403616	0	1	121,	0
chr1	2404872	2405442	ENSG00000157916.20	4e-12	+	2404872	2405442	0	1	570,	0
chr1	2546753	2546872	ENSG00000272449.2	2.8e-05	+	2546753	2546872	0	1	119,	0
chr1	2547106	2547283	ENSG00000272449.2	0.00063	+	2547106	2547283	0	1	177,	0
chr1	3411494	3412394	ENSG00000142611.17	2e-24	+	3411494	3412394	0	1	900,	0
chr1	3433977	3434247	ENSG00000142611.17	1.7e-07	+	3433977	3434247	0	1	270,	0
chr1	3434905	3435086	ENSG00000142611.17	5.5e-05	+	3434905	3435086	0	1	181,	0
chr1	3463337	3463637	ENSG00000130762.15	1.4e-05	+	3463337	3463637	0	1	300,	0
chr1	3628763	3628883	ENSG00000158109.15	2.5e-05	+	3628763	3628883	0	1	120,	0
chr1	3732937	3733896	ENSG00000078900.15	2e-32	+	3732937	3733896	0	1	959,	0
chr1	3735901	3735991	ENSG00000078900.15	0.00049	+	3735901	3735991	0	1	90,	0
chr1	3746459	3747910	ENSG00000162592.10	1.3e-87	+	3746459	3747910	0	2	232,97,	0,1354
chr1	3914289	3914483	ENSG00000236423.6	0.0017	+	3914289	3914483	0	2	1,89,	0,105
chr1	3916807	3916957	ENSG00000236423.6	0.0017	+	3916807	3916957	0	1	150,	0
chr1	6210613	6210734	ENSG00000158286.13	0.00083	+	6210613	6210734	0	1	121,	0
chr1	6238906	6239026	ENSG00000225077.3	0.0017	+	6238906	6239026	0	1	120,	0
chr1	6580606	6581145	ENSG00000204859.13	3.2e-40	+	6580606	6581145	0	1	539,	0
chr1	6588980	6589280	ENSG00000204859.13	5e-19	+	6588980	6589280	0	1	300,	0
chr1	6619950	6621441	ENSG00000116273.6	5e-12	+	6619950	6621441	0	2	387,31,	0,1460
chr1	6621499	6621976	ENSG00000116273.6	1.6e-48	+	6621499	6621976	0	1	477,	0
chr1	6632437	6633396	ENSG00000041988.15	1e-84	+	6632437	6633396	0	1	959,	0
chr1	6634448	6635167	ENSG00000041988.15	7.9e-19	+	6634448	6635167	0	1	719,	0
chr1	6635316	6635586	ENSG00000041988.15	1e-153	+	6635316	6635586	0	1	270,	0
chr1	7772764	7772944	ENSG00000049245.13	3.8e-05	+	7772764	7772944	0	1	180,	0
chr1	7781015	7781076	ENSG00000049245.13	0.00011	+	7781015	7781076	0	1	61,	0
chr1	8005043	8005252	ENSG00000284747.1	1.4e-05	+	8005043	8005252	0	1	209,	0
chr1	9244966	9245537	ENSG00000049239.12	4e-12	+	9244966	9245537	0	1	571,	0
chr1	9263574	9264325	ENSG00000049239.12	1e-10	+	9263574	9264325	0	1	751,	0
chr1	9266241	9266332	ENSG00000049239.12	0.00052	+	9266241	9266332	0	1	91,	0
chr1	9268969	9269419	ENSG00000049239.12	2.5e-26	+	9268969	9269419	0	1	450,	0
chr1	9269898	9269958	ENSG00000049239.12	0.00036	+	9269898	9269958	0	1	60,	0
chr1	9270737	9270798	ENSG00000049239.12	0.0019	+	9270737	9270798	0	1	61,	0
chr1	9355821	9356062	ENSG00000171621.14	1.4e-10	+	9355821	9356062	0	1	241,	0
chr1	9356121	9356211	ENSG00000171621.14	0.00062	+	9356121	9356211	0	1	90,	0
chr1	9356330	9367553	ENSG00000171621.14	3.2e-27	+	9356330	9367553	0	2	255,106,	0,11117
chr1	9367792	9368153	ENSG00000171621.14	1.3e-05	+	9367792	9368153	0	1	361,	0
chr1	9602230	9602411	ENSG00000188807.13	6.3e-15	+	9602230	9602411	0	1	181,	0
chr1	9613049	9613559	ENSG00000188807.13	5e-63	+	9613049	9613559	0	1	510,	0
chr1	9613798	9613978	ENSG00000188807.13	1.3e-05	+	9613798	9613978	0	1	180,	0
chr1	9726993	9727173	ENSG00000171608.15	0.0028	+	9726993	9727173	0	1	180,	0
chr1	9982597	9982777	ENSG00000173614.14	2e-06	+	9982597	9982777	0	1	180,	0
chr1	10033250	10033401	ENSG00000130939.19	1.5e-05	+	10033250	10033401	0	1	151,	0
chr1	10303474	10303655	ENSG00000054523.17	6.3e-16	+	10303474	10303655	0	1	181,	0
chr1	10304043	10304224	ENSG00000054523.17	2.1e-05	+	10304043	10304224	0	1	181,	0
chr1	10304313	10304794	ENSG00000054523.17	1.3e-16	+	10304313	10304794	0	1	481,	0
chr1	10378784	10378995	ENSG00000054523.17	0.00014	+	10378784	10378995	0	1	211,	0
chr1	10431143	10431354	ENSG00000251503.8	3.2e-13	+	10431143	10431354	0	1	211,	0
chr1	10431149	10431358	ENSG00000175279.22	2.5e-12	+	10431149	10431358	0	1	209,	0
chr1	10450164	10450313	ENSG00000241563.3	1.4e-05	+	10450164	10450313	0	1	149,	0
chr1	10629740	10630040	ENSG00000142655.13	6.3e-48	+	10629740	10630040	0	1	300,	0
chr1	10630458	10630519	ENSG00000142655.13	0.0034	+	10630458	10630519	0	1	61,	0
chr1	10639270	10639899	ENSG00000272078.1	3.2e-09	+	10639270	10639899	0	1	629,	0
chr1	10653824	10654004	ENSG00000272078.1	2.6e-10	+	10653824	10654004	0	1	180,	0
chr1	11023339	11023669	ENSG00000120948.17	1e-268	+	11023339	11023669	0	1	330,	0
chr1	11023728	11023998	ENSG00000120948.17	2.5e-79	+	11023728	11023998	0	1	270,	0
chr1	11273474	11273654	ENSG00000120942.13	1.8e-07	+	11273474	11273654	0	1	180,	0
chr1	11285834	11286074	ENSG00000120942.13	1.1e-08	+	11285834	11286074	0	1	240,	0
chr1	11295032	11295421	ENSG00000120942.13	6.5e-08	+	11295032	11295421	0	1	389,	0
chr1	11295689	11296049	ENSG00000120942.13	4.3e-10	+	11295689	11296049	0	1	360,	0
chr1	11655502	11655593	ENSG00000132879.14	0.0019	+	11655502	11655593	0	1	91,	0
chr1	11661175	11661235	ENSG00000132879.14	0.00031	+	11661175	11661235	0	1	60,	0
chr1	11661802	11662012	ENSG00000132879.14	2.2e-09	+	11661802	11662012	0	1	210,	0
chr1	11789314	11789375	ENSG00000215910.7	0.00079	+	11789314	11789375	0	1	61,	0
chr1	11974730	11975418	ENSG00000083444.17	1e-191	+	11974730	11975418	0	1	688,	0
chr1	12011626	12011927	ENSG00000116688.16	1.6e-89	+	12011626	12011927	0	1	301,	0
chr1	12012135	12012705	ENSG00000116688.16	1.3e-10	+	12012135	12012705	0	1	570,	0
chr1	12013094	12013155	ENSG00000116688.16	0.00056	+	12013094	12013155	0	1	61,	0
chr1	12021676	12022109	ENSG00000116691.11	4.3e-05	+	12021676	12022109	0	2	164,15,	0,418
chr1	12276306	12276607	ENSG00000048707.15	1.8e-09	+	12276306	12276607	0	1	301,	0
chr1	12276966	12277117	ENSG00000048707.15	9.5e-05	+	12276966	12277117	0	1	151,	0
chr1	12283038	12283129	ENSG00000048707.15	0.0011	+	12283038	12283129	0	1	91,	0
chr1	12508899	12509200	ENSG00000048707.15	7.9e-30	+	12508899	12509200	0	1	301,	0
chr1	13616133	13616224	ENSG00000162493.16	3e-05	+	13616133	13616224	0	1	91,	0
chr1	13779338	13779549	ENSG00000116731.22	6.5e-08	+	13779338	13779549	0	1	211,	0
chr1	13779637	13779788	ENSG00000116731.22	0.00014	+	13779637	13779788	0	1	151,	0
chr1	13779967	13780147	ENSG00000116731.22	3e-05	+	13779967	13780147	0	1	180,	0
chr1	13781882	13782032	ENSG00000116731.22	1.4e-08	+	13781882	13782032	0	1	150,	0
chr1	13782241	13782421	ENSG00000116731.22	2.3e-05	+	13782241	13782421	0	1	180,	0
chr1	13786762	13786852	ENSG00000116731.22	0.0016	+	13786762	13786852	0	1	90,	0
chr1	15215002	15215122	ENSG00000171729.14	1.1e-05	+	15215002	15215122	0	1	120,	0
chr1	15219403	15220329	ENSG00000171729.14	1e-27	+	15219403	15220329	0	1	926,	0
chr1	15568007	15568367	ENSG00000116138.13	3.2e-20	+	15568007	15568367	0	1	360,	0
chr1	15660015	15660076	ENSG00000197312.12	0.00076	+	15660015	15660076	0	1	61,	0
chr1	15660915	15661186	ENSG00000197312.12	4e-28	+	15660915	15661186	0	1	271,	0
chr1	15661575	15661816	ENSG00000197312.12	1e-13	+	15661575	15661816	0	1	241,	0
chr1	15662145	15662206	ENSG00000197312.12	0.0018	+	15662145	15662206	0	1	61,	0
chr1	15660914	15661184	ENSG00000215695.1	4e-28	+	15660914	15661184	0	1	270,	0
chr1	15661572	15661722	ENSG00000215695.1	7.2e-09	+	15661572	15661722	0	1	150,	0
chr1	15725383	15728147	ENSG00000116786.13	1e-288	+	15725383	15728147	0	3	162,819,69,	0,1630,2695
chr1	15734199	15734440	ENSG00000116786.13	6.3e-26	+	15734199	15734440	0	1	241,	0
chr1	15734558	15734709	ENSG00000116786.13	0.00058	+	15734558	15734709	0	1	151,	0
chr1	15784954	15785045	ENSG00000162458.13	0.0003	+	15784954	15785045	0	1	91,	0
chr1	15847796	15848006	ENSG00000065526.11	2.5e-17	+	15847796	15848006	0	1	210,	0
chr1	15872820	15876490	ENSG00000065526.11	1e-170	+	15872820	15876490	0	3	316,894,289,	0,681,3381
chr1	15928186	15929086	ENSG00000065526.11	1e-148	+	15928186	15929086	0	1	900,	0
chr1	15929324	15929535	ENSG00000065526.11	6.3e-33	+	15929324	15929535	0	1	211,	0
chr1	15930492	15930763	ENSG00000065526.11	1e-09	+	15930492	15930763	0	1	271,	0
chr1	15931780	15931841	ENSG00000065526.11	0.00087	+	15931780	15931841	0	1	61,	0
chr1	15932079	15932500	ENSG00000065526.11	7.9e-24	+	15932079	15932500	0	1	421,	0
chr1	15932738	15933009	ENSG00000065526.11	1e-27	+	15932738	15933009	0	1	271,	0
chr1	15933457	15934117	ENSG00000065526.11	3.2e-30	+	15933457	15934117	0	1	660,	0
chr1	15934565	15934775	ENSG00000065526.11	3.2e-15	+	15934565	15934775	0	1	210,	0
chr1	15935134	15935674	ENSG00000065526.11	5e-45	+	15935134	15935674	0	1	540,	0
chr1	15937407	15937618	ENSG00000065526.11	3.2e-19	+	15937407	15937618	0	1	211,	0
chr1	15939377	15940007	ENSG00000065526.11	1e-271	+	15939377	15940007	0	1	630,	0
chr1	16367172	16367784	ENSG00000055070.17	2.9e-10	+	16367172	16367784	0	2	136,74,	0,538
chr1	16395103	16395491	ENSG00000055070.17	5e-79	+	16395103	16395491	0	1	388,	0
chr1	16459059	16459300	ENSG00000157191.20	2e-18	+	16459059	16459300	0	1	241,	0
chr1	16459598	16459779	ENSG00000157191.20	1e-05	+	16459598	16459779	0	1	181,	0
chr1	16462078	16462347	ENSG00000226029.1	1e-10	+	16462078	16462347	0	1	269,	0
chr1	17697245	17697605	ENSG00000074964.17	2.6e-06	+	17697245	17697605	0	1	360,	0
chr1	19258731	19259088	ENSG00000053372.5	1e-249	+	19258731	19259088	0	1	357,	0
chr1	19260008	19260098	ENSG00000053372.5	0.0016	+	19260008	19260098	0	1	90,	0
chr1	19324661	19325544	ENSG00000040487.13	6.5e-06	+	19324661	19325544	0	2	101,50,	0,833
chr1	19327675	19327915	ENSG00000040487.13	5.2e-07	+	19327675	19327915	0	1	240,	0
chr1	19328063	19329300	ENSG00000040487.13	7.9e-98	+	19328063	19329300	0	2	18,729,	0,508
chr1	19484612	19596993	ENSG00000173436.15	2.2e-06	+	19484612	19596993	0	2	43,17,	0,112364
chr1	19657047	19657467	ENSG00000158747.14	1.3e-18	+	19657047	19657467	0	1	420,	0
chr1	19679260	19679740	ENSG00000158748.4	2e-07	+	19679260	19679740	0	1	480,	0
chr1	19906932	19907827	ENSG00000169914.6	2.5e-21	+	19906932	19907827	0	2	12,258,	0,637
chr1	20552930	20554930	ENSG00000183114.8	1e-109	+	20552930	20554930	0	1	2000,	0
chr1	20648548	20648937	ENSG00000158828.8	1.6e-30	+	20648548	20648937	0	1	389,	0
chr1	20650705	20651064	ENSG00000158828.8	5e-21	+	20650705	20651064	0	1	359,	0
chr1	21453982	21454043	ENSG00000142794.18	0.0011	+	21453982	21454043	0	1	61,	0
chr1	22030348	22030617	ENSG00000285959.1	3.2e-29	+	22030348	22030617	0	1	269,	0
chr1	22030356	22030745	ENSG00000218510.8	2.5e-42	+	22030356	22030745	0	1	389,	0
chr1	22030526	22030748	ENSG00000285794.1	6.3e-22	+	22030526	22030748	0	1	222,	0
chr1	22490249	22490370	ENSG00000184677.18	0.00011	+	22490249	22490370	0	1	121,	0
chr1	22524426	22526903	ENSG00000184677.18	4e-25	+	22524426	22526903	0	2	18,702,	0,1775
chr1	22527770	22528191	ENSG00000184677.18	1.6e-18	+	22527770	22528191	0	1	421,	0
chr1	22528849	22529419	ENSG00000184677.18	3.2e-25	+	22528849	22529419	0	1	570,	0
chr1	22530347	22530468	ENSG00000184677.18	0.00011	+	22530347	22530468	0	1	121,	0
chr1	22576746	22586525	ENSG00000070886.12	4.1e-05	+	22576746	22586525	0	2	134,46,	0,9733
chr1	22784443	22784804	ENSG00000133216.16	1e-14	+	22784443	22784804	0	1	361,	0
chr1	22864903	22865084	ENSG00000133216.16	2e-06	+	22864903	22865084	0	1	181,	0
chr1	22913655	22914524	ENSG00000133216.16	1.6e-16	+	22913655	22914524	0	1	869,	0
chr1	23751157	23752432	ENSG00000011007.12	4e-89	+	23751157	23752432	0	2	873,26,	0,1249
chr1	23757097	23759843	ENSG00000011007.12	1e-116	+	23757097	23759843	0	2	28,332,	0,2414
chr1	24745411	24745622	ENSG00000169504.15	6.3e-07	+	24745411	24745622	0	1	211,	0
chr1	25338346	25338529	ENSG00000183726.11	4.4e-07	+	25338346	25338529	0	2	110,70,	0,113
chr1	25458544	25458784	ENSG00000204178.11	7.8e-07	+	25458544	25458784	0	1	240,	0
chr1	25566906	25567747	ENSG00000157978.11	6.3e-90	+	25566906	25567747	0	1	841,	0
chr1	25617617	25617798	ENSG00000117643.14	0.00016	+	25617617	25617798	0	1	181,	0
chr1	25815711	25816130	ENSG00000162430.17	6.3e-43	+	25815711	25816130	0	1	419,	0
chr1	25859846	25863069	ENSG00000236528.1	2.5e-15	+	25859846	25863069	0	2	29,235,	0,2988
chr1	26122075	26122556	ENSG00000175087.10	1e-10	+	26122075	26122556	0	1	481,	0
chr1	26170112	26170464	ENSG00000142684.9	4.4e-05	+	26170112	26170464	0	2	71,47,	0,305
chr1	26170580	26170873	ENSG00000142684.9	0	+	26170580	26170873	0	1	293,	0
chr1	26255232	26255353	ENSG00000130695.15	3e-05	+	26255232	26255353	0	1	121,	0
chr1	26277162	26277343	ENSG00000130695.15	2.5e-05	+	26277162	26277343	0	1	181,	0
chr1	26467512	26469237	ENSG00000117682.17	2e-41	+	26467512	26469237	0	2	15,346,	0,1379
chr1	26469686	26469747	ENSG00000117682.17	0.00083	+	26469686	26469747	0	1	61,	0
chr1	26472439	26473256	ENSG00000198830.11	4e-31	+	26472439	26473256	0	2	188,51,	0,766
chr1	26574133	26574672	ENSG00000117676.14	7.9e-52	+	26574133	26574672	0	1	539,	0
chr1	26574850	26575000	ENSG00000117676.14	8.5e-07	+	26574850	26575000	0	1	150,	0
chr1	26693595	26727717	ENSG00000117713.20	1e-109	+	26693595	26727717	0	3	22,1526,10,	0,2419,34112
chr1	26731211	26731481	ENSG00000117713.20	1.1e-07	+	26731211	26731481	0	1	270,	0
chr1	26774583	26774883	ENSG00000117713.20	1.3e-11	+	26774583	26774883	0	1	300,	0
chr1	26779047	26780906	ENSG00000117713.20	1.00000000001329e-313	+	26779047	26780906	0	1	1859,	0
chr1	26787651	26787988	ENSG00000060642.10	0.00043	+	26787651	26787988	0	2	155,25,	0,312
chr1	26795052	26795113	ENSG00000060642.10	0.0022	+	26795052	26795113	0	1	61,	0
chr1	26797679	26797740	ENSG00000060642.10	0.001	+	26797679	26797740	0	1	61,	0
chr1	26853884	26854155	ENSG00000204160.12	5.2e-07	+	26853884	26854155	0	1	271,	0
chr1	26924153	26941654	ENSG00000090273.14	1.6e-19	+	26924153	26941654	0	2	13,198,	0,17303
chr1	27306605	27306696	ENSG00000142784.16	0.00011	+	27306605	27306696	0	1	91,	0
chr1	27335474	27335744	ENSG00000186501.14	1e-35	+	27335474	27335744	0	1	270,	0
chr1	27350458	27350519	ENSG00000142765.18	0.0045	+	27350458	27350519	0	1	61,	0
chr1	27351264	27351474	ENSG00000142765.18	0.00016	+	27351264	27351474	0	2	72,19,	0,191
chr1	27847088	27850449	ENSG00000117751.18	6.3e-38	+	27847088	27850449	0	2	4,357,	0,3004
chr1	27882368	27882906	ENSG00000130775.16	7.9e-15	+	27882368	27882906	0	1	538,	0
chr1	27885969	27886148	ENSG00000130775.16	2.8e-07	+	27885969	27886148	0	1	179,	0
chr1	27966724	27966993	ENSG00000158156.7	1.1e-08	+	27966724	27966993	0	1	269,	0
chr1	27967171	27967440	ENSG00000158156.7	5e-12	+	27967171	27967440	0	1	269,	0
chr1	28236108	28236377	ENSG00000130770.18	1.3e-18	+	28236108	28236377	0	2	162,17,	0,252
chr1	28280789	28281268	ENSG00000130766.5	1e-104	+	28280789	28281268	0	1	479,	0
chr1	28282132	28282193	ENSG00000130766.5	0.00043	+	28282132	28282193	0	1	61,	0
chr1	28334482	28335016	ENSG00000130772.14	2e-63	+	28334482	28335016	0	1	534,	0
chr1	28369761	28432933	ENSG00000204138.13	0.0014	+	28369761	28432933	0	3	64,54,3,	0,37648,63169
chr1	28466468	28466769	ENSG00000204138.13	1e-44	+	28466468	28466769	0	1	301,	0
chr1	28473710	28474011	ENSG00000204138.13	6.3e-22	+	28473710	28474011	0	1	301,	0
chr1	28538163	28538313	ENSG00000180198.16	1.9e-08	+	28538163	28538313	0	1	150,	0
chr1	28538492	28538911	ENSG00000180198.16	3.2e-25	+	28538492	28538911	0	1	419,	0
chr1	28714210	28714928	ENSG00000162419.12	1e-78	+	28714210	28714928	0	1	718,	0
chr1	28715047	28715377	ENSG00000162419.12	2e-19	+	28715047	28715377	0	1	330,	0
chr1	28736799	28737049	ENSG00000198492.16	5e-07	+	28736799	28737049	0	2	10,110,	0,140
chr1	28742625	28743908	ENSG00000198492.16	9.88131291682493e-324	+	28742625	28743908	0	1	1283,	0
chr1	28768999	28769238	ENSG00000198492.16	1e-34	+	28768999	28769238	0	1	239,	0
chr1	28859143	28859264	ENSG00000116329.11	0.0011	+	28859143	28859264	0	1	121,	0
chr1	28862880	28863930	ENSG00000116329.11	1.3e-14	+	28862880	28863930	0	1	1050,	0
chr1	28864857	28865008	ENSG00000116329.11	0.0011	+	28864857	28865008	0	1	151,	0
chr1	28870607	28870818	ENSG00000116329.11	2.2e-06	+	28870607	28870818	0	1	211,	0
chr1	28887090	28893431	ENSG00000159023.21	3.7e-07	+	28887090	28893431	0	2	120,61,	0,6280
chr1	28987452	28987783	ENSG00000159023.21	1e-218	+	28987452	28987783	0	1	331,	0
chr1	29119595	29119746	ENSG00000159023.21	0.00013	+	29119595	29119746	0	1	151,	0
chr1	29280124	29282719	ENSG00000060656.20	0.0036	+	29280124	29282719	0	2	17,44,	0,2551
chr1	30718950	30719130	ENSG00000186056.10	9.1e-06	+	30718950	30719130	0	1	180,	0
chr1	30719188	30719279	ENSG00000186056.10	0.0037	+	30719188	30719279	0	1	91,	0
chr1	30721626	30725802	ENSG00000186056.10	0.003	+	30721626	30725802	0	2	97,83,	0,4093
chr1	31364125	31364333	ENSG00000121766.15	4e-21	+	31364125	31364333	0	1	208,	0
chr1	31364568	31364658	ENSG00000121766.15	0.00045	+	31364568	31364658	0	1	90,	0
chr1	32169927	32170018	ENSG00000025800.14	5.1e-05	+	32169927	32170018	0	1	91,	0
chr1	32170813	32171233	ENSG00000025800.14	9.99999999999948e-312	+	32170813	32171233	0	1	420,	0
chr1	32176113	32176264	ENSG00000025800.14	2.3e-08	+	32176113	32176264	0	1	151,	0
chr1	32170790	32176394	ENSG00000250135.1	9.99999999999948e-312	+	32170790	32176394	0	2	416,19,	0,5585
chr1	32179674	32180142	ENSG00000084652.16	0.00012	+	32179674	32180142	0	2	102,78,	0,390
chr1	32181257	32181497	ENSG00000084652.16	1.3e-19	+	32181257	32181497	0	1	240,	0
chr1	32194134	32195385	ENSG00000084652.16	1e-176	+	32194134	32195385	0	2	26,484,	0,767
chr1	32200655	32201762	ENSG00000160050.14	0.0013	+	32200655	32201762	0	2	54,67,	0,1040
chr1	32207403	32208329	ENSG00000160051.11	1e-33	+	32207403	32208329	0	1	926,	0
chr1	32292082	32292202	ENSG00000116478.12	7.8e-08	+	32292082	32292202	0	1	120,	0
chr1	32362550	32362670	ENSG00000162526.7	0.00062	+	32362550	32362670	0	1	120,	0
chr1	32363655	32363775	ENSG00000162526.7	0.00012	+	32363655	32363775	0	1	120,	0
chr1	32465086	32470835	ENSG00000254553.1	1e-12	+	32465086	32470835	0	2	19,252,	0,5497
chr1	32471073	32471464	ENSG00000254553.1	1e-18	+	32471073	32471464	0	1	391,	0
chr1	32485218	32536488	ENSG00000254553.1	5e-11	+	32485218	32536488	0	3	114,93,4,	0,50894,51266
chr1	32600132	32600283	ENSG00000254553.1	2e-07	+	32600132	32600283	0	1	151,	0
chr1	32465101	32470850	ENSG00000273274.2	6.3e-13	+	32465101	32470850	0	2	4,267,	0,5482
chr1	32471089	32471449	ENSG00000273274.2	2.5e-18	+	32471089	32471449	0	1	360,	0
chr1	32485234	32485475	ENSG00000273274.2	2.5e-15	+	32485234	32485475	0	1	241,	0
chr1	32600123	32600274	ENSG00000160062.15	4.8e-07	+	32600123	32600274	0	1	151,	0
chr1	32769934	32770295	ENSG00000162522.11	4.9e-09	+	32769934	32770295	0	1	361,	0
chr1	32771731	32771822	ENSG00000162522.11	0.0021	+	32771731	32771822	0	1	91,	0
chr1	32772031	32773293	ENSG00000162522.11	6.3e-77	+	32772031	32773293	0	2	410,429,	0,833
chr1	32773621	32773742	ENSG00000162522.11	0.00021	+	32773621	32773742	0	1	121,	0
chr1	32826418	32826838	ENSG00000116497.18	2e-29	+	32826418	32826838	0	1	420,	0
chr1	33299012	33299941	ENSG00000160094.15	1e-134	+	33299012	33299941	0	1	929,	0
chr1	33479191	33488521	ENSG00000121903.14	2e-13	+	33479191	33488521	0	2	514,57,	0,9273
chr1	33491096	33491697	ENSG00000121903.14	6.3e-13	+	33491096	33491697	0	1	601,	0
chr1	33493295	33493596	ENSG00000121903.14	3.2e-19	+	33493295	33493596	0	1	301,	0
chr1	33494317	33494498	ENSG00000121903.14	1e-07	+	33494317	33494498	0	1	181,	0
chr1	33494887	33495038	ENSG00000121903.14	7.9e-08	+	33494887	33495038	0	1	151,	0
chr1	33495367	33495488	ENSG00000121903.14	8.1e-05	+	33495367	33495488	0	1	121,	0
chr1	35113705	35114005	ENSG00000197056.11	4e-11	+	35113705	35114005	0	1	300,	0
chr1	35114841	35114932	ENSG00000197056.11	0.0019	+	35114841	35114932	0	1	91,	0
chr1	35114991	35115321	ENSG00000197056.11	6.3e-16	+	35114991	35115321	0	1	330,	0
chr1	35359117	35359328	ENSG00000146463.11	9.8e-07	+	35359117	35359328	0	1	211,	0
chr1	35381590	35381741	ENSG00000146463.11	6.9e-06	+	35381590	35381741	0	1	151,	0
chr1	35419538	35419839	ENSG00000146463.11	3.2e-14	+	35419538	35419839	0	1	301,	0
chr1	35557742	35557983	ENSG00000020129.16	2.5e-14	+	35557742	35557983	0	1	241,	0
chr1	35558251	35558462	ENSG00000020129.16	1.1e-07	+	35558251	35558462	0	1	211,	0
chr1	35559233	35561241	ENSG00000020129.16	1e-102	+	35559233	35561241	0	2	14,916,	0,1092
chr1	35855824	35855945	ENSG00000134698.11	8.1e-05	+	35855824	35855945	0	1	121,	0
chr1	35919792	35920003	ENSG00000092847.12	3.2e-11	+	35919792	35920003	0	1	211,	0
chr1	36093106	36093372	ENSG00000116863.11	7.9e-33	+	36093106	36093372	0	1	266,	0
chr1	36093460	36093785	ENSG00000116863.11	3.2e-38	+	36093460	36093785	0	1	325,	0
chr1	36156168	36156349	ENSG00000116871.15	1.6e-05	+	36156168	36156349	0	1	181,	0
chr1	36178108	36178438	ENSG00000116871.15	1.7e-05	+	36178108	36178438	0	2	93,28,	0,302
chr1	36178497	36178947	ENSG00000116871.15	7.9e-25	+	36178497	36178947	0	1	450,	0
chr1	36286585	36286825	ENSG00000054118.15	1e-12	+	36286585	36286825	0	1	240,	0
chr1	36289210	36289450	ENSG00000054118.15	1e-41	+	36289210	36289450	0	1	240,	0
chr1	36303833	36304371	ENSG00000054118.15	1e-293	+	36303833	36304371	0	1	538,	0
chr1	36319781	36319932	ENSG00000214193.10	0.00026	+	36319781	36319932	0	1	151,	0
chr1	36320587	36321317	ENSG00000214193.10	2.6e-10	+	36320587	36321317	0	3	211,64,262,	0,327,468
chr1	36321764	36323902	ENSG00000214193.10	1e-22	+	36321764	36323902	0	3	14,301,133,	0,599,2005
chr1	37708323	37708472	ENSG00000134690.11	1.2e-10	+	37708323	37708472	0	1	149,	0
chr1	37799702	37800569	ENSG00000185090.14	3.2e-84	+	37799702	37800569	0	1	867,	0
chr1	37808108	37808525	ENSG00000197982.14	1.6e-18	+	37808108	37808525	0	1	417,	0
chr1	37809037	37809127	ENSG00000197982.14	1.1e-05	+	37809037	37809127	0	1	90,	0
chr1	39387405	39387586	ENSG00000127603.26	3.4e-05	+	39387405	39387586	0	1	181,	0
chr1	39388065	39388126	ENSG00000127603.26	0.00011	+	39388065	39388126	0	1	61,	0
chr1	39388365	39409570	ENSG00000127603.26	5e-27	+	39388365	39409570	0	2	293,68,	0,21137
chr1	39409689	39409990	ENSG00000127603.26	1.3e-08	+	39409689	39409990	0	1	301,	0
chr1	39410079	39410440	ENSG00000127603.26	3.2e-44	+	39410079	39410440	0	1	361,	0
chr1	39411159	39411760	ENSG00000127603.26	5e-38	+	39411159	39411760	0	1	601,	0
chr1	39411999	39412300	ENSG00000127603.26	7.9e-11	+	39411999	39412300	0	1	301,	0
chr1	39412509	39412900	ENSG00000127603.26	3.2e-24	+	39412509	39412900	0	1	391,	0
chr1	39413319	39413380	ENSG00000127603.26	0.0001	+	39413319	39413380	0	1	61,	0
chr1	39414249	39414340	ENSG00000127603.26	0.00031	+	39414249	39414340	0	1	91,	0
chr1	39527110	39527201	ENSG00000183682.8	0.00043	+	39527110	39527201	0	1	91,	0
chr1	40236037	40236218	ENSG00000117000.9	2.2e-05	+	40236037	40236218	0	1	181,	0
chr1	40239063	40239243	ENSG00000117000.9	2.5e-11	+	40239063	40239243	0	1	180,	0
chr1	40240171	40240532	ENSG00000117000.9	1.6e-24	+	40240171	40240532	0	1	361,	0
chr1	40462971	40463241	ENSG00000187801.15	6.3e-15	+	40462971	40463241	0	1	270,	0
chr1	40514772	40514981	ENSG00000164002.11	2.7e-08	+	40514772	40514981	0	1	209,	0
chr1	40770793	40770974	ENSG00000066136.20	7.8e-06	+	40770793	40770974	0	1	181,	0
chr1	40838352	40838593	ENSG00000117013.17	2.8e-05	+	40838352	40838593	0	1	241,	0
chr1	41361921	41383081	ENSG00000204060.7	1.3e-50	+	41361921	41383081	0	2	423,1466,	0,19694
chr1	42682417	42682626	ENSG00000065978.19	1.3e-69	+	42682417	42682626	0	1	209,	0
chr1	42775220	42775520	ENSG00000164008.16	3.2e-23	+	42775220	42775520	0	1	300,	0
chr1	42775236	42775505	ENSG00000283580.3	1.6e-22	+	42775236	42775505	0	1	269,	0
chr1	42830150	42830959	ENSG00000164010.15	1.3e-39	+	42830150	42830959	0	1	809,	0
chr1	42850950	42851250	ENSG00000164011.18	5e-26	+	42850950	42851250	0	1	300,	0
chr1	42851488	42852028	ENSG00000164011.18	4e-74	+	42851488	42852028	0	1	540,	0
chr1	42974045	42974196	ENSG00000227533.6	0.00026	+	42974045	42974196	0	1	151,	0
chr1	43410007	43410098	ENSG00000198198.16	0.00043	+	43410007	43410098	0	1	91,	0
chr1	43410306	43410397	ENSG00000198198.16	0.0045	+	43410306	43410397	0	1	91,	0
chr1	43449104	43449195	ENSG00000198198.16	0.00043	+	43449104	43449195	0	1	91,	0
chr1	43450408	43451219	ENSG00000198198.16	1e-28	+	43450408	43451219	0	1	811,	0
chr1	43451488	43451699	ENSG00000198198.16	1.7e-10	+	43451488	43451699	0	1	211,	0
chr1	43453287	43453348	ENSG00000198198.16	0.00014	+	43453287	43453348	0	1	61,	0
chr1	43528729	43545038	ENSG00000142949.17	3.2e-15	+	43528729	43545038	0	4	27,215,80,8,	0,2146,9468,16301
chr1	43588957	43591528	ENSG00000142949.17	2.5e-94	+	43588957	43591528	0	2	43,557,	0,2014
chr1	43603519	43604106	ENSG00000142949.17	1e-107	+	43603519	43604106	0	2	14,496,	0,91
chr1	43622199	43622260	ENSG00000142949.17	0.00025	+	43622199	43622260	0	1	61,	0
chr1	43704498	43704799	ENSG00000066135.13	6.3e-84	+	43704498	43704799	0	1	301,	0
chr1	43930864	43931014	ENSG00000284989.1	1e-13	+	43930864	43931014	0	1	150,	0
chr1	43912785	43912846	ENSG00000126091.20	0.0028	+	43912785	43912846	0	1	61,	0
chr1	43913744	43913805	ENSG00000126091.20	0.00068	+	43913744	43913805	0	1	61,	0
chr1	43914163	43914224	ENSG00000126091.20	0.0017	+	43914163	43914224	0	1	61,	0
chr1	43930864	43931105	ENSG00000126091.20	4e-19	+	43930864	43931105	0	1	241,	0
chr1	43936732	43936822	ENSG00000117407.17	0.0013	+	43936732	43936822	0	1	90,	0
chr1	43936941	43937121	ENSG00000117407.17	4.6e-05	+	43936941	43937121	0	1	180,	0
chr1	43946949	43953281	ENSG00000117408.11	1e-153	+	43946949	43953281	0	3	735,782,65,	0,2422,6267
chr1	43972272	43972682	ENSG00000132768.14	4e-28	+	43972272	43972682	0	2	62,268,	0,142
chr1	43979449	43979510	ENSG00000117411.16	0.0032	+	43979449	43979510	0	1	61,	0
chr1	43985911	43986121	ENSG00000117411.16	9.3e-07	+	43985911	43986121	0	1	210,	0
chr1	43986180	43990721	ENSG00000117411.16	0	+	43986180	43990721	0	2	26,424,	0,4117
chr1	43990900	43991080	ENSG00000117411.16	7.9e-22	+	43990900	43991080	0	1	180,	0
chr1	44412442	44412652	ENSG00000187147.18	1.6e-13	+	44412442	44412652	0	1	210,	0
chr1	45326993	45327349	ENSG00000186603.5	1.5e-10	+	45326993	45327349	0	1	356,	0
chr1	45327555	45327763	ENSG00000186603.5	2.3e-05	+	45327555	45327763	0	1	208,	0
chr1	45327822	45327911	ENSG00000186603.5	0.0011	+	45327822	45327911	0	1	89,	0
chr1	45343107	45343525	ENSG00000132773.12	2e-25	+	45343107	45343525	0	1	418,	0
chr1	45508930	45509230	ENSG00000132763.15	1.5e-07	+	45508930	45509230	0	1	300,	0
chr1	45510424	45510574	ENSG00000132763.15	5.2e-07	+	45510424	45510574	0	1	150,	0
chr1	45607355	45607566	ENSG00000132780.17	6.3e-26	+	45607355	45607566	0	1	211,	0
chr1	45607685	45607836	ENSG00000132780.17	1.3e-13	+	45607685	45607836	0	1	151,	0
chr1	45608014	45608225	ENSG00000132780.17	5e-53	+	45608014	45608225	0	1	211,	0
chr1	45618693	45618784	ENSG00000132780.17	2.9e-05	+	45618693	45618784	0	1	91,	0
chr1	46034684	46035403	ENSG00000086015.21	1e-29	+	46034684	46035403	0	1	719,	0
chr1	46035462	46036062	ENSG00000086015.21	7.9e-19	+	46035462	46036062	0	1	600,	0
chr1	46219705	46220153	ENSG00000171357.6	5e-43	+	46219705	46220153	0	1	448,	0
chr1	46220897	46220958	ENSG00000171357.6	0.0054	+	46220897	46220958	0	1	61,	0
chr1	46341999	46342060	ENSG00000117481.10	0.0013	+	46341999	46342060	0	1	61,	0
chr1	46361651	46361831	ENSG00000117481.10	2.1e-07	+	46361651	46361831	0	1	180,	0
chr1	46512404	46512555	ENSG00000197587.10	4.1e-06	+	46512404	46512555	0	1	151,	0
chr1	47436585	47436766	ENSG00000186564.5	1.5e-08	+	47436585	47436766	0	1	181,	0
chr1	47436855	47437066	ENSG00000186564.5	4e-14	+	47436855	47437066	0	1	211,	0
chr1	47437993	47439852	ENSG00000186564.5	1.3e-53	+	47437993	47439852	0	1	1859,	0
chr1	50960774	50968086	ENSG00000123080.12	1.1e-05	+	50960774	50968086	0	2	29,151,	0,7161
chr1	50968772	50974276	ENSG00000123080.12	1e-94	+	50968772	50974276	0	3	1127,253,384,	0,1472,5120
chr1	52033478	52033537	ENSG00000223390.1	0.0024	+	52033478	52033537	0	1	59,	0
chr1	52238252	52238433	ENSG00000157077.14	8.9e-06	+	52238252	52238433	0	1	181,	0
chr1	52238552	52238852	ENSG00000157077.14	2.5e-12	+	52238552	52238852	0	1	300,	0
chr1	52417788	52418028	ENSG00000134748.13	2e-23	+	52417788	52418028	0	1	240,	0
chr1	52771161	52771312	ENSG00000162378.13	6.6e-10	+	52771161	52771312	0	1	151,	0
chr1	52771460	52771641	ENSG00000162378.13	3.2e-06	+	52771460	52771641	0	1	181,	0
chr1	52857444	52860785	ENSG00000203995.9	5e-31	+	52857444	52860785	0	2	305,55,	0,3286
chr1	52893084	52893324	ENSG00000203995.9	2.5e-63	+	52893084	52893324	0	1	240,	0
chr1	52994902	52994992	ENSG00000226147.1	0.0045	+	52994902	52994992	0	1	90,	0
chr1	53210119	53210270	ENSG00000157184.7	5.9e-07	+	53210119	53210270	0	1	151,	0
chr1	53210478	53210689	ENSG00000157184.7	4.9e-09	+	53210478	53210689	0	1	211,	0
chr1	54096371	54096672	ENSG00000116205.14	2.5e-20	+	54096371	54096672	0	1	301,	0
chr1	54225163	54225374	ENSG00000116221.15	1.3e-07	+	54225163	54225374	0	1	211,	0
chr1	54609471	54609532	ENSG00000162390.17	0.0046	+	54609471	54609532	0	1	61,	0
chr1	54609621	54609832	ENSG00000162390.17	0.00052	+	54609621	54609832	0	1	211,	0
chr1	54741529	54742308	ENSG00000271723.5	0	+	54741529	54742308	0	1	779,	0
chr1	54741523	54742329	ENSG00000243725.7	0	+	54741523	54742329	0	1	806,	0
chr1	54742388	54742448	ENSG00000243725.7	0.00023	+	54742388	54742448	0	1	60,	0
chr1	56704208	56704268	ENSG00000162409.11	0.00021	+	56704208	56704268	0	1	60,	0
chr1	61088330	61088631	ENSG00000162599.17	6.3e-52	+	61088330	61088631	0	1	301,	0
chr1	62444871	62445142	ENSG00000162607.13	1e-158	+	62444871	62445142	0	1	271,	0
chr1	62450574	62450635	ENSG00000162607.13	0.00015	+	62450574	62450635	0	1	61,	0
chr1	62816685	62819062	ENSG00000125703.15	6.6e-09	+	62816685	62819062	0	2	123,58,	0,2319
chr1	63323070	63324054	ENSG00000187140.5	1.6e-28	+	63323070	63324054	0	1	984,	0
chr1	63324172	63324709	ENSG00000187140.5	5.2e-07	+	63324172	63324709	0	1	537,	0
chr1	63593470	63593561	ENSG00000079739.17	5.9e-05	+	63593470	63593561	0	1	91,	0
chr1	63593964	63594144	ENSG00000079739.17	0.00052	+	63593964	63594144	0	1	180,	0
chr1	63774106	63774197	ENSG00000185483.12	2.1e-05	+	63774106	63774197	0	1	91,	0
chr1	64177538	64177809	ENSG00000185483.12	0.00021	+	64177538	64177809	0	1	271,	0
chr1	64178108	64178168	ENSG00000185483.12	0.00063	+	64178108	64178168	0	1	60,	0
chr1	64178677	64179248	ENSG00000185483.12	1e-52	+	64178677	64179248	0	1	571,	0
chr1	64691414	64691654	ENSG00000158966.15	4.2e-07	+	64691414	64691654	0	1	240,	0
chr1	64691713	64691893	ENSG00000158966.15	0.0018	+	64691713	64691893	0	1	180,	0
chr1	64692041	64692251	ENSG00000158966.15	1.3e-11	+	64692041	64692251	0	1	210,	0
chr1	64777796	64778036	ENSG00000162437.14	5e-34	+	64777796	64778036	0	1	240,	0
chr1	64832932	64833083	ENSG00000162437.14	2.3e-05	+	64832932	64833083	0	1	151,	0
chr1	66372421	66372661	ENSG00000184588.18	2.2e-05	+	66372421	66372661	0	1	240,	0
chr1	66984602	66984903	ENSG00000198160.14	1.6e-77	+	66984602	66984903	0	1	301,	0
chr1	67685259	67685379	ENSG00000116717.13	0.00021	+	67685259	67685379	0	1	120,	0
chr1	67687741	67688038	ENSG00000116717.13	6.3e-41	+	67687741	67688038	0	1	297,	0
chr1	70250686	70250837	ENSG00000116754.13	3.7e-10	+	70250686	70250837	0	1	151,	0
chr1	75754984	75755075	ENSG00000117054.13	0.0011	+	75754984	75755075	0	1	91,	0
chr1	76055839	76055959	ENSG00000230027.2	0.00043	+	76055839	76055959	0	1	120,	0
chr1	76868885	76868976	ENSG00000117069.15	8.7e-05	+	76868885	76868976	0	1	91,	0
chr1	77888632	77888693	ENSG00000162614.18	0.003	+	77888632	77888693	0	1	61,	0
chr1	78013390	78013540	ENSG00000162616.9	8.9e-06	+	78013390	78013540	0	1	150,	0
chr1	81943185	81943575	ENSG00000117114.19	1.6e-14	+	81943185	81943575	0	1	390,	0
chr1	81990399	81990999	ENSG00000117114.19	1.6e-27	+	81990399	81990999	0	1	600,	0
chr1	81991208	81991269	ENSG00000117114.19	0.001	+	81991208	81991269	0	1	61,	0
chr1	84078181	84078361	ENSG00000142875.19	4.5e-05	+	84078181	84078361	0	1	180,	0
chr1	85580760	85580940	ENSG00000142871.17	6.3e-09	+	85580760	85580940	0	1	180,	0
chr1	85582996	85583325	ENSG00000142871.17	2e-17	+	85582996	85583325	0	1	329,	0
chr1	86914634	86914875	ENSG00000153936.17	3.2e-12	+	86914634	86914875	0	1	241,	0
chr1	87328879	87331251	ENSG00000143013.13	2.5e-39	+	87328879	87331251	0	2	365,25,	0,2347
chr1	87344909	87345180	ENSG00000143013.13	7.9e-88	+	87344909	87345180	0	1	271,	0
chr1	88833346	88833587	ENSG00000065243.20	5e-23	+	88833346	88833587	0	1	241,	0
chr1	89582719	89582900	ENSG00000197147.13	2e-05	+	89582719	89582900	0	1	181,	0
chr1	89583798	89583979	ENSG00000197147.13	1.8e-05	+	89583798	89583979	0	1	181,	0
chr1	89584158	89584368	ENSG00000197147.13	6.3e-07	+	89584158	89584368	0	1	210,	0
chr1	89592858	89593099	ENSG00000197147.13	2.5e-17	+	89592858	89593099	0	1	241,	0
chr1	89713294	89713595	ENSG00000171488.15	6.3e-10	+	89713294	89713595	0	1	301,	0
chr1	89713744	89713925	ENSG00000171488.15	1.3e-06	+	89713744	89713925	0	1	181,	0
chr1	89714524	89714734	ENSG00000171488.15	7.8e-05	+	89714524	89714734	0	1	210,	0
chr1	89714793	89715004	ENSG00000171488.15	0.00016	+	89714793	89715004	0	1	211,	0
chr1	89821223	89821283	ENSG00000171492.14	0.00066	+	89821223	89821283	0	1	60,	0
chr1	89934664	89935084	ENSG00000171492.14	5.8e-10	+	89934664	89935084	0	1	420,	0
chr1	89935292	89935653	ENSG00000171492.14	1e-18	+	89935292	89935653	0	1	361,	0
chr1	91524114	91524295	ENSG00000097046.13	1.6e-06	+	91524114	91524295	0	1	181,	0
chr1	92030104	92030285	ENSG00000172031.7	0.00054	+	92030104	92030285	0	1	181,	0
chr1	92177014	92177105	ENSG00000189195.13	0.0017	+	92177014	92177105	0	1	91,	0
chr1	92388513	92388724	ENSG00000122484.9	4.3e-05	+	92388513	92388724	0	1	211,	0
chr1	92389083	92389173	ENSG00000122484.9	0.00052	+	92389083	92389173	0	1	90,	0
chr1	92393277	92393458	ENSG00000122484.9	0.00016	+	92393277	92393458	0	1	181,	0
chr1	92395793	92395914	ENSG00000122484.9	0.0013	+	92395793	92395914	0	1	121,	0
chr1	93136710	93137100	ENSG00000143033.18	1.3e-19	+	93136710	93137100	0	1	390,	0
chr1	93180367	93183385	ENSG00000122483.17	1.3e-08	+	93180367	93183385	0	2	515,26,	0,2992
chr1	93346056	93346266	ENSG00000117505.13	2.1e-10	+	93346056	93346266	0	1	210,	0
chr1	93346325	93346835	ENSG00000117505.13	2.5e-44	+	93346325	93346835	0	1	510,	0
chr1	95244414	95244683	ENSG00000271092.5	4e-29	+	95244414	95244683	0	1	269,	0
chr1	95244421	95244689	ENSG00000122481.17	3.2e-29	+	95244421	95244689	0	1	268,	0
chr1	99969470	99969531	ENSG00000117620.15	0.0028	+	99969470	99969531	0	1	61,	0
chr1	101239169	101239230	ENSG00000170989.9	0.0017	+	101239169	101239230	0	1	61,	0
chr1	101240005	101240394	ENSG00000170989.9	5.4e-05	+	101240005	101240394	0	1	389,	0
chr1	103526110	103526261	ENSG00000185946.16	0.00051	+	103526110	103526261	0	1	151,	0
chr1	107056678	107058024	ENSG00000198890.8	1e-151	+	107056678	107058024	0	1	1346,	0
chr1	108699840	108700050	ENSG00000134186.12	5e-07	+	108699840	108700050	0	1	210,	0
chr1	108929785	108929936	ENSG00000121957.14	6.8e-08	+	108929785	108929936	0	1	151,	0
chr1	109090310	109090371	ENSG00000215717.6	0.0012	+	109090310	109090371	0	1	61,	0
chr1	109094602	109094782	ENSG00000215717.6	3.3e-07	+	109094602	109094782	0	1	180,	0
chr1	109214633	109215082	ENSG00000031698.13	1e-116	+	109214633	109215082	0	1	449,	0
chr1	109237823	109238182	ENSG00000031698.13	5e-42	+	109237823	109238182	0	1	359,	0
chr1	109249538	109249869	ENSG00000143126.8	1.3e-08	+	109249538	109249869	0	1	331,	0
chr1	109250048	109250378	ENSG00000143126.8	1.8e-05	+	109250048	109250378	0	1	330,	0
chr1	109250587	109253316	ENSG00000143126.8	4e-24	+	109250587	109253316	0	1	2729,	0
chr1	109258597	109258747	ENSG00000143126.8	6.6e-10	+	109258597	109258747	0	1	150,	0
chr1	109274341	109274912	ENSG00000143126.8	1e-82	+	109274341	109274912	0	1	571,	0
chr1	109483568	109483628	ENSG00000162650.16	0.0045	+	109483568	109483628	0	1	60,	0
chr1	109483837	109483897	ENSG00000162650.16	8.7e-05	+	109483837	109483897	0	1	60,	0
chr1	109491306	109491635	ENSG00000162650.16	2.5e-42	+	109491306	109491635	0	1	329,	0
chr1	109592381	109592622	ENSG00000065135.11	4e-16	+	109592381	109592622	0	1	241,	0
chr1	109923230	109923739	ENSG00000184371.14	1e-09	+	109923230	109923739	0	1	509,	0
chr1	109923858	109925151	ENSG00000184371.14	3.5e-05	+	109923858	109925151	0	3	332,53,5,	0,917,1288
chr1	109928866	109930094	ENSG00000184371.14	1.3e-48	+	109928866	109930094	0	1	1228,	0
chr1	110053690	110053990	ENSG00000143093.15	5e-78	+	110053690	110053990	0	1	300,	0
chr1	110112556	110112616	ENSG00000186150.4	0.0071	+	110112556	110112616	0	1	60,	0
chr1	110211342	110219721	ENSG00000116396.14	6.3e-40	+	110211342	110219721	0	2	835,6,	0,8373
chr1	110223049	110223379	ENSG00000116396.14	5e-28	+	110223049	110223379	0	1	330,	0
chr1	110223438	110224039	ENSG00000116396.14	6.3e-68	+	110223438	110224039	0	1	601,	0
chr1	110232970	110233151	ENSG00000116396.14	3.4e-08	+	110232970	110233151	0	1	181,	0
chr1	110338685	110338865	ENSG00000162775.16	2.8e-08	+	110338685	110338865	0	1	180,	0
chr1	110339523	110342277	ENSG00000162775.16	1e-205	+	110339523	110342277	0	1	2754,	0
chr1	110347295	110347506	ENSG00000224699.9	4.3e-07	+	110347295	110347506	0	1	211,	0
chr1	110347625	110347746	ENSG00000224699.9	1.7e-05	+	110347625	110347746	0	1	121,	0
chr1	110407553	110407764	ENSG00000224699.9	4e-14	+	110407553	110407764	0	1	211,	0
chr1	111619843	111627557	ENSG00000116473.14	0.00037	+	111619843	111627557	0	2	91,89,	0,7625
chr1	111765968	111766388	ENSG00000064703.12	4e-30	+	111765968	111766388	0	1	420,	0
chr1	111766566	111767104	ENSG00000064703.12	7.9e-19	+	111766566	111767104	0	1	538,	0
chr1	112456073	112456733	ENSG00000143079.15	3.5e-07	+	112456073	112456733	0	1	660,	0
chr1	112456942	112457452	ENSG00000143079.15	4e-11	+	112456942	112457452	0	1	510,	0
chr1	112700655	112700746	ENSG00000155363.18	3e-10	+	112700655	112700746	0	1	91,	0
chr1	112956504	112957404	ENSG00000226419.8	1e-46	+	112956504	112957404	0	1	900,	0
chr1	112968429	112968490	ENSG00000226419.8	0.00083	+	112968429	112968490	0	1	61,	0
chr1	112968609	112968760	ENSG00000226419.8	6.5e-06	+	112968609	112968760	0	1	151,	0
chr1	113123898	113124259	ENSG00000198799.12	4e-54	+	113123898	113124259	0	1	361,	0
chr1	113390724	113390874	ENSG00000081026.19	5.5e-05	+	113390724	113390874	0	1	150,	0
chr1	113642007	113642368	ENSG00000081026.19	6.3e-59	+	113642007	113642368	0	1	361,	0
chr1	113683766	113683977	ENSG00000081026.19	4e-14	+	113683766	113683977	0	1	211,	0
chr1	113911387	113912407	ENSG00000118655.7	2.5e-45	+	113911387	113912407	0	1	1020,	0
chr1	113913276	113913337	ENSG00000118655.7	0.00026	+	113913276	113913337	0	1	61,	0
chr1	113929830	113929921	ENSG00000163349.22	4.6e-05	+	113929830	113929921	0	1	91,	0
chr1	113940413	113940654	ENSG00000163349.22	1e-14	+	113940413	113940654	0	1	241,	0
chr1	113940713	113941193	ENSG00000163349.22	1.6e-28	+	113940713	113941193	0	1	480,	0
chr1	115663693	115663874	ENSG00000173218.15	1.3e-10	+	115663693	115663874	0	1	181,	0
chr1	115685505	115691696	ENSG00000173218.15	5e-32	+	115685505	115691696	0	2	22,578,	0,5613
chr1	116909915	116910065	ENSG00000134247.10	3.2e-05	+	116909915	116910065	0	1	150,	0
chr1	116910244	116941946	ENSG00000134247.10	6.8e-07	+	116910244	116941946	0	2	8,232,	0,31470
chr1	116949416	116961655	ENSG00000134247.10	1e-121	+	116949416	116961655	0	2	156,413,	0,11826
chr1	116967076	116967166	ENSG00000134247.10	0.00028	+	116967076	116967166	0	1	90,	0
chr1	116986854	116987154	ENSG00000134247.10	1.3e-94	+	116986854	116987154	0	1	300,	0
chr1	117025643	117025764	ENSG00000134256.12	0.00021	+	117025643	117025764	0	1	121,	0
chr1	117036385	117036446	ENSG00000134256.12	0.0013	+	117036385	117036446	0	1	61,	0
chr1	117075128	117075279	ENSG00000116830.12	5e-11	+	117075128	117075279	0	1	151,	0
chr1	117075608	117075729	ENSG00000116830.12	0.0011	+	117075608	117075729	0	1	121,	0
chr1	117367448	117367658	ENSG00000198162.12	1e-12	+	117367448	117367658	0	1	210,	0
chr1	117368106	117368317	ENSG00000198162.12	2.9e-10	+	117368106	117368317	0	1	211,	0
chr1	117523006	117523126	ENSG00000198162.12	2.7e-06	+	117523006	117523126	0	1	120,	0
chr1	117523454	117523515	ENSG00000198162.12	0.0013	+	117523454	117523515	0	1	61,	0
chr1	117623034	117623244	ENSG00000183508.5	6.3e-14	+	117623034	117623244	0	1	210,	0
chr1	117623333	117623992	ENSG00000183508.5	1.6e-16	+	117623333	117623992	0	1	659,	0
chr1	117624141	117624202	ENSG00000183508.5	0.00052	+	117624141	117624202	0	1	61,	0
chr1	119140450	119140511	ENSG00000231365.6	0.0019	+	119140450	119140511	0	1	61,	0
chr1	119179007	119179187	ENSG00000231365.6	1.6e-07	+	119179007	119179187	0	1	180,	0
chr1	119179336	119179547	ENSG00000231365.6	1e-07	+	119179336	119179547	0	1	211,	0
chr1	119180204	119180535	ENSG00000231365.6	4e-24	+	119180204	119180535	0	1	331,	0
chr1	119183049	119183170	ENSG00000231365.6	0.00013	+	119183049	119183170	0	1	121,	0
chr1	120952709	120952889	ENSG00000226067.7	7.6e-07	+	120952709	120952889	0	1	180,	0
chr1	121184929	121185110	ENSG00000171943.11	1.9e-08	+	121184929	121185110	0	1	181,	0
chr1	121387818	121387999	ENSG00000171943.11	6e-06	+	121387818	121387999	0	1	181,	0
chr1	145670231	145670471	ENSG00000117262.19	2e-15	+	145670231	145670471	0	1	240,	0
chr1	145961416	145964422	ENSG00000278431.1	8.5e-06	+	145961416	145964422	0	2	157,48,	0,2958
chr1	145978372	145978492	ENSG00000121851.13	8.5e-06	+	145978372	145978492	0	1	120,	0
chr1	146058742	146058833	ENSG00000233396.8	0.0017	+	146058742	146058833	0	1	91,	0
chr1	146059341	146059492	ENSG00000233396.8	0.0011	+	146059341	146059492	0	1	151,	0
chr1	147618915	147619125	ENSG00000116128.11	4.4e-09	+	147618915	147619125	0	1	210,	0
chr1	147619213	147619662	ENSG00000116128.11	2.5e-20	+	147619213	147619662	0	1	449,	0
chr1	147620079	147620140	ENSG00000116128.11	0.0015	+	147620079	147620140	0	1	61,	0
chr1	147620199	147620946	ENSG00000116128.11	2.5e-17	+	147620199	147620946	0	1	747,	0
chr1	147623976	147624096	ENSG00000116128.11	0.00023	+	147623976	147624096	0	1	120,	0
chr1	147624364	147625201	ENSG00000116128.11	1.3e-75	+	147624364	147625201	0	1	837,	0
chr1	147993191	147993252	ENSG00000188092.14	0.0028	+	147993191	147993252	0	1	61,	0
chr1	148458960	148459078	ENSG00000280649.2	8.7e-05	+	148458960	148459078	0	1	118,	0
chr1	148459282	148459693	ENSG00000280649.2	1e-14	+	148459282	148459693	0	1	411,	0
chr1	148952467	148952588	ENSG00000178104.19	0.0003	+	148952467	148952588	0	1	121,	0
chr1	148953037	148953277	ENSG00000178104.19	4e-24	+	148953037	148953277	0	1	240,	0
chr1	148953426	148953667	ENSG00000178104.19	2e-11	+	148953426	148953667	0	1	241,	0
chr1	148981481	148981542	ENSG00000178104.19	1e-05	+	148981481	148981542	0	1	61,	0
chr1	149176104	149176195	ENSG00000274265.5	0.00043	+	149176104	149176195	0	1	91,	0
chr1	149607493	149636548	ENSG00000277147.6	0.00062	+	149607493	149636548	0	2	61,60,	0,28995
chr1	149607494	149608516	ENSG00000284964.1	0.00091	+	149607494	149608516	0	2	60,55,	0,967
chr1	149899844	149899904	ENSG00000178096.9	8.5e-06	+	149899844	149899904	0	1	60,	0
chr1	149899963	149900619	ENSG00000178096.9	1.6e-71	+	149899963	149900619	0	1	656,	0
chr1	150149782	150150212	ENSG00000023902.14	1.1e-08	+	150149782	150150212	0	2	4,297,	0,133
chr1	150158835	150159706	ENSG00000023902.14	0	+	150158835	150159706	0	1	871,	0
chr1	150470700	150470851	ENSG00000163125.15	3e-08	+	150470700	150470851	0	1	151,	0
chr1	150471030	150471270	ENSG00000163125.15	7.9e-16	+	150471030	150471270	0	1	240,	0
chr1	150471538	150473454	ENSG00000163125.15	1e-110	+	150471538	150473454	0	1	1916,	0
chr1	150506919	150507399	ENSG00000143374.17	1e-185	+	150506919	150507399	0	1	480,	0
chr1	150950659	150950930	ENSG00000143379.12	4e-31	+	150950659	150950930	0	1	271,	0
chr1	150960562	150961377	ENSG00000143379.12	1e-178	+	150960562	150961377	0	2	629,61,	0,754
chr1	151033926	151034641	ENSG00000143363.17	1.3e-34	+	151033926	151034641	0	1	715,	0
chr1	151047629	151047690	ENSG00000163141.19	0.0071	+	151047629	151047690	0	1	61,	0
chr1	151048546	151048666	ENSG00000143443.9	0.00011	+	151048546	151048666	0	1	120,	0
chr1	151117999	151118299	ENSG00000143458.12	1e-12	+	151117999	151118299	0	1	300,	0
chr1	151198709	151198860	ENSG00000143398.20	3.8e-05	+	151198709	151198860	0	1	151,	0
chr1	151233763	151234355	ENSG00000143398.20	1.7e-06	+	151233763	151234355	0	2	21,159,	0,433
chr1	151248072	151248372	ENSG00000143398.20	4e-81	+	151248072	151248372	0	1	300,	0
chr1	151267268	151267449	ENSG00000159352.15	1.3e-13	+	151267268	151267449	0	1	181,	0
chr1	151281707	151285235	ENSG00000143373.18	7.9e-47	+	151281707	151285235	0	3	372,108,30,	0,580,3498
chr1	151286333	151288402	ENSG00000143373.18	1e-147	+	151286333	151288402	0	1	2069,	0
chr1	151289509	151289707	ENSG00000143373.18	0.00091	+	151289509	151289707	0	2	31,30,	0,168
chr1	151291456	151291667	ENSG00000143373.18	2.5e-14	+	151291456	151291667	0	1	211,	0
chr1	151518688	151518838	ENSG00000143375.15	6.2e-05	+	151518688	151518838	0	1	150,	0
chr1	151518987	151519317	ENSG00000143375.15	5e-11	+	151518987	151519317	0	1	330,	0
chr1	151530511	151530691	ENSG00000143375.15	1.7e-07	+	151530511	151530691	0	1	180,	0
chr1	151532555	151534018	ENSG00000143375.15	0.0011	+	151532555	151534018	0	2	17,44,	0,1419
chr1	151581644	151581913	ENSG00000143367.16	4.9e-08	+	151581644	151581913	0	1	269,	0
chr1	151791066	151791126	ENSG00000203288.4	0.0017	+	151791066	151791126	0	1	60,	0
chr1	153629180	153629241	ENSG00000160678.11	0.0019	+	153629180	153629241	0	1	61,	0
chr1	153631558	153631679	ENSG00000160678.11	3e-05	+	153631558	153631679	0	1	121,	0
chr1	153634041	153634281	ENSG00000160679.13	5.4e-10	+	153634041	153634281	0	1	240,	0
chr1	153643234	153643414	ENSG00000160679.13	9.1e-09	+	153643234	153643414	0	1	180,	0
chr1	153644371	153645498	ENSG00000160679.13	1e-242	+	153644371	153645498	0	2	14,435,	0,692
chr1	153661265	153661385	ENSG00000143553.10	8.7e-08	+	153661265	153661385	0	1	120,	0
chr1	153773218	153773309	ENSG00000143624.14	2.2e-05	+	153773218	153773309	0	1	91,	0
chr1	153773577	153773698	ENSG00000143624.14	2.7e-09	+	153773577	153773698	0	1	121,	0
chr1	153775279	153775340	ENSG00000143554.14	0.00054	+	153775279	153775340	0	1	61,	0
chr1	153775489	153776028	ENSG00000143554.14	1e-30	+	153775489	153776028	0	1	539,	0
chr1	153934738	153934828	ENSG00000284738.1	0.0018	+	153934738	153934828	0	1	90,	0
chr1	153977801	153977861	ENSG00000272654.1	0.0017	+	153977801	153977861	0	1	60,	0
chr1	153978421	153978599	ENSG00000272654.1	3.5e-06	+	153978421	153978599	0	1	178,	0
chr1	154272990	154273260	ENSG00000143575.14	7.9e-11	+	154272990	154273260	0	1	270,	0
chr1	154325552	154327836	ENSG00000143515.17	2e-60	+	154325552	154327836	0	2	150,90,	0,2194
chr1	154349032	154349660	ENSG00000143515.17	1e-215	+	154349032	154349660	0	1	628,	0
chr1	154465237	154465806	ENSG00000160712.13	2e-24	+	154465237	154465806	0	1	569,	0
chr1	154961824	154962268	ENSG00000271380.1	1.3e-53	+	154961824	154962268	0	1	444,	0
chr1	154962386	154962505	ENSG00000271380.1	4.9e-06	+	154962386	154962505	0	1	119,	0
chr1	154983337	154983518	ENSG00000160688.19	2.2e-07	+	154983337	154983518	0	1	181,	0
chr1	154984027	154988896	ENSG00000160688.19	1e-105	+	154984027	154988896	0	2	39,1431,	0,3438
chr1	155002629	155010303	ENSG00000160685.13	1.3e-30	+	155002629	155010303	0	2	314,46,	0,7628
chr1	155014651	155015727	ENSG00000160685.13	2.5e-66	+	155014651	155015727	0	1	1076,	0
chr1	155016221	155016879	ENSG00000160685.13	1e-274	+	155016221	155016879	0	1	658,	0
chr1	155017027	155017297	ENSG00000160685.13	1.3e-10	+	155017027	155017297	0	1	270,	0
chr1	155018222	155018403	ENSG00000160685.13	1.4e-06	+	155018222	155018403	0	1	181,	0
chr1	155062594	155062715	ENSG00000143537.13	0.00054	+	155062594	155062715	0	1	121,	0
chr1	155069074	155069433	ENSG00000243364.8	1.3e-13	+	155069074	155069433	0	1	359,	0
chr1	155133979	155134069	ENSG00000169242.12	0.001	+	155133979	155134069	0	1	90,	0
chr1	155134394	155134484	ENSG00000169242.12	0.00021	+	155134394	155134484	0	1	90,	0
chr1	155138346	155138467	ENSG00000169241.19	2.2e-09	+	155138346	155138467	0	1	121,	0
chr1	155208966	155209116	ENSG00000173171.14	0.00026	+	155208966	155209116	0	1	150,	0
chr1	155287876	155288056	ENSG00000143630.10	1.8e-08	+	155287876	155288056	0	1	180,	0
chr1	155288294	155288385	ENSG00000143630.10	0.00091	+	155288294	155288385	0	1	91,	0
chr1	155324501	155324622	ENSG00000160753.16	0.00012	+	155324501	155324622	0	1	121,	0
chr1	155326649	155326860	ENSG00000160753.16	4.2e-09	+	155326649	155326860	0	1	211,	0
chr1	155563000	155563679	ENSG00000235919.4	1e-112	+	155563000	155563679	0	1	679,	0
chr1	155614339	155614758	ENSG00000125459.15	6.3e-52	+	155614339	155614758	0	1	419,	0
chr1	155689145	155689326	ENSG00000132676.16	1.7e-06	+	155689145	155689326	0	1	181,	0
chr1	155738200	155738500	ENSG00000132676.16	1e-67	+	155738200	155738500	0	1	300,	0
chr1	156055327	156055538	ENSG00000116586.11	1.6e-12	+	156055327	156055538	0	1	211,	0
chr1	156058389	156058510	ENSG00000116586.11	4e-11	+	156058389	156058510	0	1	121,	0
chr1	156114673	156114914	ENSG00000160789.20	1.3e-16	+	156114673	156114914	0	1	241,	0
chr1	156136959	156137080	ENSG00000160789.20	0.00072	+	156136959	156137080	0	1	121,	0
chr1	156200191	156200461	ENSG00000160785.13	7.9e-67	+	156200191	156200461	0	1	270,	0
chr1	156210344	156210704	ENSG00000160785.13	4e-25	+	156210344	156210704	0	1	360,	0
chr1	156212586	156212766	ENSG00000160785.13	3.8e-08	+	156212586	156212766	0	1	180,	0
chr1	156284390	156285227	ENSG00000163472.19	0.0019	+	156284390	156285227	0	2	16,44,	0,793
chr1	156285791	156285851	ENSG00000163472.19	0.0019	+	156285791	156285851	0	1	60,	0
chr1	156291475	156292189	ENSG00000163472.19	2e-68	+	156291475	156292189	0	1	714,	0
chr1	156292887	156292977	ENSG00000163472.19	3.4e-06	+	156292887	156292977	0	1	90,	0
chr1	156625158	156625487	ENSG00000132702.13	0.00052	+	156625158	156625487	0	1	329,	0
chr1	156728531	156732336	ENSG00000143303.12	6.3e-70	+	156728531	156732336	0	3	684,47,346,	0,984,3459
chr1	156734251	156734461	ENSG00000143303.12	4.6e-06	+	156734251	156734461	0	1	210,	0
chr1	156768220	156787050	ENSG00000143294.15	1e-175	+	156768220	156787050	0	3	19,48,443,	0,14061,18387
chr1	156797243	156800546	ENSG00000143294.15	5e-11	+	156797243	156800546	0	2	98,173,	0,3130
chr1	158094754	158095264	ENSG00000183853.18	1.3e-20	+	158094754	158095264	0	1	510,	0
chr1	158095443	158095623	ENSG00000183853.18	1.7e-09	+	158095443	158095623	0	1	180,	0
chr1	158184569	158184777	ENSG00000158473.6	2.8e-07	+	158184569	158184777	0	1	208,	0
chr1	160343345	160343406	ENSG00000162736.17	6e-06	+	160343345	160343406	0	1	61,	0
chr1	160370705	160370914	ENSG00000171786.6	1.9e-09	+	160370705	160370914	0	1	209,	0
chr1	160371151	160371211	ENSG00000171786.6	0.0045	+	160371151	160371211	0	1	60,	0
chr1	160419031	160419211	ENSG00000162738.6	2.5e-07	+	160419031	160419211	0	1	180,	0
chr1	160424276	160425500	ENSG00000162738.6	6.3e-11	+	160424276	160425500	0	2	7,383,	0,841
chr1	161118294	161118415	ENSG00000158793.14	8.5e-05	+	161118294	161118415	0	1	121,	0
chr1	161120708	161121008	ENSG00000158793.14	4e-24	+	161120708	161121008	0	1	300,	0
chr1	161124190	161124250	ENSG00000158793.14	0.00074	+	161124190	161124250	0	1	60,	0
chr1	161158615	161158766	ENSG00000143222.12	3.6e-07	+	161158615	161158766	0	1	151,	0
chr1	161160720	161161079	ENSG00000143258.16	1.6e-18	+	161160720	161161079	0	1	359,	0
chr1	161228812	161229400	ENSG00000158882.15	1e-38	+	161228812	161229400	0	2	5,445,	0,143
chr1	161230027	161230148	ENSG00000158882.15	0.00063	+	161230027	161230148	0	1	121,	0
chr1	161230237	161230746	ENSG00000158882.15	1.6e-92	+	161230237	161230746	0	1	509,	0
chr1	161362710	161362891	ENSG00000143252.14	5.6e-08	+	161362710	161362891	0	1	181,	0
chr1	161400145	161400235	ENSG00000288093.1	0.0045	+	161400145	161400235	0	1	90,	0
chr1	161525999	161526179	ENSG00000173110.8	0.00026	+	161525999	161526179	0	1	180,	0
chr1	161958598	161958838	ENSG00000118217.6	5e-49	+	161958598	161958838	0	1	240,	0
chr1	162381982	162382188	ENSG00000254706.3	1.5e-05	+	162381982	162382188	0	1	206,	0
chr1	162381985	162382196	ENSG00000239887.6	1.1e-05	+	162381985	162382196	0	1	211,	0
chr1	162383397	162383488	ENSG00000239887.6	0.0025	+	162383397	162383488	0	1	91,	0
chr1	162383846	162384087	ENSG00000239887.6	6.2e-06	+	162383846	162384087	0	1	241,	0
chr1	162566115	162566236	ENSG00000117143.13	6.5e-05	+	162566115	162566236	0	1	121,	0
chr1	162780237	162780478	ENSG00000162733.18	1.3e-29	+	162780237	162780478	0	1	241,	0
chr1	164559303	164559364	ENSG00000185630.18	0.003	+	164559303	164559364	0	1	61,	0
chr1	164559737	164560008	ENSG00000185630.18	2e-17	+	164559737	164560008	0	1	271,	0
chr1	165907961	165908022	ENSG00000143179.16	2.8e-05	+	165907961	165908022	0	1	61,	0
chr1	166849184	166850533	ENSG00000143157.11	3.2e-78	+	166849184	166850533	0	1	1349,	0
chr1	166852659	166853019	ENSG00000143157.11	2.5e-16	+	166852659	166853019	0	1	360,	0
chr1	167415539	167416199	ENSG00000143190.23	1e-137	+	167415539	167416199	0	1	660,	0
chr1	167721690	167721924	ENSG00000197965.12	0.00026	+	167721690	167721924	0	2	60,61,	0,173
chr1	168225997	168226058	ENSG00000213064.10	0.0015	+	168225997	168226058	0	1	61,	0
chr1	168239154	168242825	ENSG00000213064.10	1.3e-21	+	168239154	168242825	0	2	6,325,	0,3346
chr1	169853479	169853690	ENSG00000000460.17	5.8e-05	+	169853479	169853690	0	1	211,	0
chr1	171532547	171532907	ENSG00000117523.16	1e-116	+	171532547	171532907	0	1	360,	0
chr1	171540722	171541562	ENSG00000117523.16	1e-236	+	171540722	171541562	0	1	840,	0
chr1	171541861	171542072	ENSG00000117523.16	1.3e-35	+	171541861	171542072	0	1	211,	0
chr1	171557795	171557946	ENSG00000117523.16	8.9e-10	+	171557795	171557946	0	1	151,	0
chr1	171591652	171592013	ENSG00000117523.16	1e-129	+	171591652	171592013	0	1	361,	0
chr1	171783787	171784117	ENSG00000010165.20	2e-15	+	171783787	171784117	0	1	330,	0
chr1	171784295	171785885	ENSG00000010165.20	2e-17	+	171784295	171785885	0	2	204,7,	0,1583
chr1	171796489	171796909	ENSG00000010165.20	1e-145	+	171796489	171796909	0	1	420,	0
chr1	172610008	172610368	ENSG00000094975.14	4e-28	+	172610008	172610368	0	1	360,	0
chr1	173733965	173734175	ENSG00000076321.11	1.4e-10	+	173733965	173734175	0	1	210,	0
chr1	173824861	173825281	ENSG00000117593.12	2e-45	+	173824861	173825281	0	1	420,	0
chr1	173870855	173871036	ENSG00000185278.15	9.5e-08	+	173870855	173871036	0	1	181,	0
chr1	173886064	173886125	ENSG00000185278.15	0.00091	+	173886064	173886125	0	1	61,	0
chr1	173886244	173886395	ENSG00000185278.15	0.00026	+	173886244	173886395	0	1	151,	0
chr1	173894611	173894672	ENSG00000185278.15	0.00068	+	173894611	173894672	0	1	61,	0
chr1	174988720	174989911	ENSG00000152061.23	5.5e-06	+	174988720	174989911	0	2	118,63,	0,1128
chr1	178458138	178458409	ENSG00000075391.16	1.6e-11	+	178458138	178458409	0	1	271,	0
chr1	178473171	178473352	ENSG00000075391.16	8.3e-06	+	178473171	178473352	0	1	181,	0
chr1	178542781	178544920	ENSG00000213057.5	6.2e-05	+	178542781	178544920	0	2	104,46,	0,2093
chr1	178545342	178545492	ENSG00000213057.5	0.00026	+	178545342	178545492	0	1	150,	0
chr1	178906830	178916683	ENSG00000116191.17	1.3e-19	+	178906830	178916683	0	2	37,354,	0,9499
chr1	179043963	179044083	ENSG00000116199.12	3.1e-05	+	179043963	179044083	0	1	120,	0
chr1	179072047	179072557	ENSG00000116199.12	6.3e-68	+	179072047	179072557	0	1	510,	0
chr1	179087959	179088109	ENSG00000186283.14	4.6e-06	+	179087959	179088109	0	1	150,	0
chr1	179095117	179095446	ENSG00000186283.14	1e-223	+	179095117	179095446	0	1	329,	0
chr1	179353591	179353951	ENSG00000057252.13	1.8e-07	+	179353591	179353951	0	1	360,	0
chr1	179917751	179918261	ENSG00000143337.18	4e-24	+	179917751	179918261	0	1	510,	0
chr1	179922184	179922364	ENSG00000143337.18	3e-05	+	179922184	179922364	0	1	180,	0
chr1	179996823	179997033	ENSG00000135837.16	2.6e-07	+	179996823	179997033	0	1	210,	0
chr1	180020297	180020418	ENSG00000135837.16	8.9e-05	+	180020297	180020418	0	1	121,	0
chr1	180093981	180094072	ENSG00000135837.16	0.0001	+	180093981	180094072	0	1	91,	0
chr1	180111159	180111430	ENSG00000135837.16	2e-16	+	180111159	180111430	0	1	271,	0
chr1	179969212	179969418	ENSG00000235145.2	9.5e-05	+	179969212	179969418	0	1	206,	0
chr1	180194381	180196999	ENSG00000116260.17	6.3e-31	+	180194381	180196999	0	2	11,738,	0,1880
chr1	180197417	180197657	ENSG00000116260.17	2.8e-09	+	180197417	180197657	0	1	240,	0
chr1	180230293	180230444	ENSG00000121454.6	0.00036	+	180230293	180230444	0	1	151,	0
chr1	180274188	180274399	ENSG00000121454.6	6.2e-10	+	180274188	180274399	0	1	211,	0
chr1	180274937	180275028	ENSG00000121454.6	0.00016	+	180274937	180275028	0	1	91,	0
chr1	180632063	180632214	ENSG00000143324.13	3.5e-05	+	180632063	180632214	0	1	151,	0
chr1	180884225	180884526	ENSG00000143324.13	6.3e-27	+	180884225	180884526	0	1	301,	0
chr1	180935302	180935423	ENSG00000135835.12	0.0019	+	180935302	180935423	0	1	121,	0
chr1	180935631	180935872	ENSG00000135835.12	6.9e-05	+	180935631	180935872	0	1	241,	0
chr1	181055346	181055826	ENSG00000153029.14	3e-09	+	181055346	181055826	0	1	480,	0
chr1	181056634	181056755	ENSG00000153029.14	6.2e-05	+	181056634	181056755	0	1	121,	0
chr1	181088711	181090596	ENSG00000162783.10	1e-256	+	181088711	181090596	0	1	1885,	0
chr1	183023419	183023989	ENSG00000135862.6	2.5e-47	+	183023419	183023989	0	1	570,	0
chr1	183142596	183143017	ENSG00000135862.6	7.9e-89	+	183142596	183143017	0	1	421,	0
chr1	183551913	183552063	ENSG00000116698.21	2.3e-05	+	183551913	183552063	0	1	150,	0
chr1	183553049	183553260	ENSG00000116698.21	1.8e-07	+	183553049	183553260	0	1	211,	0
chr1	183926163	183926403	ENSG00000143344.15	1e-10	+	183926163	183926403	0	1	240,	0
chr1	183926762	183926973	ENSG00000143344.15	0.00026	+	183926762	183926973	0	1	211,	0
chr1	185174956	185175017	ENSG00000116668.13	0.00026	+	185174956	185175017	0	1	61,	0
chr1	185317865	185317923	ENSG00000273004.1	0.0046	+	185317865	185317923	0	1	58,	0
chr1	192811558	192811768	ENSG00000116741.8	3.1e-09	+	192811558	192811768	0	1	210,	0
chr1	193059421	193059602	ENSG00000116747.12	8.1e-07	+	193059421	193059602	0	1	181,	0
chr1	200048346	200048497	ENSG00000116833.14	0.00052	+	200048346	200048497	0	1	151,	0
chr1	200174157	200174367	ENSG00000116833.14	1e-10	+	200174157	200174367	0	1	210,	0
chr1	200739557	200739917	ENSG00000118200.14	2.5e-22	+	200739557	200739917	0	1	360,	0
chr1	200848886	200849276	ENSG00000118200.14	3.2e-14	+	200848886	200849276	0	1	390,	0
chr1	200849843	200850024	ENSG00000118200.14	4.4e-09	+	200849843	200850024	0	1	181,	0
chr1	200857772	200858192	ENSG00000118200.14	3e-08	+	200857772	200858192	0	1	420,	0
chr1	201623304	201623455	ENSG00000134369.15	3.5e-06	+	201623304	201623455	0	1	151,	0
chr1	201648854	201648915	ENSG00000134369.15	0.00085	+	201648854	201648915	0	1	61,	0
chr1	201782629	201782869	ENSG00000134369.15	7.9e-15	+	201782629	201782869	0	1	240,	0
chr1	201819894	201820464	ENSG00000134369.15	2.5e-86	+	201819894	201820464	0	1	570,	0
chr1	201821662	201821963	ENSG00000134369.15	3.9e-10	+	201821662	201821963	0	1	301,	0
chr1	201829148	201829209	ENSG00000198700.10	3e-05	+	201829148	201829209	0	1	61,	0
chr1	201876105	201876556	ENSG00000198700.10	1e-151	+	201876105	201876556	0	1	451,	0
chr1	201878084	201878534	ENSG00000198700.10	1.3e-23	+	201878084	201878534	0	1	450,	0
chr1	201878953	201879314	ENSG00000198700.10	6.3e-29	+	201878953	201879314	0	1	361,	0
chr1	201892039	201892099	ENSG00000198892.6	0.00081	+	201892039	201892099	0	1	60,	0
chr1	201969555	201969826	ENSG00000134375.11	6.3e-38	+	201969555	201969826	0	1	271,	0
chr1	202438541	202438601	ENSG00000232626.3	0.003	+	202438541	202438601	0	1	60,	0
chr1	202438746	202438952	ENSG00000232626.3	5.5e-05	+	202438746	202438952	0	1	206,	0
chr1	203165788	203165879	ENSG00000163485.17	0.0046	+	203165788	203165879	0	1	91,	0
chr1	203166297	203166597	ENSG00000163485.17	8.7e-06	+	203166297	203166597	0	1	300,	0
chr1	203307145	203307535	ENSG00000159388.6	2.5e-09	+	203307145	203307535	0	1	390,	0
chr1	203307624	203307865	ENSG00000159388.6	6e-08	+	203307624	203307865	0	1	241,	0
chr1	203683069	203683339	ENSG00000058668.14	5e-15	+	203683069	203683339	0	1	270,	0
chr1	203739773	203740103	ENSG00000058668.14	6.8e-05	+	203739773	203740103	0	1	330,	0
chr1	203740850	203740911	ENSG00000058668.14	0.0012	+	203740850	203740911	0	1	61,	0
chr1	203797110	203797351	ENSG00000058673.16	1.3e-16	+	203797110	203797351	0	1	241,	0
chr1	203798399	203798610	ENSG00000058673.16	5.5e-06	+	203798399	203798610	0	1	211,	0
chr1	203798938	203799089	ENSG00000058673.16	9.5e-05	+	203798938	203799089	0	1	151,	0
chr1	203847468	203847559	ENSG00000058673.16	0.00015	+	203847468	203847559	0	1	91,	0
chr1	203852241	203852541	ENSG00000058673.16	6.3e-36	+	203852241	203852541	0	1	300,	0
chr1	203852630	203852811	ENSG00000058673.16	6.5e-06	+	203852630	203852811	0	1	181,	0
chr1	203853619	203853950	ENSG00000058673.16	4e-36	+	203853619	203853950	0	1	331,	0
chr1	203797120	203797360	ENSG00000257315.2	3.2e-17	+	203797120	203797360	0	1	240,	0
chr1	203798407	203798617	ENSG00000257315.2	2.2e-05	+	203798407	203798617	0	1	210,	0
chr1	203798945	203799096	ENSG00000257315.2	9.5e-05	+	203798945	203799096	0	1	151,	0
chr1	203847462	203847553	ENSG00000257315.2	0.00037	+	203847462	203847553	0	1	91,	0
chr1	203852245	203852545	ENSG00000257315.2	1.3e-35	+	203852245	203852545	0	1	300,	0
chr1	203852634	203852814	ENSG00000257315.2	6.5e-06	+	203852634	203852814	0	1	180,	0
chr1	203853591	203853952	ENSG00000257315.2	1.6e-34	+	203853591	203853952	0	1	361,	0
chr1	204122255	204122435	ENSG00000143842.15	6.6e-05	+	204122255	204122435	0	1	180,	0
chr1	204125977	204126367	ENSG00000143842.15	4e-50	+	204125977	204126367	0	1	390,	0
chr1	204549241	204549692	ENSG00000198625.13	1e-221	+	204549241	204549692	0	1	451,	0
chr1	205228154	205228453	ENSG00000133069.17	3e-05	+	205228154	205228453	0	1	299,	0
chr1	205241714	205241924	ENSG00000133069.17	6.6e-05	+	205241714	205241924	0	1	210,	0
chr1	205268954	205271145	ENSG00000133069.17	1e-95	+	205268954	205271145	0	2	930,26,	0,2165
chr1	205271940	205272150	ENSG00000133069.17	0.00036	+	205271940	205272150	0	1	210,	0
chr1	205529158	205529219	ENSG00000117266.15	0.0019	+	205529158	205529219	0	1	61,	0
chr1	205531444	205531715	ENSG00000117266.15	9.5e-06	+	205531444	205531715	0	1	271,	0
chr1	206454175	206454536	ENSG00000266028.7	4.8e-05	+	206454175	206454536	0	1	361,	0
chr1	206455943	206456124	ENSG00000266028.7	7.9e-11	+	206455943	206456124	0	1	181,	0
chr1	206461205	206461326	ENSG00000266028.7	0.00048	+	206461205	206461326	0	1	121,	0
chr1	206461385	206461566	ENSG00000266028.7	7.9e-06	+	206461385	206461566	0	1	181,	0
chr1	206463933	206464113	ENSG00000266028.7	2.3e-07	+	206463933	206464113	0	1	180,	0
chr1	206586992	206587233	ENSG00000266094.7	6.3e-12	+	206586992	206587233	0	1	241,	0
chr1	206647573	206648114	ENSG00000143479.17	6.3e-14	+	206647573	206648114	0	1	541,	0
chr1	206648323	206648683	ENSG00000143479.17	1.6e-23	+	206648323	206648683	0	1	360,	0
chr1	206685123	206685244	ENSG00000162889.10	0.00074	+	206685123	206685244	0	1	121,	0
chr1	206732634	206733025	ENSG00000162889.10	1e-234	+	206732634	206733025	0	1	391,	0
chr1	209675951	209676215	ENSG00000123689.6	3.2e-09	+	209675951	209676215	0	1	264,	0
chr1	210242190	210242400	ENSG00000082497.12	4.2e-08	+	210242190	210242400	0	1	210,	0
chr1	211313842	211313903	ENSG00000117625.13	0.0012	+	211313842	211313903	0	1	61,	0
chr1	211372398	211372848	ENSG00000082512.15	1.6e-20	+	211372398	211372848	0	1	450,	0
chr1	211417083	211417204	ENSG00000236809.2	0.0045	+	211417083	211417204	0	1	121,	0
chr1	212100616	212100856	ENSG00000143476.18	3.2e-28	+	212100616	212100856	0	1	240,	0
chr1	212100974	212102881	ENSG00000143476.18	2.8e-06	+	212100974	212102881	0	2	110,40,	0,1867
chr1	212285499	212285649	ENSG00000066027.12	9.8e-07	+	212285499	212285649	0	1	150,	0
chr1	212619549	212619700	ENSG00000162772.17	0.0017	+	212619549	212619700	0	1	151,	0
chr1	212858274	212859051	ENSG00000162769.13	1e-107	+	212858274	212859051	0	1	777,	0
chr1	212950549	212950730	ENSG00000143494.15	6.2e-05	+	212950549	212950730	0	1	181,	0
chr1	212952620	212952771	ENSG00000143494.15	5.5e-06	+	212952620	212952771	0	1	151,	0
chr1	212972667	212972848	ENSG00000143494.15	1.2e-06	+	212972667	212972848	0	1	181,	0
chr1	213241618	213241709	ENSG00000136643.12	0.00016	+	213241618	213241709	0	1	91,	0
chr1	213241947	213242187	ENSG00000136643.12	4e-14	+	213241947	213242187	0	1	240,	0
chr1	213997199	213997319	ENSG00000117707.15	0.0011	+	213997199	213997319	0	1	120,	0
chr1	213997468	213997619	ENSG00000117707.15	8.7e-06	+	213997468	213997619	0	1	151,	0
chr1	214532312	214532402	ENSG00000215819.3	0.0013	+	214532312	214532402	0	1	90,	0
chr1	214640297	214640478	ENSG00000117724.13	7.9e-15	+	214640297	214640478	0	1	181,	0
chr1	214642661	214642782	ENSG00000117724.13	0.00028	+	214642661	214642782	0	1	121,	0
chr1	214644582	214644822	ENSG00000117724.13	6.3e-55	+	214644582	214644822	0	1	240,	0
chr1	214645510	214645840	ENSG00000117724.13	2.5e-62	+	214645510	214645840	0	1	330,	0
chr1	214645929	214645989	ENSG00000117724.13	0.00035	+	214645929	214645989	0	1	60,	0
chr1	214646587	214646708	ENSG00000117724.13	0.00035	+	214646587	214646708	0	1	121,	0
chr1	214647096	214647306	ENSG00000117724.13	5e-12	+	214647096	214647306	0	1	210,	0
chr1	214663612	214663853	ENSG00000117724.13	4e-14	+	214663612	214663853	0	1	241,	0
chr1	215620104	215620225	ENSG00000136636.13	0.00074	+	215620104	215620225	0	1	121,	0
chr1	218330974	218331155	ENSG00000067533.6	2e-12	+	218330974	218331155	0	1	181,	0
chr1	220661887	220662127	ENSG00000116141.15	1.8e-08	+	220661887	220662127	0	1	240,	0
chr1	220696709	220696948	ENSG00000162817.7	2.5e-14	+	220696709	220696948	0	1	239,	0
chr1	220697037	220697127	ENSG00000162817.7	0.00013	+	220697037	220697127	0	1	90,	0
chr1	220697186	220697544	ENSG00000162817.7	7.9e-13	+	220697186	220697544	0	1	358,	0
chr1	220698079	220698408	ENSG00000162817.7	1.3e-19	+	220698079	220698408	0	1	329,	0
chr1	220755078	220756325	ENSG00000117791.16	3.5e-05	+	220755078	220756325	0	2	42,48,	0,1199
chr1	220813907	220813998	ENSG00000186205.13	1.3e-05	+	220813907	220813998	0	1	91,	0
chr1	220882329	220884503	ENSG00000286231.1	1.6e-69	+	220882329	220884503	0	2	19,309,	0,1865
chr1	220879819	220879910	ENSG00000136630.13	0.00019	+	220879819	220879910	0	1	91,	0
chr1	220880508	220880569	ENSG00000136630.13	0.0013	+	220880508	220880569	0	1	61,	0
chr1	220884220	220885059	ENSG00000136630.13	2e-72	+	220884220	220885059	0	1	839,	0
chr1	222627955	222628136	ENSG00000154305.18	2.5e-11	+	222627955	222628136	0	1	181,	0
chr1	222628614	222628675	ENSG00000154305.18	0.0035	+	222628614	222628675	0	1	61,	0
chr1	222628943	222629124	ENSG00000154305.18	2.5e-08	+	222628943	222629124	0	1	181,	0
chr1	222629602	222630112	ENSG00000154305.18	4e-44	+	222629602	222630112	0	1	510,	0
chr1	222665430	222665641	ENSG00000154305.18	1.5e-09	+	222665430	222665641	0	1	211,	0
chr1	223002646	223002886	ENSG00000154309.8	2.4e-10	+	223002646	223002886	0	1	240,	0
chr1	223003871	223004052	ENSG00000154309.8	1.9e-09	+	223003871	223004052	0	1	181,	0
chr1	223005067	223005397	ENSG00000154309.8	4e-06	+	223005067	223005397	0	1	330,	0
chr1	223005546	223005816	ENSG00000154309.8	4e-25	+	223005546	223005816	0	1	270,	0
chr1	223752950	223757373	ENSG00000162909.18	1.8e-08	+	223752950	223757373	0	3	6,170,5,	0,2529,4418
chr1	223757707	223757858	ENSG00000162909.18	3e-06	+	223757707	223757858	0	1	151,	0
chr1	224157404	224157645	ENSG00000143756.12	2.5e-12	+	224157404	224157645	0	1	241,	0
chr1	224157824	224158004	ENSG00000143756.12	2.9e-06	+	224157824	224158004	0	1	180,	0
chr1	224175904	224183376	ENSG00000143753.13	2.9e-10	+	224175904	224183376	0	2	43,137,	0,7335
chr1	224189585	224189854	ENSG00000143753.13	1.3e-63	+	224189585	224189854	0	1	269,	0
chr1	224192426	224192696	ENSG00000143753.13	6.3e-32	+	224192426	224192696	0	1	270,	0
chr1	224434659	224434948	ENSG00000143786.8	4e-36	+	224434659	224434948	0	2	203,37,	0,252
chr1	224616569	224616689	ENSG00000143786.8	0.00043	+	224616569	224616689	0	1	120,	0
chr1	226062059	226062857	ENSG00000163041.11	7.1e-08	+	226062059	226062857	0	2	35,144,	0,654
chr1	226895686	226895956	ENSG00000143801.17	5e-31	+	226895686	226895956	0	1	270,	0
chr1	226939559	226940434	ENSG00000163050.17	2.4e-06	+	226939559	226940434	0	2	32,149,	0,726
chr1	226961529	226974974	ENSG00000163050.17	5e-48	+	226961529	226974974	0	4	33,411,67,120,	0,3470,4141,13325
chr1	226986704	226986885	ENSG00000163050.17	7.6e-09	+	226986704	226986885	0	1	181,	0
chr1	227654350	227654591	ENSG00000181450.17	6.3e-28	+	227654350	227654591	0	1	241,	0
chr1	227677292	227677443	ENSG00000181450.17	5.2e-07	+	227677292	227677443	0	1	151,	0
chr1	227728688	227732696	ENSG00000143740.14	1e-273	+	227728688	227732696	0	3	98,163,308,	0,2896,3700
chr1	227732755	227732845	ENSG00000143740.14	4e-13	+	227732755	227732845	0	1	90,	0
chr1	227733143	227733324	ENSG00000143740.14	2.5e-14	+	227733143	227733324	0	1	181,	0
chr1	227734070	227734221	ENSG00000143740.14	5.8e-10	+	227734070	227734221	0	1	151,	0
chr1	227747697	227747758	ENSG00000143740.14	0.00044	+	227747697	227747758	0	1	61,	0
chr1	227747936	227759117	ENSG00000143740.14	1e-191	+	227747936	227759117	0	2	297,123,	0,11058
chr1	227766960	227770687	ENSG00000143740.14	2.5e-20	+	227766960	227770687	0	2	123,117,	0,3610
chr1	227776926	227781141	ENSG00000143740.14	0	+	227776926	227781141	0	2	44,615,	0,3600
chr1	228059623	228059684	ENSG00000154342.6	0.0028	+	228059623	228059684	0	1	61,	0
chr1	228097899	228098049	ENSG00000143761.16	7.9e-21	+	228097899	228098049	0	1	150,	0
chr1	228141565	228144329	ENSG00000143774.16	2.5e-14	+	228141565	228144329	0	2	268,2,	0,2762
chr1	228157987	228158640	ENSG00000198835.4	7.6e-07	+	228157987	228158640	0	1	653,	0
chr1	228158699	228158937	ENSG00000198835.4	3e-06	+	228158699	228158937	0	1	238,	0
chr1	228174755	228175568	ENSG00000181873.13	1e-151	+	228174755	228175568	0	2	274,447,	0,366
chr1	228175777	228175898	ENSG00000181873.13	0.00019	+	228175777	228175898	0	1	121,	0
chr1	228176527	228176678	ENSG00000181873.13	0.00049	+	228176527	228176678	0	1	151,	0
chr1	228212152	228212513	ENSG00000154358.21	3.3e-06	+	228212152	228212513	0	1	361,	0
chr1	228212721	228213541	ENSG00000154358.21	5.5e-06	+	228212721	228213541	0	2	50,101,	0,719
chr1	228256853	228259518	ENSG00000154358.21	0.00034	+	228256853	228259518	0	2	73,18,	0,2647
chr1	228288118	228288269	ENSG00000154358.21	0.00026	+	228288118	228288269	0	1	151,	0
chr1	228291976	228292728	ENSG00000154358.21	4.7e-06	+	228291976	228292728	0	2	185,206,	0,546
chr1	228293472	228294158	ENSG00000154358.21	8.7e-05	+	228293472	228294158	0	2	144,7,	0,679
chr1	228294911	228295002	ENSG00000154358.21	0.0045	+	228294911	228295002	0	1	91,	0
chr1	228360040	228360221	ENSG00000154358.21	0.00014	+	228360040	228360221	0	1	181,	0
chr1	228374207	228374297	ENSG00000154358.21	0.00068	+	228374207	228374297	0	1	90,	0
chr1	228394319	228396967	ENSG00000270094.1	7.9e-25	+	228394319	228396967	0	3	129,96,225,	0,1391,2423
chr1	228488977	228493243	ENSG00000168159.12	7.9e-24	+	228488977	228493243	0	2	79,191,	0,4075
chr1	228494030	228494570	ENSG00000168159.12	6.3e-43	+	228494030	228494570	0	1	540,	0
chr1	228743563	228743624	ENSG00000116574.6	0.00091	+	228743563	228743624	0	1	61,	0
chr1	229635089	229636527	ENSG00000135763.10	3.2e-89	+	229635089	229636527	0	1	1438,	0
chr1	229636676	229637006	ENSG00000135763.10	7.9e-19	+	229636676	229637006	0	1	330,	0
chr1	229637125	229637455	ENSG00000135763.10	1.6e-29	+	229637125	229637455	0	1	330,	0
chr1	229637873	229643548	ENSG00000135763.10	2e-61	+	229637873	229643548	0	2	374,16,	0,5659
chr1	229659181	229659422	ENSG00000135763.10	2e-15	+	229659181	229659422	0	1	241,	0
chr1	230067297	230091660	ENSG00000143641.10	1.7e-05	+	230067297	230091660	0	2	109,72,	0,24291
chr1	230274544	230280060	ENSG00000143641.10	1e-284	+	230274544	230280060	0	2	20,758,	0,4758
chr1	230280806	230280867	ENSG00000143641.10	0.0018	+	230280806	230280867	0	1	61,	0
chr1	230693381	230693592	ENSG00000135775.14	1.1e-09	+	230693381	230693592	0	1	211,	0
chr1	231000283	231000524	ENSG00000173409.14	3.2e-23	+	231000283	231000524	0	1	241,	0
chr1	231267830	231269901	ENSG00000116906.13	3.5e-05	+	231267830	231269901	0	2	81,39,	0,2032
chr1	231337103	231337883	ENSG00000010072.16	7.9e-71	+	231337103	231337883	0	1	780,	0
chr1	231694085	231694294	ENSG00000270106.6	1.1e-08	+	231694085	231694294	0	1	209,	0
chr1	231694532	231694712	ENSG00000270106.6	1.3e-06	+	231694532	231694712	0	1	180,	0
chr1	231694071	231694282	ENSG00000162946.22	1.8e-08	+	231694071	231694282	0	1	211,	0
chr1	231694550	231694731	ENSG00000162946.22	3.2e-06	+	231694550	231694731	0	1	181,	0
chr1	232976654	232976865	ENSG00000135778.12	8.3e-06	+	232976654	232976865	0	1	211,	0
chr1	233327723	233328801	ENSG00000143674.11	2e-36	+	233327723	233328801	0	1	1078,	0
chr1	233379172	233382784	ENSG00000143674.11	1e-147	+	233379172	233382784	0	2	538,480,	0,3132
chr1	233666733	233666794	ENSG00000135750.14	0.0054	+	233666733	233666794	0	1	61,	0
chr1	234607007	234609483	ENSG00000228830.1	0	+	234607007	234609483	0	2	630,63,	0,2413
chr1	235328489	235329141	ENSG00000152904.11	6.6e-08	+	235328489	235329141	0	3	9,209,113,	0,80,539
chr1	235329260	235329792	ENSG00000152904.11	2e-15	+	235329260	235329792	0	2	169,72,	0,460
chr1	235342192	235342373	ENSG00000152904.11	6.3e-15	+	235342192	235342373	0	1	181,	0
chr1	235328659	235329080	ENSG00000285053.1	1.4e-09	+	235328659	235329080	0	2	119,122,	0,299
chr1	235329258	235329769	ENSG00000285053.1	1e-138	+	235329258	235329769	0	1	511,	0
chr1	235342180	235342880	ENSG00000285053.1	1e-14	+	235342180	235342880	0	2	166,45,	0,655
chr1	235615475	235615595	ENSG00000227236.2	0.00043	+	235615475	235615595	0	1	120,	0
chr1	235615891	235616070	ENSG00000227236.2	2e-05	+	235615891	235616070	0	1	179,	0
chr1	236482291	236482442	ENSG00000186197.14	1.8e-06	+	236482291	236482442	0	1	151,	0
chr1	236482651	236482861	ENSG00000186197.14	1.6e-14	+	236482651	236482861	0	1	210,	0
chr1	236483250	236483401	ENSG00000186197.14	1.6e-05	+	236483250	236483401	0	1	151,	0
chr1	236483879	236484809	ENSG00000186197.14	1.6e-44	+	236483879	236484809	0	1	930,	0
chr1	236483253	236483402	ENSG00000244457.2	1.6e-05	+	236483253	236483402	0	1	149,	0
chr1	236483815	236484438	ENSG00000244457.2	1.6e-44	+	236483815	236484438	0	1	623,	0
chr1	236542740	236542861	ENSG00000116977.18	1.3e-05	+	236542740	236542861	0	1	121,	0
chr1	236543099	236544861	ENSG00000116977.18	1.3e-40	+	236543099	236544861	0	2	549,112,	0,1650
chr1	236897599	236898290	ENSG00000116984.13	2e-36	+	236897599	236898290	0	1	691,	0
chr1	236899219	236899310	ENSG00000116984.13	7.6e-06	+	236899219	236899310	0	1	91,	0
chr1	236901018	236901199	ENSG00000116984.13	4.5e-06	+	236901018	236901199	0	1	181,	0
chr1	236903477	236903868	ENSG00000116984.13	5e-44	+	236903477	236903868	0	1	391,	0
chr1	236820252	236820400	ENSG00000226498.2	0.0012	+	236820252	236820400	0	1	148,	0
chr1	239907898	239907959	ENSG00000133019.11	0.0045	+	239907898	239907959	0	1	61,	0
chr1	239908377	239908888	ENSG00000133019.11	1.3e-07	+	239908377	239908888	0	1	511,	0
chr1	239909067	239909397	ENSG00000133019.11	5.2e-09	+	239909067	239909397	0	1	330,	0
chr1	240068059	240123302	ENSG00000155816.20	1e-166	+	240068059	240123302	0	3	14,1842,124,	0,23823,55119
chr1	240206838	240206959	ENSG00000155816.20	0.00041	+	240206838	240206959	0	1	121,	0
chr1	240207198	240207378	ENSG00000155816.20	4.5e-05	+	240207198	240207378	0	1	180,	0
chr1	241878826	241879007	ENSG00000174371.17	1.6e-06	+	241878826	241879007	0	1	181,	0
chr1	243164637	243164786	ENSG00000232085.1	6.2e-05	+	243164637	243164786	0	2	29,115,	0,34
chr1	244051406	244055449	ENSG00000179456.10	0	+	244051406	244055449	0	2	38,1662,	0,2381
chr1	244056640	244056880	ENSG00000179456.10	2.5e-51	+	244056640	244056880	0	1	240,	0
chr1	244653730	244653911	ENSG00000121644.19	8.9e-06	+	244653730	244653911	0	1	181,	0
chr1	244705652	244705863	ENSG00000121644.19	6.3e-11	+	244705652	244705863	0	1	211,	0
chr1	245091232	245091443	ENSG00000203666.12	8.7e-05	+	245091232	245091443	0	1	211,	0
chr1	245687361	245687422	ENSG00000162849.16	0.00055	+	245687361	245687422	0	1	61,	0
chr1	245687631	245687782	ENSG00000162849.16	0.00052	+	245687631	245687782	0	1	151,	0
chr1	245702664	245703024	ENSG00000162849.16	0.00021	+	245702664	245703024	0	1	360,	0
chr1	246591644	246591885	ENSG00000162852.14	2.8e-09	+	246591644	246591885	0	1	241,	0
chr1	246647289	246647890	ENSG00000162852.14	1e-12	+	246647289	246647890	0	1	601,	0
chr1	246665748	246665989	ENSG00000162852.14	7.9e-08	+	246665748	246665989	0	1	241,	0
chr1	248847152	248848619	ENSG00000171161.13	2.5e-72	+	248847152	248848619	0	1	1467,	0
chr1	248917611	248917941	ENSG00000185220.12	2.3e-08	+	248917611	248917941	0	1	330,	0
chr1	248918120	248918330	ENSG00000185220.12	1.1e-09	+	248918120	248918330	0	1	210,	0
chr1	916899	918211	ENSG00000223764.2	1.6e-65	-	916899	918211	0	2	821,190,	0,1122
chr1	918886	919692	ENSG00000223764.2	1.6e-49	-	918886	919692	0	2	29,358,	0,448
chr1	944202	944532	ENSG00000188976.11	0	-	944202	944532	0	1	330,	0
chr1	998961	999109	ENSG00000188290.10	1.3e-14	-	998961	999109	0	1	148,	0
chr1	1081817	1083046	ENSG00000131591.17	1e-106	-	1081817	1083046	0	1	1229,	0
chr1	1083165	1083316	ENSG00000131591.17	6.2e-05	-	1083165	1083316	0	1	151,	0
chr1	1083704	1083825	ENSG00000131591.17	0.0006	-	1083704	1083825	0	1	121,	0
chr1	1092603	1092784	ENSG00000131591.17	1.5e-05	-	1092603	1092784	0	1	181,	0
chr1	1216907	1217594	ENSG00000078808.17	1e-112	-	1216907	1217594	0	1	687,	0
chr1	1223924	1228645	ENSG00000078808.17	4e-15	-	1223924	1228645	0	3	44,48,178,	0,3347,4543
chr1	1254862	1255400	ENSG00000160087.20	2.5e-61	-	1254862	1255400	0	1	538,	0
chr1	1311584	1311645	ENSG00000127054.20	0.00076	-	1311584	1311645	0	1	61,	0
chr1	1312415	1316404	ENSG00000127054.20	1e-217	-	1312415	1316404	0	3	1177,1966,248,	0,1316,3741
chr1	1318740	1320001	ENSG00000127054.20	2.5e-99	-	1318740	1320001	0	1	1261,	0
chr1	1320420	1320601	ENSG00000127054.20	1.5e-05	-	1320420	1320601	0	1	181,	0
chr1	1321050	1322798	ENSG00000127054.20	0.00047	-	1321050	1322798	0	3	46,77,28,	0,857,1720
chr1	1317639	1317818	ENSG00000240731.1	7.9e-10	-	1317639	1317818	0	1	179,	0
chr1	1335454	1335634	ENSG00000107404.20	8.7e-06	-	1335454	1335634	0	1	180,	0
chr1	1335902	1336500	ENSG00000107404.20	2.5e-32	-	1335902	1336500	0	1	598,	0
chr1	1342479	1349328	ENSG00000107404.20	1.4e-09	-	1342479	1349328	0	3	5,70,433,	0,209,6416
chr1	1353735	1353796	ENSG00000162576.16	0.003	-	1353735	1353796	0	1	61,	0
chr1	1354413	1354474	ENSG00000162576.16	0.00028	-	1354413	1354474	0	1	61,	0
chr1	1361357	1361657	ENSG00000162576.16	5.5e-08	-	1361357	1361657	0	1	300,	0
chr1	1373729	1374333	ENSG00000175756.13	7.9e-44	-	1373729	1374333	0	2	173,334,	0,270
chr1	1374958	1375257	ENSG00000175756.13	2.5e-25	-	1374958	1375257	0	1	299,	0
chr1	1385860	1386220	ENSG00000221978.12	2.2e-08	-	1385860	1386220	0	1	360,	0
chr1	1386788	1387358	ENSG00000221978.12	1e-236	-	1386788	1387358	0	1	570,	0
chr1	1399184	1399335	ENSG00000221978.12	0.00034	-	1399184	1399335	0	1	151,	0
chr1	1430772	1430832	ENSG00000225285.1	0.0011	-	1430772	1430832	0	1	60,	0
chr1	1434191	1434339	ENSG00000225285.1	0.0017	-	1434191	1434339	0	1	148,	0
chr1	1541672	1541733	ENSG00000160075.12	5.6e-06	-	1541672	1541733	0	1	61,	0
chr1	1544951	1545102	ENSG00000160075.12	2.3e-05	-	1544951	1545102	0	1	151,	0
chr1	1564732	1564793	ENSG00000160075.12	3.7e-06	-	1564732	1564793	0	1	61,	0
chr1	1598011	1598789	ENSG00000228594.4	2.5e-52	-	1598011	1598789	0	1	778,	0
chr1	1598998	1599537	ENSG00000228594.4	1.3e-29	-	1598998	1599537	0	1	539,	0
chr1	1615075	1615735	ENSG00000272106.1	1.9e-09	-	1615075	1615735	0	1	660,	0
chr1	1663082	1663203	ENSG00000189339.11	4.9e-05	-	1663082	1663203	0	1	121,	0
chr1	1663322	1663563	ENSG00000189339.11	2.5e-18	-	1663322	1663563	0	1	241,	0
chr1	1664911	1665871	ENSG00000189339.11	1e-172	-	1664911	1665871	0	1	960,	0
chr1	1690982	1691043	ENSG00000189339.11	0.0019	-	1690982	1691043	0	1	61,	0
chr1	1709551	1716362	ENSG00000008128.23	1e-11	-	1709551	1716362	0	3	89,164,17,	0,2712,6794
chr1	1709563	1716371	ENSG00000268575.1	1.3e-11	-	1709563	1716371	0	3	77,137,26,	0,2700,6782
chr1	1737119	1737210	ENSG00000268575.1	0.0018	-	1737119	1737210	0	1	91,	0
chr1	1729281	1729431	ENSG00000215790.7	0.00044	-	1729281	1729431	0	1	150,	0
chr1	1735581	1738342	ENSG00000215790.7	0.0026	-	1735581	1738342	0	2	39,22,	0,2739
chr1	1890906	1891087	ENSG00000078369.18	4.8e-08	-	1890906	1891087	0	1	181,	0
chr1	1917737	1917975	ENSG00000178821.13	3.2e-23	-	1917737	1917975	0	1	238,	0
chr1	2183646	2183796	ENSG00000182873.5	8.9e-06	-	2183646	2183796	0	1	150,	0
chr1	2184610	2185301	ENSG00000162585.17	7.9e-50	-	2184610	2185301	0	1	691,	0
chr1	2190664	2191174	ENSG00000162585.17	2e-17	-	2190664	2191174	0	1	510,	0
chr1	2191353	2191414	ENSG00000162585.17	0.00091	-	2191353	2191414	0	1	61,	0
chr1	2191923	2192794	ENSG00000162585.17	2.5e-20	-	2191923	2192794	0	1	871,	0
chr1	2332291	2332502	ENSG00000116151.14	0.0019	-	2332291	2332502	0	1	211,	0
chr1	2375819	2375970	ENSG00000116151.14	6.2e-05	-	2375819	2375970	0	1	151,	0
chr1	2376269	2376390	ENSG00000116151.14	2.3e-05	-	2376269	2376390	0	1	121,	0
chr1	2376569	2376750	ENSG00000116151.14	3.3e-06	-	2376569	2376750	0	1	181,	0
chr1	2376929	2377080	ENSG00000116151.14	5.5e-05	-	2376929	2377080	0	1	151,	0
chr1	2377289	2377800	ENSG00000116151.14	5.5e-06	-	2377289	2377800	0	1	511,	0
chr1	2378638	2378849	ENSG00000116151.14	0.0001	-	2378638	2378849	0	1	211,	0
chr1	2385831	2386012	ENSG00000116151.14	0.00044	-	2385831	2386012	0	1	181,	0
chr1	2386131	2386252	ENSG00000116151.14	0.0013	-	2386131	2386252	0	1	121,	0
chr1	2404858	2405634	ENSG00000157911.10	1.3e-11	-	2404858	2405634	0	1	776,	0
chr1	2508530	2508889	ENSG00000157881.14	2e-28	-	2508530	2508889	0	1	359,	0
chr1	3067814	3067875	ENSG00000177133.11	0.0026	-	3067814	3067875	0	1	61,	0
chr1	3067964	3068227	ENSG00000177133.11	0.00068	-	3067964	3068227	0	2	84,6,	0,257
chr1	3489089	3489180	ENSG00000162591.16	0.0013	-	3489089	3489180	0	1	91,	0
chr1	3489628	3489689	ENSG00000162591.16	0.0028	-	3489628	3489689	0	1	61,	0
chr1	3490078	3490169	ENSG00000162591.16	0.0019	-	3490078	3490169	0	1	91,	0
chr1	3735927	3736018	ENSG00000227372.12	0.0003	-	3735927	3736018	0	1	91,	0
chr1	3736257	3736437	ENSG00000227372.12	5e-13	-	3736257	3736437	0	1	180,	0
chr1	3737993	3738353	ENSG00000227372.12	2.5e-19	-	3737993	3738353	0	1	360,	0
chr1	3745576	3745996	ENSG00000227372.12	2e-20	-	3745576	3745996	0	1	420,	0
chr1	3746115	3747014	ENSG00000227372.12	2.5e-87	-	3746115	3747014	0	1	899,	0
chr1	3779036	3779156	ENSG00000130764.10	0.0017	-	3779036	3779156	0	1	120,	0
chr1	3783903	3784167	ENSG00000130764.10	0.00017	-	3783903	3784167	0	2	8,172,	0,92
chr1	3785196	3787230	ENSG00000130764.10	1.6e-16	-	3785196	3787230	0	2	7,382,	0,1652
chr1	3795930	3796020	ENSG00000130764.10	0.0004	-	3795930	3796020	0	1	90,	0
chr1	3796348	3796468	ENSG00000130764.10	9.5e-05	-	3796348	3796468	0	1	120,	0
chr1	3815137	3815348	ENSG00000116198.13	9.1e-05	-	3815137	3815348	0	1	211,	0
chr1	3890634	3890903	ENSG00000198912.11	1.6e-29	-	3890634	3890903	0	1	269,	0
chr1	5874581	5874978	ENSG00000131697.18	0.00016	-	5874581	5874978	0	2	76,105,	0,292
chr1	6248851	6250547	ENSG00000158292.7	3.2e-27	-	6248851	6250547	0	2	1152,108,	0,1588
chr1	6254568	6254628	ENSG00000158292.7	0.00081	-	6254568	6254628	0	1	60,	0
chr1	6260977	6261098	ENSG00000158292.7	0.00043	-	6260977	6261098	0	1	121,	0
chr1	6393494	6393584	ENSG00000097021.19	0.00068	-	6393494	6393584	0	1	90,	0
chr1	6468315	6468466	ENSG00000171680.21	4.7e-05	-	6468315	6468466	0	1	151,	0
chr1	6469129	6469219	ENSG00000171680.21	0.0023	-	6469129	6469219	0	1	90,	0
chr1	6524398	6524758	ENSG00000162408.11	1e-266	-	6524398	6524758	0	1	360,	0
chr1	6592635	6593741	ENSG00000162413.16	1e-118	-	6592635	6593741	0	1	1106,	0
chr1	6595532	6601807	ENSG00000162413.16	1.6e-62	-	6595532	6601807	0	4	25,406,67,11,	0,3514,4217,6264
chr1	6601925	6602733	ENSG00000162413.16	2.5e-50	-	6601925	6602733	0	1	808,	0
chr1	6634466	6635155	ENSG00000007923.16	2.5e-17	-	6634466	6635155	0	1	689,	0
chr1	6635333	6635633	ENSG00000007923.16	1e-152	-	6635333	6635633	0	1	300,	0
chr1	8013212	8013482	ENSG00000116285.13	2e-05	-	8013212	8013482	0	1	270,	0
chr1	8013929	8014198	ENSG00000116285.13	7.9e-08	-	8013929	8014198	0	1	269,	0
chr1	8878248	8878710	ENSG00000074800.16	6.3e-15	-	8878248	8878710	0	2	19,131,	0,331
chr1	9103749	9103900	ENSG00000180758.12	9.8e-05	-	9103749	9103900	0	1	151,	0
chr1	9103989	9104200	ENSG00000180758.12	4.6e-09	-	9103989	9104200	0	1	211,	0
chr1	9729593	9729744	ENSG00000171603.17	1.9e-07	-	9729593	9729744	0	1	151,	0
chr1	9730161	9731177	ENSG00000171603.17	6.3e-14	-	9730161	9731177	0	2	544,56,	0,960
chr1	10461257	10462592	ENSG00000160049.12	5e-90	-	10461257	10462592	0	2	445,125,	0,1210
chr1	10462651	10462982	ENSG00000160049.12	1.6e-84	-	10462651	10462982	0	1	331,	0
chr1	11045735	11046035	ENSG00000009724.16	1.3e-06	-	11045735	11046035	0	1	300,	0
chr1	11046274	11046364	ENSG00000009724.16	0.0045	-	11046274	11046364	0	1	90,	0
chr1	11106954	11107195	ENSG00000198793.12	2.8e-10	-	11106954	11107195	0	1	241,	0
chr1	11788686	11789136	ENSG00000177000.12	6.3e-07	-	11788686	11789136	0	1	450,	0
chr1	11789555	11789616	ENSG00000177000.12	0.00033	-	11789555	11789616	0	1	61,	0
chr1	11790153	11790873	ENSG00000177000.12	2.5e-59	-	11790153	11790873	0	1	720,	0
chr1	11800296	11800417	ENSG00000177000.12	3.5e-05	-	11800296	11800417	0	1	121,	0
chr1	11803077	11803378	ENSG00000177000.12	8.9e-06	-	11803077	11803378	0	1	301,	0
chr1	11805572	11805992	ENSG00000177000.12	1.6e-18	-	11805572	11805992	0	1	420,	0
chr1	11919978	11922178	ENSG00000116685.16	4.4e-09	-	11919978	11922178	0	2	354,4,	0,2196
chr1	11922565	11922924	ENSG00000116685.16	6.3e-35	-	11922565	11922924	0	1	359,	0
chr1	11923072	11926428	ENSG00000116685.16	1e-42	-	11923072	11926428	0	2	417,1224,	0,2132
chr1	12568058	12568208	ENSG00000162496.9	0.00033	-	12568058	12568208	0	1	150,	0
chr1	12618001	12618210	ENSG00000162496.9	7.8e-08	-	12618001	12618210	0	1	209,	0
chr1	15492687	15492867	ENSG00000132906.18	2.1e-05	-	15492687	15492867	0	1	180,	0
chr1	15834771	15836023	ENSG00000179743.4	2e-24	-	15834771	15836023	0	1	1252,	0
chr1	15941958	15942168	ENSG00000116809.11	3.3e-05	-	15941958	15942168	0	1	210,	0
chr1	15944383	15944533	ENSG00000116809.11	1.2e-06	-	15944383	15944533	0	1	150,	0
chr1	15946193	15946991	ENSG00000116809.11	0.0001	-	15946193	15946991	0	2	123,57,	0,741
chr1	16148413	16148473	ENSG00000142627.13	0.00055	-	16148413	16148473	0	1	60,	0
chr1	16148740	16148890	ENSG00000142627.13	1.5e-06	-	16148740	16148890	0	1	150,	0
chr1	16225281	16225341	ENSG00000237276.8	0.0017	-	16225281	16225341	0	1	60,	0
chr1	16231691	16232922	ENSG00000132881.12	5e-26	-	16231691	16232922	0	3	606,137,30,	0,818,1201
chr1	16236974	16237183	ENSG00000132881.12	1.5e-06	-	16236974	16237183	0	1	209,	0
chr1	16250610	16251030	ENSG00000037637.11	6.3e-85	-	16250610	16251030	0	1	420,	0
chr1	16251089	16251389	ENSG00000037637.11	1e-23	-	16251089	16251389	0	1	300,	0
chr1	16607529	16607589	ENSG00000219481.10	0.00091	-	16607529	16607589	0	1	60,	0
chr1	16613471	16613562	ENSG00000219481.10	0.00059	-	16613471	16613562	0	1	91,	0
chr1	17068860	17069011	ENSG00000117115.13	6.2e-05	-	17068860	17069011	0	1	151,	0
chr1	17407838	17408476	ENSG00000179051.14	1e-114	-	17407838	17408476	0	1	638,	0
chr1	18956135	18956286	ENSG00000169991.11	3.5e-05	-	18956135	18956286	0	1	151,	0
chr1	18956405	18956466	ENSG00000169991.11	0.0078	-	18956405	18956466	0	1	61,	0
chr1	19219069	19219429	ENSG00000127463.15	1e-110	-	19219069	19219429	0	1	360,	0
chr1	19682897	19683107	ENSG00000162542.13	1.4e-05	-	19682897	19683107	0	1	210,	0
chr1	20483497	20483648	ENSG00000162545.6	6.5e-06	-	20483497	20483648	0	1	151,	0
chr1	20499866	20500676	ENSG00000090432.7	1e-101	-	20499866	20500676	0	1	810,	0
chr1	20500945	20501276	ENSG00000090432.7	5e-55	-	20500945	20501276	0	1	331,	0
chr1	20648436	20648914	ENSG00000117242.7	4e-30	-	20648436	20648914	0	1	478,	0
chr1	20650701	20651060	ENSG00000117242.7	3.2e-20	-	20650701	20651060	0	1	359,	0
chr1	20664125	20664422	ENSG00000117245.12	0.0028	-	20664125	20664422	0	2	79,35,	0,262
chr1	20720119	20720269	ENSG00000189410.12	4.1e-05	-	20720119	20720269	0	1	150,	0
chr1	20720358	20720718	ENSG00000189410.12	2e-13	-	20720358	20720718	0	1	360,	0
chr1	20721315	20721406	ENSG00000189410.12	6.9e-05	-	20721315	20721406	0	1	91,	0
chr1	20941504	20941925	ENSG00000075151.20	1.1e-09	-	20941504	20941925	0	1	421,	0
chr1	21217845	21218385	ENSG00000117298.16	1.6e-38	-	21217845	21218385	0	1	540,	0
chr1	21219013	21219253	ENSG00000117298.16	3.2e-24	-	21219013	21219253	0	1	240,	0
chr1	21219612	21221857	ENSG00000117298.16	2.5e-29	-	21219612	21221857	0	2	519,111,	0,2134
chr1	21279251	21279372	ENSG00000117298.16	7.9e-05	-	21279251	21279372	0	1	121,	0
chr1	22030332	22030751	ENSG00000285752.1	2e-40	-	22030332	22030751	0	1	419,	0
chr1	23088611	23090464	ENSG00000169641.13	3.2e-38	-	23088611	23090464	0	2	442,38,	0,1815
chr1	23091264	23091445	ENSG00000169641.13	7.2e-08	-	23091264	23091445	0	1	181,	0
chr1	23091834	23091925	ENSG00000169641.13	0.00056	-	23091834	23091925	0	1	91,	0
chr1	23092614	23092855	ENSG00000169641.13	3.2e-12	-	23092614	23092855	0	1	241,	0
chr1	23093813	23093904	ENSG00000169641.13	0.00091	-	23093813	23093904	0	1	91,	0
chr1	23310483	23310813	ENSG00000125944.20	4e-54	-	23310483	23310813	0	1	330,	0
chr1	23361481	23361781	ENSG00000125945.15	2e-11	-	23361481	23361781	0	1	300,	0
chr1	23362677	23362857	ENSG00000125945.15	1.3e-06	-	23362677	23362857	0	1	180,	0
chr1	23509630	23510138	ENSG00000007968.7	1e-128	-	23509630	23510138	0	1	508,	0
chr1	23558284	23558345	ENSG00000117318.9	0.00098	-	23558284	23558345	0	1	61,	0
chr1	23802213	23802304	ENSG00000117305.15	0.0015	-	23802213	23802304	0	1	91,	0
chr1	23845491	23845581	ENSG00000179163.11	0.00033	-	23845491	23845581	0	1	90,	0
chr1	24156681	24156862	ENSG00000185436.12	3e-05	-	24156681	24156862	0	1	181,	0
chr1	24157011	24157850	ENSG00000185436.12	1.6e-30	-	24157011	24157850	0	1	839,	0
chr1	24357657	24357958	ENSG00000001460.18	0.00014	-	24357657	24357958	0	1	301,	0
chr1	24358077	24358527	ENSG00000001460.18	3.2e-50	-	24358077	24358527	0	1	450,	0
chr1	24391292	24391473	ENSG00000001460.18	8.7e-06	-	24391292	24391473	0	1	181,	0
chr1	24901726	24901787	ENSG00000020633.18	0.0011	-	24901726	24901787	0	1	61,	0
chr1	24902026	24902176	ENSG00000020633.18	0.00036	-	24902026	24902176	0	1	150,	0
chr1	25253702	25253823	ENSG00000117616.18	0.00026	-	25253702	25253823	0	1	121,	0
chr1	25835067	25835662	ENSG00000127423.10	1e-15	-	25835067	25835662	0	1	595,	0
chr1	25862707	25863068	ENSG00000182749.5	5e-20	-	25862707	25863068	0	1	361,	0
chr1	25863366	25863757	ENSG00000182749.5	2.5e-21	-	25863366	25863757	0	1	391,	0
chr1	25961529	25961948	ENSG00000158006.14	2.5e-52	-	25961529	25961948	0	1	419,	0
chr1	26169870	26170226	ENSG00000236782.7	1e-09	-	26169870	26170226	0	1	356,	0
chr1	26170581	26170996	ENSG00000236782.7	0	-	26170581	26170996	0	1	415,	0
chr1	26889004	26890074	ENSG00000142751.15	7.9e-33	-	26889004	26890074	0	2	121,389,	0,681
chr1	26890487	26890755	ENSG00000198746.13	1e-21	-	26890487	26890755	0	1	268,	0
chr1	26894272	26897608	ENSG00000198746.13	1e-125	-	26894272	26897608	0	2	138,308,	0,3028
chr1	27005733	27006121	ENSG00000158246.8	7.9e-20	-	27005733	27006121	0	1	388,	0
chr1	27006418	27006806	ENSG00000158246.8	2e-12	-	27006418	27006806	0	1	388,	0
chr1	27534903	27550362	ENSG00000126705.14	1e-142	-	27534903	27550362	0	2	13,3102,	0,12357
chr1	27550481	27552039	ENSG00000126705.14	1.3e-47	-	27550481	27552039	0	1	1558,	0
chr1	27603617	27604221	ENSG00000126705.14	2e-21	-	27603617	27604221	0	2	16,494,	0,110
chr1	28149641	28149881	ENSG00000169403.12	6.5e-08	-	28149641	28149881	0	1	240,	0
chr1	28230241	28233029	ENSG00000126698.11	6.3e-15	-	28230241	28233029	0	2	11,109,	0,2679
chr1	28870658	28870805	ENSG00000233427.1	3.5e-06	-	28870658	28870805	0	1	147,	0
chr1	29119578	29119728	ENSG00000253304.2	6.6e-05	-	29119578	29119728	0	1	150,	0
chr1	29120955	29121136	ENSG00000253304.2	0.0001	-	29120955	29121136	0	1	181,	0
chr1	29148251	29148432	ENSG00000116350.17	1.6e-13	-	29148251	29148432	0	1	181,	0
chr1	29148700	29149151	ENSG00000116350.17	5e-38	-	29148700	29149151	0	1	451,	0
chr1	29193291	29193621	ENSG00000116353.15	2e-31	-	29193291	29193621	0	1	330,	0
chr1	30718948	30719128	ENSG00000162510.6	9.1e-06	-	30718948	30719128	0	1	180,	0
chr1	30869884	30870065	ENSG00000162512.16	7.1e-06	-	30869884	30870065	0	1	181,	0
chr1	30870243	30870334	ENSG00000162512.16	0.00043	-	30870243	30870334	0	1	91,	0
chr1	30870782	30870963	ENSG00000162512.16	2.4e-05	-	30870782	30870963	0	1	181,	0
chr1	30872668	30876838	ENSG00000162512.16	3.2e-99	-	30872668	30876838	0	3	709,292,287,	0,1628,3883
chr1	31059243	31059424	ENSG00000134644.15	1e-10	-	31059243	31059424	0	1	181,	0
chr1	31061902	31065781	ENSG00000134644.15	5.5e-09	-	31061902	31065781	0	2	14,166,	0,3713
chr1	31181412	31181588	ENSG00000084628.10	2.2e-05	-	31181412	31181588	0	1	176,	0
chr1	31630339	31630636	ENSG00000162517.13	1e-47	-	31630339	31630636	0	1	297,	0
chr1	31727116	31727566	ENSG00000121753.12	3.2e-59	-	31727116	31727566	0	1	450,	0
chr1	31730807	31731257	ENSG00000121753.12	1.6e-20	-	31730807	31731257	0	1	450,	0
chr1	31756317	31756737	ENSG00000121753.12	5e-26	-	31756317	31756737	0	1	420,	0
chr1	31937860	31942571	ENSG00000184007.21	1.6e-37	-	31937860	31942571	0	3	26,382,43,	0,126,4668
chr1	32214530	32214889	ENSG00000160055.19	1.5e-06	-	32214530	32214889	0	1	359,	0
chr1	32216312	32216789	ENSG00000160055.19	3.2e-85	-	32216312	32216789	0	1	477,	0
chr1	32334403	32334701	ENSG00000175130.7	0	-	32334403	32334701	0	1	298,	0
chr1	32334937	32335966	ENSG00000175130.7	3.2e-27	-	32334937	32335966	0	2	160,20,	0,1009
chr1	32362451	32362691	ENSG00000225828.1	1.5e-08	-	32362451	32362691	0	1	240,	0
chr1	32363529	32363769	ENSG00000225828.1	5e-19	-	32363529	32363769	0	1	240,	0
chr1	32366505	32366745	ENSG00000160058.18	5e-11	-	32366505	32366745	0	1	240,	0
chr1	32368446	32369335	ENSG00000160058.18	1.6e-13	-	32368446	32369335	0	2	104,106,	0,783
chr1	32374748	32376556	ENSG00000160058.18	2e-74	-	32374748	32376556	0	2	34,295,	0,1513
chr1	32775745	32775956	ENSG00000134684.10	1e-140	-	32775745	32775956	0	1	211,	0
chr1	32811623	32817344	ENSG00000134684.10	7.9e-12	-	32811623	32817344	0	2	24,157,	0,5564
chr1	32936744	32937225	ENSG00000116514.16	7.9e-41	-	32936744	32937225	0	1	481,	0
chr1	32964294	32964355	ENSG00000116514.16	0.00049	-	32964294	32964355	0	1	61,	0
chr1	33008029	33008809	ENSG00000004455.16	1e-158	-	33008029	33008809	0	1	780,	0
chr1	33036760	33036971	ENSG00000004455.16	2.2e-08	-	33036760	33036971	0	1	211,	0
chr1	33324221	33324342	ENSG00000134686.18	1.3e-06	-	33324221	33324342	0	1	121,	0
chr1	33324671	33324971	ENSG00000134686.18	4e-67	-	33324671	33324971	0	1	300,	0
chr1	33349757	33349877	ENSG00000134686.18	0.00014	-	33349757	33349877	0	1	120,	0
chr1	34855294	34855924	ENSG00000163866.9	1e-134	-	34855294	34855924	0	1	630,	0
chr1	34987364	34987605	ENSG00000163867.17	3.5e-06	-	34987364	34987605	0	1	241,	0
chr1	35192546	35192816	ENSG00000116560.11	1.3e-20	-	35192546	35192816	0	1	270,	0
chr1	35359107	35365991	ENSG00000227409.1	0.00024	-	35359107	35365991	0	2	61,26,	0,6858
chr1	35433791	35433971	ENSG00000142687.18	2.9e-07	-	35433791	35433971	0	1	180,	0
chr1	35506743	35507103	ENSG00000142687.18	4e-20	-	35506743	35507103	0	1	360,	0
chr1	35557739	35557950	ENSG00000142687.18	4e-14	-	35557739	35557950	0	1	211,	0
chr1	35714593	35714863	ENSG00000142686.8	7.9e-51	-	35714593	35714863	0	1	270,	0
chr1	35715759	35716621	ENSG00000142686.8	1e-59	-	35715759	35716621	0	2	567,121,	0,741
chr1	35718714	35718894	ENSG00000142686.8	1.1e-06	-	35718714	35718894	0	1	180,	0
chr1	35720696	35720937	ENSG00000092853.14	6.3e-32	-	35720696	35720937	0	1	241,	0
chr1	35753914	35760769	ENSG00000092853.14	1.3e-57	-	35753914	35760769	0	2	22,428,	0,6427
chr1	35764355	35764535	ENSG00000092853.14	1.3e-07	-	35764355	35764535	0	1	180,	0
chr1	36136718	36136869	ENSG00000054116.12	1e-11	-	36136718	36136869	0	1	151,	0
chr1	36136987	36137227	ENSG00000054116.12	2.5e-46	-	36136987	36137227	0	1	240,	0
chr1	36149325	36149506	ENSG00000054116.12	3.6e-06	-	36149325	36149506	0	1	181,	0
chr1	36322030	36323918	ENSG00000142694.6	4e-95	-	36322030	36323918	0	4	695,97,157,26,	0,940,1428,1862
chr1	36341566	36341716	ENSG00000196182.10	1.9e-06	-	36341566	36341716	0	1	150,	0
chr1	36372768	36385896	ENSG00000196182.10	2e-16	-	36372768	36385896	0	2	6,174,	0,12954
chr1	36393705	36397642	ENSG00000181817.6	6.3e-94	-	36393705	36397642	0	2	448,25,	0,3912
chr1	36397789	36397908	ENSG00000181817.6	0.0046	-	36397789	36397908	0	1	119,	0
chr1	36455717	36455867	ENSG00000116898.12	5e-38	-	36455717	36455867	0	1	150,	0
chr1	37455047	37455197	ENSG00000233621.2	0.00052	-	37455047	37455197	0	1	150,	0
chr1	37455346	37455496	ENSG00000233621.2	8.7e-05	-	37455346	37455496	0	1	150,	0
chr1	37455674	37455765	ENSG00000233621.2	0.0017	-	37455674	37455765	0	1	91,	0
chr1	37537651	37538011	ENSG00000163877.11	1.6e-33	-	37537651	37538011	0	1	360,	0
chr1	37540333	37540724	ENSG00000163877.11	7.9e-26	-	37540333	37540724	0	1	391,	0
chr1	37682917	37683068	ENSG00000116922.14	7.2e-07	-	37682917	37683068	0	1	151,	0
chr1	37690348	37691056	ENSG00000116922.14	2.8e-06	-	37690348	37691056	0	2	172,9,	0,699
chr1	37799719	37800704	ENSG00000233728.1	7.9e-74	-	37799719	37800704	0	2	450,75,	0,910
chr1	37808118	37808208	ENSG00000196449.4	0.00014	-	37808118	37808208	0	1	90,	0
chr1	37815108	37815408	ENSG00000188786.10	4e-28	-	37815108	37815408	0	1	300,	0
chr1	37822196	37822526	ENSG00000188786.10	6.3e-14	-	37822196	37822526	0	1	330,	0
chr1	37857373	37859562	ENSG00000188786.10	5e-15	-	37857373	37859562	0	3	336,52,32,	0,1114,2157
chr1	37997217	37997398	ENSG00000183386.10	1.4e-05	-	37997217	37997398	0	1	181,	0
chr1	38045059	38046405	ENSG00000185668.7	1e-12	-	38045059	38046405	0	1	1346,	0
chr1	38046643	38046704	ENSG00000185668.7	0.0037	-	38046643	38046704	0	1	61,	0
chr1	38838586	38838707	ENSG00000116954.8	4.3e-05	-	38838586	38838707	0	1	121,	0
chr1	38838945	38839215	ENSG00000116954.8	1e-18	-	38838945	38839215	0	1	270,	0
chr1	38839364	38839484	ENSG00000116954.8	3e-05	-	38839364	38839484	0	1	120,	0
chr1	38839332	38839482	ENSG00000273637.1	5.4e-07	-	38839332	38839482	0	1	150,	0
chr1	38873117	38873207	ENSG00000214114.9	6e-05	-	38873117	38873207	0	1	90,	0
chr1	39524188	39524249	ENSG00000243970.3	0.0017	-	39524188	39524249	0	1	61,	0
chr1	39524667	39524817	ENSG00000243970.3	8.9e-06	-	39524667	39524817	0	1	150,	0
chr1	39524996	39525206	ENSG00000243970.3	0.00016	-	39524996	39525206	0	1	210,	0
chr1	39525325	39525505	ENSG00000243970.3	6.2e-06	-	39525325	39525505	0	1	180,	0
chr1	39525564	39525625	ENSG00000243970.3	0.0012	-	39525564	39525625	0	1	61,	0
chr1	39559283	39559641	ENSG00000243970.3	0.00016	-	39559283	39559641	0	2	83,8,	0,350
chr1	39624603	39624694	ENSG00000163909.8	2e-05	-	39624603	39624694	0	1	91,	0
chr1	39624873	39624993	ENSG00000163909.8	7.8e-07	-	39624873	39624993	0	1	120,	0
chr1	39625232	39626282	ENSG00000163909.8	2e-36	-	39625232	39626282	0	1	1050,	0
chr1	39760178	39760539	ENSG00000116985.12	3.5e-05	-	39760178	39760539	0	1	361,	0
chr1	39769612	39769942	ENSG00000198754.5	2.5e-17	-	39769612	39769942	0	1	330,	0
chr1	39770270	39770391	ENSG00000198754.5	0.0017	-	39770270	39770391	0	1	121,	0
chr1	39771078	39771348	ENSG00000198754.5	2.8e-07	-	39771078	39771348	0	1	270,	0
chr1	39895754	39896564	ENSG00000116990.11	2.5e-14	-	39895754	39896564	0	1	810,	0
chr1	39896773	39897523	ENSG00000116990.11	3.2e-15	-	39896773	39897523	0	1	750,	0
chr1	39901289	39901650	ENSG00000116990.11	5.2e-07	-	39901289	39901650	0	1	361,	0
chr1	40257611	40257878	ENSG00000259943.1	2.5e-23	-	40257611	40257878	0	1	267,	0
chr1	40514632	40515000	ENSG00000227278.1	3.1e-07	-	40514632	40515000	0	2	2,201,	0,167
chr1	40861229	40861858	ENSG00000179862.6	1.3e-17	-	40861229	40861858	0	1	629,	0
chr1	41510470	41510950	ENSG00000127124.16	7.9e-31	-	41510470	41510950	0	1	480,	0
chr1	41512918	41513308	ENSG00000127124.16	3.2e-09	-	41512918	41513308	0	1	390,	0
chr1	41513427	41524745	ENSG00000127124.16	1.3e-11	-	41513427	41524745	0	3	323,87,11,	0,4974,11307
chr1	41628847	41628938	ENSG00000127124.16	0.0013	-	41628847	41628938	0	1	91,	0
chr1	42335442	42335558	ENSG00000227527.2	0.0017	-	42335442	42335558	0	1	116,	0
chr1	42746364	42746724	ENSG00000117385.15	6.3e-32	-	42746364	42746724	0	1	360,	0
chr1	42807257	42807317	ENSG00000177868.12	0.0006	-	42807257	42807317	0	1	60,	0
chr1	42834139	42834649	ENSG00000228192.8	1e-12	-	42834139	42834649	0	1	510,	0
chr1	42834708	42834949	ENSG00000228192.8	6.3e-14	-	42834708	42834949	0	1	241,	0
chr1	42926510	42926900	ENSG00000117394.22	6.3e-52	-	42926510	42926900	0	1	390,	0
chr1	42958727	42958847	ENSG00000117394.22	0.00033	-	42958727	42958847	0	1	120,	0
chr1	43363695	43363905	ENSG00000066322.15	3.2e-14	-	43363695	43363905	0	1	210,	0
chr1	43366566	43367352	ENSG00000066322.15	0.0017	-	43366566	43367352	0	3	21,54,16,	0,484,770
chr1	43451002	43451211	ENSG00000178922.16	6.3e-15	-	43451002	43451211	0	1	209,	0
chr1	43704489	43707131	ENSG00000236200.6	7.9e-86	-	43704489	43707131	0	2	257,73,	0,2569
chr1	43939565	43939625	ENSG00000237950.2	0.0017	-	43939565	43939625	0	1	60,	0
chr1	43997428	43997904	ENSG00000196517.11	5e-17	-	43997428	43997904	0	2	311,50,	0,426
chr1	44654254	44654345	ENSG00000126106.14	0.00068	-	44654254	44654345	0	1	91,	0
chr1	44654494	44654734	ENSG00000126106.14	4.1e-07	-	44654494	44654734	0	1	240,	0
chr1	45017742	45017833	ENSG00000162415.7	0.0026	-	45017742	45017833	0	1	91,	0
chr1	45018071	45018460	ENSG00000162415.7	1.6e-19	-	45018071	45018460	0	1	389,	0
chr1	45018609	45018878	ENSG00000162415.7	7.9e-21	-	45018609	45018878	0	1	269,	0
chr1	45088088	45088149	ENSG00000162415.7	0.00034	-	45088088	45088149	0	1	61,	0
chr1	45206054	45303944	ENSG00000162415.7	2.5e-19	-	45206054	45303944	0	2	551,18,	0,97872
chr1	45651738	45651797	ENSG00000234329.1	0.00081	-	45651738	45651797	0	1	59,	0
chr1	46043403	46043583	ENSG00000117461.15	4.5e-09	-	46043403	46043583	0	1	180,	0
chr1	46188681	46188921	ENSG00000085998.14	2.5e-31	-	46188681	46188921	0	1	240,	0
chr1	46197893	46197984	ENSG00000085998.14	5.2e-06	-	46197893	46197984	0	1	91,	0
chr1	46198346	46220156	ENSG00000085998.14	5e-43	-	46198346	46220156	0	2	88,452,	0,21358
chr1	46285365	46285966	ENSG00000132128.16	6.3e-56	-	46285365	46285966	0	1	601,	0
chr1	46286144	46286355	ENSG00000132128.16	3.7e-08	-	46286144	46286355	0	1	211,	0
chr1	46303157	46303278	ENSG00000132128.16	0.0019	-	46303157	46303278	0	1	121,	0
chr1	47219768	47219979	ENSG00000162367.11	0.00016	-	47219768	47219979	0	1	211,	0
chr1	47251333	47251693	ENSG00000123473.15	1.1e-08	-	47251333	47251693	0	1	360,	0
chr1	47272193	47280462	ENSG00000123473.15	1e-31	-	47272193	47280462	0	2	48,222,	0,8047
chr1	47432431	47433088	ENSG00000237424.1	5e-29	-	47432431	47433088	0	1	657,	0
chr1	47433296	47434133	ENSG00000237424.1	6.3e-55	-	47433296	47434133	0	1	837,	0
chr1	47434312	47434641	ENSG00000237424.1	6.3e-16	-	47434312	47434641	0	1	329,	0
chr1	47765562	47765623	ENSG00000269113.4	0.00043	-	47765562	47765623	0	1	61,	0
chr1	47766072	47775226	ENSG00000269113.4	0.00043	-	47766072	47775226	0	2	34,57,	0,9097
chr1	47994215	47994576	ENSG00000269113.4	2.5e-11	-	47994215	47994576	0	1	361,	0
chr1	51878013	51878757	ENSG00000078618.21	2e-65	-	51878013	51878757	0	2	27,483,	0,261
chr1	52030521	52033526	ENSG00000117862.12	1.8e-10	-	52030521	52033526	0	2	27,242,	0,2763
chr1	52055515	52055575	ENSG00000117862.12	0.00052	-	52055515	52055575	0	1	60,	0
chr1	52032756	52032906	ENSG00000285839.1	8.3e-05	-	52032756	52032906	0	1	150,	0
chr1	52032964	52033350	ENSG00000285839.1	1.3e-12	-	52032964	52033350	0	1	386,	0
chr1	52032191	52032694	ENSG00000198841.3	5e-46	-	52032191	52032694	0	1	503,	0
chr1	52032752	52032900	ENSG00000198841.3	0.00012	-	52032752	52032900	0	1	148,	0
chr1	52032988	52033550	ENSG00000198841.3	7.9e-21	-	52032988	52033550	0	1	562,	0
chr1	52352599	52352930	ENSG00000154222.14	1.6e-16	-	52352599	52352930	0	1	331,	0
chr1	52361488	52361549	ENSG00000154222.14	0.00074	-	52361488	52361549	0	1	61,	0
chr1	52393488	52393726	ENSG00000085840.13	2.5e-15	-	52393488	52393726	0	1	238,	0
chr1	52475073	52475343	ENSG00000134744.14	6.3e-32	-	52475073	52475343	0	1	270,	0
chr1	52687521	52692826	ENSG00000162377.6	1e-190	-	52687521	52692826	0	2	647,100,	0,5205
chr1	52897528	52897829	ENSG00000121310.17	4e-28	-	52897528	52897829	0	1	301,	0
chr1	53210111	53210172	ENSG00000236723.2	0.0013	-	53210111	53210172	0	1	61,	0
chr1	53214187	53214308	ENSG00000162384.14	8.1e-06	-	53214187	53214308	0	1	121,	0
chr1	53214486	53214725	ENSG00000162384.14	2.5e-21	-	53214486	53214725	0	1	239,	0
chr1	53220514	53220604	ENSG00000162384.14	0.00036	-	53220514	53220604	0	1	90,	0
chr1	53594243	53594603	ENSG00000174332.5	5.5e-05	-	53594243	53594603	0	1	360,	0
chr1	53767807	53767927	ENSG00000058804.12	0.00059	-	53767807	53767927	0	1	120,	0
chr1	53851748	53851928	ENSG00000058799.15	2e-07	-	53851748	53851928	0	1	180,	0
chr1	54053203	54053384	ENSG00000116209.11	1.2e-07	-	54053203	54053384	0	1	181,	0
chr1	54173424	54173634	ENSG00000215883.10	9.8e-10	-	54173424	54173634	0	1	210,	0
chr1	54174023	54174293	ENSG00000215883.10	5e-13	-	54174023	54174293	0	1	270,	0
chr1	54174412	54174802	ENSG00000215883.10	2.5e-33	-	54174412	54174802	0	1	390,	0
chr1	54225789	54226029	ENSG00000157216.15	6.3e-59	-	54225789	54226029	0	1	240,	0
chr1	54226148	54226507	ENSG00000157216.15	4e-20	-	54226148	54226507	0	1	359,	0
chr1	54405989	54412726	ENSG00000157216.15	2.5e-30	-	54405989	54412726	0	2	430,19,	0,6718
chr1	54609599	54609839	ENSG00000162391.12	0.00034	-	54609599	54609839	0	1	240,	0
chr1	54757642	54758061	ENSG00000162396.6	4e-32	-	54757642	54758061	0	1	419,	0
chr1	54758149	54758865	ENSG00000162396.6	1.3e-74	-	54758149	54758865	0	1	716,	0
chr1	54850701	54850882	ENSG00000116133.13	1e-17	-	54850701	54850882	0	1	181,	0
chr1	54850970	54851031	ENSG00000116133.13	4.6e-05	-	54850970	54851031	0	1	61,	0
chr1	54851120	54851539	ENSG00000116133.13	4e-93	-	54851120	54851539	0	1	419,	0
chr1	54851597	54851688	ENSG00000116133.13	2.3e-05	-	54851597	54851688	0	1	91,	0
chr1	54851896	54852345	ENSG00000116133.13	1e-118	-	54851896	54852345	0	1	449,	0
chr1	55066508	55066689	ENSG00000162402.14	1e-18	-	55066508	55066689	0	1	181,	0
chr1	55067317	55067468	ENSG00000162402.14	6.5e-06	-	55067317	55067468	0	1	151,	0
chr1	55068636	55069027	ENSG00000162402.14	1e-71	-	55068636	55069027	0	1	391,	0
chr1	55214853	55215124	ENSG00000162402.14	0.00011	-	55214853	55215124	0	1	271,	0
chr1	56579225	56579316	ENSG00000162407.9	0.00059	-	56579225	56579316	0	1	91,	0
chr1	58539059	58539120	ENSG00000162600.12	0.00015	-	58539059	58539120	0	1	61,	0
chr1	58682016	58682227	ENSG00000162601.11	1.3e-14	-	58682016	58682227	0	1	211,	0
chr1	58780997	58781148	ENSG00000177606.6	7.9e-15	-	58780997	58781148	0	1	151,	0
chr1	58781507	58784117	ENSG00000177606.6	0	-	58781507	58784117	0	1	2610,	0
chr1	63324381	63324441	ENSG00000230798.5	0.003	-	63324381	63324441	0	1	60,	0
chr1	67412966	67415318	ENSG00000142864.14	0	-	67412966	67415318	0	2	297,153,	0,2199
chr1	68126035	68126186	ENSG00000116729.14	0.00014	-	68126035	68126186	0	1	151,	0
chr1	68232373	68232697	ENSG00000116729.14	1.1e-06	-	68232373	68232697	0	2	172,38,	0,286
chr1	68162144	68162293	ENSG00000234383.1	9.8e-07	-	68162144	68162293	0	1	149,	0
chr1	70354016	70354435	ENSG00000118454.13	6.3e-13	-	70354016	70354435	0	1	419,	0
chr1	70354643	70354734	ENSG00000118454.13	0.0025	-	70354643	70354734	0	1	91,	0
chr1	77632040	77632580	ENSG00000036549.13	5e-11	-	77632040	77632580	0	1	540,	0
chr1	77632788	77632969	ENSG00000036549.13	4.1e-09	-	77632788	77632969	0	1	181,	0
chr1	77888595	77888656	ENSG00000235927.4	0.0014	-	77888595	77888656	0	1	61,	0
chr1	77888714	77888775	ENSG00000235927.4	0.00078	-	77888714	77888775	0	1	61,	0
chr1	77889041	77889191	ENSG00000235927.4	7.2e-06	-	77889041	77889191	0	1	150,	0
chr1	77970000	77979020	ENSG00000162613.16	9.5e-06	-	77970000	77979020	0	2	15,136,	0,8884
chr1	84865660	84866140	ENSG00000171517.6	3.2e-58	-	84865660	84866140	0	1	480,	0
chr1	85158833	85159163	ENSG00000097096.9	3.3e-07	-	85158833	85159163	0	1	330,	0
chr1	85182086	85182447	ENSG00000097096.9	6.3e-12	-	85182086	85182447	0	1	361,	0
chr1	85182685	85183015	ENSG00000097096.9	8.7e-06	-	85182685	85183015	0	1	330,	0
chr1	85190139	85190260	ENSG00000097096.9	0.00063	-	85190139	85190260	0	1	121,	0
chr1	85190439	85190529	ENSG00000097096.9	0.00034	-	85190439	85190529	0	1	90,	0
chr1	85200476	85201016	ENSG00000097096.9	1.6e-18	-	85200476	85201016	0	1	540,	0
chr1	85267603	85267754	ENSG00000142867.14	1.3e-07	-	85267603	85267754	0	1	151,	0
chr1	85707773	85708253	ENSG00000117174.11	5e-25	-	85707773	85708253	0	1	480,	0
chr1	86350415	86350626	ENSG00000122417.15	8.5e-07	-	86350415	86350626	0	1	211,	0
chr1	86914037	86914186	ENSG00000183291.17	0.0024	-	86914037	86914186	0	1	149,	0
chr1	88982537	88982747	ENSG00000213516.10	5e-16	-	88982537	88982747	0	1	210,	0
chr1	88982985	88983046	ENSG00000213516.10	0.0022	-	88982985	88983046	0	1	61,	0
chr1	88983314	88983704	ENSG00000213516.10	1.6e-12	-	88983314	88983704	0	1	390,	0
chr1	89582727	89582907	ENSG00000231999.7	4.5e-05	-	89582727	89582907	0	1	180,	0
chr1	89820491	89820637	ENSG00000272931.1	5.5e-05	-	89820491	89820637	0	1	146,	0
chr1	89820780	89820868	ENSG00000272931.1	5.5e-05	-	89820780	89820868	0	1	88,	0
chr1	89993621	89993972	ENSG00000228175.3	4.6e-10	-	89993621	89993972	0	1	351,	0
chr1	90712367	90712427	ENSG00000143032.8	0.0028	-	90712367	90712427	0	1	60,	0
chr1	90783000	90783211	ENSG00000233593.10	1.7e-09	-	90783000	90783211	0	1	211,	0
chr1	90937665	90937786	ENSG00000122482.21	5.4e-05	-	90937665	90937786	0	1	121,	0
chr1	90939552	90939762	ENSG00000122482.21	6.3e-12	-	90939552	90939762	0	1	210,	0
chr1	92475381	92475472	ENSG00000162676.12	0.00081	-	92475381	92475472	0	1	91,	0
chr1	92475711	92475862	ENSG00000162676.12	5.2e-07	-	92475711	92475862	0	1	151,	0
chr1	92513702	92513763	ENSG00000067208.14	0.003	-	92513702	92513763	0	1	61,	0
chr1	92843049	92843229	ENSG00000154511.12	0.00026	-	92843049	92843229	0	1	180,	0
chr1	92843555	92843764	ENSG00000154511.12	5.2e-09	-	92843555	92843764	0	1	209,	0
chr1	93180365	93180516	ENSG00000117500.13	9.5e-08	-	93180365	93180516	0	1	151,	0
chr1	93582409	93582799	ENSG00000137936.18	1.9e-07	-	93582409	93582799	0	1	390,	0
chr1	93681677	93681827	ENSG00000137936.18	0.00043	-	93681677	93681827	0	1	150,	0
chr1	93876707	93876978	ENSG00000067334.14	1.6e-11	-	93876707	93876978	0	1	271,	0
chr1	94173869	94174619	ENSG00000137962.13	1.3e-19	-	94173869	94174619	0	1	750,	0
chr1	99969477	99969537	ENSG00000228084.1	0.0028	-	99969477	99969537	0	1	60,	0
chr1	100258425	100258606	ENSG00000224616.3	1.4e-05	-	100258425	100258606	0	1	181,	0
chr1	100874078	100874229	ENSG00000162694.14	7.8e-05	-	100874078	100874229	0	1	151,	0
chr1	100990372	100990523	ENSG00000117543.21	1.8e-08	-	100990372	100990523	0	1	151,	0
chr1	108929806	108929927	ENSG00000121940.15	3.5e-07	-	108929806	108929927	0	1	121,	0
chr1	108971348	108971529	ENSG00000085433.15	2e-07	-	108971348	108971529	0	1	181,	0
chr1	109089488	109089757	ENSG00000273382.1	3.2e-20	-	109089488	109089757	0	1	269,	0
chr1	109090292	109090382	ENSG00000273382.1	0.0022	-	109090292	109090382	0	1	90,	0
chr1	109279644	109279734	ENSG00000134222.16	0.00098	-	109279644	109279734	0	1	90,	0
chr1	109279852	109280121	ENSG00000134222.16	1e-55	-	109279852	109280121	0	1	269,	0
chr1	109507345	109507405	ENSG00000181754.7	0.00081	-	109507345	109507405	0	1	60,	0
chr1	109507763	109508063	ENSG00000181754.7	6.3e-15	-	109507763	109508063	0	1	300,	0
chr1	109508361	109508421	ENSG00000181754.7	0.0017	-	109508361	109508421	0	1	60,	0
chr1	109736649	109736799	ENSG00000134202.10	3.5e-06	-	109736649	109736799	0	1	150,	0
chr1	110208863	110209013	ENSG00000224965.1	0.00068	-	110208863	110209013	0	1	150,	0
chr1	110209747	110209927	ENSG00000224965.1	5.5e-06	-	110209747	110209927	0	1	180,	0
chr1	110407553	110407763	ENSG00000134248.13	1e-14	-	110407553	110407763	0	1	210,	0
chr1	111414999	111415239	ENSG00000085465.12	3.9e-08	-	111414999	111415239	0	1	240,	0
chr1	111723751	111723812	ENSG00000197852.12	0.003	-	111723751	111723812	0	1	61,	0
chr1	111724080	111724350	ENSG00000197852.12	5.2e-07	-	111724080	111724350	0	1	270,	0
chr1	111726738	111727038	ENSG00000197852.12	0.00015	-	111726738	111727038	0	1	300,	0
chr1	111727156	111727486	ENSG00000197852.12	5e-21	-	111727156	111727486	0	1	330,	0
chr1	111727664	111739198	ENSG00000197852.12	4.3e-05	-	111727664	111739198	0	2	167,13,	0,11521
chr1	111982278	111982399	ENSG00000171385.9	0.0017	-	111982278	111982399	0	1	121,	0
chr1	112619574	112619695	ENSG00000007341.19	0.00072	-	112619574	112619695	0	1	121,	0
chr1	112913815	112917634	ENSG00000155380.11	1e-113	-	112913815	112917634	0	2	350,457,	0,3362
chr1	112956318	112957013	ENSG00000155380.11	5e-12	-	112956318	112957013	0	2	35,175,	0,520
chr1	113765928	113766318	ENSG00000081019.13	3.2e-14	-	113765928	113766318	0	1	390,	0
chr1	113797725	113797906	ENSG00000081019.13	1.3e-10	-	113797725	113797906	0	1	181,	0
chr1	114091797	114091947	ENSG00000134207.16	0.00026	-	114091797	114091947	0	1	150,	0
chr1	114152961	114153770	ENSG00000134207.16	0.00054	-	114152961	114153770	0	2	19,161,	0,648
chr1	114567975	114568186	ENSG00000116752.6	2.5e-16	-	114567975	114568186	0	1	211,	0
chr1	114625258	114625558	ENSG00000175984.15	6.2e-05	-	114625258	114625558	0	1	300,	0
chr1	114774145	114774355	ENSG00000052723.11	1.3e-16	-	114774145	114774355	0	1	210,	0
chr1	116405721	116405782	ENSG00000203865.10	5.5e-05	-	116405721	116405782	0	1	61,	0
chr1	116576794	116576915	ENSG00000143061.17	6.3e-07	-	116576794	116576915	0	1	121,	0
chr1	116577124	116577514	ENSG00000143061.17	2.5e-20	-	116577124	116577514	0	1	390,	0
chr1	116579642	116584680	ENSG00000143061.17	1.3e-16	-	116579642	116584680	0	2	235,36,	0,5002
chr1	116589008	116599965	ENSG00000143061.17	0.0013	-	116589008	116599965	0	2	96,25,	0,10932
chr1	116613999	116614120	ENSG00000143061.17	0.00054	-	116613999	116614120	0	1	121,	0
chr1	116616442	116646917	ENSG00000143061.17	0.00052	-	116616442	116646917	0	2	15,46,	0,30429
chr1	116666494	116667635	ENSG00000143061.17	7.9e-22	-	116666494	116667635	0	2	462,18,	0,1123
chr1	117025571	117025751	ENSG00000236137.1	0.00078	-	117025571	117025751	0	1	180,	0
chr1	117112255	117112436	ENSG00000134253.10	4.1e-09	-	117112255	117112436	0	1	181,	0
chr1	117118121	117118661	ENSG00000134253.10	1.6e-31	-	117118121	117118661	0	1	540,	0
chr1	117120905	117121145	ENSG00000134253.10	2.6e-05	-	117120905	117121145	0	1	240,	0
chr1	119032914	119033184	ENSG00000116874.11	1e-22	-	119032914	119033184	0	1	270,	0
chr1	119623185	119623366	ENSG00000143067.5	6e-05	-	119623185	119623366	0	1	181,	0
chr1	119623425	119647696	ENSG00000143067.5	5e-31	-	119623425	119647696	0	3	691,263,6,	0,2449,24265
chr1	119648055	119648236	ENSG00000143067.5	8.9e-06	-	119648055	119648236	0	1	181,	0
chr1	119914639	119915569	ENSG00000134250.20	1e-119	-	119914639	119915569	0	1	930,	0
chr1	119915688	119915838	ENSG00000134250.20	1.9e-05	-	119915688	119915838	0	1	150,	0
chr1	119923838	119923929	ENSG00000134250.20	0.00058	-	119923838	119923929	0	1	91,	0
chr1	120069423	120072715	ENSG00000134250.20	1.4e-06	-	120069423	120072715	0	2	239,1,	0,3291
chr1	120341421	120341871	ENSG00000223804.5	1e-20	-	120341421	120341871	0	2	85,155,	0,295
chr1	121183937	121184294	ENSG00000188610.12	1e-28	-	121183937	121184294	0	1	357,	0
chr1	144245717	144250297	ENSG00000232527.8	3.1e-05	-	144245717	144250297	0	2	104,73,	0,4507
chr1	144422704	144422945	ENSG00000266338.6	2e-25	-	144422704	144422945	0	1	241,	0
chr1	144461463	144461674	ENSG00000266338.6	3.5e-07	-	144461463	144461674	0	1	211,	0
chr1	145165447	145165508	ENSG00000272419.6	0.0071	-	145165447	145165508	0	1	61,	0
chr1	145168025	145168176	ENSG00000272419.6	8.7e-05	-	145168025	145168176	0	1	151,	0
chr1	145168594	145168715	ENSG00000272419.6	0.00014	-	145168594	145168715	0	1	121,	0
chr1	145168924	145169015	ENSG00000272419.6	0.00021	-	145168924	145169015	0	1	91,	0
chr1	145215847	145215938	ENSG00000272419.6	0.00068	-	145215847	145215938	0	1	91,	0
chr1	145912202	145912406	ENSG00000131779.11	6.3e-18	-	145912202	145912406	0	1	204,	0
chr1	145927034	145927407	ENSG00000265241.6	0.0017	-	145927034	145927407	0	2	43,48,	0,325
chr1	145960216	145960366	ENSG00000272031.3	2.3e-05	-	145960216	145960366	0	1	150,	0
chr1	145960574	145960963	ENSG00000272031.3	2.5e-19	-	145960574	145960963	0	1	389,	0
chr1	145961350	145961768	ENSG00000272031.3	1.3e-07	-	145961350	145961768	0	1	418,	0
chr1	146066045	146066226	ENSG00000271425.8	1.3e-09	-	146066045	146066226	0	1	181,	0
chr1	146228965	146229026	ENSG00000264343.6	0.0026	-	146228965	146229026	0	1	61,	0
chr1	147630430	147630791	ENSG00000162836.12	1.3e-07	-	147630430	147630791	0	1	361,	0
chr1	147670133	147670284	ENSG00000162836.12	0.00045	-	147670133	147670284	0	1	151,	0
chr1	148103778	148103869	ENSG00000263956.6	0.0052	-	148103778	148103869	0	1	91,	0
chr1	148532732	148532943	ENSG00000270629.6	1.4e-06	-	148532732	148532943	0	1	211,	0
chr1	149055434	149055495	ENSG00000269713.7	0.00083	-	149055434	149055495	0	1	61,	0
chr1	149055793	149056526	ENSG00000269713.7	0.00013	-	149055793	149056526	0	2	106,15,	0,718
chr1	149913305	149914024	ENSG00000159164.10	3.2e-12	-	149913305	149914024	0	1	719,	0
chr1	149943445	149947309	ENSG00000264522.6	1e-173	-	149943445	149947309	0	2	1620,59,	0,3805
chr1	150010575	150010726	ENSG00000264522.6	9.8e-06	-	150010575	150010726	0	1	151,	0
chr1	150236066	150236156	ENSG00000143401.15	5.9e-10	-	150236066	150236156	0	1	90,	0
chr1	150266116	150266237	ENSG00000117362.13	4.4e-06	-	150266116	150266237	0	1	121,	0
chr1	150266386	150266596	ENSG00000117362.13	1.6e-35	-	150266386	150266596	0	1	210,	0
chr1	150577004	150578595	ENSG00000143384.13	1e-37	-	150577004	150578595	0	2	487,352,	0,1239
chr1	150578744	150579678	ENSG00000143384.13	6.3e-40	-	150578744	150579678	0	2	33,836,	0,98
chr1	150622134	150622195	ENSG00000143420.18	6e-08	-	150622134	150622195	0	1	61,	0
chr1	150625510	150625631	ENSG00000143420.18	5.4e-05	-	150625510	150625631	0	1	121,	0
chr1	150627155	150627275	ENSG00000143420.18	6.8e-05	-	150627155	150627275	0	1	120,	0
chr1	150629129	150629612	ENSG00000143420.18	1.3e-39	-	150629129	150629612	0	2	11,199,	0,284
chr1	150648223	150648581	ENSG00000143457.11	3.2e-56	-	150648223	150648581	0	1	358,	0
chr1	150960582	150962965	ENSG00000143418.19	5.2e-06	-	150960582	150962965	0	2	173,8,	0,2375
chr1	150974644	150974854	ENSG00000143418.19	1.1e-06	-	150974644	150974854	0	1	210,	0
chr1	150997062	150997481	ENSG00000143409.15	1.6e-16	-	150997062	150997481	0	1	419,	0
chr1	151002309	151002549	ENSG00000143409.15	2.7e-10	-	151002309	151002549	0	1	240,	0
chr1	151002787	151002848	ENSG00000143409.15	0.00068	-	151002787	151002848	0	1	61,	0
chr1	151006431	151006700	ENSG00000143409.15	2e-15	-	151006431	151006700	0	1	269,	0
chr1	151052882	151053302	ENSG00000197622.13	1e-110	-	151052882	151053302	0	1	420,	0
chr1	151067308	151068352	ENSG00000197622.13	0.0045	-	151067308	151068352	0	2	26,34,	0,1010
chr1	151131983	151132553	ENSG00000143434.15	4e-27	-	151131983	151132553	0	1	570,	0
chr1	151132852	151133152	ENSG00000143434.15	1.9e-06	-	151132852	151133152	0	1	300,	0
chr1	151145855	151145945	ENSG00000143434.15	0.00054	-	151145855	151145945	0	1	90,	0
chr1	151146214	151146454	ENSG00000143434.15	1.9e-05	-	151146214	151146454	0	1	240,	0
chr1	151160762	151160972	ENSG00000163155.12	5.8e-10	-	151160762	151160972	0	1	210,	0
chr1	151165290	151165829	ENSG00000163155.12	2e-16	-	151165290	151165829	0	1	539,	0
chr1	151176617	151176798	ENSG00000163159.12	2.5e-18	-	151176617	151176798	0	1	181,	0
chr1	151190016	151195321	ENSG00000163159.12	7.9e-32	-	151190016	151195321	0	2	197,43,	0,5262
chr1	151281680	151281950	ENSG00000232671.6	4.1e-07	-	151281680	151281950	0	1	270,	0
chr1	151292455	151292756	ENSG00000143393.16	3.2e-50	-	151292455	151292756	0	1	301,	0
chr1	151315590	151316460	ENSG00000143393.16	1e-70	-	151315590	151316460	0	1	870,	0
chr1	151342437	151342888	ENSG00000143390.17	4.9e-10	-	151342437	151342888	0	1	451,	0
chr1	151402933	151403143	ENSG00000143442.22	1.3e-11	-	151402933	151403143	0	1	210,	0
chr1	151404729	151406377	ENSG00000143442.22	6.3e-65	-	151404729	151406377	0	1	1648,	0
chr1	151790409	151790847	ENSG00000182134.16	0.0054	-	151790409	151790847	0	2	113,38,	0,400
chr1	151874273	151874483	ENSG00000159445.13	3.2e-16	-	151874273	151874483	0	1	210,	0
chr1	153561521	153563463	ENSG00000196754.11	0.0045	-	153561521	153563463	0	2	70,49,	0,1893
chr1	153618816	153618907	ENSG00000189171.14	8.5e-05	-	153618816	153618907	0	1	91,	0
chr1	153634062	153634340	ENSG00000271853.5	4.4e-05	-	153634062	153634340	0	2	49,98,	0,180
chr1	153631583	153631672	ENSG00000272030.1	0.00062	-	153631583	153631672	0	1	89,	0
chr1	153634059	153634280	ENSG00000272030.1	3.9e-06	-	153634059	153634280	0	2	51,67,	0,154
chr1	153827564	153828207	ENSG00000143614.10	2e-25	-	153827564	153828207	0	2	46,195,	0,448
chr1	153977770	153977860	ENSG00000285641.1	5.5e-06	-	153977770	153977860	0	1	90,	0
chr1	154183008	154183668	ENSG00000143549.21	6.3e-25	-	154183008	154183668	0	2	241,60,	0,600
chr1	154207355	154207506	ENSG00000143612.20	7.6e-07	-	154207355	154207506	0	1	151,	0
chr1	154550072	154550462	ENSG00000160714.10	1e-259	-	154550072	154550462	0	1	390,	0
chr1	154558243	154559028	ENSG00000160714.10	2.5e-26	-	154558243	154559028	0	2	419,121,	0,664
chr1	154584725	154584966	ENSG00000160710.17	6.3e-48	-	154584725	154584966	0	1	241,	0
chr1	154601185	154601726	ENSG00000160710.17	1e-172	-	154601185	154601726	0	1	541,	0
chr1	154602265	154602506	ENSG00000160710.17	6.3e-14	-	154602265	154602506	0	1	241,	0
chr1	154945812	154946231	ENSG00000163346.17	4e-35	-	154945812	154946231	0	1	419,	0
chr1	154946409	154946589	ENSG00000163346.17	3.7e-05	-	154946409	154946589	0	1	180,	0
chr1	154958484	154959617	ENSG00000163348.4	1e-70	-	154958484	154959617	0	1	1133,	0
chr1	154961923	154963734	ENSG00000163348.4	4e-26	-	154961923	154963734	0	2	113,216,	0,1595
chr1	154962357	154962508	ENSG00000160691.18	3.8e-05	-	154962357	154962508	0	1	151,	0
chr1	154963644	154963735	ENSG00000160691.18	0.00059	-	154963644	154963735	0	1	91,	0
chr1	155140186	155140364	ENSG00000179085.7	7.2e-09	-	155140186	155140364	0	1	178,	0
chr1	155173376	155173435	ENSG00000273088.2	3.2e-05	-	155173376	155173435	0	1	59,	0
chr1	155237367	155237960	ENSG00000177628.16	3.6e-07	-	155237367	155237960	0	2	211,29,	0,564
chr1	155250550	155250641	ENSG00000160767.21	2.9e-07	-	155250550	155250641	0	1	91,	0
chr1	155260565	155260625	ENSG00000116521.11	0.00066	-	155260565	155260625	0	1	60,	0
chr1	155262131	155262311	ENSG00000116521.11	5.1e-08	-	155262131	155262311	0	1	180,	0
chr1	155268687	155268838	ENSG00000176444.19	0.00034	-	155268687	155268838	0	1	151,	0
chr1	155273230	155278431	ENSG00000176444.19	2.5e-12	-	155273230	155278431	0	2	274,57,	0,5144
chr1	155321511	155321661	ENSG00000225855.7	2.2e-06	-	155321511	155321661	0	1	150,	0
chr1	155438484	155438964	ENSG00000116539.13	2e-16	-	155438484	155438964	0	1	480,	0
chr1	155477887	155478247	ENSG00000116539.13	6.3e-17	-	155477887	155478247	0	1	360,	0
chr1	155481629	155482049	ENSG00000116539.13	2.5e-21	-	155481629	155482049	0	1	420,	0
chr1	155520332	155521345	ENSG00000116539.13	3.2e-34	-	155520332	155521345	0	2	24,246,	0,767
chr1	155562567	155562777	ENSG00000116539.13	2.9e-06	-	155562567	155562777	0	1	210,	0
chr1	155659678	155659947	ENSG00000246203.2	7.9e-25	-	155659678	155659947	0	1	269,	0
chr1	155659682	155659952	ENSG00000163374.19	4e-25	-	155659682	155659952	0	1	270,	0
chr1	155660370	155660521	ENSG00000163374.19	4.7e-05	-	155660370	155660521	0	1	151,	0
chr1	155660759	155660880	ENSG00000163374.19	9.3e-07	-	155660759	155660880	0	1	121,	0
chr1	155749721	155749992	ENSG00000116580.18	1e-19	-	155749721	155749992	0	1	271,	0
chr1	155750201	155750622	ENSG00000116580.18	1.3e-43	-	155750201	155750622	0	1	421,	0
chr1	155751984	155752284	ENSG00000116580.18	1.6e-18	-	155751984	155752284	0	1	300,	0
chr1	155752373	155752584	ENSG00000116580.18	4.6e-10	-	155752373	155752584	0	1	211,	0
chr1	155765172	155765803	ENSG00000116580.18	1.6e-28	-	155765172	155765803	0	1	631,	0
chr1	155766162	155766313	ENSG00000116580.18	1.4e-06	-	155766162	155766313	0	1	151,	0
chr1	155766552	155766673	ENSG00000116580.18	0.0019	-	155766552	155766673	0	1	121,	0
chr1	155853334	155853485	ENSG00000116580.18	0.00018	-	155853334	155853485	0	1	151,	0
chr1	155913223	155913463	ENSG00000132680.11	1.3e-31	-	155913223	155913463	0	1	240,	0
chr1	155913970	155914120	ENSG00000132680.11	4.9e-06	-	155913970	155914120	0	1	150,	0
chr1	155947718	155950301	ENSG00000116584.18	1.3e-30	-	155947718	155950301	0	2	297,33,	0,2550
chr1	155951064	155951125	ENSG00000116584.18	0.00098	-	155951064	155951125	0	1	61,	0
chr1	156009047	156009257	ENSG00000163479.14	4e-29	-	156009047	156009257	0	1	210,	0
chr1	156035447	156035628	ENSG00000160803.8	1.2e-05	-	156035447	156035628	0	1	181,	0
chr1	156053678	156053798	ENSG00000160803.8	1.3e-07	-	156053678	156053798	0	1	120,	0
chr1	156076266	156077644	ENSG00000254726.3	1e-135	-	156076266	156077644	0	1	1378,	0
chr1	156081625	156081926	ENSG00000254726.3	1.6e-13	-	156081625	156081926	0	1	301,	0
chr1	156082254	156082465	ENSG00000254726.3	5e-18	-	156082254	156082465	0	1	211,	0
chr1	156250391	156250542	ENSG00000198952.8	1.3e-13	-	156250391	156250542	0	1	151,	0
chr1	156265836	156266316	ENSG00000198952.8	1e-138	-	156265836	156266316	0	1	480,	0
chr1	156282614	156282825	ENSG00000198952.8	1e-101	-	156282614	156282825	0	1	211,	0
chr1	156292717	156292808	ENSG00000198715.13	6.3e-05	-	156292717	156292808	0	1	91,	0
chr1	156292867	156293047	ENSG00000198715.13	3.5e-07	-	156292867	156293047	0	1	180,	0
chr1	156526123	156526364	ENSG00000183856.11	1.6e-12	-	156526123	156526364	0	1	241,	0
chr1	156539177	156539268	ENSG00000183856.11	0.0029	-	156539177	156539268	0	1	91,	0
chr1	156594606	156594847	ENSG00000160818.16	1e-112	-	156594606	156594847	0	1	241,	0
chr1	156594966	156595626	ENSG00000160818.16	6.3e-59	-	156594966	156595626	0	1	660,	0
chr1	156669929	156670230	ENSG00000132688.11	2e-07	-	156669929	156670230	0	1	301,	0
chr1	156671037	156671427	ENSG00000132688.11	4.6e-10	-	156671037	156671427	0	1	390,	0
chr1	156672204	156672385	ENSG00000132688.11	1.2e-06	-	156672204	156672385	0	1	181,	0
chr1	156723175	156723445	ENSG00000143319.16	1e-198	-	156723175	156723445	0	1	270,	0
chr1	156725847	156727514	ENSG00000143319.16	0	-	156725847	156727514	0	2	20,609,	0,1058
chr1	156727572	156727723	ENSG00000143319.16	4.4e-07	-	156727572	156727723	0	1	151,	0
chr1	156727901	156728171	ENSG00000143319.16	1.3e-52	-	156727901	156728171	0	1	270,	0
chr1	156728559	156728799	ENSG00000143319.16	3.2e-48	-	156728559	156728799	0	1	240,	0
chr1	156935887	156935947	ENSG00000132694.18	0.0014	-	156935887	156935947	0	1	60,	0
chr1	157124783	157133176	ENSG00000117036.12	1e-174	-	157124783	157133176	0	2	1196,32,	0,8361
chr1	157135686	157138474	ENSG00000117036.12	1e-14	-	157135686	157138474	0	3	22,59,159,	0,620,2629
chr1	159923459	159923550	ENSG00000158710.14	5e-12	-	159923459	159923550	0	1	91,	0
chr1	159927337	159927398	ENSG00000085552.17	0.00081	-	159927337	159927398	0	1	61,	0
chr1	159928647	159928738	ENSG00000085552.17	0.00081	-	159928647	159928738	0	1	91,	0
chr1	160029534	160029715	ENSG00000143315.7	1.2e-06	-	160029534	160029715	0	1	181,	0
chr1	160030163	160030494	ENSG00000143315.7	1.3e-15	-	160030163	160030494	0	1	331,	0
chr1	160030762	160031721	ENSG00000143315.7	1e-71	-	160030762	160031721	0	1	959,	0
chr1	160031870	160031991	ENSG00000143315.7	0.00019	-	160031870	160031991	0	1	121,	0
chr1	160093009	160093278	ENSG00000162729.14	1.3e-14	-	160093009	160093278	0	1	269,	0
chr1	160098471	160098561	ENSG00000162729.14	0.00047	-	160098471	160098561	0	1	90,	0
chr1	160217333	160217574	ENSG00000132716.18	6.3e-21	-	160217333	160217574	0	1	241,	0
chr1	160239458	160240329	ENSG00000132716.18	7.9e-81	-	160239458	160240329	0	1	871,	0
chr1	160262350	160262531	ENSG00000132716.18	9.8e-06	-	160262350	160262531	0	1	181,	0
chr1	160217375	160217586	ENSG00000258465.8	7.9e-22	-	160217375	160217586	0	1	211,	0
chr1	160238717	160240325	ENSG00000258465.8	7.9e-82	-	160238717	160240325	0	2	30,629,	0,979
chr1	160289849	160289910	ENSG00000122218.16	0.0032	-	160289849	160289910	0	1	61,	0
chr1	160998114	160998385	ENSG00000158769.18	4e-21	-	160998114	160998385	0	1	271,	0
chr1	160998105	160998374	ENSG00000270149.5	4e-20	-	160998105	160998374	0	1	269,	0
chr1	161039280	161039999	ENSG00000158773.14	2.5e-88	-	161039280	161039999	0	1	719,	0
chr1	161041653	161041803	ENSG00000158773.14	1.2e-06	-	161041653	161041803	0	1	150,	0
chr1	161047994	161048474	ENSG00000186517.14	1.6e-24	-	161047994	161048474	0	1	480,	0
chr1	161049222	161049462	ENSG00000186517.14	3.9e-08	-	161049222	161049462	0	2	112,39,	0,201
chr1	161117965	161118055	ENSG00000143256.5	1e-06	-	161117965	161118055	0	1	90,	0
chr1	161122012	161122339	ENSG00000158796.17	1e-110	-	161122012	161122339	0	1	327,	0
chr1	161171548	161171998	ENSG00000158850.15	6.3e-80	-	161171548	161171998	0	1	450,	0
chr1	161229903	161230798	ENSG00000143257.11	4e-45	-	161229903	161230798	0	2	23,454,	0,441
chr1	168084630	168085768	ENSG00000143147.14	4e-90	-	168084630	168085768	0	1	1138,	0
chr1	168090590	168096759	ENSG00000143147.14	2e-37	-	168090590	168096759	0	2	78,252,	0,5917
chr1	168096818	168096998	ENSG00000143147.14	6e-07	-	168096818	168096998	0	1	180,	0
chr1	168136341	168136552	ENSG00000143147.14	6.2e-05	-	168136341	168136552	0	1	211,	0
chr1	168137187	168137278	ENSG00000143147.14	0.0001	-	168137187	168137278	0	1	91,	0
chr1	169421657	169421867	ENSG00000117477.12	1.6e-12	-	169421657	169421867	0	1	210,	0
chr1	169422014	169422135	ENSG00000117477.12	0.0011	-	169422014	169422135	0	1	121,	0
chr1	169853460	169853670	ENSG00000000457.14	8.1e-05	-	169853460	169853670	0	1	210,	0
chr1	172441494	172441704	ENSG00000135845.10	2.1e-05	-	172441494	172441704	0	1	210,	0
chr1	172442421	172442781	ENSG00000135845.10	6.3e-66	-	172442421	172442781	0	1	360,	0
chr1	173803100	173803371	ENSG00000120334.15	4e-26	-	173803100	173803371	0	1	271,	0
chr1	173824421	173824600	ENSG00000120334.15	0.00033	-	173824421	173824600	0	2	52,39,	0,140
chr1	174022146	174022297	ENSG00000135870.11	3.5e-06	-	174022146	174022297	0	1	151,	0
chr1	179107568	179109217	ENSG00000143322.21	7.9e-65	-	179107568	179109217	0	1	1649,	0
chr1	179143053	179229684	ENSG00000143322.21	2e-18	-	179143053	179229684	0	2	36,444,	0,86187
chr1	179845629	179845689	ENSG00000169905.12	9.1e-06	-	179845629	179845689	0	1	60,	0
chr1	179846018	179846618	ENSG00000169905.12	1e-118	-	179846018	179846618	0	1	600,	0
chr1	179865148	179865748	ENSG00000169905.12	1e-192	-	179865148	179865748	0	1	600,	0
chr1	180269861	180269922	ENSG00000230124.8	4.6e-05	-	180269861	180269922	0	1	61,	0
chr1	180274955	180275016	ENSG00000230124.8	0.0013	-	180274955	180275016	0	1	61,	0
chr1	180502205	180502804	ENSG00000230124.8	2.5e-31	-	180502205	180502804	0	1	599,	0
chr1	180976122	180976482	ENSG00000243155.1	5e-46	-	180976122	180976482	0	1	360,	0
chr1	180976099	180976610	ENSG00000135823.14	1.3e-50	-	180976099	180976610	0	1	511,	0
chr1	181022640	181022851	ENSG00000135823.14	1e-12	-	181022640	181022851	0	1	211,	0
chr1	182384335	182384455	ENSG00000135821.18	5.9e-05	-	182384335	182384455	0	1	120,	0
chr1	182585506	182585626	ENSG00000135828.11	0.00054	-	182585506	182585626	0	1	120,	0
chr1	182585864	182586373	ENSG00000135828.11	6.3e-10	-	182585864	182586373	0	1	509,	0
chr1	182586491	182586612	ENSG00000135828.11	8.9e-06	-	182586491	182586612	0	1	121,	0
chr1	182598979	182599306	ENSG00000143333.7	1e-109	-	182598979	182599306	0	1	327,	0
chr1	182599781	182600495	ENSG00000143333.7	1e-168	-	182599781	182600495	0	1	714,	0
chr1	183250031	183250182	ENSG00000157064.11	0.00068	-	183250031	183250182	0	1	151,	0
chr1	183633084	183633235	ENSG00000162704.16	0.0014	-	183633084	183633235	0	1	151,	0
chr1	183633924	183635783	ENSG00000162704.16	2e-17	-	183633924	183635783	0	2	34,267,	0,1592
chr1	183935877	183936147	ENSG00000198756.12	1.6e-13	-	183935877	183936147	0	1	270,	0
chr1	184694072	184694342	ENSG00000116406.19	2.5e-12	-	184694072	184694342	0	1	270,	0
chr1	190098344	190098584	ENSG00000162670.11	2e-05	-	190098344	190098584	0	1	240,	0
chr1	193059430	193059692	ENSG00000116750.13	3.1e-06	-	193059430	193059692	0	2	91,60,	0,202
chr1	197101318	197101529	ENSG00000066279.18	7.9e-42	-	197101318	197101529	0	1	211,	0
chr1	197159486	197159577	ENSG00000177888.7	0.00068	-	197159486	197159577	0	1	91,	0
chr1	197159636	197159846	ENSG00000177888.7	8.9e-06	-	197159636	197159846	0	1	210,	0
chr1	197510704	197510765	ENSG00000213047.13	0.0026	-	197510704	197510765	0	1	61,	0
chr1	200406312	200406492	ENSG00000162702.8	1.3e-16	-	200406312	200406492	0	1	180,	0
chr1	200407028	200407685	ENSG00000162702.8	1e-46	-	200407028	200407685	0	1	657,	0
chr1	200408222	200408372	ENSG00000162702.8	3.5e-10	-	200408222	200408372	0	1	150,	0
chr1	200408550	200408790	ENSG00000162702.8	2e-16	-	200408550	200408790	0	1	240,	0
chr1	200408968	200410056	ENSG00000162702.8	1.3e-42	-	200408968	200410056	0	2	755,111,	0,977
chr1	200617803	200618043	ENSG00000118193.12	1.3e-11	-	200617803	200618043	0	1	240,	0
chr1	200666073	200666134	ENSG00000118197.14	0.00014	-	200666073	200666134	0	1	61,	0
chr1	200971369	200971520	ENSG00000116852.14	0.00024	-	200971369	200971520	0	1	151,	0
chr1	200999353	200999920	ENSG00000116852.14	0.00016	-	200999353	200999920	0	2	113,38,	0,529
chr1	201154256	201154407	ENSG00000116857.17	8.3e-05	-	201154256	201154407	0	1	151,	0
chr1	201465816	201466337	ENSG00000174307.6	2e-36	-	201465816	201466337	0	2	362,27,	0,494
chr1	201467553	201468430	ENSG00000174307.6	1.4e-05	-	201467553	201468430	0	2	30,90,	0,787
chr1	201468549	201469177	ENSG00000174307.6	7.9e-23	-	201468549	201469177	0	1	628,	0
chr1	201829114	201829233	ENSG00000231871.5	3.2e-07	-	201829114	201829233	0	1	119,	0
chr1	201897290	201897619	ENSG00000163431.13	0.00043	-	201897290	201897619	0	1	329,	0
chr1	201897678	201897858	ENSG00000163431.13	4.3e-05	-	201897678	201897858	0	1	180,	0
chr1	201899440	201899739	ENSG00000163431.13	7.9e-11	-	201899440	201899739	0	1	299,	0
chr1	201900156	201900634	ENSG00000163431.13	2e-20	-	201900156	201900634	0	1	478,	0
chr1	201946319	201946499	ENSG00000163431.13	8.9e-06	-	201946319	201946499	0	1	180,	0
chr1	202728812	202729113	ENSG00000117139.17	3.2e-32	-	202728812	202729113	0	1	301,	0
chr1	202729832	202729983	ENSG00000117139.17	7.9e-07	-	202729832	202729983	0	1	151,	0
chr1	202733401	202733552	ENSG00000117139.17	1e-05	-	202733401	202733552	0	1	151,	0
chr1	202852215	202852485	ENSG00000214796.8	1.8e-06	-	202852215	202852485	0	1	270,	0
chr1	202852753	202853232	ENSG00000214796.8	1.6e-41	-	202852753	202853232	0	1	479,	0
chr1	202857709	202858021	ENSG00000214796.8	5.5e-06	-	202857709	202858021	0	2	86,94,	0,218
chr1	202880875	202881176	ENSG00000183155.4	1.6e-47	-	202880875	202881176	0	1	301,	0
chr1	204222114	204222445	ENSG00000143850.15	2.3e-08	-	204222114	204222445	0	1	331,	0
chr1	204406069	204406279	ENSG00000158615.9	2.5e-21	-	204406069	204406279	0	1	210,	0
chr1	204409605	204410114	ENSG00000158615.9	6.3e-41	-	204409605	204410114	0	1	509,	0
chr1	204410591	204411548	ENSG00000158615.9	1.3e-57	-	204410591	204411548	0	1	957,	0
chr1	204424576	204424756	ENSG00000133056.13	5e-11	-	204424576	204424756	0	1	180,	0
chr1	204468928	204469739	ENSG00000133056.13	1.6e-19	-	204468928	204469739	0	1	811,	0
chr1	204617588	204617888	ENSG00000170382.12	7.9e-14	-	204617588	204617888	0	1	300,	0
chr1	204617977	204618127	ENSG00000170382.12	0.00068	-	204617977	204618127	0	1	150,	0
chr1	204618306	204618546	ENSG00000170382.12	1.8e-08	-	204618306	204618546	0	1	240,	0
chr1	204619234	204619564	ENSG00000170382.12	5.5e-06	-	204619234	204619564	0	1	330,	0
chr1	204685587	204685648	ENSG00000170382.12	0.0054	-	204685587	204685648	0	1	61,	0
chr1	205083513	205083957	ENSG00000174529.7	5e-35	-	205083513	205083957	0	1	444,	0
chr1	205147265	205147625	ENSG00000133059.17	1.6e-60	-	205147265	205147625	0	1	360,	0
chr1	205169272	205169722	ENSG00000133059.17	4e-83	-	205169272	205169722	0	1	450,	0
chr1	205173375	205187699	ENSG00000133059.17	2.5e-22	-	205173375	205187699	0	2	18,282,	0,14042
chr1	205187788	205211313	ENSG00000133059.17	0.0019	-	205187788	205211313	0	2	18,43,	0,23482
chr1	205211491	205211702	ENSG00000133059.17	2.5e-14	-	205211491	205211702	0	1	211,	0
chr1	205302357	205302538	ENSG00000163545.9	8.7e-09	-	205302357	205302538	0	1	181,	0
chr1	205302955	205303256	ENSG00000163545.9	6.2e-05	-	205302955	205303256	0	1	301,	0
chr1	205303434	205303644	ENSG00000163545.9	1.7e-07	-	205303434	205303644	0	1	210,	0
chr1	205616486	205616607	ENSG00000158711.13	0.00031	-	205616486	205616607	0	1	121,	0
chr1	205620041	205620791	ENSG00000158711.13	1e-32	-	205620041	205620791	0	1	750,	0
chr1	205663123	205663422	ENSG00000158715.6	6.3e-11	-	205663123	205663422	0	1	299,	0
chr1	205769385	205769654	ENSG00000117280.13	1.3e-80	-	205769385	205769654	0	1	269,	0
chr1	205801013	205810514	ENSG00000133065.11	4e-22	-	205801013	205810514	0	3	47,168,445,	0,307,9056
chr1	205810633	205811023	ENSG00000133065.11	5e-12	-	205810633	205811023	0	1	390,	0
chr1	205812832	205813042	ENSG00000133065.11	5.8e-06	-	205812832	205813042	0	1	210,	0
chr1	207048484	207049113	ENSG00000180667.10	1e-11	-	207048484	207049113	0	1	629,	0
chr1	207049321	207049561	ENSG00000180667.10	3.2e-34	-	207049321	207049561	0	1	240,	0
chr1	208027065	208027126	ENSG00000076356.7	0.0032	-	208027065	208027126	0	1	61,	0
chr1	208216776	208217196	ENSG00000076356.7	3.2e-27	-	208216776	208217196	0	1	420,	0
chr1	208217435	208217556	ENSG00000076356.7	0.00044	-	208217435	208217556	0	1	121,	0
chr1	208217645	208230283	ENSG00000076356.7	3.2e-12	-	208217645	208230283	0	2	357,93,	0,12545
chr1	208230462	208244264	ENSG00000076356.7	5e-12	-	208230462	208244264	0	2	8,622,	0,13180
chr1	209782786	209783593	ENSG00000162757.4	2.5e-18	-	209782786	209783593	0	1	807,	0
chr1	211575605	211575785	ENSG00000170385.10	0.00015	-	211575605	211575785	0	1	180,	0
chr1	211578203	211578294	ENSG00000170385.10	0.0035	-	211578203	211578294	0	1	91,	0
chr1	211578502	211579101	ENSG00000170385.10	6.3e-17	-	211578502	211579101	0	1	599,	0
chr1	211941744	211942044	ENSG00000143493.13	1.6e-13	-	211941744	211942044	0	1	300,	0
chr1	212364970	212365179	ENSG00000065600.12	6e-10	-	212364970	212365179	0	1	209,	0
chr1	212558395	212558634	ENSG00000260805.2	5.5e-06	-	212558395	212558634	0	1	239,	0
chr1	212686565	212687501	ENSG00000123685.9	3.2e-39	-	212686565	212687501	0	2	414,35,	0,901
chr1	212699690	212699840	ENSG00000123685.9	1.8e-05	-	212699690	212699840	0	1	150,	0
chr1	212726541	212727081	ENSG00000117697.15	1e-18	-	212726541	212727081	0	1	540,	0
chr1	212738371	212738581	ENSG00000117697.15	4e-16	-	212738371	212738581	0	1	210,	0
chr1	213001893	213002043	ENSG00000174606.14	0.00024	-	213001893	213002043	0	1	150,	0
chr1	214383337	214384596	ENSG00000152104.12	1e-21	-	214383337	214384596	0	1	1259,	0
chr1	214532314	214532404	ENSG00000152104.12	0.0013	-	214532314	214532404	0	1	90,	0
chr1	217619864	217620254	ENSG00000092978.11	1.3e-97	-	217619864	217620254	0	1	390,	0
chr1	220266475	220266626	ENSG00000118873.16	3.3e-06	-	220266475	220266626	0	1	151,	0
chr1	221739032	221739182	ENSG00000143507.18	0.00034	-	221739032	221739182	0	1	150,	0
chr1	223780609	223780849	ENSG00000143514.17	2e-20	-	223780609	223780849	0	1	240,	0
chr1	223795937	223796326	ENSG00000143514.17	1.3e-15	-	223795937	223796326	0	1	389,	0
chr1	223951572	223951841	ENSG00000272645.3	4e-21	-	223951572	223951841	0	1	269,	0
chr1	224389490	224389851	ENSG00000162923.16	1e-147	-	224389490	224389851	0	1	361,	0
chr1	224433742	224434432	ENSG00000162923.16	6.3e-64	-	224433742	224434432	0	1	690,	0
chr1	224434521	224435834	ENSG00000162923.16	3.2e-41	-	224434521	224435834	0	2	273,118,	0,1195
chr1	225487134	225487404	ENSG00000154380.17	6.3e-78	-	225487134	225487404	0	1	270,	0
chr1	225497532	225498367	ENSG00000154380.17	7.9e-61	-	225497532	225498367	0	2	280,21,	0,814
chr1	225517579	225517760	ENSG00000154380.17	3.2e-05	-	225517579	225517760	0	1	181,	0
chr1	225519172	225519532	ENSG00000154380.17	1.6e-36	-	225519172	225519532	0	1	360,	0
chr1	225652871	225653022	ENSG00000154380.17	9.1e-06	-	225652871	225653022	0	1	151,	0
chr1	225846585	225846706	ENSG00000196187.12	0.00037	-	225846585	225846706	0	1	121,	0
chr1	225846795	225847077	ENSG00000196187.12	0.00012	-	225846795	225847077	0	2	137,44,	0,238
chr1	225920055	225920294	ENSG00000143811.19	3.2e-12	-	225920055	225920294	0	1	239,	0
chr1	225985278	225988311	ENSG00000143751.10	1e-191	-	225985278	225988311	0	2	245,416,	0,2617
chr1	226146741	226152554	ENSG00000182827.9	2e-92	-	226146741	226152554	0	2	80,220,	0,5593
chr1	226232459	226232580	ENSG00000183814.15	0.00016	-	226232459	226232580	0	1	121,	0
chr1	226308877	226309124	ENSG00000183814.15	3.5e-07	-	226308877	226309124	0	2	194,16,	0,231
chr1	226309570	226309631	ENSG00000183814.15	0.00049	-	226309570	226309631	0	1	61,	0
chr1	226407942	226408093	ENSG00000143799.13	5e-62	-	226407942	226408093	0	1	151,	0
chr1	226642022	226642112	ENSG00000143772.9	0.0017	-	226642022	226642112	0	1	90,	0
chr1	226735670	226736958	ENSG00000143772.9	2.5e-56	-	226735670	226736958	0	1	1288,	0
chr1	226737017	226737198	ENSG00000143772.9	8.1e-05	-	226737017	226737198	0	1	181,	0
chr1	226737436	226737497	ENSG00000143772.9	0.0013	-	226737436	226737497	0	1	61,	0
chr1	226993999	226994180	ENSG00000143776.18	4.5e-09	-	226993999	226994180	0	1	181,	0
chr1	227028798	227029218	ENSG00000143776.18	1.6e-13	-	227028798	227029218	0	1	420,	0
chr1	227317664	227318474	ENSG00000143776.18	5e-82	-	227317664	227318474	0	1	810,	0
chr1	227731413	227732906	ENSG00000081692.12	1e-286	-	227731413	227732906	0	2	1263,26,	0,1467
chr1	227733145	227733325	ENSG00000081692.12	6.3e-14	-	227733145	227733325	0	1	180,	0
chr1	227734103	227734224	ENSG00000081692.12	1e-09	-	227734103	227734224	0	1	121,	0
chr1	227734676	227735081	ENSG00000081692.12	2.5e-13	-	227734676	227735081	0	2	140,70,	0,335
chr1	227921613	227921823	ENSG00000143816.8	0.00043	-	227921613	227921823	0	1	210,	0
chr1	228100875	228101234	ENSG00000143793.13	7.9e-21	-	228100875	228101234	0	1	359,	0
chr1	228102125	228102904	ENSG00000143793.13	5e-11	-	228102125	228102904	0	2	563,6,	0,773
chr1	228103825	228103916	ENSG00000143793.13	0.00093	-	228103825	228103916	0	1	91,	0
chr1	228104124	228104753	ENSG00000143793.13	2.5e-34	-	228104124	228104753	0	1	629,	0
chr1	228105111	228105321	ENSG00000143793.13	0.00079	-	228105111	228105321	0	1	210,	0
chr1	228106678	228106829	ENSG00000162910.19	1.5e-10	-	228106678	228106829	0	1	151,	0
chr1	228205803	228205984	ENSG00000162913.10	3.8e-05	-	228205803	228205984	0	1	181,	0
chr1	228212730	228212881	ENSG00000162913.10	3.3e-07	-	228212730	228212881	0	1	151,	0
chr1	228360039	228360220	ENSG00000287315.1	0.00014	-	228360039	228360220	0	1	181,	0
chr1	228394122	228395993	ENSG00000154370.16	1e-235	-	228394122	228395993	0	2	1130,460,	0,1411
chr1	228396382	228396623	ENSG00000154370.16	1.7e-06	-	228396382	228396623	0	1	241,	0
chr1	228396742	228397073	ENSG00000154370.16	1.3e-23	-	228396742	228397073	0	1	331,	0
chr1	228401006	228401097	ENSG00000154370.16	2.2e-05	-	228401006	228401097	0	1	91,	0
chr1	228406414	228406745	ENSG00000154370.16	5e-17	-	228406414	228406745	0	1	331,	0
chr1	228457127	228457366	ENSG00000181218.5	1.6e-30	-	228457127	228457366	0	1	239,	0
chr1	229092930	229093259	ENSG00000236975.2	8.7e-05	-	229092930	229093259	0	1	329,	0
chr1	229268174	229268773	ENSG00000177788.6	3.2e-16	-	229268174	229268773	0	1	599,	0
chr1	229269281	229269521	ENSG00000177788.6	3.2e-20	-	229269281	229269521	0	1	240,	0
chr1	229325051	229325321	ENSG00000154429.11	1.6e-25	-	229325051	229325321	0	1	270,	0
chr1	229326886	229327066	ENSG00000154429.11	4.9e-08	-	229326886	229327066	0	1	180,	0
chr1	229342270	229342965	ENSG00000154429.11	5e-08	-	229342270	229342965	0	2	247,54,	0,641
chr1	229518073	229518253	ENSG00000135776.5	7.6e-07	-	229518073	229518253	0	1	180,	0
chr1	229593230	229593381	ENSG00000135801.9	0.00031	-	229593230	229593381	0	1	151,	0
chr1	229593919	229599217	ENSG00000135801.9	5e-79	-	229593919	229599217	0	2	1175,24,	0,5274
chr1	229602182	229602692	ENSG00000135801.9	5e-23	-	229602182	229602692	0	1	510,	0
chr1	229625896	229626047	ENSG00000135801.9	2.6e-09	-	229625896	229626047	0	1	151,	0
chr1	230322093	230322423	ENSG00000177614.11	1.3e-35	-	230322093	230322423	0	1	330,	0
chr1	230322811	230323561	ENSG00000177614.11	3.2e-65	-	230322811	230323561	0	1	750,	0
chr1	230332916	230336156	ENSG00000177614.11	0.00032	-	230332916	230336156	0	2	125,56,	0,3184
chr1	230356946	230357096	ENSG00000177614.11	1.3e-07	-	230356946	230357096	0	1	150,	0
chr1	230425792	230425973	ENSG00000177614.11	5.5e-06	-	230425792	230425973	0	1	181,	0
chr1	230693395	230693604	ENSG00000286859.1	3.6e-10	-	230693395	230693604	0	1	209,	0
chr1	230838937	230839058	ENSG00000119280.16	4.9e-06	-	230838937	230839058	0	1	121,	0
chr1	231019668	231020055	ENSG00000182118.8	1e-113	-	231019668	231020055	0	1	387,	0
chr1	231019827	231019924	ENSG00000283799.1	1.6e-24	-	231019827	231019924	0	1	97,	0
chr1	231224211	231224301	ENSG00000143633.13	6.9e-06	-	231224211	231224301	0	1	90,	0
chr1	231335571	231337852	ENSG00000116903.7	1e-229	-	231335571	231337852	0	1	2281,	0
chr1	231421031	231421450	ENSG00000135766.9	2e-23	-	231421031	231421450	0	1	419,	0
chr1	231421509	231422287	ENSG00000135766.9	6.3e-15	-	231421509	231422287	0	1	778,	0
chr1	232514049	232514320	ENSG00000116991.10	1.3e-14	-	232514049	232514320	0	1	271,	0
chr1	232514888	232515009	ENSG00000116991.10	0.00093	-	232514888	232515009	0	1	121,	0
chr1	232515068	232515159	ENSG00000116991.10	0.00028	-	232515068	232515159	0	1	91,	0
chr1	232983914	232984155	ENSG00000135749.19	8.9e-08	-	232983914	232984155	0	1	241,	0
chr1	232984244	232984455	ENSG00000135749.19	1.7e-05	-	232984244	232984455	0	1	211,	0
chr1	232984604	232984785	ENSG00000135749.19	0.0003	-	232984604	232984785	0	1	181,	0
chr1	232985653	232985804	ENSG00000135749.19	0.00023	-	232985653	232985804	0	1	151,	0
chr1	232985893	232986044	ENSG00000135749.19	0.0001	-	232985893	232986044	0	1	151,	0
chr1	233258128	233258668	ENSG00000135749.19	2e-75	-	233258128	233258668	0	1	540,	0
chr1	233258757	233259208	ENSG00000135749.19	4e-41	-	233258757	233259208	0	1	451,	0
chr1	234478190	234478670	ENSG00000059588.10	1e-13	-	234478190	234478670	0	1	480,	0
chr1	234478819	234479089	ENSG00000059588.10	0.00022	-	234478819	234479089	0	1	270,	0
chr1	234606988	234607766	ENSG00000168264.10	0	-	234606988	234607766	0	1	778,	0
chr1	234608478	234609525	ENSG00000168264.10	7.9e-42	-	234608478	234609525	0	1	1047,	0
chr1	235131752	235131932	ENSG00000188739.15	6.3e-11	-	235131752	235131932	0	1	180,	0
chr1	235131753	235131933	ENSG00000054267.22	4e-11	-	235131753	235131933	0	1	180,	0
chr1	235168433	235168494	ENSG00000054267.22	0.00063	-	235168433	235168494	0	1	61,	0
chr1	235181910	235182300	ENSG00000054267.22	6.3e-73	-	235181910	235182300	0	1	390,	0
chr1	235759155	235759216	ENSG00000143669.13	0.0046	-	235759155	235759216	0	1	61,	0
chr1	236536475	236536704	ENSG00000273058.2	7.9e-12	-	236536475	236536704	0	1	229,	0
chr1	241634058	241634448	ENSG00000203668.2	9.8e-08	-	241634058	241634448	0	1	390,	0
chr1	241634597	241634778	ENSG00000203668.2	0.0003	-	241634597	241634778	0	1	181,	0
chr1	241635195	241635316	ENSG00000203668.2	0.0015	-	241635195	241635316	0	1	121,	0
chr1	241635435	241635944	ENSG00000203668.2	1e-24	-	241635435	241635944	0	1	509,	0
chr1	243056544	243056694	ENSG00000214837.8	0.0028	-	243056544	243056694	0	1	150,	0
chr1	243164513	243164814	ENSG00000143702.16	5e-38	-	243164513	243164814	0	1	301,	0
chr1	243165652	243165893	ENSG00000143702.16	4.2e-08	-	243165652	243165893	0	1	241,	0
chr1	243185931	243186171	ENSG00000143702.16	1.3e-06	-	243185931	243186171	0	1	240,	0
chr1	243191228	243191319	ENSG00000143702.16	0.0037	-	243191228	243191319	0	1	91,	0
chr1	244862670	244862821	ENSG00000153187.20	3e-06	-	244862670	244862821	0	1	151,	0
chr1	244863690	244864200	ENSG00000153187.20	1e-174	-	244863690	244864200	0	1	510,	0
chr1	244864289	244864530	ENSG00000153187.20	4e-64	-	244864289	244864530	0	1	241,	0
chr1	246849745	246849896	ENSG00000153207.15	1.4e-05	-	246849745	246849896	0	1	151,	0
chr1	246850975	246851246	ENSG00000153207.15	4.3e-05	-	246850975	246851246	0	1	271,	0
chr1	246986701	246986881	ENSG00000197472.15	8.7e-05	-	246986701	246986881	0	1	180,	0
chr1	246988042	246988103	ENSG00000197472.15	0.00068	-	246988042	246988103	0	1	61,	0
chr1	247100561	247100922	ENSG00000188295.14	4.9e-07	-	247100561	247100922	0	1	361,	0
chr1	247111584	247111645	ENSG00000221953.5	0.0028	-	247111584	247111645	0	1	61,	0
chr1	247190450	247190721	ENSG00000227671.4	1.4e-05	-	247190450	247190721	0	1	271,	0
chr1	247299954	247308619	ENSG00000162714.12	1e-204	-	247299954	247308619	0	2	1322,145,	0,8520
chr1	247328850	247329322	ENSG00000162714.12	1.3e-05	-	247328850	247329322	0	2	16,134,	0,338
chr1	248811404	248811465	ENSG00000175137.11	0.0025	-	248811404	248811465	0	1	61,	0
chr1	248811943	248812304	ENSG00000175137.11	2.5e-72	-	248811943	248812304	0	1	361,	0
chr1	248850005	248850336	ENSG00000171163.15	1.3e-21	-	248850005	248850336	0	1	331,	0
chr1	248858486	248858847	ENSG00000171163.15	6.2e-06	-	248858486	248858847	0	1	361,	0
chr2	3379824	3388705	ENSG00000171853.16	1e-29	+	3379824	3388705	0	2	52,1086,	0,7795
chr2	3561484	3561545	ENSG00000234171.3	0.0012	+	3561484	3561545	0	1	61,	0
chr2	3643926	3644047	ENSG00000118004.17	0.00034	+	3643926	3644047	0	1	121,	0
chr2	8683006	8684043	ENSG00000115738.10	1.3e-54	+	8683006	8684043	0	2	1,359,	0,678
chr2	9207034	9279361	ENSG00000151693.11	0.001	+	9207034	9279361	0	2	196,45,	0,72282
chr2	10047804	10048461	ENSG00000172059.11	1.6e-22	+	10047804	10048461	0	1	657,	0
chr2	10052509	10052659	ENSG00000172059.11	0.00011	+	10052509	10052659	0	1	150,	0
chr2	10210527	10210798	ENSG00000171848.15	2.5e-12	+	10210527	10210798	0	1	271,	0
chr2	10211186	10211426	ENSG00000171848.15	3.5e-06	+	10211186	10211426	0	1	240,	0
chr2	10448748	10448839	ENSG00000257135.7	0.0028	+	10448748	10448839	0	1	91,	0
chr2	10449196	10449347	ENSG00000257135.7	3.8e-05	+	10449196	10449347	0	1	151,	0
chr2	10450004	10450065	ENSG00000257135.7	0.0028	+	10450004	10450065	0	1	61,	0
chr2	10450213	10450577	ENSG00000257135.7	1.4e-05	+	10450213	10450577	0	2	68,142,	0,222
chr2	10691533	10691623	ENSG00000243819.4	0.0045	+	10691533	10691623	0	1	90,	0
chr2	10691741	10691950	ENSG00000243819.4	2.3e-05	+	10691741	10691950	0	1	209,	0
chr2	10912022	10912113	ENSG00000162975.5	0.0017	+	10912022	10912113	0	1	91,	0
chr2	10913778	10914195	ENSG00000162975.5	2e-42	+	10913778	10914195	0	1	417,	0
chr2	11591761	11591942	ENSG00000196208.14	1.4e-05	+	11591761	11591942	0	1	181,	0
chr2	11640391	11640751	ENSG00000196208.14	4e-42	+	11640391	11640751	0	1	360,	0
chr2	17781727	17781877	ENSG00000178295.15	0.00014	+	17781727	17781877	0	1	150,	0
chr2	17783853	17784244	ENSG00000178295.15	2.5e-33	+	17783853	17784244	0	1	391,	0
chr2	20447073	20448912	ENSG00000143878.9	0	+	20447073	20448912	0	1	1839,	0
chr2	20667233	20671536	ENSG00000143869.7	1.3e-60	+	20667233	20671536	0	2	397,1073,	0,3230
chr2	20677593	20677684	ENSG00000143869.7	0.00026	+	20677593	20677684	0	1	91,	0
chr2	23385328	23385389	ENSG00000119771.15	0.0039	+	23385328	23385389	0	1	61,	0
chr2	23689311	23689372	ENSG00000119771.15	0.0028	+	23689311	23689372	0	1	61,	0
chr2	23696449	23696659	ENSG00000119771.15	7.4e-06	+	23696449	23696659	0	1	210,	0
chr2	23697018	23697198	ENSG00000119771.15	2.2e-05	+	23697018	23697198	0	1	180,	0
chr2	23706634	23706844	ENSG00000119771.15	6.3e-08	+	23706634	23706844	0	1	210,	0
chr2	23707113	23707353	ENSG00000119771.15	1e-05	+	23707113	23707353	0	1	240,	0
chr2	23927434	23927585	ENSG00000173960.14	0.00026	+	23927434	23927585	0	1	151,	0
chr2	23999720	24000051	ENSG00000173960.14	1e-26	+	23999720	24000051	0	1	331,	0
chr2	24023218	24023339	ENSG00000205639.11	0.00023	+	24023218	24023339	0	1	121,	0
chr2	24095477	24095836	ENSG00000219626.9	1.3e-11	+	24095477	24095836	0	1	359,	0
chr2	24097358	24124197	ENSG00000219626.9	0.0001	+	24097358	24124197	0	3	110,65,35,	0,26110,26804
chr2	24707268	24707419	ENSG00000084676.15	1.9e-06	+	24707268	24707419	0	1	151,	0
chr2	24707508	24707719	ENSG00000084676.15	5e-17	+	24707508	24707719	0	1	211,	0
chr2	24768273	24768484	ENSG00000084676.15	3.2e-19	+	24768273	24768484	0	1	211,	0
chr2	24769892	24770103	ENSG00000084676.15	1.1e-09	+	24769892	24770103	0	1	211,	0
chr2	24819467	24820427	ENSG00000138092.11	1e-98	+	24819467	24820427	0	1	960,	0
chr2	24820576	24820877	ENSG00000138092.11	2e-20	+	24820576	24820877	0	1	301,	0
chr2	24821805	24821926	ENSG00000138092.11	1.5e-05	+	24821805	24821926	0	1	121,	0
chr2	24825789	24825999	ENSG00000271936.1	3.5e-08	+	24825789	24825999	0	1	210,	0
chr2	24826237	24826567	ENSG00000271936.1	2e-35	+	24826237	24826567	0	1	330,	0
chr2	25154487	25154728	ENSG00000084710.14	2.3e-08	+	25154487	25154728	0	1	241,	0
chr2	26034083	26034264	ENSG00000084733.11	1.6e-06	+	26034083	26034264	0	1	181,	0
chr2	26184325	26184505	ENSG00000157833.13	1.2e-05	+	26184325	26184505	0	1	180,	0
chr2	26184684	26185043	ENSG00000157833.13	1e-32	+	26184684	26185043	0	1	359,	0
chr2	26186223	26187484	ENSG00000157833.13	7.2e-08	+	26186223	26187484	0	2	135,254,	0,1007
chr2	26187841	26188678	ENSG00000157833.13	7.9e-51	+	26187841	26188678	0	1	837,	0
chr2	26389163	26389283	ENSG00000138018.18	3.7e-05	+	26389163	26389283	0	1	120,	0
chr2	26778103	26778670	ENSG00000213699.9	5e-100	+	26778103	26778670	0	1	567,	0
chr2	26780992	26781171	ENSG00000213699.9	6.3e-20	+	26780992	26781171	0	1	179,	0
chr2	26948071	26948192	ENSG00000157851.17	6.8e-05	+	26948071	26948192	0	1	121,	0
chr2	27032939	27033119	ENSG00000119777.20	2.2e-06	+	27032939	27033119	0	1	180,	0
chr2	27040735	27040886	ENSG00000119777.20	7.1e-08	+	27040735	27040886	0	1	151,	0
chr2	27082151	27082272	ENSG00000138080.13	0.00036	+	27082151	27082272	0	1	121,	0
chr2	27082391	27086348	ENSG00000138080.13	7.9e-12	+	27082391	27086348	0	5	1635,117,18,138,671,	0,2023,2599,2768,3286
chr2	27087164	27092365	ENSG00000138030.13	1.2e-06	+	27087164	27092365	0	3	187,79,34,	0,779,5167
chr2	27212115	27212353	ENSG00000138085.16	2e-11	+	27212115	27212353	0	1	238,	0
chr2	27356843	27357912	ENSG00000234072.1	5e-10	+	27356843	27357912	0	3	13,153,105,	0,296,964
chr2	27358719	27359049	ENSG00000234072.1	1.3e-27	+	27358719	27359049	0	1	330,	0
chr2	27359167	27359318	ENSG00000234072.1	0.0022	+	27359167	27359318	0	1	151,	0
chr2	27359467	27359946	ENSG00000234072.1	1.6e-23	+	27359467	27359946	0	1	479,	0
chr2	27377265	27377535	ENSG00000115234.11	1.3e-29	+	27377265	27377535	0	1	270,	0
chr2	27581280	27581461	ENSG00000221843.4	0.00026	+	27581280	27581461	0	1	181,	0
chr2	27650219	27650310	ENSG00000198522.13	0.00058	+	27650219	27650310	0	1	91,	0
chr2	27663829	27663890	ENSG00000163798.13	4.1e-05	+	27663829	27663890	0	1	61,	0
chr2	27664098	27664369	ENSG00000163798.13	4.5e-09	+	27664098	27664369	0	1	271,	0
chr2	28411953	28412074	ENSG00000075426.12	8.7e-05	+	28411953	28412074	0	1	121,	0
chr2	28412312	28412823	ENSG00000075426.12	2.5e-14	+	28412312	28412823	0	1	511,	0
chr2	28946661	28947021	ENSG00000163811.12	5e-34	+	28946661	28947021	0	1	360,	0
chr2	29181716	29181777	ENSG00000115295.20	8.7e-05	+	29181716	29181777	0	1	61,	0
chr2	31266304	31266485	ENSG00000013016.16	1.1e-07	+	31266304	31266485	0	1	181,	0
chr2	31267772	31268013	ENSG00000013016.16	0.00014	+	31267772	31268013	0	1	241,	0
chr2	32220613	32220703	ENSG00000152683.14	0.001	+	32220613	32220703	0	1	90,	0
chr2	32357027	32357208	ENSG00000115760.14	8.9e-06	+	32357027	32357208	0	1	181,	0
chr2	32415041	32415191	ENSG00000115760.14	2.2e-05	+	32415041	32415191	0	1	150,	0
chr2	32415460	32415611	ENSG00000115760.14	8.5e-10	+	32415460	32415611	0	1	151,	0
chr2	32415849	32416090	ENSG00000115760.14	5.2e-07	+	32415849	32416090	0	1	241,	0
chr2	36355867	36356107	ENSG00000150938.10	5.4e-07	+	36355867	36356107	0	1	240,	0
chr2	36356166	36356436	ENSG00000150938.10	9.8e-08	+	36356166	36356436	0	1	270,	0
chr2	37248280	37248461	ENSG00000003509.16	1.4e-05	+	37248280	37248461	0	1	181,	0
chr2	38734332	38734720	ENSG00000143891.17	1e-37	+	38734332	38734720	0	1	388,	0
chr2	38781535	38782014	ENSG00000152147.11	1e-209	+	38781535	38782014	0	1	479,	0
chr2	38784164	38784315	ENSG00000152147.11	9.8e-07	+	38784164	38784315	0	1	151,	0
chr2	42329852	42330213	ENSG00000143924.19	1.3e-19	+	42329852	42330213	0	1	361,	0
chr2	43227329	43227509	ENSG00000279873.2	0.00014	+	43227329	43227509	0	1	180,	0
chr2	43699903	43699994	ENSG00000152527.14	0.00016	+	43699903	43699994	0	1	91,	0
chr2	44168982	44169103	ENSG00000138032.21	0.00076	+	44168982	44169103	0	1	121,	0
chr2	44201313	44201914	ENSG00000138032.21	6.3e-79	+	44201313	44201914	0	1	601,	0
chr2	44168969	44169119	ENSG00000285542.1	0.00093	+	44168969	44169119	0	1	150,	0
chr2	44201326	44201922	ENSG00000285542.1	2.5e-78	+	44201326	44201922	0	1	596,	0
chr2	44944967	44945117	ENSG00000138083.5	0.00043	+	44944967	44945117	0	1	150,	0
chr2	45651344	45652034	ENSG00000171132.14	7.9e-19	+	45651344	45652034	0	1	690,	0
chr2	46184933	46185473	ENSG00000171132.14	1.3e-06	+	46184933	46185473	0	1	540,	0
chr2	46581012	46581073	ENSG00000119729.12	4.6e-05	+	46581012	46581073	0	1	61,	0
chr2	46758592	46758682	ENSG00000171150.9	0.00036	+	46758592	46758682	0	1	90,	0
chr2	46758831	46759160	ENSG00000171150.9	1.5e-07	+	46758831	46759160	0	1	329,	0
chr2	46759369	46759938	ENSG00000171150.9	6.3e-14	+	46759369	46759938	0	1	569,	0
chr2	47798782	47798903	ENSG00000116062.15	9.3e-07	+	47798782	47798903	0	1	121,	0
chr2	47799201	47799562	ENSG00000116062.15	6.3e-33	+	47799201	47799562	0	1	361,	0
chr2	47800639	47801209	ENSG00000116062.15	1e-120	+	47800639	47801209	0	1	570,	0
chr2	47807794	47807974	ENSG00000116062.15	2.4e-08	+	47807794	47807974	0	1	180,	0
chr2	48346269	48346600	ENSG00000170802.16	1e-39	+	48346269	48346600	0	1	331,	0
chr2	48375311	48375431	ENSG00000170802.16	7.6e-07	+	48375311	48375431	0	1	120,	0
chr2	48580832	48580983	ENSG00000243244.6	2.2e-06	+	48580832	48580983	0	1	151,	0
chr2	48582002	48582153	ENSG00000243244.6	0.00079	+	48582002	48582153	0	1	151,	0
chr2	48580813	48580993	ENSG00000068781.21	3.5e-06	+	48580813	48580993	0	1	180,	0
chr2	48582005	48582155	ENSG00000068781.21	0.00079	+	48582005	48582155	0	1	150,	0
chr2	53970837	53971077	ENSG00000170634.13	2.5e-15	+	53970837	53971077	0	1	240,	0
chr2	54558561	54558831	ENSG00000115306.16	1e-32	+	54558561	54558831	0	1	270,	0
chr2	54625971	54626062	ENSG00000115306.16	0.00076	+	54625971	54626062	0	1	91,	0
chr2	54629145	54629206	ENSG00000115306.16	0.0045	+	54629145	54629206	0	1	61,	0
chr2	54629355	54629655	ENSG00000115306.16	1.6e-15	+	54629355	54629655	0	1	300,	0
chr2	54630987	54631528	ENSG00000115306.16	4e-32	+	54630987	54631528	0	1	541,	0
chr2	54649619	54649920	ENSG00000115306.16	4e-19	+	54649619	54649920	0	1	301,	0
chr2	54660004	54660155	ENSG00000115306.16	7.6e-06	+	54660004	54660155	0	1	151,	0
chr2	54723648	54724563	ENSG00000214595.11	0.00068	+	54723648	54724563	0	2	129,22,	0,893
chr2	55224279	55225192	ENSG00000227799.1	2.5e-23	+	55224279	55225192	0	2	231,487,	0,426
chr2	55284223	55284403	ENSG00000162997.15	0.00036	+	55284223	55284403	0	1	180,	0
chr2	55617937	55618112	ENSG00000272606.1	2.3e-05	+	55617937	55618112	0	1	175,	0
chr2	56193085	56193146	ENSG00000055813.6	0.0017	+	56193085	56193146	0	1	61,	0
chr2	56193383	56342882	ENSG00000055813.6	0.0071	+	56193383	56342882	0	2	57,4,	0,149495
chr2	58159530	58159651	ENSG00000028116.17	4.2e-06	+	58159530	58159651	0	1	121,	0
chr2	60922130	60922371	ENSG00000162924.14	2e-16	+	60922130	60922371	0	1	241,	0
chr2	60928039	60928190	ENSG00000162924.14	0.00076	+	60928039	60928190	0	1	151,	0
chr2	60928699	60928880	ENSG00000162924.14	0.00016	+	60928699	60928880	0	1	181,	0
chr2	60928939	60929390	ENSG00000162924.14	6.3e-10	+	60928939	60929390	0	1	451,	0
chr2	60928027	60928177	ENSG00000267520.2	0.00035	+	60928027	60928177	0	1	150,	0
chr2	60928714	60928864	ENSG00000267520.2	0.00016	+	60928714	60928864	0	1	150,	0
chr2	60928953	60929401	ENSG00000267520.2	6.3e-10	+	60928953	60929401	0	1	448,	0
chr2	61031918	61032009	ENSG00000162928.9	0.00054	+	61031918	61032009	0	1	91,	0
chr2	61177567	61178077	ENSG00000173209.23	2.5e-18	+	61177567	61178077	0	1	510,	0
chr2	61178766	61179007	ENSG00000173209.23	1.6e-15	+	61178766	61179007	0	1	241,	0
chr2	61188055	61188655	ENSG00000173209.23	5e-26	+	61188055	61188655	0	1	600,	0
chr2	62222408	62222677	ENSG00000170340.11	7.2e-10	+	62222408	62222677	0	1	269,	0
chr2	62222765	62222975	ENSG00000170340.11	7.2e-09	+	62222765	62222975	0	1	210,	0
chr2	62223212	62223272	ENSG00000170340.11	0.00081	+	62223212	62223272	0	1	60,	0
chr2	62948754	62948905	ENSG00000115504.14	3.8e-06	+	62948754	62948905	0	1	151,	0
chr2	63055926	63056076	ENSG00000115507.10	0.00036	+	63055926	63056076	0	1	150,	0
chr2	63056224	63056345	ENSG00000115507.10	0.00032	+	63056224	63056345	0	1	121,	0
chr2	63056642	63056852	ENSG00000115507.10	8.5e-07	+	63056642	63056852	0	1	210,	0
chr2	63057000	63057150	ENSG00000115507.10	0.0019	+	63057000	63057150	0	1	150,	0
chr2	64458461	64458700	ENSG00000119862.13	6.8e-08	+	64458461	64458700	0	1	239,	0
chr2	64552688	64553167	ENSG00000119844.15	1e-13	+	64552688	64553167	0	1	479,	0
chr2	64989463	64989584	ENSG00000115902.11	0.00063	+	64989463	64989584	0	1	121,	0
chr2	65021082	65021472	ENSG00000115902.11	1.3e-27	+	65021082	65021472	0	1	390,	0
chr2	65069474	65069655	ENSG00000011523.14	4.9e-05	+	65069474	65069655	0	1	181,	0
chr2	65072228	65072648	ENSG00000011523.14	1.3e-63	+	65072228	65072648	0	1	420,	0
chr2	65227812	65228211	ENSG00000138071.13	3.2e-07	+	65227812	65228211	0	2	145,36,	0,363
chr2	66571350	66571741	ENSG00000143995.20	1.2e-09	+	66571350	66571741	0	1	391,	0
chr2	67403534	67403894	ENSG00000143971.8	2.8e-07	+	67403534	67403894	0	1	360,	0
chr2	69245669	69246059	ENSG00000169604.19	7.9e-13	+	69245669	69246059	0	1	390,	0
chr2	69829659	69837561	ENSG00000087338.5	1.6e-16	+	69829659	69837561	0	2	493,15,	0,7887
chr2	69937390	69938272	ENSG00000059728.11	5.2e-07	+	69937390	69938272	0	2	4,176,	0,706
chr2	69940368	69940519	ENSG00000059728.11	0.00023	+	69940368	69940519	0	1	151,	0
chr2	70087453	70087958	ENSG00000169564.6	1e-252	+	70087453	70087958	0	1	505,	0
chr2	70088016	70088195	ENSG00000169564.6	1.7e-10	+	70088016	70088195	0	1	179,	0
chr2	70088253	70088699	ENSG00000169564.6	1.6e-74	+	70088253	70088699	0	1	446,	0
chr2	70277235	70277506	ENSG00000116005.12	1.3e-47	+	70277235	70277506	0	1	271,	0
chr2	70900575	70900814	ENSG00000116035.4	1.3e-19	+	70900575	70900814	0	1	239,	0
chr2	70932936	70933383	ENSG00000116035.4	1.6e-21	+	70932936	70933383	0	1	447,	0
chr2	71068548	71068789	ENSG00000124357.13	1.3e-13	+	71068548	71068789	0	1	241,	0
chr2	71133279	71133459	ENSG00000124383.9	7.9e-11	+	71133279	71133459	0	1	180,	0
chr2	71348901	71349262	ENSG00000075292.19	1e-27	+	71348901	71349262	0	1	361,	0
chr2	71349861	71350042	ENSG00000075292.19	1.7e-09	+	71349861	71350042	0	1	181,	0
chr2	71423029	71423480	ENSG00000075292.19	4e-34	+	71423029	71423480	0	1	451,	0
chr2	71426553	71426764	ENSG00000075292.19	7.9e-14	+	71426553	71426764	0	1	211,	0
chr2	71427273	71428540	ENSG00000075292.19	4.5e-06	+	71427273	71428540	0	2	141,10,	0,1257
chr2	72891354	72891593	ENSG00000116096.6	2.5e-35	+	72891354	72891593	0	1	239,	0
chr2	72917536	72917656	ENSG00000135638.13	0.00016	+	72917536	72917656	0	1	120,	0
chr2	72934057	72934236	ENSG00000135638.13	8.5e-06	+	72934057	72934236	0	1	179,	0
chr2	73225668	73226209	ENSG00000135632.12	4e-40	+	73225668	73226209	0	2	33,414,	0,127
chr2	73448605	73449176	ENSG00000116127.18	1.1e-07	+	73448605	73449176	0	1	571,	0
chr2	73489644	73489765	ENSG00000116127.18	1.4e-05	+	73489644	73489765	0	1	121,	0
chr2	73491383	73491474	ENSG00000116127.18	0.00054	+	73491383	73491474	0	1	91,	0
chr2	73572440	73572861	ENSG00000116127.18	5e-38	+	73572440	73572861	0	1	421,	0
chr2	73986103	73986343	ENSG00000235499.1	1.6e-78	+	73986103	73986343	0	1	240,	0
chr2	73986403	73986673	ENSG00000187605.15	1.7e-10	+	73986403	73986673	0	1	270,	0
chr2	74002778	74046796	ENSG00000187605.15	6.3e-17	+	74002778	74046796	0	3	23,57,519,	0,331,43499
chr2	74047783	74047874	ENSG00000187605.15	9.1e-06	+	74047783	74047874	0	1	91,	0
chr2	74100604	74100664	ENSG00000187605.15	0.0011	+	74100604	74100664	0	1	60,	0
chr2	74100783	74102191	ENSG00000187605.15	5e-82	+	74100783	74102191	0	1	1408,	0
chr2	74102309	74102460	ENSG00000187605.15	0.00052	+	74102309	74102460	0	1	151,	0
chr2	74103267	74103388	ENSG00000187605.15	0.00016	+	74103267	74103388	0	1	121,	0
chr2	74120679	74121096	ENSG00000257800.1	5e-12	+	74120679	74121096	0	1	417,	0
chr2	74122256	74123010	ENSG00000257800.1	2e-07	+	74122256	74123010	0	2	194,15,	0,739
chr2	74123964	74130673	ENSG00000217702.3	5.5e-05	+	74123964	74130673	0	2	117,91,	0,6618
[truncated: 18,220 more rows]

## Sheet: ORL_1
chr	chromStart	chromEnd	name	score	strand	thickStart	thickEnd	itemRgb	blockCount	blockSizes	blockStarts
chr1	629204	629376	ENSG00000225972.1	4e-07	+	629204	629376	0	1	172,	0
chr1	630086	630236	ENSG00000225630.1	5.6e-07	+	630086	630236	0	1	150,	0
chr1	630414	630653	ENSG00000225630.1	1.8e-05	+	630414	630653	0	1	239,	0
chr1	631073	631282	ENSG00000237973.1	1.9e-06	+	631073	631282	0	1	209,	0
chr1	631370	631756	ENSG00000237973.1	3.2e-27	+	631370	631756	0	1	386,	0
chr1	632170	632468	ENSG00000237973.1	3.2e-24	+	632170	632468	0	1	298,	0
chr1	632756	633231	ENSG00000229344.1	2e-11	+	632756	633231	0	1	475,	0
chr1	633534	633653	ENSG00000240409.1	0.00019	+	633534	633653	0	1	119,	0
chr1	633695	633785	ENSG00000248527.1	5.6e-07	+	633695	633785	0	1	90,	0
chr1	634138	634376	ENSG00000248527.1	5.6e-10	+	634138	634376	0	1	238,	0
chr1	634375	634893	ENSG00000198744.5	1.6e-46	+	634375	634893	0	1	518,	0
chr1	1055188	1055309	ENSG00000188157.15	6e-06	+	1055188	1055309	0	1	121,	0
chr1	1233847	1233997	ENSG00000176022.7	2e-05	+	1233847	1233997	0	1	150,	0
chr1	1311616	1311677	ENSG00000169972.12	0.001	+	1311616	1311677	0	1	61,	0
chr1	1399578	1399698	ENSG00000224870.7	0.00028	+	1399578	1399698	0	1	120,	0
chr1	1400797	1400917	ENSG00000224870.7	0.00012	+	1400797	1400917	0	1	120,	0
chr1	2307072	2307252	ENSG00000157933.10	1.1e-05	+	2307072	2307252	0	1	180,	0
chr1	2307640	2308090	ENSG00000157933.10	3.2e-18	+	2307640	2308090	0	1	450,	0
chr1	2308298	2308389	ENSG00000157933.10	0.00032	+	2308298	2308389	0	1	91,	0
chr1	2308956	2309017	ENSG00000157933.10	0.00044	+	2308956	2309017	0	1	61,	0
chr1	2403944	2404035	ENSG00000157916.20	0.00054	+	2403944	2404035	0	1	91,	0
chr1	3746489	3747851	ENSG00000162592.10	4.2e-08	+	3746489	3747851	0	2	202,38,	0,1324
chr1	6621856	6621976	ENSG00000116273.6	5.1e-05	+	6621856	6621976	0	1	120,	0
chr1	6635495	6635556	ENSG00000041988.15	0.00063	+	6635495	6635556	0	1	61,	0
chr1	7985025	7985146	ENSG00000116288.13	5.8e-05	+	7985025	7985146	0	1	121,	0
chr1	8328066	8328151	ENSG00000252254.1	0.00028	+	8328066	8328151	0	1	85,	0
chr1	9265103	9265224	ENSG00000049239.12	1.8e-05	+	9265103	9265224	0	1	121,	0
chr1	9268699	9268820	ENSG00000049239.12	0.00028	+	9268699	9268820	0	1	121,	0
chr1	9269868	9269929	ENSG00000049239.12	9.8e-05	+	9269868	9269929	0	1	61,	0
chr1	9582356	9582507	ENSG00000171612.7	0.00016	+	9582356	9582507	0	1	151,	0
chr1	9602530	9602681	ENSG00000188807.13	2.2e-06	+	9602530	9602681	0	1	151,	0
chr1	9613228	9613289	ENSG00000188807.13	0.0013	+	9613228	9613289	0	1	61,	0
chr1	9947490	9947578	ENSG00000202415.1	0.001	+	9947490	9947578	0	1	88,	0
chr1	10073109	10095571	ENSG00000130939.19	0.00028	+	10073109	10095571	0	2	9,111,	0,22351
chr1	10171172	10171233	ENSG00000130939.19	0.00035	+	10171172	10171233	0	1	61,	0
chr1	10304433	10304674	ENSG00000054523.17	8.5e-06	+	10304433	10304674	0	1	241,	0
chr1	10378964	10379055	ENSG00000054523.17	3.5e-05	+	10378964	10379055	0	1	91,	0
chr1	10380193	10380284	ENSG00000054523.17	0.00054	+	10380193	10380284	0	1	91,	0
chr1	10298965	10299072	ENSG00000199562.1	0.00054	+	10298965	10299072	0	1	107,	0
chr1	10399062	10399524	ENSG00000142657.21	0.00087	+	10399062	10399524	0	2	63,27,	0,435
chr1	10431233	10431324	ENSG00000251503.8	0.00054	+	10431233	10431324	0	1	91,	0
chr1	10431268	10431328	ENSG00000175279.22	0.00054	+	10431268	10431328	0	1	60,	0
chr1	10630578	10630698	ENSG00000142655.13	0.00019	+	10630578	10630698	0	1	120,	0
chr1	11023369	11023609	ENSG00000120948.17	2.3e-08	+	11023369	11023609	0	1	240,	0
chr1	11750287	11750377	ENSG00000177674.16	0.0019	+	11750287	11750377	0	1	90,	0
chr1	12011716	12011837	ENSG00000116688.16	0.00044	+	12011716	12011837	0	1	121,	0
chr1	12030014	12031136	ENSG00000116691.11	0.00035	+	12030014	12031136	0	2	110,10,	0,1112
chr1	12276366	12276427	ENSG00000048707.15	0.001	+	12276366	12276427	0	1	61,	0
chr1	12276996	12277057	ENSG00000048707.15	0.00021	+	12276996	12277057	0	1	61,	0
chr1	12282978	12283159	ENSG00000048707.15	1.9e-06	+	12282978	12283159	0	1	181,	0
chr1	12382981	12383042	ENSG00000048707.15	0.00054	+	12382981	12383042	0	1	61,	0
chr1	13616163	13616313	ENSG00000162493.16	0.00046	+	13616163	13616313	0	1	150,	0
chr1	13778800	13778890	ENSG00000116731.22	0.00065	+	13778800	13778890	0	1	90,	0
chr1	13779578	13779788	ENSG00000116731.22	0.00019	+	13779578	13779788	0	1	210,	0
chr1	13780386	13780446	ENSG00000116731.22	0.00028	+	13780386	13780446	0	1	60,	0
chr1	13781164	13781284	ENSG00000116731.22	0.00011	+	13781164	13781284	0	1	120,	0
chr1	13781882	13782062	ENSG00000116731.22	5.8e-05	+	13781882	13782062	0	1	180,	0
chr1	13782271	13782481	ENSG00000116731.22	7.2e-06	+	13782271	13782481	0	1	210,	0
chr1	13786522	13786643	ENSG00000116731.22	0.00035	+	13786522	13786643	0	1	121,	0
chr1	15219523	15219673	ENSG00000171729.14	6.2e-05	+	15219523	15219673	0	1	150,	0
chr1	15481657	15483280	ENSG00000215704.9	3.2e-24	+	15481657	15483280	0	3	92,129,17,	0,607,1606
chr1	15567947	15568008	ENSG00000116138.13	0.00035	+	15567947	15568008	0	1	61,	0
chr1	15659925	15660286	ENSG00000197312.12	7.6e-06	+	15659925	15660286	0	1	361,	0
chr1	15660765	15661126	ENSG00000197312.12	1.6e-06	+	15660765	15661126	0	1	361,	0
chr1	15661305	15661486	ENSG00000197312.12	0.00014	+	15661305	15661486	0	1	181,	0
chr1	15661665	15661786	ENSG00000197312.12	2.3e-05	+	15661665	15661786	0	1	121,	0
chr1	15662355	15662416	ENSG00000197312.12	0.00019	+	15662355	15662416	0	1	61,	0
chr1	15659928	15660228	ENSG00000215695.1	1.1e-05	+	15659928	15660228	0	1	300,	0
chr1	15660765	15661124	ENSG00000215695.1	2.7e-06	+	15660765	15661124	0	1	359,	0
chr1	15661332	15661483	ENSG00000215695.1	0.00014	+	15661332	15661483	0	1	151,	0
chr1	15684439	15716267	ENSG00000116786.13	2.5e-09	+	15684439	15716267	0	2	179,31,	0,31797
chr1	15828377	15828494	ENSG00000178715.8	3.6e-05	+	15828377	15828494	0	1	117,	0
chr1	15872850	15873061	ENSG00000065526.11	2.4e-10	+	15872850	15873061	0	1	211,	0
chr1	15873515	15874234	ENSG00000065526.11	4e-26	+	15873515	15874234	0	1	719,	0
chr1	15876219	15876490	ENSG00000065526.11	1.3e-19	+	15876219	15876490	0	1	271,	0
chr1	15928126	15928337	ENSG00000065526.11	3.6e-06	+	15928126	15928337	0	1	211,	0
chr1	15928546	15928966	ENSG00000065526.11	1.3e-10	+	15928546	15928966	0	1	420,	0
chr1	15929324	15929535	ENSG00000065526.11	2.7e-07	+	15929324	15929535	0	1	211,	0
chr1	15930133	15930313	ENSG00000065526.11	1.1e-06	+	15930133	15930313	0	1	180,	0
chr1	15930462	15930793	ENSG00000065526.11	4e-12	+	15930462	15930793	0	1	331,	0
chr1	15931810	15932110	ENSG00000065526.11	1.6e-14	+	15931810	15932110	0	1	300,	0
chr1	15932858	15932919	ENSG00000065526.11	5e-05	+	15932858	15932919	0	1	61,	0
chr1	15933427	15933847	ENSG00000065526.11	2e-10	+	15933427	15933847	0	1	420,	0
chr1	15933906	15933967	ENSG00000065526.11	0.00048	+	15933906	15933967	0	1	61,	0
chr1	15934864	15935045	ENSG00000065526.11	1.4e-05	+	15934864	15935045	0	1	181,	0
chr1	15935254	15935315	ENSG00000065526.11	0.0015	+	15935254	15935315	0	1	61,	0
chr1	15935583	15935644	ENSG00000065526.11	0.00026	+	15935583	15935644	0	1	61,	0
chr1	15939646	15940007	ENSG00000065526.11	1.3e-21	+	15939646	15940007	0	1	361,	0
chr1	16395192	16395312	ENSG00000055070.17	1e-05	+	16395192	16395312	0	1	120,	0
chr1	16872560	16872771	ENSG00000228549.4	2.7e-09	+	16872560	16872771	0	1	211,	0
chr1	19258790	19258969	ENSG00000053372.5	3.6e-07	+	19258790	19258969	0	1	179,	0
chr1	19259800	19259861	ENSG00000053372.5	0.0015	+	19259800	19259861	0	1	61,	0
chr1	20650943	20651093	ENSG00000158828.8	2.1e-06	+	20650943	20651093	0	1	150,	0
chr1	22030318	22030408	ENSG00000285959.1	0.001	+	22030318	22030408	0	1	90,	0
chr1	22030356	22030417	ENSG00000218510.8	0.00028	+	22030356	22030417	0	1	61,	0
chr1	22052647	22052798	ENSG00000070831.17	0.00018	+	22052647	22052798	0	1	151,	0
chr1	22490219	22490310	ENSG00000184677.18	0.00065	+	22490219	22490310	0	1	91,	0
chr1	22529298	22529419	ENSG00000184677.18	9.5e-06	+	22529298	22529419	0	1	121,	0
chr1	23083598	23083689	ENSG00000004487.16	0.00032	+	23083598	23083689	0	1	91,	0
chr1	23370234	23370443	ENSG00000249087.7	2e-15	+	23370234	23370443	0	1	209,	0
chr1	23370253	23370346	ENSG00000201405.1	0.00035	+	23370253	23370346	0	1	93,	0
chr1	23695870	23696447	ENSG00000142676.14	3e-05	+	23695870	23696447	0	2	76,104,	0,473
chr1	24469265	24469326	ENSG00000001461.17	0.00052	+	24469265	24469326	0	1	61,	0
chr1	24469564	24469625	ENSG00000001461.17	0.00028	+	24469564	24469625	0	1	61,	0
chr1	24666856	24669144	ENSG00000133226.17	0.00045	+	24666856	24669144	0	2	69,22,	0,2266
chr1	25458604	25458724	ENSG00000204178.11	0.00037	+	25458604	25458724	0	1	120,	0
chr1	25498593	25498743	ENSG00000204178.11	2.7e-05	+	25498593	25498743	0	1	150,	0
chr1	25815980	25816071	ENSG00000162430.17	6.6e-06	+	25815980	25816071	0	1	91,	0
chr1	25816757	25816877	ENSG00000162430.17	0.00046	+	25816757	25816877	0	1	120,	0
chr1	25832194	25832374	ENSG00000117640.18	6.6e-07	+	25832194	25832374	0	1	180,	0
chr1	26122075	26122166	ENSG00000175087.10	0.002	+	26122075	26122166	0	1	91,	0
chr1	26170784	26170844	ENSG00000142684.9	0.00043	+	26170784	26170844	0	1	60,	0
chr1	26470196	26470317	ENSG00000117682.17	0.00014	+	26470196	26470317	0	1	121,	0
chr1	26472439	26472619	ENSG00000198830.11	6.3e-17	+	26472439	26472619	0	1	180,	0
chr1	26574372	26574672	ENSG00000117676.14	7.9e-11	+	26574372	26574672	0	1	300,	0
chr1	26574880	26575000	ENSG00000117676.14	1.8e-05	+	26574880	26575000	0	1	120,	0
chr1	26779497	26779677	ENSG00000117713.20	2.4e-05	+	26779497	26779677	0	1	180,	0
chr1	26780096	26780786	ENSG00000117713.20	5.4e-08	+	26780096	26780786	0	1	690,	0
chr1	27308068	27308158	ENSG00000142784.16	0.00014	+	27308068	27308158	0	1	90,	0
chr1	27325218	27325325	ENSG00000206888.1	0	+	27325218	27325325	0	1	107,	0
chr1	27325416	27325562	ENSG00000241547.1	0.001	+	27325416	27325562	0	1	146,	0
chr1	27830781	27830962	ENSG00000117751.18	3.5e-06	+	27830781	27830962	0	1	181,	0
chr1	28236108	28236257	ENSG00000130770.18	1.1e-09	+	28236108	28236257	0	1	149,	0
chr1	28280909	28281238	ENSG00000130766.5	2.5e-11	+	28280909	28281238	0	1	329,	0
chr1	28334571	28335016	ENSG00000130772.14	3.2e-06	+	28334571	28335016	0	1	445,	0
chr1	28466558	28466739	ENSG00000204138.13	1.1e-06	+	28466558	28466739	0	1	181,	0
chr1	28473830	28474011	ENSG00000204138.13	0.00012	+	28473830	28474011	0	1	181,	0
chr1	28489776	28489837	ENSG00000204138.13	0.00068	+	28489776	28489837	0	1	61,	0
chr1	28496765	28496976	ENSG00000204138.13	0.00014	+	28496765	28496976	0	1	211,	0
chr1	28537983	28538194	ENSG00000180198.16	1.7e-05	+	28537983	28538194	0	1	211,	0
chr1	28538462	28538702	ENSG00000180198.16	2.5e-12	+	28538462	28538702	0	1	240,	0
chr1	28507498	28507678	ENSG00000242125.3	2.5e-33	+	28507498	28507678	0	1	180,	0
chr1	28742506	28742775	ENSG00000198492.16	2e-14	+	28742506	28742775	0	1	269,	0
chr1	28743341	28743879	ENSG00000198492.16	1.3e-21	+	28743341	28743879	0	1	538,	0
chr1	28769028	28769179	ENSG00000198492.16	1e-07	+	28769028	28769179	0	1	151,	0
chr1	28987572	28987723	ENSG00000159023.21	2.6e-05	+	28987572	28987723	0	1	151,	0
chr1	29119356	29119536	ENSG00000159023.21	1.4e-09	+	29119356	29119536	0	1	180,	0
chr1	32170992	32171113	ENSG00000025800.14	0.00054	+	32170992	32171113	0	1	121,	0
chr1	32170993	32171138	ENSG00000250135.1	0.00038	+	32170993	32171138	0	1	145,	0
chr1	32195862	32195923	ENSG00000084652.16	0.00043	+	32195862	32195923	0	1	61,	0
chr1	32221986	32222550	ENSG00000084623.11	4e-20	+	32221986	32222550	0	2	46,193,	0,371
chr1	32231514	32231604	ENSG00000084623.11	0.00052	+	32231514	32231604	0	1	90,	0
chr1	32327092	32327153	ENSG00000116478.12	9.1e-05	+	32327092	32327153	0	1	61,	0
chr1	32651171	32651415	ENSG00000162521.19	7.4e-07	+	32651171	32651415	0	2	151,60,	0,184
chr1	32771372	32771523	ENSG00000162522.11	2.1e-05	+	32771372	32771523	0	1	151,	0
chr1	32772150	32772331	ENSG00000162522.11	0.00087	+	32772150	32772331	0	1	181,	0
chr1	32772933	32773024	ENSG00000162522.11	8.7e-05	+	32772933	32773024	0	1	91,	0
chr1	32826478	32826808	ENSG00000116497.18	4e-06	+	32826478	32826808	0	1	330,	0
chr1	33280207	33280327	ENSG00000160094.15	1.2e-05	+	33280207	33280327	0	1	120,	0
chr1	33295268	33299042	ENSG00000160094.15	0.00021	+	33295268	33299042	0	2	37,113,	0,3661
chr1	33494497	33494678	ENSG00000121903.14	0.00054	+	33494497	33494678	0	1	181,	0
chr1	33495037	33495128	ENSG00000121903.14	0.00054	+	33495037	33495128	0	1	91,	0
chr1	34112948	34113063	ENSG00000201148.1	5e-51	+	34112948	34113063	0	1	115,	0
chr1	35114123	35114274	ENSG00000197056.11	3.9e-05	+	35114123	35114274	0	1	151,	0
chr1	35114901	35115051	ENSG00000197056.11	5.4e-05	+	35114901	35115051	0	1	150,	0
chr1	35115290	35115440	ENSG00000197056.11	1.6e-05	+	35115290	35115440	0	1	150,	0
chr1	35359027	35359118	ENSG00000146463.11	0.00015	+	35359027	35359118	0	1	91,	0
chr1	35419538	35419869	ENSG00000146463.11	7.9e-11	+	35419538	35419869	0	1	331,	0
chr1	35560491	35560612	ENSG00000020129.16	2.1e-06	+	35560491	35560612	0	1	121,	0
chr1	35566660	35566824	ENSG00000020129.16	0.00035	+	35566660	35566824	0	2	119,2,	0,162
chr1	35808135	35808255	ENSG00000134698.11	0.00037	+	35808135	35808255	0	1	120,	0
chr1	35919852	35920033	ENSG00000092847.12	1.2e-05	+	35919852	35920033	0	1	181,	0
chr1	36286585	36286914	ENSG00000054118.15	4.8e-10	+	36286585	36286914	0	1	329,	0
chr1	36289210	36289301	ENSG00000054118.15	1.9e-05	+	36289210	36289301	0	1	91,	0
chr1	36303952	36304132	ENSG00000054118.15	0.00013	+	36303952	36304132	0	1	180,	0
chr1	37708323	37708561	ENSG00000134690.11	2.9e-07	+	37708323	37708561	0	1	238,	0
chr1	37794339	37794489	ENSG00000185090.14	5.8e-05	+	37794339	37794489	0	1	150,	0
chr1	37799822	37800151	ENSG00000185090.14	4e-14	+	37799822	37800151	0	1	329,	0
chr1	37800419	37800569	ENSG00000185090.14	0.0003	+	37800419	37800569	0	1	150,	0
chr1	37800628	37800838	ENSG00000185090.14	2.8e-07	+	37800628	37800838	0	1	210,	0
chr1	39026317	39028811	ENSG00000168653.11	1.3e-17	+	39026317	39028811	0	2	85,89,	0,2405
chr1	39034491	39034636	ENSG00000168653.11	3.6e-08	+	39034491	39034636	0	1	145,	0
chr1	39388035	39388156	ENSG00000127603.26	0.00063	+	39388035	39388156	0	1	121,	0
chr1	39409899	39410020	ENSG00000127603.26	0.00018	+	39409899	39410020	0	1	121,	0
chr1	39411489	39411730	ENSG00000127603.26	9.1e-06	+	39411489	39411730	0	1	241,	0
chr1	39412029	39412210	ENSG00000127603.26	6.2e-05	+	39412029	39412210	0	1	181,	0
chr1	39413829	39413920	ENSG00000127603.26	0.0012	+	39413829	39413920	0	1	91,	0
chr1	39414279	39414400	ENSG00000127603.26	0.00012	+	39414279	39414400	0	1	121,	0
chr1	39485796	39485857	ENSG00000127603.26	0.00046	+	39485796	39485857	0	1	61,	0
chr1	40236516	40236757	ENSG00000117000.9	3.5e-08	+	40236516	40236757	0	1	241,	0
chr1	40236936	40237116	ENSG00000117000.9	5.1e-06	+	40236936	40237116	0	1	180,	0
chr1	40238464	40238554	ENSG00000117000.9	0.001	+	40238464	40238554	0	1	90,	0
chr1	40239512	40239573	ENSG00000117000.9	0.00028	+	40239512	40239573	0	1	61,	0
chr1	40240381	40240621	ENSG00000117000.9	1.4e-05	+	40240381	40240621	0	1	240,	0
chr1	40292445	40292745	ENSG00000084073.9	5e-12	+	40292445	40292745	0	1	300,	0
chr1	40422075	40422166	ENSG00000084070.12	0.0003	+	40422075	40422166	0	1	91,	0
chr1	40479148	40479209	ENSG00000187815.10	0.0012	+	40479148	40479209	0	1	61,	0
chr1	40514742	40514951	ENSG00000164002.11	7.1e-05	+	40514742	40514951	0	1	209,	0
chr1	40804934	40805141	ENSG00000264582.2	4.9e-10	+	40804934	40805141	0	1	207,	0
chr1	41011965	41012116	ENSG00000171793.16	2.6e-06	+	41011965	41012116	0	1	151,	0
chr1	42569032	42569139	ENSG00000200254.1	1e-30	+	42569032	42569139	0	1	107,	0
chr1	42682417	42682567	ENSG00000065978.19	1.3e-23	+	42682417	42682567	0	1	150,	0
chr1	42851429	42851549	ENSG00000164011.18	0.00014	+	42851429	42851549	0	1	120,	0
chr1	42851967	42852028	ENSG00000164011.18	0.00035	+	42851967	42852028	0	1	61,	0
chr1	42852087	42852148	ENSG00000164011.18	0.0012	+	42852087	42852148	0	1	61,	0
chr1	42991437	42991544	ENSG00000207256.1	1.3e-29	+	42991437	42991544	0	1	107,	0
chr1	43363084	43363203	ENSG00000117399.14	0.00013	+	43363084	43363203	0	1	119,	0
chr1	43603985	43604136	ENSG00000142949.17	6.2e-06	+	43603985	43604136	0	1	151,	0
chr1	43949740	43949830	ENSG00000117408.11	0.00056	+	43949740	43949830	0	1	90,	0
chr1	43974546	43975146	ENSG00000117410.14	6.6e-10	+	43974546	43975146	0	2	68,203,	0,397
chr1	44412561	44412622	ENSG00000187147.18	6.5e-05	+	44412561	44412622	0	1	61,	0
chr1	44775829	44776010	ENSG00000142937.12	4e-12	+	44775829	44776010	0	1	181,	0
chr1	44775863	44775943	ENSG00000264294.1	0.00014	+	44775863	44775943	0	1	80,	0
chr1	45012189	45012804	ENSG00000126088.14	3.1e-07	+	45012189	45012804	0	2	96,114,	0,501
chr1	45343405	45343525	ENSG00000132773.12	0.00028	+	45343405	45343525	0	1	120,	0
chr1	45583905	45584191	ENSG00000132780.17	1.6e-11	+	45583905	45584191	0	2	7,204,	0,82
chr1	45618633	45618754	ENSG00000132780.17	0.00018	+	45618633	45618754	0	1	121,	0
chr1	46035762	46035912	ENSG00000086015.21	0.00019	+	46035762	46035912	0	1	150,	0
chr1	50326305	50326481	ENSG00000234080.3	8.9e-06	+	50326305	50326481	0	1	176,	0
chr1	50969131	50969251	ENSG00000123080.12	3.2e-05	+	50969131	50969251	0	1	120,	0
chr1	50973916	50974066	ENSG00000123080.12	3.1e-08	+	50973916	50974066	0	1	150,	0
chr1	51107221	51107331	ENSG00000200262.1	0.0012	+	51107221	51107331	0	1	110,	0
chr1	51271202	51271323	ENSG00000123091.5	7.4e-06	+	51271202	51271323	0	1	121,	0
chr1	51973409	51973535	ENSG00000200839.1	0	+	51973409	51973535	0	1	126,	0
chr1	52238671	52238822	ENSG00000157077.14	0.00038	+	52238671	52238822	0	1	151,	0
chr1	52239270	52239361	ENSG00000157077.14	0.00035	+	52239270	52239361	0	1	91,	0
chr1	52633167	52633377	ENSG00000182183.15	1.5e-10	+	52633167	52633377	0	1	210,	0
chr1	52771221	52771671	ENSG00000162378.13	3.2e-13	+	52771221	52771671	0	1	450,	0
chr1	52842779	52842870	ENSG00000203995.9	6.2e-05	+	52842779	52842870	0	1	91,	0
chr1	52857145	52857355	ENSG00000203995.9	4.6e-05	+	52857145	52857355	0	1	210,	0
chr1	52857594	52857744	ENSG00000203995.9	8.7e-05	+	52857594	52857744	0	1	150,	0
chr1	52893203	52893294	ENSG00000203995.9	0.00018	+	52893203	52893294	0	1	91,	0
chr1	53210089	53210390	ENSG00000157184.7	5.1e-07	+	53210089	53210390	0	1	301,	0
chr1	54098259	54098350	ENSG00000116205.14	0.0011	+	54098259	54098350	0	1	91,	0
chr1	54200416	54205024	ENSG00000116221.15	7.9e-15	+	54200416	54205024	0	2	173,7,	0,4601
chr1	54741559	54742308	ENSG00000271723.5	7.9e-21	+	54741559	54742308	0	1	749,	0
chr1	54741583	54742359	ENSG00000243725.7	3.2e-18	+	54741583	54742359	0	1	776,	0
chr1	54887046	54887105	ENSG00000242396.1	0.00042	+	54887046	54887105	0	1	59,	0
chr1	56704028	56704179	ENSG00000162409.11	3.3e-07	+	56704028	56704179	0	1	151,	0
chr1	58769915	58770036	ENSG00000283445.1	1.8e-05	+	58769915	58770036	0	1	121,	0
chr1	61088390	61088661	ENSG00000162599.17	4e-12	+	61088390	61088661	0	1	271,	0
chr1	61816418	61816522	ENSG00000200575.1	7.1e-05	+	61816418	61816522	0	1	104,	0
chr1	62437322	62441501	ENSG00000162607.13	7.9e-12	+	62437322	62441501	0	3	78,239,14,	0,2476,4165
chr1	62444991	62445172	ENSG00000162607.13	5.6e-09	+	62444991	62445172	0	1	181,	0
chr1	62448635	62450335	ENSG00000162607.13	2.6e-05	+	62448635	62450335	0	2	31,90,	0,1610
chr1	62450544	62450755	ENSG00000162607.13	2e-12	+	62450544	62450755	0	1	211,	0
chr1	62816655	62819152	ENSG00000125703.15	5.4e-08	+	62816655	62819152	0	2	153,148,	0,2349
chr1	63655853	63655992	ENSG00000244256.3	7.1e-05	+	63655853	63655992	0	1	139,	0
chr1	64177808	64178109	ENSG00000185483.12	7.1e-05	+	64177808	64178109	0	1	301,	0
chr1	64178707	64178798	ENSG00000185483.12	3.5e-05	+	64178707	64178798	0	1	91,	0
chr1	64691892	64692251	ENSG00000158966.15	1.5e-07	+	64691892	64692251	0	1	359,	0
chr1	65415869	65416006	ENSG00000222624.1	1.8e-05	+	65415869	65416006	0	1	137,	0
chr1	65570687	65570748	ENSG00000116678.19	0.00054	+	65570687	65570748	0	1	61,	0
chr1	66984722	66984843	ENSG00000198160.14	0.00013	+	66984722	66984843	0	1	121,	0
chr1	67541126	67541233	ENSG00000207504.1	7.1e-05	+	67541126	67541233	0	1	107,	0
chr1	69879729	69879867	ENSG00000240692.3	9.8e-05	+	69879729	69879867	0	1	138,	0
chr1	70205681	70221451	ENSG00000116754.13	9.1e-06	+	70205681	70221451	0	2	99,82,	0,15688
chr1	74198271	74198361	ENSG00000254685.6	0.00012	+	74198271	74198361	0	1	90,	0
chr1	74204728	74204819	ENSG00000254685.6	0.00011	+	74204728	74204819	0	1	91,	0
chr1	74205206	74205326	ENSG00000254685.6	0.00038	+	74205206	74205326	0	1	120,	0
chr1	74198264	74198355	ENSG00000259030.7	0.00021	+	74198264	74198355	0	1	91,	0
chr1	74733151	74733302	ENSG00000162623.16	9.5e-05	+	74733151	74733302	0	1	151,	0
chr1	76700058	76700119	ENSG00000226415.1	0.00031	+	76700058	76700119	0	1	61,	0
chr1	76700357	76700448	ENSG00000226415.1	0.00014	+	76700357	76700448	0	1	91,	0
chr1	77779829	77779980	ENSG00000180488.15	5.6e-10	+	77779829	77779980	0	1	151,	0
chr1	78013360	78013421	ENSG00000162616.9	6.2e-05	+	78013360	78013421	0	1	61,	0
chr1	81943065	81943156	ENSG00000117114.19	0.00079	+	81943065	81943156	0	1	91,	0
chr1	81943244	81943694	ENSG00000117114.19	5.6e-08	+	81943244	81943694	0	1	450,	0
chr1	81990489	81990640	ENSG00000117114.19	0.00034	+	81990489	81990640	0	1	151,	0
chr1	81990759	81990879	ENSG00000117114.19	3.9e-05	+	81990759	81990879	0	1	120,	0
chr1	81991268	81991388	ENSG00000117114.19	1.2e-06	+	81991268	81991388	0	1	120,	0
chr1	84078061	84078122	ENSG00000142875.19	0.00021	+	84078061	84078122	0	1	61,	0
chr1	85580849	85580910	ENSG00000142871.17	0.0029	+	85580849	85580910	0	1	61,	0
chr1	87104622	87104862	ENSG00000153936.17	7.9e-12	+	87104622	87104862	0	1	240,	0
chr1	87328939	87329090	ENSG00000143013.13	2.3e-05	+	87328939	87329090	0	1	151,	0
chr1	87344999	87345060	ENSG00000143013.13	0.00037	+	87344999	87345060	0	1	61,	0
chr1	88684221	88684282	ENSG00000065243.20	0.00035	+	88684221	88684282	0	1	61,	0
chr1	88833436	88833766	ENSG00000065243.20	1.4e-06	+	88833436	88833766	0	1	330,	0
chr1	88816778	88816885	ENSG00000207234.1	2.5e-61	+	88816778	88816885	0	1	107,	0
chr1	89583438	89583529	ENSG00000197147.13	9.8e-05	+	89583438	89583529	0	1	91,	0
chr1	89583768	89583979	ENSG00000197147.13	1e-06	+	89583768	89583979	0	1	211,	0
chr1	89584188	89584578	ENSG00000197147.13	3.6e-06	+	89584188	89584578	0	1	390,	0
chr1	89592888	89592979	ENSG00000197147.13	0.0017	+	89592888	89592979	0	1	91,	0
chr1	89593457	89593548	ENSG00000197147.13	7.1e-05	+	89593457	89593548	0	1	91,	0
chr1	89713084	89713205	ENSG00000171488.15	3.6e-05	+	89713084	89713205	0	1	121,	0
chr1	89713414	89713595	ENSG00000171488.15	1.8e-08	+	89713414	89713595	0	1	181,	0
chr1	89714524	89714854	ENSG00000171488.15	2.8e-07	+	89714524	89714854	0	1	330,	0
chr1	89714973	89715034	ENSG00000171488.15	5.1e-05	+	89714973	89715034	0	1	61,	0
chr1	89718991	89719052	ENSG00000171488.15	0.00054	+	89718991	89719052	0	1	61,	0
chr1	89934873	89935234	ENSG00000171492.14	3.2e-06	+	89934873	89935234	0	1	361,	0
chr1	90657802	90657964	ENSG00000199666.2	3.4e-08	+	90657802	90657964	0	1	162,	0
chr1	91524144	91524235	ENSG00000097046.13	0.00052	+	91524144	91524235	0	1	91,	0
chr1	93136770	93136950	ENSG00000143033.18	3.5e-07	+	93136770	93136950	0	1	180,	0
chr1	93345906	93346057	ENSG00000117505.13	2.3e-07	+	93345906	93346057	0	1	151,	0
chr1	93346355	93346745	ENSG00000117505.13	2.7e-07	+	93346355	93346745	0	1	390,	0
chr1	93847562	93847772	ENSG00000260464.1	1.6e-38	+	93847562	93847772	0	1	210,	0
chr1	95244444	95244593	ENSG00000271092.5	0.00021	+	95244444	95244593	0	1	149,	0
chr1	95244480	95244600	ENSG00000122481.17	0.00037	+	95244480	95244600	0	1	120,	0
chr1	96447608	96447964	ENSG00000228502.1	2.2e-06	+	96447608	96447964	0	1	356,	0
chr1	99307014	99307075	ENSG00000117600.12	0.001	+	99307014	99307075	0	1	61,	0
chr1	99861530	99861651	ENSG00000162688.17	4.5e-06	+	99861530	99861651	0	1	121,	0
chr1	100082275	100082395	ENSG00000283761.1	2.7e-05	+	100082275	100082395	0	1	120,	0
chr1	100082276	100082396	ENSG00000156875.14	2.7e-05	+	100082276	100082396	0	1	120,	0
chr1	107057754	107058024	ENSG00000198890.8	9.8e-06	+	107057754	107058024	0	1	270,	0
chr1	107058531	107058652	ENSG00000198890.8	0.00014	+	107058531	107058652	0	1	121,	0
chr1	108200309	108200428	ENSG00000260879.1	0.00014	+	108200309	108200428	0	1	119,	0
chr1	108635241	108635362	ENSG00000162636.16	0.00019	+	108635241	108635362	0	1	121,	0
chr1	108699600	108699661	ENSG00000134186.12	0.0013	+	108699600	108699661	0	1	61,	0
chr1	109090729	109091716	ENSG00000215717.6	2.8e-07	+	109090729	109091716	0	2	153,57,	0,930
chr1	109214812	109215082	ENSG00000031698.13	1.1e-08	+	109214812	109215082	0	1	270,	0
chr1	109237257	109237794	ENSG00000031698.13	4.9e-07	+	109237257	109237794	0	2	116,64,	0,473
chr1	109237972	109238182	ENSG00000031698.13	3.3e-05	+	109237972	109238182	0	1	210,	0
chr1	109250317	109250408	ENSG00000143126.8	0.00065	+	109250317	109250408	0	1	91,	0
chr1	109250677	109250738	ENSG00000143126.8	0.001	+	109250677	109250738	0	1	61,	0
chr1	109253135	109253256	ENSG00000143126.8	0.001	+	109253135	109253256	0	1	121,	0
chr1	109258597	109258717	ENSG00000143126.8	7.1e-05	+	109258597	109258717	0	1	120,	0
chr1	109274641	109274912	ENSG00000143126.8	1.1e-06	+	109274641	109274912	0	1	271,	0
chr1	109592411	109592712	ENSG00000065135.11	5e-18	+	109592411	109592712	0	1	301,	0
chr1	110049486	110049547	ENSG00000143093.15	0.00076	+	110049486	110049547	0	1	61,	0
chr1	110338685	110338805	ENSG00000162775.16	7.1e-05	+	110338685	110338805	0	1	120,	0
chr1	110340151	110340421	ENSG00000162775.16	4.6e-09	+	110340151	110340421	0	1	270,	0
chr1	110340600	110341619	ENSG00000162775.16	5e-15	+	110340600	110341619	0	1	1019,	0
chr1	110341737	110341798	ENSG00000162775.16	0.00051	+	110341737	110341798	0	1	61,	0
chr1	110341947	110342187	ENSG00000162775.16	3.2e-12	+	110341947	110342187	0	1	240,	0
chr1	110347355	110347776	ENSG00000224699.9	5e-13	+	110347355	110347776	0	1	421,	0
chr1	111041833	111041925	ENSG00000252760.1	5.1e-05	+	111041833	111041925	0	1	92,	0
chr1	111139626	111139747	ENSG00000134255.14	0.00011	+	111139626	111139747	0	1	121,	0
chr1	111448893	111449777	ENSG00000116459.11	2.5e-16	+	111448893	111449777	0	3	56,387,96,	0,301,788
chr1	111762224	111762345	ENSG00000064703.12	0.00028	+	111762224	111762345	0	1	121,	0
chr1	111765939	111766806	ENSG00000064703.12	1.2e-10	+	111765939	111766806	0	1	867,	0
chr1	111767073	111767224	ENSG00000064703.12	1.2e-06	+	111767073	111767224	0	1	151,	0
chr1	112456882	112457093	ENSG00000143079.15	3.6e-06	+	112456882	112457093	0	1	211,	0
chr1	112457331	112457392	ENSG00000143079.15	0.0002	+	112457331	112457392	0	1	61,	0
chr1	112458050	112458231	ENSG00000143079.15	8.9e-06	+	112458050	112458231	0	1	181,	0
chr1	112619804	112647240	ENSG00000116489.13	6.6e-10	+	112619804	112647240	0	3	79,40,31,	0,26950,27405
chr1	113073197	113073258	ENSG00000198799.12	1.8e-05	+	113073197	113073258	0	1	61,	0
chr1	113684215	113684276	ENSG00000081026.19	0.0019	+	113684215	113684276	0	1	61,	0
chr1	113905632	113905693	ENSG00000118655.7	0.00087	+	113905632	113905693	0	1	61,	0
chr1	113911657	113911838	ENSG00000118655.7	3.2e-06	+	113911657	113911838	0	1	181,	0
chr1	113912047	113912227	ENSG00000118655.7	7.4e-05	+	113912047	113912227	0	1	180,	0
chr1	113912946	113913037	ENSG00000118655.7	0.00065	+	113912946	113913037	0	1	91,	0
chr1	114727719	114727824	ENSG00000201900.1	0.00014	+	114727719	114727824	0	1	105,	0
chr1	115691515	115691576	ENSG00000173218.15	0.00068	+	115691515	115691576	0	1	61,	0
chr1	115992188	116019677	ENSG00000163393.13	7.1e-05	+	115992188	116019677	0	2	55,96,	0,27393
chr1	116278712	116278821	ENSG00000221040.2	0.001	+	116278712	116278821	0	1	109,	0
chr1	116941915	116942006	ENSG00000134247.10	0.00013	+	116941915	116942006	0	1	91,	0
chr1	116961445	116961566	ENSG00000134247.10	2.3e-05	+	116961445	116961566	0	1	121,	0
chr1	117075158	117075279	ENSG00000116830.12	0.00076	+	117075158	117075279	0	1	121,	0
chr1	117368136	117368377	ENSG00000198162.12	1e-06	+	117368136	117368377	0	1	241,	0
chr1	117522946	117523156	ENSG00000198162.12	2.8e-08	+	117522946	117523156	0	1	210,	0
chr1	117623602	117623693	ENSG00000183508.5	0.00065	+	117623602	117623693	0	1	91,	0
chr1	117929719	117929870	ENSG00000065183.16	8.7e-05	+	117929719	117929870	0	1	151,	0
chr1	119182989	119183050	ENSG00000231365.6	0.00012	+	119182989	119183050	0	1	61,	0
chr1	119711840	119712050	ENSG00000092621.12	1.6e-19	+	119711840	119712050	0	1	210,	0
chr1	119721416	119721597	ENSG00000092621.12	1.3e-26	+	119721416	119721597	0	1	181,	0
chr1	119724447	119724883	ENSG00000092621.12	0.002	+	119724447	119724883	0	2	22,99,	0,337
chr1	144412575	144412740	ENSG00000207205.1	1e-226	+	144412575	144412740	0	1	165,	0
chr1	145281115	145281279	ENSG00000207501.1	0	+	145281115	145281279	0	1	164,	0
chr1	145281115	145281347	ENSG00000276216.1	0	+	145281115	145281347	0	1	232,	0
chr1	147618945	147619155	ENSG00000116128.11	3.8e-07	+	147618945	147619155	0	1	210,	0
chr1	147619452	147619513	ENSG00000116128.11	6.2e-05	+	147619452	147619513	0	1	61,	0
chr1	147620497	147620707	ENSG00000116128.11	6.2e-06	+	147620497	147620707	0	1	210,	0
chr1	147625110	147625171	ENSG00000116128.11	0.00038	+	147625110	147625171	0	1	61,	0
chr1	148330294	148330415	ENSG00000224481.3	0.002	+	148330294	148330415	0	1	121,	0
chr1	148330295	148330394	ENSG00000252744.1	0.002	+	148330295	148330394	0	1	99,	0
chr1	148522600	148522765	ENSG00000274210.1	2.5e-17	+	148522600	148522765	0	1	165,	0
chr1	148981451	148981632	ENSG00000178104.19	2.1e-07	+	148981451	148981632	0	1	181,	0
chr1	149832658	149832778	ENSG00000270882.2	0.001	+	149832658	149832778	0	1	120,	0
chr1	149887889	149888009	ENSG00000178096.9	0.00012	+	149887889	149888009	0	1	120,	0
chr1	149900499	149900738	ENSG00000178096.9	3.8e-07	+	149900499	149900738	0	1	239,	0
chr1	150159015	150159106	ENSG00000023902.14	6.2e-05	+	150159015	150159106	0	1	91,	0
chr1	150159465	150159616	ENSG00000023902.14	1.8e-06	+	150159465	150159616	0	1	151,	0
chr1	150211690	150211866	ENSG00000266187.2	0.00014	+	150211690	150211866	0	1	176,	0
chr1	150237020	150237156	ENSG00000222222.1	2.5e-15	+	150237020	150237156	0	1	136,	0
chr1	150293838	150294039	ENSG00000266472.5	2.7e-05	+	150293838	150294039	0	2	60,120,	0,81
chr1	150460060	150460151	ENSG00000163125.15	0.00012	+	150460060	150460151	0	1	91,	0
chr1	150471000	150471270	ENSG00000163125.15	1.8e-06	+	150471000	150471270	0	1	270,	0
chr1	150471598	150471689	ENSG00000163125.15	0.00056	+	150471598	150471689	0	1	91,	0
chr1	150472585	150472706	ENSG00000163125.15	5.8e-05	+	150472585	150472706	0	1	121,	0
chr1	150473304	150473364	ENSG00000163125.15	0.00068	+	150473304	150473364	0	1	60,	0
chr1	150950809	150950930	ENSG00000143379.12	0.00063	+	150950809	150950930	0	1	121,	0
chr1	150960832	150961042	ENSG00000143379.12	2.2e-07	+	150960832	150961042	0	1	210,	0
chr1	150963659	150963720	ENSG00000143379.12	0.00065	+	150963659	150963720	0	1	61,	0
chr1	151034075	151034493	ENSG00000143363.17	1.2e-07	+	151034075	151034493	0	1	418,	0
chr1	151034581	151034641	ENSG00000143363.17	0.0013	+	151034581	151034641	0	1	60,	0
chr1	151050655	151050715	ENSG00000143443.9	0.002	+	151050655	151050715	0	1	60,	0
chr1	151248132	151248342	ENSG00000143398.20	1.3e-14	+	151248132	151248342	0	1	210,	0
chr1	151282067	151282395	ENSG00000143373.18	0.00012	+	151282067	151282395	0	2	12,108,	0,220
chr1	151286333	151286454	ENSG00000143373.18	5.8e-05	+	151286333	151286454	0	1	121,	0
chr1	151286513	151286904	ENSG00000143373.18	1.3e-06	+	151286513	151286904	0	1	391,	0
chr1	151287202	151287293	ENSG00000143373.18	0.00037	+	151287202	151287293	0	1	91,	0
chr1	151291546	151291697	ENSG00000143373.18	7.6e-07	+	151291546	151291697	0	1	151,	0
chr1	151291905	151291966	ENSG00000143373.18	0.00065	+	151291905	151291966	0	1	61,	0
chr1	151399559	151399710	ENSG00000159377.11	1.3e-12	+	151399559	151399710	0	1	151,	0
chr1	153634071	153634251	ENSG00000160679.13	3.5e-06	+	153634071	153634251	0	1	180,	0
chr1	153645228	153645498	ENSG00000160679.13	3.2e-18	+	153645228	153645498	0	1	270,	0
chr1	153661265	153661444	ENSG00000143553.10	2.3e-07	+	153661265	153661444	0	1	179,	0
chr1	154260910	154261001	ENSG00000143569.19	8.9e-05	+	154260910	154261001	0	1	91,	0
chr1	154983337	154983398	ENSG00000160688.19	0.00085	+	154983337	154983398	0	1	61,	0
chr1	154988085	154988266	ENSG00000160688.19	1.3e-06	+	154988085	154988266	0	1	181,	0
chr1	154988475	154988836	ENSG00000160688.19	5.2e-10	+	154988475	154988836	0	1	361,	0
chr1	154993585	154993673	ENSG00000163352.5	0.00028	+	154993585	154993673	0	1	88,	0
chr1	155014979	155015040	ENSG00000160685.13	0.00035	+	155014979	155015040	0	1	61,	0
chr1	155015188	155015339	ENSG00000160685.13	7.1e-05	+	155015188	155015339	0	1	151,	0
chr1	155016460	155016520	ENSG00000160685.13	0.00052	+	155016460	155016520	0	1	60,	0
chr1	155016728	155016789	ENSG00000160685.13	0.0017	+	155016728	155016789	0	1	61,	0
chr1	155134157	155134336	ENSG00000169242.12	7.1e-05	+	155134157	155134336	0	1	179,	0
chr1	155138346	155138467	ENSG00000169241.19	1.8e-06	+	155138346	155138467	0	1	121,	0
chr1	155308837	155309078	ENSG00000160752.14	4e-11	+	155308837	155309078	0	1	241,	0
chr1	155614429	155614609	ENSG00000125459.15	0.00021	+	155614429	155614609	0	1	180,	0
chr1	155748032	155748455	ENSG00000203761.5	7.1e-05	+	155748032	155748455	0	2	95,56,	0,367
chr1	156239771	156240042	ENSG00000160783.19	1.3e-08	+	156239771	156240042	0	1	271,	0
chr1	156750699	156767563	ENSG00000143294.15	0.00026	+	156750699	156767563	0	2	32,29,	0,16835
chr1	156786660	156787050	ENSG00000143294.15	5e-12	+	156786660	156787050	0	1	390,	0
chr1	156800485	156800815	ENSG00000143294.15	7.1e-05	+	156800485	156800815	0	1	330,	0
chr1	159178472	159178559	ENSG00000222552.1	0.00054	+	159178472	159178559	0	1	87,	0
chr1	160358263	160358413	ENSG00000162736.17	6.5e-06	+	160358263	160358413	0	1	150,	0
chr1	160425170	160425291	ENSG00000162738.6	1.2e-05	+	160425170	160425291	0	1	121,	0
chr1	161118115	161118265	ENSG00000158793.14	0.00021	+	161118115	161118265	0	1	150,	0
chr1	161158495	161158646	ENSG00000143222.12	0.00015	+	161158495	161158646	0	1	151,	0
chr1	161166620	161166716	ENSG00000143224.18	3.5e-05	+	161166620	161166716	0	2	52,39,	0,57
chr1	161230356	161230537	ENSG00000158882.15	2.8e-07	+	161230356	161230537	0	1	181,	0
chr1	161314316	161314557	ENSG00000143252.14	3.2e-14	+	161314316	161314557	0	1	241,	0
chr1	161406522	161406640	ENSG00000215840.3	7.1e-05	+	161406522	161406640	0	1	118,	0
chr1	161958687	161958838	ENSG00000118217.6	3.3e-06	+	161958687	161958838	0	1	151,	0
chr1	162562529	162566266	ENSG00000117143.13	3.2e-11	+	162562529	162566266	0	2	15,255,	0,3482
chr1	162599482	162599573	ENSG00000117143.13	0.00062	+	162599482	162599573	0	1	91,	0
chr1	162780387	162780448	ENSG00000162733.18	7.6e-06	+	162780387	162780448	0	1	61,	0
chr1	164639564	164639671	ENSG00000207082.1	4.5e-06	+	164639564	164639671	0	1	107,	0
chr1	165827763	165827824	ENSG00000143179.16	0.0003	+	165827763	165827824	0	1	61,	0
chr1	165907871	165908082	ENSG00000143179.16	3.9e-07	+	165907871	165908082	0	1	211,	0
chr1	166849214	166849544	ENSG00000143157.11	6e-09	+	166849214	166849544	0	1	330,	0
chr1	166849633	166849844	ENSG00000143157.11	1.8e-08	+	166849633	166849844	0	1	211,	0
chr1	166849993	166850263	ENSG00000143157.11	1e-14	+	166849993	166850263	0	1	270,	0
chr1	166852659	166853019	ENSG00000143157.11	2e-19	+	166852659	166853019	0	1	360,	0
chr1	167005958	167006077	ENSG00000200036.1	5e-67	+	167005958	167006077	0	1	119,	0
chr1	167220875	167241414	ENSG00000143190.23	0.00063	+	167220875	167241414	0	2	83,8,	0,20531
chr1	167415659	167415839	ENSG00000143190.23	6.6e-06	+	167415659	167415839	0	1	180,	0
chr1	167418325	167418386	ENSG00000143190.23	0.001	+	167418325	167418386	0	1	61,	0
chr1	167425786	167425877	ENSG00000143190.23	0.00014	+	167425786	167425877	0	1	91,	0
chr1	168023996	168038466	ENSG00000143164.15	2e-07	+	168023996	168038466	0	2	54,96,	0,14374
chr1	168242644	168242825	ENSG00000213064.10	2.2e-07	+	168242644	168242825	0	1	181,	0
chr1	169376545	169376636	ENSG00000117475.14	9.8e-05	+	169376545	169376636	0	1	91,	0
chr1	169853509	169853600	ENSG00000000460.17	7.1e-05	+	169853509	169853600	0	1	91,	0
chr1	171536103	171536224	ENSG00000117523.16	2.4e-09	+	171536103	171536224	0	1	121,	0
chr1	171540093	171540184	ENSG00000117523.16	0.00052	+	171540093	171540184	0	1	91,	0
chr1	171540692	171540933	ENSG00000117523.16	5e-14	+	171540692	171540933	0	1	241,	0
chr1	171541232	171541472	ENSG00000117523.16	1e-07	+	171541232	171541472	0	1	240,	0
chr1	171541861	171542101	ENSG00000117523.16	2.5e-13	+	171541861	171542101	0	1	240,	0
chr1	171557585	171557856	ENSG00000117523.16	4e-06	+	171557585	171557856	0	1	271,	0
chr1	171584438	171587049	ENSG00000117523.16	6.3e-05	+	171584438	171587049	0	2	103,47,	0,2564
chr1	171591652	171591923	ENSG00000117523.16	5e-08	+	171591652	171591923	0	1	271,	0
chr1	171796818	171797058	ENSG00000010165.20	1.8e-06	+	171796818	171797058	0	1	240,	0
chr1	172589225	172589346	ENSG00000094975.14	0.00031	+	172589225	172589346	0	1	121,	0
chr1	172610068	172610368	ENSG00000094975.14	4.4e-09	+	172610068	172610368	0	1	300,	0
chr1	173477329	173481273	ENSG00000117592.9	2.5e-21	+	173477329	173481273	0	2	163,75,	0,3869
chr1	173785346	173785437	ENSG00000076321.11	0.00014	+	173785346	173785437	0	1	91,	0
chr1	173791745	173791887	ENSG00000200674.1	1.6e-28	+	173791745	173791887	0	1	142,	0
chr1	173824891	173825281	ENSG00000117593.12	1.6e-19	+	173824891	173825281	0	1	390,	0
chr1	173853530	173853621	ENSG00000117593.12	0.0001	+	173853530	173853621	0	1	91,	0
chr1	177171376	177171557	ENSG00000198797.7	2.2e-06	+	177171376	177171557	0	1	181,	0
chr1	178560912	178561029	ENSG00000201347.1	1.3e-15	+	178560912	178561029	0	1	117,	0
chr1	178916382	178916713	ENSG00000116191.17	1.5e-08	+	178916382	178916713	0	1	331,	0
chr1	179072137	179072437	ENSG00000116199.12	1.8e-06	+	179072137	179072437	0	1	300,	0
chr1	179095236	179095446	ENSG00000186283.14	3.2e-11	+	179095236	179095446	0	1	210,	0
chr1	179353621	179353861	ENSG00000057252.13	3.1e-10	+	179353621	179353861	0	1	240,	0
chr1	179355596	179355717	ENSG00000057252.13	2.2e-06	+	179355596	179355717	0	1	121,	0
chr1	179917871	179918171	ENSG00000143337.18	4.3e-09	+	179917871	179918171	0	1	300,	0
chr1	179996823	179997123	ENSG00000135837.16	6.8e-07	+	179996823	179997123	0	1	300,	0
chr1	180014317	180014438	ENSG00000135837.16	0.00012	+	180014317	180014438	0	1	121,	0
chr1	180020626	180020687	ENSG00000135837.16	0.00024	+	180020626	180020687	0	1	61,	0
chr1	180111189	180111400	ENSG00000135837.16	4.5e-06	+	180111189	180111400	0	1	211,	0
chr1	180884345	180884556	ENSG00000143324.13	5.1e-07	+	180884345	180884556	0	1	211,	0
chr1	180758721	180758817	ENSG00000283575.1	7.9e-18	+	180758721	180758817	0	1	96,	0
chr1	181317929	181413148	ENSG00000198216.12	1.3e-07	+	181317929	181413148	0	2	194,16,	0,95203
chr1	182839346	182839804	ENSG00000135829.17	7.2e-10	+	182839346	182839804	0	2	110,71,	0,387
chr1	183142716	183143047	ENSG00000135862.6	1.9e-07	+	183142716	183143047	0	1	331,	0
chr1	183527979	183528963	ENSG00000116698.21	0.00089	+	183527979	183528963	0	2	48,72,	0,912
chr1	183546047	183546138	ENSG00000116698.21	0.00068	+	183546047	183546138	0	1	91,	0
chr1	185100307	185100427	ENSG00000121481.11	0.00054	+	185100307	185100427	0	1	120,	0
chr1	186420658	186420779	ENSG00000157181.16	7.1e-05	+	186420658	186420779	0	1	121,	0
chr1	186421167	186421228	ENSG00000157181.16	0.00065	+	186421167	186421228	0	1	61,	0
chr1	186988380	186988471	ENSG00000116711.10	0.001	+	186988380	186988471	0	1	91,	0
chr1	192716240	192716387	ENSG00000231767.4	0.00011	+	192716240	192716387	0	1	147,	0
chr1	193069268	193069329	ENSG00000116747.12	0.00085	+	193069268	193069329	0	1	61,	0
chr1	197916557	197917370	ENSG00000143355.16	1.6e-13	+	197916557	197917370	0	2	194,16,	0,797
chr1	199888158	199888261	ENSG00000200139.1	0.00014	+	199888158	199888261	0	1	103,	0
chr1	200739587	200739827	ENSG00000118200.14	3e-08	+	200739587	200739827	0	1	240,	0
chr1	200848139	200848259	ENSG00000118200.14	0.00017	+	200848139	200848259	0	1	120,	0
chr1	200848617	200848798	ENSG00000118200.14	9.5e-05	+	200848617	200848798	0	1	181,	0
chr1	200848856	200849067	ENSG00000118200.14	1.3e-05	+	200848856	200849067	0	1	211,	0
chr1	200849963	200850024	ENSG00000118200.14	0.00046	+	200849963	200850024	0	1	61,	0
chr1	200857832	200858281	ENSG00000118200.14	1.4e-06	+	200857832	200858281	0	1	449,	0
chr1	201820163	201820314	ENSG00000134369.15	3.5e-05	+	201820163	201820314	0	1	151,	0
chr1	201876105	201876556	ENSG00000198700.10	1e-19	+	201876105	201876556	0	1	451,	0
chr1	201878054	201878115	ENSG00000198700.10	0.00028	+	201878054	201878115	0	1	61,	0
chr1	201879163	201879284	ENSG00000198700.10	0.00018	+	201879163	201879284	0	1	121,	0
chr1	201955502	201957511	ENSG00000134375.11	4.2e-07	+	201955502	201957511	0	3	50,100,1,	0,1778,2008
chr1	201965540	201969796	ENSG00000134375.11	2.9e-06	+	201965540	201969796	0	2	3,328,	0,3928
chr1	202861753	202873099	ENSG00000234996.4	3e-10	+	202861753	202873099	0	3	56,80,43,	0,10446,11303
chr1	203307684	203307805	ENSG00000159388.6	0.00037	+	203307684	203307805	0	1	121,	0
chr1	203739893	203740193	ENSG00000058668.14	1e-12	+	203739893	203740193	0	1	300,	0
chr1	203797200	203797291	ENSG00000058673.16	0.0015	+	203797200	203797291	0	1	91,	0
chr1	203799837	203799898	ENSG00000058673.16	0.00059	+	203799837	203799898	0	1	61,	0
chr1	203853739	203853950	ENSG00000058673.16	7.9e-11	+	203853739	203853950	0	1	211,	0
chr1	203799813	203799904	ENSG00000257315.2	0.00052	+	203799813	203799904	0	1	91,	0
chr1	203847312	203847373	ENSG00000257315.2	0.0003	+	203847312	203847373	0	1	61,	0
chr1	203853711	203853952	ENSG00000257315.2	7.9e-11	+	203853711	203853952	0	1	241,	0
chr1	203861628	203861748	ENSG00000182004.13	0.00028	+	203861628	203861748	0	1	120,	0
chr1	204126216	204126307	ENSG00000143842.15	0.00016	+	204126216	204126307	0	1	91,	0
chr1	204516378	204516469	ENSG00000198625.13	0.00016	+	204516378	204516469	0	1	91,	0
chr1	204549361	204549632	ENSG00000198625.13	5e-17	+	204549361	204549632	0	1	271,	0
chr1	204550381	204550442	ENSG00000198625.13	0.00011	+	204550381	204550442	0	1	61,	0
chr1	206647963	206648174	ENSG00000143479.17	0.00016	+	206647963	206648174	0	1	211,	0
chr1	206648323	206648564	ENSG00000143479.17	1.8e-05	+	206648323	206648564	0	1	241,	0
chr1	206732724	206732995	ENSG00000162889.10	3.2e-11	+	206732724	206732995	0	1	271,	0
chr1	207049289	207053302	ENSG00000123836.15	2.3e-05	+	207049289	207053302	0	3	10,172,28,	0,174,3985
chr1	207321615	207321826	ENSG00000196352.15	7.4e-05	+	207321615	207321826	0	1	211,	0
chr1	209851462	209851642	ENSG00000117597.18	0.00039	+	209851462	209851642	0	1	180,	0
chr1	210242369	210242430	ENSG00000082497.12	0.00054	+	210242369	210242430	0	1	61,	0
chr1	211313269	211313514	ENSG00000117625.13	3.5e-05	+	211313269	211313514	0	2	29,91,	0,154
chr1	211313752	211313873	ENSG00000117625.13	1.8e-05	+	211313752	211313873	0	1	121,	0
chr1	212100706	212100796	ENSG00000143476.18	0.0003	+	212100706	212100796	0	1	90,	0
chr1	212101034	212103001	ENSG00000143476.18	3.2e-05	+	212101034	212103001	0	2	50,160,	0,1807
chr1	212619669	212619760	ENSG00000162772.17	0.0002	+	212619669	212619760	0	1	91,	0
chr1	213241648	213241829	ENSG00000136643.12	3.7e-05	+	213241648	213241829	0	1	181,	0
chr1	213242067	213242187	ENSG00000136643.12	0.00063	+	213242067	213242187	0	1	120,	0
chr1	214603194	214603507	ENSG00000117724.13	1.7e-05	+	214603194	214603507	0	2	127,24,	0,289
chr1	214642153	214642243	ENSG00000117724.13	0.00038	+	214642153	214642243	0	1	90,	0
chr1	214642422	214642812	ENSG00000117724.13	7.9e-10	+	214642422	214642812	0	1	390,	0
chr1	214644642	214644792	ENSG00000117724.13	0.00012	+	214644642	214644792	0	1	150,	0
chr1	214645599	214645750	ENSG00000117724.13	3.2e-07	+	214645599	214645750	0	1	151,	0
chr1	214647066	214647336	ENSG00000117724.13	1.6e-09	+	214647066	214647336	0	1	270,	0
chr1	214656983	214657193	ENSG00000117724.13	5.4e-08	+	214656983	214657193	0	1	210,	0
chr1	215620104	215620284	ENSG00000136636.13	2.5e-09	+	215620104	215620284	0	1	180,	0
chr1	220813578	220813729	ENSG00000186205.13	1.8e-05	+	220813578	220813729	0	1	151,	0
chr1	222628015	222628106	ENSG00000154305.18	5e-05	+	222628015	222628106	0	1	91,	0
chr1	222629003	222629124	ENSG00000154305.18	3.3e-05	+	222629003	222629124	0	1	121,	0
chr1	222665460	222665641	ENSG00000154305.18	3.7e-06	+	222665460	222665641	0	1	181,	0
chr1	223002676	223002737	ENSG00000154309.8	0.00028	+	223002676	223002737	0	1	61,	0
chr1	224157824	224158004	ENSG00000143756.12	2.5e-10	+	224157824	224158004	0	1	180,	0
chr1	224158213	224158274	ENSG00000143756.12	8.7e-05	+	224158213	224158274	0	1	61,	0
chr1	224175874	224183692	ENSG00000143753.13	1e-09	+	224175874	224183692	0	3	73,179,18,	0,7365,7800
chr1	224189644	224191133	ENSG00000143753.13	3.2e-27	+	224189644	224191133	0	2	675,42,	0,1447
chr1	224192486	224192725	ENSG00000143753.13	6.3e-17	+	224192486	224192725	0	1	239,	0
chr1	224376764	224376825	ENSG00000143771.12	0.00035	+	224376764	224376825	0	1	61,	0
chr1	224434659	224434918	ENSG00000143786.8	7.9e-13	+	224434659	224434918	0	2	203,7,	0,252
chr1	226062029	226062827	ENSG00000163041.11	6.5e-06	+	226062029	226062827	0	2	65,114,	0,684
chr1	226446054	226446174	ENSG00000223282.1	7.1e-05	+	226446054	226446174	0	1	120,	0
chr1	226895508	226895568	ENSG00000143801.17	0.00035	+	226895508	226895568	0	1	60,	0
chr1	227561180	227561300	ENSG00000202264.1	4e-11	+	227561180	227561300	0	1	120,	0
chr1	227655876	227656056	ENSG00000181450.17	1.6e-05	+	227655876	227656056	0	1	180,	0
chr1	227728538	227728748	ENSG00000143740.14	2.5e-12	+	227728538	227728748	0	1	210,	0
chr1	227732455	227732606	ENSG00000143740.14	6.9e-06	+	227732455	227732606	0	1	151,	0
chr1	227747727	227747907	ENSG00000143740.14	3.6e-05	+	227747727	227747907	0	1	180,	0
chr1	227759116	227759296	ENSG00000143740.14	0.00013	+	227759116	227759296	0	1	180,	0
chr1	227780871	227781111	ENSG00000143740.14	1.6e-08	+	227780871	227781111	0	1	240,	0
chr1	228082659	228083103	ENSG00000143761.16	5e-30	+	228082659	228083103	0	2	191,19,	0,425
chr1	228098048	228098109	ENSG00000143761.16	0.00031	+	228098048	228098109	0	1	61,	0
chr1	228148923	228148984	ENSG00000143774.16	0.0001	+	228148923	228148984	0	1	61,	0
chr1	228175297	228175508	ENSG00000181873.13	3.1e-10	+	228175297	228175508	0	1	211,	0
chr1	228395731	228396757	ENSG00000270094.1	0.001	+	228395731	228396757	0	2	75,15,	0,1011
chr1	228458525	228458645	ENSG00000196890.4	7.9e-11	+	228458525	228458645	0	1	120,	0
chr1	228494360	228494481	ENSG00000168159.12	3.7e-07	+	228494360	228494481	0	1	121,	0
chr1	228555792	228555901	ENSG00000202056.1	1e-195	+	228555792	228555901	0	1	109,	0
chr1	228743712	228743833	ENSG00000116574.6	0.00012	+	228743712	228743833	0	1	121,	0
chr1	229383127	229383188	ENSG00000252506.1	7.1e-05	+	229383127	229383188	0	1	61,	0
chr1	229635658	229635778	ENSG00000135763.10	0.00027	+	229635658	229635778	0	1	120,	0
chr1	229636286	229636647	ENSG00000135763.10	4.5e-08	+	229636286	229636647	0	1	361,	0
chr1	229636735	229637006	ENSG00000135763.10	1.2e-10	+	229636735	229637006	0	1	271,	0
chr1	229637185	229637395	ENSG00000135763.10	1.9e-05	+	229637185	229637395	0	1	210,	0
chr1	229638113	229638204	ENSG00000135763.10	0.00012	+	229638113	229638204	0	1	91,	0
chr1	230279461	230279940	ENSG00000143641.10	6.3e-11	+	230279461	230279940	0	1	479,	0
chr1	230642480	230642541	ENSG00000135775.14	8.9e-06	+	230642480	230642541	0	1	61,	0
chr1	230683407	230684360	ENSG00000135775.14	0.00014	+	230683407	230684360	0	3	21,62,38,	0,166,915
chr1	230693381	230693622	ENSG00000135775.14	6.2e-10	+	230693381	230693622	0	1	241,	0
chr1	230820249	230820358	ENSG00000202063.1	1.7e-08	+	230820249	230820358	0	1	109,	0
chr1	230894226	230894427	ENSG00000240502.2	2.8e-07	+	230894226	230894427	0	1	201,	0
chr1	231337762	231337913	ENSG00000010072.16	3.6e-06	+	231337762	231337913	0	1	151,	0
chr1	231352894	231352955	ENSG00000010072.16	0.00054	+	231352894	231352955	0	1	61,	0
chr1	232037139	232037260	ENSG00000162946.22	0.00028	+	232037139	232037260	0	1	121,	0
chr1	233353891	233354892	ENSG00000143674.11	1.2e-05	+	233353891	233354892	0	2	64,57,	0,944
chr1	233379292	233379682	ENSG00000143674.11	5.4e-08	+	233379292	233379682	0	1	390,	0
chr1	233382544	233382754	ENSG00000143674.11	3.6e-07	+	233382544	233382754	0	1	210,	0
chr1	234607007	234609483	ENSG00000228830.1	6.3e-27	+	234607007	234609483	0	2	630,63,	0,2413
chr1	234904295	234904461	ENSG00000239690.3	1.8e-05	+	234904295	234904461	0	1	166,	0
chr1	235342222	235342313	ENSG00000152904.11	5.5e-06	+	235342222	235342313	0	1	91,	0
chr1	235329558	235329679	ENSG00000285053.1	3.6e-05	+	235329558	235329679	0	1	121,	0
chr1	235330577	235335276	ENSG00000285053.1	0.00076	+	235330577	235335276	0	2	25,35,	0,4664
chr1	235342240	235342880	ENSG00000285053.1	3.5e-06	+	235342240	235342880	0	2	106,45,	0,595
chr1	236267779	236267958	ENSG00000222650.1	6.3e-83	+	236267779	236267958	0	1	179,	0
chr1	236483250	236483311	ENSG00000186197.14	0.001	+	236483250	236483311	0	1	61,	0
chr1	236484023	236484083	ENSG00000244457.2	0.0017	+	236484023	236484083	0	1	60,	0
chr1	236550763	236550913	ENSG00000116977.18	1.9e-05	+	236550763	236550913	0	1	150,	0
chr1	236795291	236795412	ENSG00000116984.13	1e-06	+	236795291	236795412	0	1	121,	0
chr1	236891255	236891316	ENSG00000116984.13	0.00079	+	236891255	236891316	0	1	61,	0
chr1	236897929	236898320	ENSG00000116984.13	7.9e-17	+	236897929	236898320	0	1	391,	0
chr1	236899189	236899370	ENSG00000116984.13	3.5e-06	+	236899189	236899370	0	1	181,	0
chr1	236901768	236901859	ENSG00000116984.13	0.0002	+	236901768	236901859	0	1	91,	0
chr1	236820163	236820282	ENSG00000226498.2	0.00028	+	236820163	236820282	0	1	119,	0
chr1	237927189	237927249	ENSG00000237250.3	0.001	+	237927189	237927249	0	1	60,	0
chr1	237927187	237927248	ENSG00000243781.1	0.001	+	237927187	237927248	0	1	61,	0
chr1	240092977	240093068	ENSG00000155816.20	0.00011	+	240092977	240093068	0	1	91,	0
chr1	241878856	241879067	ENSG00000174371.17	6.6e-07	+	241878856	241879067	0	1	211,	0
chr1	242059313	242059434	ENSG00000224625.2	0.001	+	242059313	242059434	0	1	121,	0
chr1	244053838	244054078	ENSG00000179456.10	1.4e-06	+	244053838	244054078	0	1	240,	0
chr1	244054613	244054823	ENSG00000179456.10	1.8e-08	+	244054613	244054823	0	1	210,	0
chr1	244055031	244055419	ENSG00000179456.10	2e-23	+	244055031	244055419	0	1	388,	0
chr1	244055925	244056045	ENSG00000179456.10	7.4e-05	+	244055925	244056045	0	1	120,	0
chr1	244705652	244705893	ENSG00000121644.19	1e-14	+	244705652	244705893	0	1	241,	0
chr1	244943937	244944216	ENSG00000201758.1	1.6e-25	+	244943937	244944216	0	1	279,	0
chr1	245023014	245023118	ENSG00000252282.1	7.1e-05	+	245023014	245023118	0	1	104,	0
chr1	246665838	246666018	ENSG00000162852.14	6.2e-05	+	246665838	246666018	0	1	180,	0
chr1	248848020	248848141	ENSG00000171161.13	0.00019	+	248848020	248848141	0	1	121,	0
chr1	248918090	248918211	ENSG00000185220.12	0.00054	+	248918090	248918211	0	1	121,	0
chr1	631139	701961	ENSG00000230021.10	5.1e-06	-	631139	701961	0	4	65,86,33,26,	0,1904,67787,70796
chr1	1083525	1083615	ENSG00000131591.17	0.00068	-	1083525	1083615	0	1	90,	0
chr1	1217026	1217147	ENSG00000078808.17	2.4e-05	-	1217026	1217147	0	1	121,	0
chr1	1255160	1255251	ENSG00000160087.20	0.00039	-	1255160	1255251	0	1	91,	0
chr1	1263352	1263472	ENSG00000160087.20	0.00028	-	1263352	1263472	0	1	120,	0
chr1	1313255	1313316	ENSG00000127054.20	9.8e-05	-	1313255	1313316	0	1	61,	0
chr1	1313814	1313875	ENSG00000127054.20	0.0017	-	1313814	1313875	0	1	61,	0
chr1	1319310	1319431	ENSG00000127054.20	7.4e-05	-	1319310	1319431	0	1	121,	0
chr1	1336021	1336082	ENSG00000107404.20	0.00071	-	1336021	1336082	0	1	61,	0
chr1	1386937	1387058	ENSG00000221978.12	0.00028	-	1386937	1387058	0	1	121,	0
chr1	1402027	1402147	ENSG00000242485.6	1.1e-05	-	1402027	1402147	0	1	120,	0
chr1	1407143	1407293	ENSG00000242485.6	5e-11	-	1407143	1407293	0	1	150,	0
chr1	1540473	1540534	ENSG00000205090.9	0.0011	-	1540473	1540534	0	1	61,	0
chr1	1541792	1541972	ENSG00000160075.12	7.6e-07	-	1541792	1541972	0	1	180,	0
chr1	1544891	1545072	ENSG00000160075.12	6e-06	-	1544891	1545072	0	1	181,	0
chr1	1562636	1562726	ENSG00000160075.12	0.0015	-	1562636	1562726	0	1	90,	0
chr1	1564762	1564883	ENSG00000160075.12	0.00039	-	1564762	1564883	0	1	121,	0
chr1	1599357	1599477	ENSG00000228594.4	0.00019	-	1599357	1599477	0	1	120,	0
chr1	1665121	1665332	ENSG00000189339.11	5.1e-07	-	1665121	1665332	0	1	211,	0
chr1	1786813	1786994	ENSG00000078369.18	1.4e-08	-	1786813	1786994	0	1	181,	0
chr1	2412443	2412563	ENSG00000157911.10	0.001	-	2412443	2412563	0	1	120,	0
chr1	3745875	3746116	ENSG00000227372.12	3.3e-05	-	3745875	3746116	0	1	241,	0
chr1	3746414	3746684	ENSG00000227372.12	2e-09	-	3746414	3746684	0	1	270,	0
chr1	3780708	3780828	ENSG00000130764.10	0.00068	-	3780708	3780828	0	1	120,	0
chr1	5933305	5947170	ENSG00000131697.18	0.00054	-	5933305	5947170	0	2	24,67,	0,13798
chr1	6385812	6393435	ENSG00000097021.19	5.1e-05	-	6385812	6393435	0	2	1,179,	0,7444
chr1	6524457	6524668	ENSG00000162408.11	2.9e-05	-	6524457	6524668	0	1	211,	0
chr1	6525714	6525775	ENSG00000162408.11	0.00068	-	6525714	6525775	0	1	61,	0
chr1	6593172	6593353	ENSG00000162413.16	2.1e-07	-	6593172	6593353	0	1	181,	0
chr1	6599290	6599381	ENSG00000162413.16	0.00017	-	6599290	6599381	0	1	91,	0
chr1	6602224	6602404	ENSG00000162413.16	7.1e-05	-	6602224	6602404	0	1	180,	0
chr1	6635482	6635543	ENSG00000007923.16	0.0017	-	6635482	6635543	0	1	61,	0
chr1	6639957	6644638	ENSG00000007923.16	4e-20	-	6639957	6644638	0	2	100,81,	0,4600
chr1	8013332	8013422	ENSG00000116285.13	6.2e-05	-	8013332	8013422	0	1	90,	0
chr1	8013988	8014049	ENSG00000116285.13	0.00014	-	8013988	8014049	0	1	61,	0
chr1	8206487	8206597	ENSG00000200975.1	9.8e-05	-	8206487	8206597	0	1	110,	0
chr1	8861179	8861270	ENSG00000074800.16	0.00011	-	8861179	8861270	0	1	91,	0
chr1	8874836	8875856	ENSG00000074800.16	5e-05	-	8874836	8875856	0	2	81,69,	0,951
chr1	8878007	8878800	ENSG00000074800.16	1e-234	-	8878007	8878800	0	3	26,53,221,	0,207,572
chr1	10456821	10456942	ENSG00000160049.12	3.8e-07	-	10456821	10456942	0	1	121,	0
chr1	10461227	10461497	ENSG00000160049.12	1.6e-18	-	10461227	10461497	0	1	270,	0
chr1	10462741	10462862	ENSG00000160049.12	3.2e-06	-	10462741	10462862	0	1	121,	0
chr1	11789495	11789616	ENSG00000177000.12	0.00028	-	11789495	11789616	0	1	121,	0
chr1	11790483	11790664	ENSG00000177000.12	3.5e-05	-	11790483	11790664	0	1	181,	0
chr1	11803107	11803198	ENSG00000177000.12	0.0012	-	11803107	11803198	0	1	91,	0
chr1	11919948	11920068	ENSG00000116685.16	0.00011	-	11919948	11920068	0	1	120,	0
chr1	16125170	16125260	ENSG00000142627.13	0.00014	-	16125170	16125260	0	1	90,	0
chr1	16148800	16148920	ENSG00000142627.13	0.00054	-	16148800	16148920	0	1	120,	0
chr1	16535202	16535411	ENSG00000233421.4	2e-23	-	16535202	16535411	0	1	209,	0
chr1	17408157	17408331	ENSG00000179051.14	1.1e-05	-	17408157	17408331	0	1	174,	0
chr1	19117875	19117966	ENSG00000127481.15	8.5e-05	-	19117875	19117966	0	1	91,	0
chr1	19124557	19124678	ENSG00000127481.15	3.7e-05	-	19124557	19124678	0	1	121,	0
chr1	19305075	19305182	ENSG00000200403.1	4e-62	-	19305075	19305182	0	1	107,	0
chr1	20485760	20485821	ENSG00000162545.6	0.00019	-	20485760	20485821	0	1	61,	0
chr1	20500106	20500587	ENSG00000090432.7	7.9e-09	-	20500106	20500587	0	1	481,	0
chr1	20501065	20501216	ENSG00000090432.7	3.6e-05	-	20501065	20501216	0	1	151,	0
chr1	20650940	20651090	ENSG00000117242.7	2.1e-06	-	20650940	20651090	0	1	150,	0
chr1	20773556	20773617	ENSG00000127483.18	0.00074	-	20773556	20773617	0	1	61,	0
chr1	20941504	20942075	ENSG00000075151.20	1.2e-05	-	20941504	20942075	0	1	571,	0
chr1	21218055	21218325	ENSG00000117298.16	3.5e-05	-	21218055	21218325	0	1	270,	0
chr1	21219043	21219134	ENSG00000117298.16	0.0002	-	21219043	21219134	0	1	91,	0
chr1	21219552	21219763	ENSG00000117298.16	3.5e-05	-	21219552	21219763	0	1	211,	0
chr1	23091294	23091355	ENSG00000169641.13	0.00028	-	23091294	23091355	0	1	61,	0
chr1	23177687	23177808	ENSG00000169641.13	0.001	-	23177687	23177808	0	1	121,	0
chr1	23310184	23310305	ENSG00000125944.20	1e-05	-	23310184	23310305	0	1	121,	0
chr1	23310483	23310664	ENSG00000125944.20	8.3e-10	-	23310483	23310664	0	1	181,	0
chr1	23344215	23344336	ENSG00000125944.20	0.00028	-	23344215	23344336	0	1	121,	0
chr1	23361481	23361631	ENSG00000125945.15	5.1e-05	-	23361481	23361631	0	1	150,	0
chr1	23361840	23361900	ENSG00000125945.15	0.001	-	23361840	23361900	0	1	60,	0
chr1	23507601	23507662	ENSG00000007968.7	0.002	-	23507601	23507662	0	1	61,	0
chr1	23868174	23868264	ENSG00000179163.11	0.00014	-	23868174	23868264	0	1	90,	0
chr1	24358227	24358347	ENSG00000001460.18	7.1e-05	-	24358227	24358347	0	1	120,	0
chr1	25834948	25835246	ENSG00000127423.10	3.7e-05	-	25834948	25835246	0	1	298,	0
chr1	25900932	25900993	ENSG00000117632.23	0.00051	-	25900932	25900993	0	1	61,	0
chr1	25903791	25905176	ENSG00000117632.23	1.3e-19	-	25903791	25905176	0	4	22,75,80,33,	0,872,1257,1352
chr1	26170788	26170878	ENSG00000236782.7	0.00015	-	26170788	26170878	0	1	90,	0
chr1	26593939	26594041	ENSG00000252802.1	5e-50	-	26593939	26594041	0	1	102,	0
chr1	26890192	26890283	ENSG00000142751.15	0.00014	-	26890192	26890283	0	1	91,	0
chr1	27551290	27551440	ENSG00000126705.14	0.00012	-	27551290	27551440	0	1	150,	0
chr1	27675602	27675709	ENSG00000206767.1	6.3e-21	-	27675602	27675709	0	1	107,	0
chr1	27830767	27830974	ENSG00000286433.1	1.2e-06	-	27830767	27830974	0	1	207,	0
chr1	27974316	27974377	ENSG00000158161.16	0.0013	-	27974316	27974377	0	1	61,	0
chr1	28058058	28088637	ENSG00000158161.16	3e-05	-	28058058	28088637	0	2	36,114,	0,30465
chr1	28031972	28032091	ENSG00000240750.3	0.00035	-	28031972	28032091	0	1	119,	0
chr1	28580985	28581106	ENSG00000197989.14	4.8e-06	-	28580985	28581106	0	1	121,	0
chr1	29119428	29119519	ENSG00000253304.2	0.00052	-	29119428	29119519	0	1	91,	0
chr1	29147832	29148013	ENSG00000116350.17	7.2e-07	-	29147832	29148013	0	1	181,	0
chr1	29148221	29148492	ENSG00000116350.17	2e-07	-	29148221	29148492	0	1	271,	0
chr1	29148581	29148671	ENSG00000116350.17	2.7e-05	-	29148581	29148671	0	1	90,	0
chr1	30872817	30872878	ENSG00000162512.16	0.0017	-	30872817	30872878	0	1	61,	0
chr1	30876687	30876868	ENSG00000162512.16	3.5e-08	-	30876687	30876868	0	1	181,	0
chr1	30964673	30964824	ENSG00000134644.15	7.2e-06	-	30964673	30964824	0	1	151,	0
chr1	31497576	31497683	ENSG00000206981.1	1e-244	-	31497576	31497683	0	1	107,	0
chr1	31630369	31630636	ENSG00000162517.13	1.3e-07	-	31630369	31630636	0	1	267,	0
chr1	31635434	31644213	ENSG00000162517.13	8.3e-09	-	31635434	31644213	0	2	88,91,	0,8688
chr1	31908666	31908846	ENSG00000184007.21	4e-15	-	31908666	31908846	0	1	180,	0
chr1	32216640	32216759	ENSG00000160055.19	7.4e-05	-	32216640	32216759	0	1	119,	0
chr1	32334373	32334612	ENSG00000175130.7	7.9e-33	-	32334373	32334612	0	1	239,	0
chr1	32366296	32366596	ENSG00000160058.18	7.9e-08	-	32366296	32366596	0	1	300,	0
chr1	32376406	32376496	ENSG00000160058.18	0.00024	-	32376406	32376496	0	1	90,	0
chr1	32621478	32621538	ENSG00000176261.15	0.001	-	32621478	32621538	0	1	60,	0
chr1	32775686	32775956	ENSG00000134684.10	6.3e-17	-	32775686	32775956	0	1	270,	0
chr1	32817223	32817464	ENSG00000134684.10	1.3e-09	-	32817223	32817464	0	1	241,	0
chr1	33008419	33008749	ENSG00000004455.16	1.8e-06	-	33008419	33008749	0	1	330,	0
chr1	33336595	33336715	ENSG00000222112.1	0.00028	-	33336595	33336715	0	1	120,	0
chr1	35190701	35190971	ENSG00000116560.11	4e-26	-	35190701	35190971	0	1	270,	0
chr1	35192725	35192816	ENSG00000116560.11	3e-06	-	35192725	35192816	0	1	91,	0
chr1	35292195	35292333	ENSG00000240374.3	5.6e-07	-	35292195	35292333	0	1	138,	0
chr1	35358993	35359165	ENSG00000227409.1	7.9e-05	-	35358993	35359165	0	1	172,	0
chr1	35641375	35641526	ENSG00000126067.12	8.3e-09	-	35641375	35641526	0	1	151,	0
chr1	35720756	35720877	ENSG00000092853.14	2.7e-05	-	35720756	35720877	0	1	121,	0
chr1	35736353	35736414	ENSG00000092853.14	0.00022	-	35736353	35736414	0	1	61,	0
chr1	35760349	35760470	ENSG00000092853.14	0.00016	-	35760349	35760470	0	1	121,	0
chr1	35769887	35769978	ENSG00000092853.14	6.6e-07	-	35769887	35769978	0	1	91,	0
chr1	36136957	36137198	ENSG00000054116.12	6.5e-09	-	36136957	36137198	0	1	241,	0
chr1	36392462	36394031	ENSG00000181817.6	1.6e-13	-	36392462	36394031	0	2	25,596,	0,973
chr1	36455747	36455837	ENSG00000116898.12	4.2e-05	-	36455747	36455837	0	1	90,	0
chr1	37536962	37537113	ENSG00000163877.11	6.2e-05	-	37536962	37537113	0	1	151,	0
chr1	37537770	37537891	ENSG00000163877.11	0.00028	-	37537770	37537891	0	1	121,	0
chr1	37540274	37540424	ENSG00000163877.11	1.9e-06	-	37540274	37540424	0	1	150,	0
chr1	37799836	37800821	ENSG00000233728.1	1.3e-14	-	37799836	37800821	0	2	333,192,	0,793
chr1	37857343	37857494	ENSG00000188786.10	3.5e-05	-	37857343	37857494	0	1	151,	0
chr1	37997158	37997308	ENSG00000183386.10	6.6e-06	-	37997158	37997308	0	1	150,	0
chr1	38046643	38046794	ENSG00000185668.7	1.8e-05	-	38046643	38046794	0	1	151,	0
chr1	38838945	38839275	ENSG00000116954.8	1.2e-09	-	38838945	38839275	0	1	330,	0
chr1	39154163	39154296	ENSG00000222378.1	1.3e-19	-	39154163	39154296	0	1	133,	0
chr1	40256870	40256930	ENSG00000259943.1	0.00054	-	40256870	40256930	0	1	60,	0
chr1	40257729	40257908	ENSG00000259943.1	3.5e-05	-	40257729	40257908	0	1	179,	0
chr1	40514632	40514942	ENSG00000227278.1	2.7e-05	-	40514632	40514942	0	2	2,143,	0,167
chr1	41466936	41467028	ENSG00000252563.1	0.00035	-	41466936	41467028	0	1	92,	0
chr1	42179446	42179747	ENSG00000198815.9	3.3e-07	-	42179446	42179747	0	1	301,	0
chr1	42278441	42311089	ENSG00000198815.9	7.4e-05	-	42278441	42311089	0	2	231,40,	0,32608
chr1	42929218	42929647	ENSG00000117394.22	1.8e-05	-	42929218	42929647	0	2	96,55,	0,374
chr1	43367688	43368044	ENSG00000066322.15	3.5e-05	-	43367688	43368044	0	2	50,130,	0,226
chr1	43384867	43384927	ENSG00000159479.17	0.00059	-	43384867	43384927	0	1	60,	0
chr1	44153384	44153480	ENSG00000200171.1	2.5e-14	-	44153384	44153480	0	1	96,	0
chr1	45018609	45018759	ENSG00000162415.7	0.00014	-	45018609	45018759	0	1	150,	0
chr1	45019057	45019117	ENSG00000162415.7	0.00065	-	45019057	45019117	0	1	60,	0
chr1	45205965	45206025	ENSG00000162415.7	0.002	-	45205965	45206025	0	1	60,	0
chr1	46285425	46285606	ENSG00000132128.16	2.5e-08	-	46285425	46285606	0	1	181,	0
chr1	46635723	46635844	ENSG00000123472.12	1.7e-06	-	46635723	46635844	0	1	121,	0
chr1	46668349	46668410	ENSG00000123472.12	0.00028	-	46668349	46668410	0	1	61,	0
chr1	47251243	47251513	ENSG00000123473.15	6.2e-06	-	47251243	47251513	0	1	270,	0
chr1	47272193	47280462	ENSG00000123473.15	2e-14	-	47272193	47280462	0	2	48,222,	0,8047
chr1	47280730	47280851	ENSG00000123473.15	0.00085	-	47280730	47280851	0	1	121,	0
chr1	51878397	51878577	ENSG00000078618.21	4.2e-06	-	51878397	51878577	0	1	180,	0
chr1	52020726	52020786	ENSG00000117862.12	0.00017	-	52020726	52020786	0	1	60,	0
chr1	52055008	52055128	ENSG00000117862.12	3.8e-05	-	52055008	52055128	0	1	120,	0
chr1	52020715	52020864	ENSG00000285839.1	0.00027	-	52020715	52020864	0	1	149,	0
chr1	52032132	52032310	ENSG00000198841.3	4.5e-06	-	52032132	52032310	0	1	178,	0
chr1	52032368	52032546	ENSG00000198841.3	5.1e-05	-	52032368	52032546	0	1	178,	0
chr1	52366102	52366193	ENSG00000154222.14	0.00019	-	52366102	52366193	0	1	91,	0
chr1	52393488	52393726	ENSG00000085840.13	2e-10	-	52393488	52393726	0	1	238,	0
chr1	52475103	52475254	ENSG00000134744.14	6.2e-07	-	52475103	52475254	0	1	151,	0
chr1	52687551	52687701	ENSG00000162377.6	6.6e-05	-	52687551	52687701	0	1	150,	0
chr1	52687760	52687850	ENSG00000162377.6	0.00076	-	52687760	52687850	0	1	90,	0
chr1	52687909	52688089	ENSG00000162377.6	6.6e-06	-	52687909	52688089	0	1	180,	0
chr1	52772193	52772251	ENSG00000228929.1	0.001	-	52772193	52772251	0	1	58,	0
chr1	52772534	52772591	ENSG00000228929.1	0.00068	-	52772534	52772591	0	1	57,	0
chr1	52805107	52805212	ENSG00000206627.1	1.4e-07	-	52805107	52805212	0	1	105,	0
chr1	52897738	52897829	ENSG00000121310.17	0.00028	-	52897738	52897829	0	1	91,	0
chr1	53210081	53210398	ENSG00000236723.2	2.7e-06	-	53210081	53210398	0	2	131,109,	0,208
chr1	53213325	53213386	ENSG00000236723.2	0.00085	-	53213325	53213386	0	1	61,	0
chr1	53767807	53767987	ENSG00000058804.12	2.5e-11	-	53767807	53767987	0	1	180,	0
chr1	54171207	54171298	ENSG00000215883.10	0.00028	-	54171207	54171298	0	1	91,	0
chr1	54173424	54173574	ENSG00000215883.10	1.1e-06	-	54173424	54173574	0	1	150,	0
chr1	54226835	54226925	ENSG00000157216.15	1.1e-05	-	54226835	54226925	0	1	90,	0
chr1	54757672	54757852	ENSG00000162396.6	0.001	-	54757672	54757852	0	1	180,	0
chr1	54758000	54758239	ENSG00000162396.6	7.6e-07	-	54758000	54758239	0	1	239,	0
chr1	54850164	54850463	ENSG00000116133.13	5e-13	-	54850164	54850463	0	1	299,	0
chr1	54850612	54851718	ENSG00000116133.13	2.5e-11	-	54850612	54851718	0	1	1106,	0
chr1	54851866	54852196	ENSG00000116133.13	3.2e-19	-	54851866	54852196	0	1	330,	0
chr1	54887015	54887195	ENSG00000116133.13	3.5e-05	-	54887015	54887195	0	1	180,	0
chr1	55066658	55066899	ENSG00000162402.14	2.3e-05	-	55066658	55066899	0	1	241,	0
chr1	55067287	55067378	ENSG00000162402.14	3.4e-05	-	55067287	55067378	0	1	91,	0
[truncated: 10,244 more rows]

## Sheet: ORL_2
chr	chromStart	chromEnd	name	score	strand	thickStart	thickEnd	itemRgb	blockCount	blockSizes	blockStarts
[truncated: 7,662 more rows]

[truncated: 1 more sheets: 3,983 high-confidence m6A sites]
